# Supplementary material for: Multi-Label Random Forest Model for Tuberculosis Drug Resistance Classification and Mutation Ranking
Source: PubMed Central journal article supplement (PMC7188832; doi:10.3389/fmicb.2020.00667), 2020-04-22
Supplement: Data_Sheet_1.pdf [file Data_Sheet_1.pdf]

Supplementary I

Accession Numbers, INH, EMB, RIF, PZA

ERR2516654 R R R U  
ERR2516675 R R R R  
ERR2516705 R R R R  
ERR2516592 S S S U  
ERR2516463 R R R R  
ERR2516649 R R R U  
ERR2516632 R R R R  
ERR2516690 R R R U  
ERR2516664 R R R R  
ERR2516576 R R R U  
ERR2516599 R R R R  
ERR2516458 R R R R  
ERR2516706 R R R S  
ERR2516443 R R R S  
ERR2516573 R R R R  
ERR234556 R R R S  
ERR108459 S S S S  
ERR234564 R S S S  
ERR108460 S S S S  
ERR108461 S S S S  
ERR108462 R R R R  
ERR234580 S S S S  
ERR108463 S S S S  
ERR108514 R R R S  
ERR067614 S S S S  
ERR067615 R R S R  
ERR067616 S S S S  
ERR158611 R R R S  
ERR067600 R S S S  
ERR133798 R R R S  
ERR234596 R R R S  
ERR108515 R R S S  
ERR117449 S S S S  
ERR067617 S S S S  
ERR067618 R R S R  
ERR133799 R S S S  
ERR067619 R R R S  
ERR234620 R S R R  
ERR067620 R R R S  
ERR234557 R R R S  
ERR067622 R R R S  
ERR133800 R R S S  
ERR108498 R R R R  
ERR108499 R R S S  
ERR108500 R R S S  
ERR108501 S S S S  
ERR108502 R R S S  
ERR117469 R S S S  
ERR234565 R R S S  
ERR234573 R R S S  
ERR234581 S S S S  
ERR234589 R R R S

Supplementary I

ERR234597 R R S S  
ERR067608 R R S S  
ERR2516525 R R R R  
ERR2516560 R R R R  
ERR2516405 R R R R  
ERR2516488 R R S S  
ERR2516608 R R R S  
ERR2516618 R R S R  
ERR2516464 R R S R  
ERR2516472 R S R R  
ERR2516687 R R S R  
ERR2516734 R R R R  
ERR2516424 R R R R  
ERR2516414 R R R R  
ERR2516697 R R S R  
ERR2516534 R R R R  
ERR2516645 R R R R  
ERR2516647 R R R R  
ERR2516418 R R R R  
ERR2516434 R R R R  
ERR2516500 R R R R  
ERR2516631 R R R S  
ERR2516509 R R R R  
ERR2516732 R R R R  
ERR2516646 R R R R  
ERR2516610 R R R R  
ERR2516547 R R R R  
ERR2516422 R R R R  
ERR2516572 R R R R  
ERR2516698 R R R S  
ERR2516503 R R R R  
ERR2516557 R R R R  
ERR2516425 R R R R  
ERR2516430 R R S R  
ERR2516709 R R R R  
ERR2516467 R R S S  
ERR2516404 R R R R  
ERR2516412 R R R S  
ERR2516490 R R R R  
ERR2516591 R R R U  
ERR2516427 R R R R  
ERR2516717 R R S R  
ERR2516669 R R R S  
ERR2516554 R R S R  
ERR067601 S S S S  
ERR133801 R R R S  
ERR133802 S S S S  
ERR234637 R R R R  
ERR067602 R S S R  
ERR133803 R R S S  
ERR133804 R S S S  
ERR133805 R R S R  
ERR133806 R R S S

Supplementary I

ERR133807 S S S S  
ERR133808 S S S S  
ERR133809 R S S S  
ERR133810 S S S S  
ERR133811 S S S S  
ERR133812 R S S S  
ERR158613 R R R S  
ERR133814 R S S S  
ERR133815 R R S R  
ERR067767 S S S S  
ERR067718 R R R S  
ERR067719 R S R S  
ERR067576 R R R S  
ERR067577 R R S S  
ERR067578 R R S R  
ERR067579 R R R S  
ERR067580 S S S S  
ERR067581 R R R R  
ERR067582 R S R S  
ERR234645 R R R S  
ERR067721 R R R S  
ERR067722 R R R S  
ERR234558 S S S R  
ERR133818 S S S S  
ERR2516512 S S S U  
ERR2516456 S S S U  
ERR2516530 S S S U  
ERR2516600 S S S U  
ERR2516635 S S S U  
ERR2516585 S S S U  
ERR2516677 S S S U  
ERR2516710 R R R R  
ERR2516548 R R R S  
ERR2516552 R R S S  
ERR2516673 R R R R  
ERR2516486 R R S R  
ERR2516502 R R R U  
ERR2516662 R R R S  
ERR2516595 R R R S  
ERR2516602 R R S S  
ERR2516429 R R R S  
ERR2516721 R R R R  
ERR2516616 R R R S  
ERR2516612 S S S S  
ERR2516650 R R R R  
ERR2516540 R R S R  
ERR2516514 R R R R  
ERR2516693 R R R R  
ERR2516704 R R R R  
ERR2516564 R R S R  
ERR2516699 R R R R  
ERR2516605 R S S S  
ERR2516528 R R R R

Supplementary I

ERR2516541 R R R R  
ERR2516485 R R R R  
ERR2516598 R R R S  
ERR2516497 R R S R  
ERR2516433 S S S S  
ERR2516420 S S S S  
ERR2516637 S S S S  
ERR2516581 S S S S  
ERR2516683 S S S S  
ERR2516436 S S S S  
ERR2516611 S S S S  
ERR2516507 S S S S  
ERR2516518 S S S S  
ERR2516691 S S S S  
ERR2516587 S S S S  
ERR2516688 S S S U  
ERR2516469 S S S U  
ERR2516701 S S S U  
ERR2516428 S S S S  
ERR2516511 R R R R  
ERR2516731 R R S R  
ERR2516408 R R R R  
ERR2516625 R R R R  
ERR2516462 R R R R  
ERR2516724 R R R R  
ERR2516708 R R R S  
ERR2516538 R S S R  
ERR2516517 R R S R  
ERR2516523 R R R R  
ERR2516685 R R R S  
ERR2516437 R R S S  
ERR2516409 R R R R  
ERR2516441 R R R S  
ERR2516558 R R R R  
ERR2516570 R R R R  
ERR2516630 R R R R  
ERR2516658 R R R R  
ERR2516451 R R R S  
ERR2516682 R R R R  
ERR2516665 R R R R  
ERR2516702 R S R S  
ERR2516648 R R R R  
ERR2516624 R R R R  
ERR2516716 R R R R  
ERR2516681 S S S S  
ERR2516623 R R R S  
ERR2516452 R S S S  
ERR2516532 R R R R  
ERR2516738 R R R R  
ERR2516678 R R R R  
ERR2516496 R R R R  
ERR2516666 R R R R  
ERR133819 S S S S

Supplementary I

ERR067583 R R R S  
ERR067584 R R R S  
ERR067585 S S S S  
ERR067607 R R R R  
ERR133820 S S S S  
ERR067586 R S R R  
ERR133822 S R S R  
ERR133823 R R R S  
ERR133824 R R R S  
ERR133826 R R R S  
ERR133827 R R R R  
ERR133829 S S S S  
ERR133830 S S S S  
ERR133831 R R R S  
ERR133832 S S S R  
ERR133833 S S S S  
ERR133834 R R S S  
ERR133835 R S S R  
ERR133836 R R S S  
ERR133837 R R S S  
ERR234574 R R S S  
ERR234582 S S S S  
ERR067723 R R S S  
ERR117450 S S S S  
ERR133838 R S S S  
ERR234590 R R R S  
ERR133839 R R R S  
ERR133840 S S S S  
ERR2516446 S S S S  
ERR2516737 S S S S  
ERR2516707 S S S U  
ERR2516644 R S R R  
ERR2516455 R R R R  
ERR2516589 R R S S  
ERR2516492 R R R R  
ERR2516597 R R R R  
ERR2516493 R R R R  
ERR2516491 R R R R  
ERR2516628 R R R R  
ERR2516546 R R R R  
ERR2516476 R R R S  
ERR2516508 R R R R  
ERR2516636 R R R R  
ERR2516501 R R R R  
ERR2516529 R S R S  
ERR2516480 R R R R  
ERR2516479 R R R S  
ERR2516639 S S S S  
ERR2516487 S S S S  
ERR2516515 S S S S  
ERR2516520 S S S S  
ERR2516565 S S S S  
ERR2516450 S S S S

Supplementary I

ERR2516431 R R R R  
ERR2516619 R R R R  
ERR2516544 R R R R  
ERR2516533 R R R R  
ERR2516620 S S S S  
ERR2516568 R S S S  
ERR2516481 S S S S  
ERR2516440 R R R R  
ERR2516615 R R R S  
ERR2516465 R R S R  
ERR2516457 R R R R  
ERR2516733 R S R R  
ERR2516513 R R R R  
ERR2516668 R R R R  
ERR2516667 R R R R  
ERR2516728 R R R R  
ERR2516723 R R R R  
ERR2516526 R R R S  
ERR2516531 R R R R  
ERR2516400 R R R R  
ERR133841 R S S S  
ERR133842 R R R S  
ERR067603 R R R R  
ERR133844 R R R S  
ERR067609 R R S S  
ERR067610 R S S S  
ERR133846 S S S S  
ERR234598 R R R S  
ERR234606 R S R S  
ERR234614 R R R R  
ERR133847 S S S S  
ERR067606 S S S S  
ERR234622 R R R R  
ERR067612 R S S R  
ERR067587 R R S S  
ERR133849 R R S R  
ERR067692 R R R S  
ERR067693 S S S S  
ERR067694 R R S S  
ERR117451 S S S S  
ERR133850 S S S S  
ERR158616 R R R R  
ERR133851 S S S S  
ERR234630 R R R R  
ERR234638 S S S S  
ERR067695 R R S S  
ERR133852 S R S S  
ERR067696 R R S S  
ERR067697 R R S R  
ERR067735 R S S S  
ERR067736 S S S S  
ERR067737 S S S S  
ERR067740 S S S S

Supplementary I

ERR234646 R R S S  
ERR133854 R R R S  
ERR067724 R R S R  
ERR234559 S S S S  
ERR133855 R R S S  
ERR133856 R S S S  
ERR067624 R R S S  
ERR133857 S S S S  
ERR2516686 R R R R  
ERR2516578 R R R R  
ERR2516504 R R R R  
ERR133858 R R R S  
ERR133859 S S S S  
ERR067588 R R S S  
ERR067589 S S S S  
ERR067590 R R R R  
ERR133860 R R S S  
ERR067742 R R S S  
ERR067743 S S S S  
ERR067744 R R S S  
ERR067745 R S S S  
ERR234575 R S S R  
ERR067725 S S S S  
ERR067726 S S S S  
ERR133862 R S S S  
ERR133863 S S S S  
ERR133864 S S S S  
ERR133865 R S S S  
ERR067727 S S S S  
ERR067625 R R R S  
ERR234599 S S S S  
ERR234607 R R S R  
ERR067627 R R S R  
ERR067748 R R S S  
ERR067750 R R R R  
ERR067751 S S S R  
ERR133866 R R S S  
ERR067591 R R R S  
ERR067630 R R R S  
ERR234623 R R S S  
ERR234631 R R S S  
ERR067631 R R S S  
ERR234639 R R R R  
ERR234647 S S S S  
ERR234560 R R R S  
ERR067753 S S S S  
ERR067754 R R S S  
ERR133868 R R S S  
ERR234576 R R R S  
ERR133870 S S S S  
ERR067757 S S S S  
ERR133871 S S S S  
ERR067728 R R S S

Supplementary I

ERR067758 R R R S  
ERR067759 R S S S  
ERR067761 R R S S  
ERR067762 R R S S  
ERR067592 R R S R  
ERR133872 S S S S  
ERR133873 R R S R  
ERR067594 R R R R  
ERR133874 S S S S  
ERR234584 R R R R  
ERR133875 S S R S  
ERR133876 S S S S  
ERR133877 S S R S  
ERR133878 R R R R  
ERR133879 R R R R  
ERR133880 R R S R  
ERR133881 S R S S  
ERR133882 S R S S  
ERR133883 S S S S  
ERR234600 R R R R  
ERR234608 R R S S  
ERR067729 S S S S  
ERR234616 R R S S  
ERR067730 S S S S  
ERR067731 S S S S  
ERR234624 R S S S  
ERR067732 R S R R  
ERR133885 R R R S  
ERR067763 S S S S  
ERR133886 R R S S  
ERR067765 R R S S  
ERR067733 R R S S  
ERR234640 S S S S  
ERR234648 R R S S  
ERR067604 S S S R  
ERR133888 R R R S  
ERR133889 R R R S  
ERR133890 R R S S  
ERR133891 S S S S  
ERR133892 R R R U  
ERR133893 S S S S  
ERR117452 R R S S  
ERR234561 S S S R  
ERR234569 R S S S  
ERR234577 R S S S  
ERR133895 R R S S  
ERR067595 S S S S  
ERR234585 R S S S  
ERR133896 R R S S  
ERR133897 S S S S  
ERR067734 S S S S  
ERR234593 R R S S  
ERR067613 R R S S



Supplementary I

ERR117453 R R S S  
ERR067766 S S S S  
ERR067596 R S S S  
ERR234609 R R R S  
ERR133898 S S S S  
ERR067599 R R R S  
ERR234617 S S S S  
ERR234633 R R R S  
ERR234641 R R S S  
ERR234649 R R S R  
ERR234562 R R R S  
ERR133899 R R R S  
ERR234570 R R S S  
ERR234578 S S S S  
ERR234586 S S S S  
ERR234594 R R S S  
ERR234602 U R S S  
ERR234610 R R S S  
ERR234618 R R R S  
ERR133900 R R R R  
ERR133901 R R R S  
ERR133902 R R S S  
ERR133903 R R R R  
ERR133904 S S S S  
ERR234634 S S R S  
ERR133905 S R S S  
ERR234642 S S S S  
ERR133906 R R R R  
ERR133907 R R R S  
ERR133908 R R R R  
ERR133909 R R S R  
ERR133911 R S S S  
ERR117454 R R S R  
ERR108455 R R S R  
ERR133912 S S S S  
ERR133913 R S S S  
ERR133914 R R R R  
ERR108456 S S S S  
ERR133915 R R S R  
ERR108457 R S R R  
ERR133917 R R S S  
ERR234650 R S R S  
ERR117455 S S S S  
ERR133919 R R R S  
ERR133920 S S S S  
ERR133921 R R R S  
ERR133922 R R S S  
ERR133924 R S S S  
ERR133925 S S S S  
ERR133926 S S S S  
ERR108467 R R R S  
ERR108468 S S S S  
ERR108469 R R R S

Supplementary I

ERR133929 S S S S  
ERR133930 R R S S  
ERR133932 S S S S  
ERR108470 S S S S  
ERR133934 S S S S  
ERR133935 R R R S  
ERR133937 R R S S  
ERR133938 S S S S  
ERR133939 S S S S  
ERR133941 S S S S  
ERR133942 R R R R  
ERR133944 R R S S  
ERR2516390 R R R U  
ERR2516344 R R R U  
ERR2516291 R R R R  
ERR2516176 R R R U  
ERR2516320 R R R U  
ERR2516249 R R R U  
ERR2516359 R R R U  
ERR2516237 R R R U  
ERR2516232 R R R U  
ERR2516229 R R R U  
ERR2516327 R R R S  
ERR2516325 R R S S  
ERR2516330 R R R S  
ERR2516387 R R R R  
ERR133945 R S S R  
ERR133946 S R S S  
ERR067647 R R S S  
ERR067649 R R S S  
ERR067650 R R S S  
ERR067651 R R R S  
ERR133947 S R S S  
ERR133948 S S S S  
ERR133949 S S S S  
ERR133950 S S S S  
ERR133951 R R R R  
ERR133952 S S S S  
ERR133953 R R R S  
ERR133954 R R R R  
ERR067653 R R R S  
ERR067654 R R R U  
ERR067655 R R S S  
ERR067656 R R S S  
ERR067657 R R S S  
ERR133955 R S S S  
ERR067658 S S S S  
ERR067659 R R S S  
ERR067660 R R S R  
ERR067661 R S S S  
ERR067663 R R R S  
ERR067664 S S S S  
ERR067665 R R R R

Supplementary I

ERR067666 S S S S  
ERR067667 R R R S  
ERR067636 R S S R  
ERR067637 S S S S  
ERR117457 S S S S  
ERR108439 R R R S  
ERR133958 S S S S  
ERR133959 R R S S  
ERR108440 S S S S  
ERR133961 R S S S  
ERR108441 S S S S  
ERR133962 R R R R  
ERR133963 R S S S  
ERR133964 S S S S  
ERR133965 S S S S  
ERR108442 S S S S  
ERR234563 R R S R  
ERR108458 R R S S  
ERR133966 R R S S  
ERR2516271 R R R S  
ERR2516255 R R R R  
ERR2516208 R R R S  
ERR2516217 R R R R  
ERR2516219 R R S S  
ERR2516183 R R R R  
ERR2516329 R R R R  
ERR2516266 R R R S  
ERR2516256 R R R R  
ERR2516297 R R R U  
ERR2516190 R R S U  
ERR2516282 R R R U  
ERR2516399 R R R R  
ERR2516182 S S S R  
ERR2516209 R R R R  
ERR2516391 R R R R  
ERR2514755 S S S S  
ERR2513494 S S S S  
ERR2514614 S S S S  
ERR2513918 S S S S  
ERR2514870 S S S S  
ERR2514914 S S S S  
ERR2512632 S S S S  
ERR2513684 S S S S  
ERR2513909 S S S S  
ERR2513079 S S S S  
ERR2513945 S S S S  
ERR2514099 S S S S  
ERR2514251 S S S S  
ERR2514988 S S S U  
ERR2514589 S S S S  
ERR2514009 S S S S  
ERR2512935 S S S S  
ERR2513802 S S S S

Supplementary I

ERR2512736 S S S S  
ERR2515076 S S S S  
ERR2515046 S S S S  
ERR2513228 S S S S  
ERR2514021 R S S S  
ERR2514587 S S S S  
ERR2513920 S S S S  
ERR2513805 S S S S  
ERR2513002 S S S S  
ERR2514824 S S S S  
ERR2514886 R S S S  
ERR2514158 S S S S  
ERR2514618 R S S S  
ERR2513914 R S S S  
ERR2512851 U S S S  
ERR2514432 S S S S  
ERR2513854 S S S S  
ERR2513784 R S S S  
ERR2513154 S S S S  
ERR2514420 S S S S  
ERR2514190 R S S S  
ERR2512957 S S S S  
ERR2514687 S S S S  
ERR2512787 S S S S  
ERR133967 S S S S  
ERR133968 R S S S  
ERR133969 R S S S  
ERR067668 R R R R  
ERR133970 R S S R  
ERR067670 R S S S  
ERR067671 R R R S  
ERR133971 S S S S  
ERR067672 R R S S  
ERR067673 R R S S  
ERR117458 S S S S  
ERR133973 S S S S  
ERR133974 S S S S  
ERR117460 R R R S  
ERR067639 R R R R  
ERR067640 S S S S  
ERR067641 R R S R  
ERR133975 R S S S  
ERR067643 R R R S  
ERR067644 R R R R  
ERR067645 R R S S  
ERR067674 R R R S  
ERR067675 S S S S  
ERR067635 R R S S  
ERR133977 R S S S  
ERR108473 R R S S  
ERR133978 S S S S  
ERR108474 R R S R  
ERR108475 R R R S

Supplementary I

ERR108478 S S S S  
ERR108479 S S S S  
ERR108480 R R R R  
ERR108481 S S S S  
ERR108482 R R S S  
ERR108483 S S S S  
ERR133979 S S S S  
ERR133980 R S S S  
ERR2516251 R R R U  
ERR2516186 R R R S  
ERR2516285 R R R R  
ERR2516367 R R R R  
ERR2516226 R R R R  
ERR2516280 R R R U  
ERR2516356 R R S S  
SRS935938 SRP058221 R R S U  
SRS935937 SRP058221 R R R U  
SRS935948 SRP058221 R R S U  
SRS935959 SRP058221 R R S U  
SRS935967 SRP058221 R R S U  
SRS935986 SRP058221 R R R U  
SRS935999 SRP058221 R R R U  
SRS936002 SRP058221 R R S U  
SRS936026 SRP058221 R R R U  
SRS936040 SRP058221 R R S U  
SRS935936 SRP058221 R R R U  
SRS935926 SRP058221 R R S U  
SRS935941 SRP058221 R R R U  
SRS935956 SRP058221 R R S U  
SRS935955 SRP058221 R R R U  
SRS935954 SRP058221 R R R U  
SRS935953 SRP058221 R R S U  
SRS935952 SRP058221 R R R U  
SRS935951 SRP058221 R R R U  
SRS935950 SRP058221 R R R U  
SRS935949 SRP058221 R R R U  
SRS935947 SRP058221 R R R U  
SRS935966 SRP058221 R R R U  
SRS935957 SRP058221 R R R U  
SRS935964 SRP058221 R R S U  
SRS935965 SRP058221 R R S U  
SRS935962 SRP058221 R R R U  
SRS935961 SRP058221 R R R U  
SRS935963 SRP058221 R R R U  
SRS935958 SRP058221 R R R U  
SRS935960 SRP058221 R R S U  
SRS935976 SRP058221 R R S U  
SRS935975 SRP058221 R R R U  
SRS935974 SRP058221 R R S U  
SRS935973 SRP058221 R R S U  
SRS935972 SRP058221 R R R U  
ERR2513880 R R R S  
ERR2512421 S S S S

Supplementary I

ERR2513896 S S S S  
ERR2512522 S S S S  
ERR2514255 S S S S  
ERR2514198 S S S S  
ERR2512926 U U U S  
ERR2512573 S S S S  
ERR2514640 S S S S  
ERR2512531 S S S S  
ERR2513260 S S S S  
ERR2515052 S S S S  
ERR2514293 R S S S  
ERR2514777 S S S S  
ERR2514332 S S S S  
ERR2514249 S S S S  
ERR2512696 S S S S  
ERR2514991 S S S S  
ERR2513352 R R R R  
ERR2514641 S S S S  
ERR2514284 S S S S  
ERR2514482 S S S S  
ERR2513269 S S S S  
ERR2514656 S S S S  
ERR2514662 S S S S  
ERR2199740 ERR2199741 S S S S  
ERR2199742 S S S S  
ERS458164 S S S S  
ERS457923 R S R S  
ERS457837 S S S S  
ERR551085 S S S S  
ERR2199743 S S S S  
ERR2199744 S S S S  
ERR2199745 S S S S  
ERR551223 S S S S  
ERR552204 S S S S  
ERR551150 S S S S  
ERR553349 R S S S  
ERR2199746 S S S S  
ERR552113 R R R R  
ERR552505 S S S S  
ERR552942 S S S S  
ERR552440 S S S S  
ERR550646,ERR550647,ERR550645 R R S R  
ERR552659 S S S S  
ERR551166 R R R R  
ERR2199748 ERR552077 R R R R  
ERR2199749 S S S U  
ERR498373,ERR498374 S S S S  
ERR133981 R R R S  
ERR2199750 ERR2199751 ERR553354 R R R R  
ERR108485 R R S S  
ERR551858 S S S S  
ERR550975 S S S S  
ERR552676 S S S S

Supplementary I

ERR551751 S S S S  
ERR552249 S S S S  
ERR2199752 ERR2199753 S S S S  
ERR133982 R R S S  
ERR108486 S S S S  
ERR2199754 S S S S  
ERS457959 S S S S  
ERS457317 S S S S  
ERS458356 S S S S  
ERR552232 S S S S  
ERR552845 S S S S  
ERR552813 S S S S  
ERR553054 S S S S  
ERR2199755 ERR2199756 S S S S  
ERR551932 S S S S  
ERR553379 S S S S  
ERR553296 S S S S  
ERR550955 S S S S  
ERR551839 S S S S  
ERR108487 S S S S  
ERR552984 S S S S  
ERR552619 ERR552620 ERR552621 ERR552622 S S S U  
ERR552295 ERR552296 R R R U  
ERR2199757 ERR552496 R R R R  
ERR552875 ERR552876 ERR552877 ERR552878 R R R R  
ERR108488 R R S R  
ERR2199758 ERR2199759 ERR551523 S R S S  
ERR108489 R R S S  
ERR551652 S S S S  
ERR2199760 ERR2199761 S S S S  
ERR552019 S S S S  
ERR551507 S S S S  
ERS457396 R R R S  
ERS457075 R S R S  
ERR553140 S S S S  
ERR552371 S S S S  
ERR551276 S S S S  
ERR551313 S S S S  
ERR2199762 ERR2199763 R R S S  
ERR551836 S S S S  
ERR108490 S S S S  
ERR551508 S S S S  
ERR551803 S S S S  
ERR2199764 ERR2199765 S S S S  
ERR133983 S S S S  
ERR550653 S S S S  
ERR551257 S S S S  
ERR552941 S S S S  
ERR2199766 ERR2199767 ERR552118 R U R R  
ERR552405 R R R R  
ERR552672 R R R R  
ERR552253 ERR552254 R R R R  
ERR551231 R R S S

Supplementary I

ERR552502 S S S S  
ERR553196 S S S S  
ERR552220 S S S S  
ERR552736 S S S S  
ERR108492 S S S S  
ERR553076 S S S S  
ERR550698 R S S S  
ERR2199769 S S S S  
ERR2199770 S S S S  
ERR133984 R R R R  
ERR552238,ERR552239,ERR552240 R R R R  
ERR551178 S S S S  
ERR108420 R R R S  
ERR551716 S S S S  
ERR552273 R R R R  
ERR551246 R R R U  
ERR551319 R R R R  
ERR2199771 S S S U  
ERS458617 S R S S  
ERR551697,ERR551698 R R R R  
ERR550887,ERR550886 R R R S  
ERR108421 R R R R  
ERR552906,ERR552907 R R R R  
ERR551138,ERR551137 R R R R  
ERR552051 S S S S  
ERR550923,ERR550922 R R R R  
ERR553217,ERR553218 R R R R  
ERR550764 R R S R  
ERR552200,ERR552199 R R S R  
ERR552377,ERR552376 R R R S  
ERR551489 S S S S  
ERR108422 R R S R  
ERR552104,ERR552103 R R R R  
ERR551095 S S S S  
ERR2199772 S S S S  
ERR552886 S S S S  
ERR133985 R S S S  
ERR550701 S S S S  
ERR552898 S S S S  
ERR552363,ERR552362,ERR552364 R R S S  
ERR551846 S S S S  
ERR553350 R R R S  
ERR552050 S S S R  
ERR551269 S S S S  
ERR2199773 S S S S  
ERR552320 S S S S  
ERR551538 S S S S  
ERR552846 S S S S  
ERR2199776 S S S S  
ERR2199774 ERR2199775 S S S U  
ERR108423 R S S R  
ERR551468,ERR551469 R R R S  
ERR553138 S S S S



Supplementary I

ERR552317 S S S S  
ERR108425 R R S S  
ERR108426 R R R S  
ERR551900 S S S S  
ERR108427 S S S S  
ERR2199777 S S S S  
ERR551462 R S S S  
ERR552870 R U R R  
ERR552074 ERR552075 R R R U  
ERR133987 S S S S  
ERR553056 S S S S  
ERR551294 S S S S  
ERR108428 R R R S  
ERR108429 R S S S  
ERR553194,ERR553195 R R R R  
ERR553153,ERR553152 R R R S  
ERR553139 R R S S  
ERR550650 S S S S  
ERR551638,ERR551637 R R R S  
ERR552586,ERR552585 R R R R  
ERR551927 ERR551928 S S S S  
ERR552982,ERR552983 R R R R  
ERR108443 R R R R  
ERR108444 S S S S  
ERR2199779 R R R R  
ERR108445 S S S R  
ERR2199780 S S S S  
ERR108446 S S S S  
ERR2041682 R R S S  
ERR2199781 S S S S  
ERR133988 S S S S  
ERR2199782 R S S S  
ERR108447 R S S S  
ERR552090 R R S S  
ERR2199783 S S S S  
ERR551266 S S S S  
ERR133989 S S S S  
ERR550997 S S S S  
ERR108448 S S S S  
ERR552591 S S S S  
ERR2041683 R R R S  
ERR550876 S S S S  
ERR2199784 S S S S  
ERR2199785 S S S R  
ERR551479 S S S S  
ERR2199786 R R R R  
ERR2516167 R R R R  
ERR2516263 R R S R  
ERR2516177 R R R R  
ERR2516252 R R S R  
ERR2516377 R R S S  
SRS935971 SRP058221 R R R U  
SRS935970 SRP058221 R R S U

Supplementary I

SRS935969 SRP058221 R R S U  
SRS935968 SRP058221 R R R U  
SRS935994 SRP058221 R R S U  
SRS935993 SRP058221 R R S U  
SRS935992 SRP058221 R R R U  
SRS935991 SRP058221 R R R U  
SRS935990 SRP058221 R R S U  
SRS935989 SRP058221 R R R U  
SRS935988 SRP058221 R R R U  
SRS935987 SRP058221 R R S U  
SRS935978 SRP058221 R R S U  
SRS935977 SRP058221 R R S U  
SRS935985 SRP058221 R R R U  
SRS935984 SRP058221 R R R U  
SRS935979 SRP058221 R R R U  
SRS935983 SRP058221 R R S U  
SRS935982 SRP058221 R R R U  
SRS935981 SRP058221 R R R U  
SRS936010 SRP058221 R R R U  
SRS936009 SRP058221 R R R U  
SRS936008 SRP058221 R R R U  
SRS935998 SRP058221 R R R U  
SRS935997 SRP058221 R R R U  
SRS935996 SRP058221 R R S U  
SRS935995 SRP058221 R R R U  
SRS936007 SRP058221 R R R U  
SRS936006 SRP058221 R R R U  
SRS936000 SRP058221 R R R U  
SRS936005 SRP058221 R R R U  
SRS936004 SRP058221 R R R U  
SRS936003 SRP058221 R R R U  
SRS936029 SRP058221 R R R U  
SRS936028 SRP058221 R R S U  
SRS936027 SRP058221 R R S U  
SRS936016 SRP058221 R R S U  
SRS936015 SRP058221 R R S U  
SRS936014 SRP058221 R R S U  
SRS936013 SRP058221 R R S U  
PRJNA413593 S S R U  
PRJNA413593 S S S S

Supplementary I

PRJNA413593 S S S U  
PRJNA413593 R S S S  
PRJNA413593 R S S S  
PRJNA413593 S S S U  
PRJNA413593 S S S U  
PRJNA413593 R S S S  
PRJNA413593 S S S U  
PRJNA413593 R S S S  
PRJNA413593 S S S U  
PRJNA413593 R S S S  
PRJNA413593 S S S U  
PRJNA413593 R S S S  
PRJNA413593 S S S U  
PRJNA413593 S S S U



Supplementary I

ERR2512720 S S S S  
ERR2513113 R S S S  
ERR2512762 S S S S  
ERR2512482 S S S S  
ERR2513272 S S S S  
ERR2514334 S S S S  
ERR2512478 R S S S  
ERR2513031 S S S S  
ERR2513498 S S S S  
ERR2514969 S S S S  
ERR2513340 S S S S  
ERR2514373 S S S S  
ERR2514040 U S S S  
ERR2513673 S S S S  
ERR2514776 S S S S  
ERR2513668 S S S S  
ERR2514583 S S S R  
ERR2512447 S S S S  
ERR2512962 S S S R  
ERR2513164 S S S S  
ERR2513648 S S S S  
ERR2515038 S S S S  
ERR2515066 S S S S  
ERR2513256 S S S S  
ERR2514035 S S S S  
ERR2513135 S S S S  
ERR2513344 S S S S  
ERR2512684 U S S S  
ERR2513320 S S S S  
ERR2514104 S S S S  
ERR2514469 S S S S  
ERR2514775 S S S S  
ERR2514782 S S S S  
ERR2512430 S S S S  
ERR2513798 S S S S  
ERR2514791 S S S S  
ERR2515100 S S S S  
ERR2514247 S S S S  
ERR2514992 S S S S  
ERR2512742 S S S S  
ERR2514647 S S S S  
ERR2514416 S S S S  
ERR2514374 S S S S  
ERR2513553 S S S S  
ERR2513433 S S S R  
ERR2513580 S S S S  
ERR2513859 S S S S  
ERR2514839 S S S S  
ERR2514538 S S S S  
ERR2513978 S S S S  
ERR2513921 S S S S  
ERR2513725 S S S S  
ERR2514603 S S S S

Supplementary I

ERR2513776 S S S U  
 ERR2513323 S S S S  
 ERR2514380 S S S S  
 ERR2199787 S S S U  
 ERR2041684 R R R S  
 ERR550861 R R R R  
 ERR552720 R R R U  
 ERR2199788 S S S S  
 ERR137191 S S S S  
 ERR552030 R S S S  
 ERR551302 S S S S  
 ERR2199789 S S S S  
 ERR2199790 ERR2199791 S S S S  
 ERR551856 S S S S  
 ERS458701 R S S S  
 ERS458377 S S S S  
 ERR2041685 R R R S  
 ERR551917 S S S R  
 ERR550689 S S S S  
 ERR550878 S S S S  
 ERR2199792 S S S S  
 ERR550820 S S S S  
 ERR2041686 ERR2041687 R R U R  
 ERR553245 S S S S  
 ERR552608 S S S S  
 ERR2199793 ERR553059 R R R R  
 ERR550754 R R R R  
 ERR551739 R R R R  
 ERR553321 R R R R  
 ERR553109 S S S S  
 ERR2199794 S S S S  
 ERR108493 R R R S  
 ERR2199795 R S S S  
 ERR108494 R R R R  
 ERR108495 R R R S  
 ERR2041688 R R R R  
 ERR550877 S S S S  
 ERR551476 S S S S  
 ERR551400 ERR551401 S S S S  
 ERR551703 S S S S  
 ERR551342,ERR551343 R R R R  
 ERR551130,ERR551131 R R R R  
 ERR550651,ERR550652 R R R S  
 ERR553169,ERR553168 R R R R  
 ERR550742 S S S S  
 ERR108496 S S S S  
 ERR552852 S S S S  
 ERR553188,ERR553189,ERR553190 R R R R  
 ERR108497 S S S S  
 ERR2199796 S S S S  
 ERR2041689 R R R R  
 ERR551691 S S S S  
 ERR551498 S S S S

Supplementary I

ERR552292 S S S S  
ERR552334 S S S S  
ERR2199797 S S S S  
ERR2199798 S S S S  
ERR553341 S S S S  
ERR550803 S S S S  
ERR551355 S S S S  
ERR553240 S S S S  
ERR2041690 ERR2041691 R R U R  
ERR551001 S S S S  
ERR551163 S S S S  
ERR551323 S S S S  
ERR553100 S S S S  
ERR550702 S S S S  
ERR552872,ERR552873,ERR552874 R S S S  
ERR2041692 ERR2041693 R R R S  
ERR551756 S S S S  
ERR551473 S S S S  
ERR553257 S S S S  
ERR2199799 R R R S  
ERR551402 S S S S  
ERR553008 S S S S  
ERR550954 S S S R  
ERR137192 R R R R  
ERR2199800 S S S S  
ERR137193 S S S S  
ERR551144 S S S S  
ERR550760 S S S S  
ERR551669 S S S S  
ERR552571,ERR552569,ERR552570 R R R S  
ERR553053 R R R R  
ERR2041694 ERR2041695 R R U R  
ERR551288 S S S S  
ERR553331 S S S S  
ERR552167 S S S S  
ERR137195 S S S S  
ERR2199801 S S S S  
ERR552012,ERR552011 R R R R  
ERR552221 R S S S  
ERR551593 S S S S  
ERR2199802 ERR2199803 S S S S  
ERS457211 S S S S  
ERS457267 S S S S  
ERS458241 R S R S  
ERR137197 R S R S  
ERR552742 S S S S  
ERR551002 S S S S  
ERR551046 S S S S  
ERR551656 S S S S  
ERR552903 S S S S  
ERR552338 S S S S  
ERR137198 R S S S  
ERR067676 S S S S

Supplementary I

ERR552613 S S S S  
ERR2199804 R S S S  
ERR137199 R S S S  
ERR137200 S S S S  
ERR553208 R R R R  
ERR067677 R R S R  
ERR137201 R S S S  
ERR067678 R R S S  
ERR2199806 S S S S  
ERR552438 S S S S  
ERR550789 S S S S  
ERR553307 S S S S  
ERR067679 R R S S  
ERR552525 S S S S  
ERR552114 S S S S  
ERR2516303 R R S S  
ERR2516373 R R R R  
ERR2516198 R R R S  
ERR2516382 R R R R  
ERR2516181 R R R R  
ERR2516361 R R S R  
ERR2516301 R R S S  
ERR2516254 R R S R  
ERR2516333 R R R R  
ERR2516375 R R R S  
ERR2516352 R R R R  
ERR2516289 R R S R  
ERR2516302 R R R R  
ERR2516206 R R R R  
SRS936012 SRP058221 R R R U  
SRS936011 SRP058221 R R S U  
SRS936025 SRP058221 R R S U  
SRS936024 SRP058221 R R R U  
SRS936023 SRP058221 R R R U  
SRS936022 SRP058221 R R R U  
SRS936021 SRP058221 R R R U  
SRS936020 SRP058221 R R S U  
SRS936019 SRP058221 R R S U  
SRS936018 SRP058221 R R S U  
SRS936017 SRP058221 R R R U  
SRS936041 SRP058221 R R S U  
SRS936039 SRP058221 R R R U  
SRS936038 SRP058221 R R R U  
SRS936037 SRP058221 R R R U  
SRS936036 SRP058221 R R R U  
SRS936033 SRP058221 R R S U  
SRS936032 SRP058221 R R S U  
SRS936031 SRP058221 R R R U  
PRJNA413593 S S S U  
PRJNA413593 R S S R  
PRJNA413593 S S S U  
PRJNA413593 S S S U  
PRJNA413593 S S S U







Supplementary I

PRJNA413593 S S S U  
PRJNA413593 R R S R  
PRJNA413593 S S S U  
PRJNA413593 R S S S  
PRJNA413593 S S S U  
PRJNA413593 R S S S  
ERR2512747 S S S S  
ERR2512816 S S S S  
ERR2514506 S S S S  
ERR2512515 S S S S  
ERR2514188 R S S S  
ERR2513293 S S S S  
ERR2515092 S S S S  
ERR2515057 S S S S  
ERR2513944 S S S S  
ERR2513206 S S S S  
ERR2513963 S S S S  
ERR2514110 S S S S  
ERR2514466 S S S S  
ERR2513867 S S S S  
ERR2514510 S S S S  
ERR2513552 S S S S  
ERR2513373 S S S S  
ERR2513697 S S S S  
ERR2514452 S S S S  
ERR2512988 S S S S  
ERR2514453 S S S S  
ERR2513463 S S S S  
ERR2513326 S S S S  
ERR2512925 S S S S  
ERR2512772 S S S S  
ERR2513816 S S S S  
ERR2514903 S S S S  
ERR2513962 S S S S  
ERR2514963 R S S S  
ERR2513719 S S S S  
ERR2514932 S S S S  
ERR2513186 S S S S

Supplementary I

ERR2513760 S S S S  
ERR2515049 S S S S  
ERR2513698 S S S S  
ERR2514890 S S S S  
ERR2512654 S S S S  
ERR2513341 S S S S  
ERR2514225 S S S S  
ERR2513586 S S S S  
ERR2514620 S S S S  
ERR2514309 S S S S  
ERR2514975 S S S S  
ERR2514921 S S S S  
ERR2514828 S S S S  
ERR2514180 S S S S  
ERR2514144 S S S R  
ERR2513993 S S S S  
ERR2514229 S S S S  
ERR2513096 S S S S  
ERR2514236 S S S S  
ERR2513422 S S S S  
ERR2513893 S S S S  
ERR2513022 S S S S  
ERR2513513 S S S S  
ERR2514746 S S S S  
ERR2514936 S S S S  
ERR2513457 S S S S  
ERR2514066 S S S S  
ERR2512435 S S S S  
ERR2514600 S S S S  
ERR2513074 S S S S  
ERR2514208 S S S S  
ERR2514520 S S S S  
ERR2513677 S S S S  
ERR2513651 S S S S  
ERR2512579 S S S S  
ERR2514396 S S S S  
ERR2513339 S S S S  
ERR2512466 S S S S  
ERR2514697 S S S S  
ERR2513034 S S S R  
ERR2512711 S S S S  
ERR2513452 S S S S  
ERR2513765 S S S S  
ERR2515045 S S S S  
ERR2514023 S S S S  
ERR2513161 S S S S  
ERR2513556 S S S S  
ERR2514480 S S S S  
ERR2514900 S S S S  
ERR2513077 S S S S  
ERR2514946 S S S S  
ERR2514804 S S S S  
ERR2515000 S S S S

Supplementary I

ERR2513891 S S S S  
ERR2514044 S S S S  
ERR2514177 S S S S  
ERR2514113 S S S S  
ERR2514554 S S S S  
ERR2513492 S S S S  
ERR2512385 S S S S  
ERR2514872 S S S S  
ERR2514359 S S S S  
ERR2514072 S S S S  
ERR2514473 S S S S  
ERR2514704 S S S S  
ERR2514680 S S S S  
ERR2514323 S S S S  
ERR2514818 S S S S  
ERR2515086 S S S S  
ERR2514220 S S U S  
ERR2512386 S R S S  
ERR2515030 S S S S  
ERR2512387 S S S S  
ERR2514701 S S S S  
ERR2514500 S S S S  
ERR2514684 S S S S  
ERR2513058 S S S S  
ERR2514195 S S S S  
ERR2513350 S S S S  
ERR2512388 S S S S  
ERR2513368 S S S S  
ERR2514549 S S S S  
ERR2514122 S S S S  
ERR2513952 S S S S  
ERR2512389 S S S S  
ERR2514280 S S S S  
ERR2513620 S S S S  
ERR2513212 S S S S  
ERR2514461 S S S S  
ERR2513749 S S S S  
ERR2514020 S S S S  
ERR2514716 S S S S  
ERR2512390 S S S S  
ERR2514145 S S S S  
ERR2514058 S S S S  
ERR2513822 S S S S  
ERR2512534 S S S S  
ERR2512666 S S S S  
ERR2514971 S S S S  
ERR2514770 S S S S  
ERR2514143 S S S S  
ERR2514186 S S S S  
ERR2513544 R S S S  
ERR2513799 S S S S  
ERR2514527 S S S S  
ERR2515012 S S S S

Supplementary I

ERR2514312 S S S S  
ERR2512438 S S S S  
ERR2514719 S S S S  
ERR2515015 S S S S  
ERR2512391 R S S S  
ERR2512392 S S S S  
ERR2514371 S S S S  
ERR2513786 R R R R  
ERR2512793 S S S S  
ERR2512393 S S S S  
ERR2512394 S S S S  
ERR2514000 S S S S  
ERR2514349 S S S S  
ERR2512979 R R R R  
ERR2512784 S S S S  
ERR2514882 S S S S  
ERR2512891 S S S S  
ERR2515054 S S S S  
ERR2512583 S S S S  
ERR2512920 S S S S  
ERR2513466 S S S S  
ERR2514616 S S S S  
ERR2514835 S S S S  
ERR2513102 S S S S  
ERR2514407 S S S S  
ERR2512539 S S S S  
ERR2513370 S S S S  
ERR2513374 S S S S  
ERR2513479 S S S S  
ERR2512771 S S S S  
ERR2513083 S S S S  
ERR2514905 S S S S  
ERR2512395 S S S S  
ERR2514187 S S S S  
ERR2514856 S S S S  
ERR2512396 S S S S  
ERR2513014 S S S S  
ERR2513751 S S S S  
ERR2514610 S S S S  
ERR2514884 S S S S  
ERR2514391 S S S S  
ERR2513996 S S S S  
ERR2514166 S S S S  
ERR2514032 S S S S  
ERR2514339 S S S S  
ERR2513214 S S S S  
ERR2514496 S S S S  
ERR2512448 S S S S  
ERR2513057 S S S S  
ERR2512665 S S S S  
ERR2513232 R S S S  
ERR2513548 S S S S  
ERR2515053 S S S S

Supplementary I

ERR2513506 S S S S  
ERR2512562 S S S S  
ERR2513721 S S S S  
ERR2512397 S S S S  
ERR2514569 S S S S  
ERR2513917 S S S S  
ERR2513158 S S S S  
ERR2512917 S S S S  
ERR2513696 S S S S  
ERR2514402 S S S S  
ERR2512985 S S S S  
ERR2514542 S S S S  
ERR2512809 S S S S  
ERR2512398 S S S S  
ERR2512476 S S S S  
ERR2513455 S S S S  
ERR2515080 S S S S  
ERR2514512 S S S S  
ERR2512839 S S S R  
ERR2514337 S S S S  
ERR2512901 S S S S  
ERR2513085 R S S S  
ERR2513468 S S S S  
ERR2512399 S S S S  
ERR2513515 S S S S  
ERR2513358 S S S S  
ERR2513693 S S S S  
ERR2512593 S S S S  
ERR2514922 S S S S  
ERR2514378 S S S S  
ERR2513355 S S S S  
ERR2515037 S S S S  
ERR2512980 S S S S  
ERR2512813 S S S S  
ERR2515061 S S S S  
ERR2512400 S S S S  
ERR2512713 S S S S  
ERR2512401 S S S S  
ERR2512402 R S S S  
ERR2512807 S S S S  
ERR2513284 S S S S  
ERR2512585 R S S S  
ERR2513781 S S S S  
ERR2514115 S S S S  
ERR2514999 S S S S  
ERR2512569 S S S S  
ERR2515023 S S S S  
ERR2512461 S S S S  
ERR2514598 S S S S  
ERR2515028 S S S S  
ERR2514501 S S S S  
ERR2513685 S S S S  
ERR2514594 S S S S

Supplementary I

ERR2513437 S S S S  
ERR2512462 S S S S  
ERR2512928 S S S S  
ERR2513036 S S S S  
ERR2513524 S S S S  
ERR2514065 S S S S  
ERR2514783 S S S S  
ERR2513928 S S S S  
ERR2513008 S S S S  
ERR2513934 S S S S  
ERR2514930 S S S S  
ERR2512776 S S S S  
ERR2512611 S S S S  
ERR2514976 S S S S  
ERR2512910 S S S S  
ERR2512403 S S S S  
ERR2512782 S S S S  
ERR2512933 S S S S  
ERR2512404 S S S S  
ERR2514007 S S S S  
ERR2512405 S S S S  
ERR2513097 S S S S  
ERR2512458 S S S S  
ERR2514964 S S S S  
ERR2513974 S S S S  
ERR2512588 S S S S  
ERR2513166 S S S S  
ERR2514437 S S S S  
ERR2513435 S S S S  
ERR2514536 R S S S  
ERR2513540 S S S S  
ERR2514033 S S S S  
ERR2514367 S S S S  
ERR2512879 S S S S  
ERR2513870 S S S S  
ERR2514376 S S S S  
ERR2514459 S S S S  
ERR2512551 S S S S  
ERR2513695 S S S S  
ERR2514666 S S S R  
ERR2515056 S S S S  
ERR2513956 S S S S  
ERR2514201 S S S S  
ERR2513499 S S S S  
ERR2514387 S S S S  
ERR2512406 S S S S  
ERR2514242 S S S S  
ERR2513627 S S S S  
ERR2513294 S S S S  
ERR2513888 S S S S  
ERR2512423 S S S S  
ERR2514615 S S S S  
ERR2514199 S S S S



Supplementary I

ERR2514754 S S S S  
ERR2514399 S S S S  
ERR2512794 S S S S  
ERR2513301 S S S S  
ERR2514027 S S S S  
ERR2514347 S S S S  
ERR2513601 S S S S  
ERR2513312 S S S S  
ERR2513584 S S S S  
ERR2513629 S S S S  
ERR2512857 S S S S  
ERR2513456 S S S S  
ERR2514545 S S S R  
ERR2514003 S S S S  
ERR2512498 S S S S  
ERR2514847 S S S S  
ERR2513839 S S S S  
ERR2512439 S S S S  
ERR2512889 S S S S  
ERR2512781 U U U S  
ERR2512407 S S S S  
ERR2513947 S S S S  
ERR2513894 S S S S  
ERR2513211 S S S S  
ERR2513943 S S S S  
ERR2514456 S S S S  
ERR2514206 S S S S  
ERR2512646 S S S S  
ERR2514322 S S S S  
ERR2513654 S S S S  
ERR2512907 R S S S  
ERR2514223 S S S S  
ERR2514874 S S S S  
ERR2512607 S S S S  
ERR2513550 S S S S  
ERR2512876 U U U S  
ERR2514384 S S S S  
ERR2513472 S S S S  
ERR2514631 R S S S  
ERR2512799 S S S S  
ERR2512514 S S S S  
ERR2514901 S S S S  
ERR2514808 S S S S  
ERR2513857 S S S S  
ERR2512659 S S S S  
ERR2514050 S S S S  
ERR2513112 S S S S  
ERR2514320 S S S S  
ERR2514184 S S S S  
ERR2513771 S S S S  
ERR2513915 S S S S  
ERR552384,ERR552383 R R R S  
ERR553368 S S S S

Supplementary I

ERR551692 R R R R  
ERR552061 S S S S  
ERR553052 S S S S  
ERR2199807 S S S U  
ERR2199808 S S S S  
ERR2199809 S S S S  
ERR551660,ERR551659 R R S R  
ERR2199810 S S S S  
ERR552795 S S S S  
ERR550686 S S S S  
ERR2516343 R R R R  
ERR550925 S S S S  
ERR2199812 S S S S  
ERR2199813 ERR2199814 ERR2199815 S S S U  
ERR2199816 S S S S  
ERR137203 S S S S  
ERR551405 S S S S  
ERR137204 R R R R  
ERR550793 S S S S  
ERR137205 R S R S  
ERR551233,ERR551234 R R S S  
ERR552694 S S S S  
ERR552256 S S S S  
ERR2199817 S S S S  
ERR137206 R R S S  
ERR2199818 R R R R  
ERR2199819 S S S S  
ERR137207 S S R S  
ERR552283 ERR552284 S S S S  
ERS458627 S R S R  
ERR137208 R R R R  
ERR137209 R R S R  
ERR137210 R R S S  
ERR2199820 S S S S  
ERR2199821 R S S S  
ERR2199822 S S S S  
ERR2199823 S S S S  
ERR108472 S S S S  
ERR2516287 R S R R  
ERR2516357 R R S S  
ERR2516274 R R S S  
ERR2516270 R R R R  
ERR2516295 R R S S  
ERR2516392 R R S S  
ERR2516364 R R R R  
ERR2516261 R R R R  
ERR2516347 R R S R  
ERR2516365 R R S R  
ERR2516257 R R R S  
ERR2516349 R R R R  
ERR2516166 R R R R  
ERR2516286 R R R S  
ERR2516175 R R S R







Supplementary I

PRJNA413593 S S S U  
ERR2512688 S S S S  
ERR2514258 S S S S  
ERR2513507 S S S S  
ERR2513390 S S S S  
ERR2514077 S S S S  
ERR2513567 S S S S  
ERR2513856 S S S S  
ERR2512408 S S S S  
ERR2512959 S S S S  
ERR2512409 S S S S  
ERR2514919 S S S S  
ERR2514080 S S S S  
ERR2515020 S S S S  
ERR2513202 S S S S  
ERR2512712 S S S S  
ERR2514664 S S S S  
ERR2514286 S S S S  
ERR2512940 S S S S  
ERR2513377 S S S S  
ERR2512908 S S S S  
ERR2514064 S S S S  
ERR2514595 S S S S  
ERR2514713 S S S S  
ERR2513153 R S S S  
ERR2512586 S S S S  
ERR2513549 S S S S  
ERR2514054 S S S S  
ERR2512410 S S S S  
ERR2513461 S S S S  
ERR2512411 S S S S  
ERR2513189 S S S S  
ERR2513331 S S S S  
ERR2512412 S S S S  
ERR2514790 S S S S  
ERR2513347 S S S S  
ERR2514001 R S S S  
ERR2513369 S S S S  
ERR2512843 S S S S  
ERR2514842 R S S S  
ERR2513493 S S S S  
ERR2512451 S S S S  
ERR2514642 S S S S  
ERR2512431 S S S S  
ERR2513824 S S S S  
ERR2514307 S S S S  
ERR2513310 S S S S  
ERR2513234 S S S S  
ERR2514162 S S S S  
ERR2514663 S S S S  
ERR2512801 S S S S  
ERR2512413 S S S S  
ERR2513151 S S S S

Supplementary I

ERR2514042 S S S S  
ERR2514406 S S S S  
ERR2512414 S S S S  
ERR2514507 S S S S  
ERR2514570 S S S S  
ERR2514051 S S S S  
ERR2515008 S S S S  
ERR2514518 S S S S  
ERR2513527 S S S S  
ERR2512509 S S S S  
ERR2512456 R R S S  
ERR2514861 S S S S  
ERR2512670 S S S S  
ERR2513173 S S S S  
ERR2514082 S S S S  
ERR2514262 S S S S  
ERR2512415 S S S S  
ERR2515101 S S S S  
ERR2513881 S S S S  
ERR2513487 S S S S  
ERR2514139 S S S S  
ERR2514029 S S S S  
ERR2512905 S S S S  
ERR2512420 S S S S  
ERR2513634 S S S S  
ERR2513274 S S S S  
ERR2513363 S S S S  
ERR2513325 S S S S  
ERR2514019 S S S S  
ERR2513346 S S S S  
ERR2514127 S S S S  
ERR2513730 R S S S  
ERR2514353 S S S S  
ERR2513858 S S S S  
ERR2514965 S S S S  
ERR2514795 S S S S  
ERR2513241 R R S R  
ERR2513220 S S S S  
ERR2512428 S S S S  
ERR2514911 S S S S  
ERR2513844 S S S S  
ERR2513908 S S S S  
ERR2514438 S S S S  
ERR2513694 S S S S  
ERR2514197 S S S S  
ERR2514543 S S S S  
ERR2514071 S S S S  
ERR2513747 S S S S  
ERR2514958 S S S S  
ERR2513810 S S S S  
ERR2514629 R S S S  
ERR2513120 S S S S  
ERR2513175 S S S S

Supplementary I

ERR2512470 S S S S  
ERR2513585 S S S S  
ERR2513679 S S S S  
ERR2514694 S S S S  
ERR2513845 S S S S  
ERR2513442 S S S S  
ERR2514026 S S S S  
ERR2514202 S S S S  
ERR2514814 S S S S  
ERR2512685 S S S S  
ERR2513811 U U U R  
ERR2512836 S S S S  
ERR2512881 S S S S  
ERR2513288 S S S S  
ERR2514605 S S S S  
ERR2512459 S S S S  
ERR2514827 S S S S  
ERR2514846 S S S S  
ERR2512790 S S S S  
ERR2514871 S S S S  
ERR2515003 S S S S  
ERR2514504 S S S S  
ERR2513659 S S S S  
ERR2512480 S S S S  
ERR2513380 S S S S  
ERR2514085 S S S S  
ERR2512833 S S S S  
ERR2512723 S S S S  
ERR2514517 S S S S  
ERR2512745 S S S S  
ERR2513785 S S S S  
ERR2512488 S S S S  
ERR2513276 S S S S  
ERR2512963 S S S S  
ERR2514025 S S S S  
ERR2512486 S S S S  
ERR2514774 S S S S  
ERR2513402 S S S S  
ERR2514129 S S S S  
ERR2512516 S S S S  
ERR2514016 S S S S  
ERR2513304 S S S S  
ERR2514888 S S S S  
ERR2513329 S S S S  
ERR2514498 S S S S  
ERR2514935 R S S S  
ERR2513213 S S S S  
ERR2514980 S S S S  
ERR2514831 S S S S  
ERR2514577 S S S S  
ERR2512530 S S S S  
ERR2513554 S S S S  
ERR2512668 S S S S



Supplementary I

ERR2513733 S S S S  
ERR2513225 S S S S  
ERR2512521 S S S S  
ERR2512533 S S S S  
ERR2512868 R S S S  
ERR2512968 S S S S  
ERR2512540 S S S S  
ERR2514648 S S S S  
ERR2514265 S S S S  
ERR2513024 S S S S  
ERR2513933 S S S S  
ERR2512680 S S S S  
ERR2513650 S S S S  
ERR2513579 S S S S  
ERR2513639 S S S S  
ERR2514299 S S S S  
ERR2512819 S S S S  
ERR2513510 S S S S  
ERR2514128 S S S S  
ERR2512722 S S S S  
ERR2512547 S S S S  
ERR2513224 R S S S  
ERR2512505 S S S S  
ERR2514669 S S S S  
ERR2512628 S S S S  
ERR2514245 S S S S  
ERR2513804 S S S S  
ERR2513528 S S S S  
ERR2514028 S S S S  
ERR2514773 S S S S  
ERR2514593 S S S S  
ERR2513727 S S S S  
ERR2514850 S S S S  
ERR2512474 S S S S  
ERR2512560 S S S S  
ERR2515004 S S S S  
ERR2514978 S S S S  
ERR2512589 S S S S  
ERR2512597 S S S S  
ERR2514650 S S S S  
ERR2514860 S S S S  
ERR2512823 S S S S  
ERR2513486 S S S S  
ERR2512951 S S S S  
ERR2512616 S S S S  
ERR2513489 S S S S  
ERR2514355 S S S S  
ERR2512620 S S S S  
ERR2514825 S S S S  
ERR2514566 S S S S  
ERR2514588 S S S S  
ERR2512938 S S S S  
ERR2514141 S S S S

Supplementary I

ERR2513445 S S S S  
ERR2512609 S S S S  
ERR2512886 S S S S  
ERR2514153 S S S S  
ERR2513613 S S S S  
ERR2513901 S S S S  
ERR2514989 S S S S  
ERR2512623 S S S S  
ERR2515081 S S S S  
ERR2512758 S S S S  
ERR2512634 S S S S  
ERR2512831 S S S S  
ERR2514984 S S S S  
ERR2512971 S S S S  
ERR2512641 S S S S  
ERR2514341 S S S S  
ERR2514960 S S S S  
ERR2512663 S S S S  
ERR2512854 S S S S  
ERR2513519 S S S S  
ERR2513787 S S S S  
ERR2513885 S S S S  
ERR2512909 S S S S  
ERR2514531 S S S S  
ERR2512673 S S S S  
ERR2514893 S S S S  
ERR2512913 S S S S  
ERR2513290 S S S S  
ERR2513892 S S S S  
ERR2514131 S S S S  
ERR2514763 S S S S  
ERR2515099 R S S S  
ERR2512610 S S S S  
ERR2512542 S S S S  
ERR2514046 S S S S  
ERR2514671 S S S S  
ERR2514168 S S S S  
ERR2512691 R R S U  
ERR2513265 S S S S  
ERR2513846 S S S S  
ERR2512637 S S S S  
ERR2513726 S S S S  
ERR2512635 S S S S  
ERR2512946 S S S S  
ERR2514414 S S S S  
ERR2514034 S S S S  
ERR2514478 S S S S  
ERR2512697 S S S S  
ERR2512999 S S S S  
ERR2514401 S S S S  
ERR2513404 S S S S  
ERR2512902 S S S S  
ERR2513432 S S S S

Supplementary I

ERR2514678 S S S S  
ERR2514994 R S R S  
ERR2513485 S S S S  
ERR2514227 S S S S  
ERR2512469 S S S S  
ERR2514983 R S S S  
ERR2515067 S S S S  
ERR2514568 S S S S  
ERR2512795 S S S S  
ERR2512835 S S S S  
ERR2512695 S S S S  
ERR2512552 S S S S  
ERR2513615 S S S S  
ERR2513094 S S S S  
ERR2513671 U U U S  
ERR2514957 S S S S  
ERR2514571 S S S S  
ERR2512662 S S S S  
ERR2514878 S S S S  
ERR2513874 S S S S  
ERR2514338 S S S S  
ERR2513678 S S S S  
ERR2514997 S S S S  
ERR2512508 S S S S  
ERR2513465 S S S S  
ERR2513511 S S S U  
ERR2513587 S S S S  
ERR2512612 S S S S  
ERR2512992 S S S S  
ERR2515068 S S S S  
ERR2513940 S S S S  
ERR2512727 S S S S  
ERR2513359 S S S S  
ERR2513441 R R R S  
ERR2515019 S S S S  
ERR2513860 S S S S  
ERR2513797 S S S S  
ERR2512740 S S S S  
ERR2513208 S S S S  
ERR2513427 S S S S  
ERR2513599 S S S S  
ERR2512834 S S S S  
ERR2512701 S S S S  
ERR2512997 S S S S  
ERR2515050 S S S S  
ERR2513376 S S S S  
ERR2512491 S S S S  
ERR2512820 S S S S  
ERR2513692 S S S S  
ERR2513157 S S S S  
ERR2514484 S S S S  
ERR2512527 S S S S  
ERR2513111 S S S S

Supplementary I

ERR2512792 S S S S  
ERR2512703 S S S S  
ERR2514257 S S S S  
ERR2513676 S S S S  
ERR2512717 S S S S  
ERR2513259 S S S S  
ERR2515094 R S S S  
ERR2512455 S S S S  
ERR2512576 S S S S  
ERR2513103 S S S S  
ERR2512619 S S S S  
ERR2514388 U U U S  
ERR2514219 S S S S  
ERR2513990 S S S S  
ERR2513889 S S S S  
ERR2514729 R S S S  
ERR2514526 S S S S  
ERR2513736 S S S S  
ERR2513395 S S S S  
ERR2512918 S S S S  
ERR2513525 S S S S  
ERR2512464 S S S S  
ERR2514639 S S S S  
ERR2513049 S S S S  
ERR2514985 S S S S  
ERR2513813 S S S S  
ERR2514499 S S S S  
ERR2513612 S S S S  
ERR2512721 S S S S  
ERR2513353 S S S S  
ERR2512765 S S S S  
ERR2513557 S S S S  
ERR2512648 S S S S  
ERR2513471 S S S S  
ERR2514329 S S S S  
ERR2514876 S S S S  
ERR2512705 S S S S  
ERR2513068 S S S S  
ERR2513115 S S S S  
ERR2513913 S S S S  
ERR2512814 S S S S  
ERR2512561 S S S S  
ERR2514423 S S S S  
ERR2513763 S S S S  
ERR2513575 S S S S  
ERR2513287 S S S S  
ERR2515096 S S S S  
ERR2515018 S S S S  
ERR2513935 S S S S  
ERR2514192 S S S S  
ERR2513190 S S S S  
ERR2514636 S S S S  
ERR2512863 S S S S

Supplementary I

ERR2514434 S S S S  
ERR2514737 S S S S  
ERR2512744 S S S S  
ERR2514966 S S S S  
ERR2512827 S S S S  
ERR2514224 S S S S  
ERR2512896 S S S S  
ERR2514311 S S S S  
ERR2513555 S S S S  
ERR2512563 S S S S  
ERR2512869 S S S S  
ERR2514934 S S S S  
ERR2514918 S S S S  
ERR2513926 S S S S  
ERR2512755 S S S R  
ERR2512927 S S S S  
ERR2512427 S S S S  
ERR2514698 S S S S  
ERR2512966 S S S S  
ERR2514731 S S S S  
ERR2514597 S S S S  
ERR2514799 S S S S  
ERR2515072 R S S S  
ERR2514721 S S S S  
ERR2513714 S S S S  
ERR2512878 R R S R  
ERR2513003 S S S S  
ERR2512840 S S S S  
ERR2513286 S S S S  
ERR2513280 S S S S  
ERR2513081 S S S S  
ERR2514779 S S S U  
ERR2514725 S S S S  
ERR2514271 S S S S  
ERR2512731 S S S S  
ERR2512622 S S S S  
ERR2512888 R S S S  
ERR2513236 S S S S  
ERR2515090 S S S S  
ERR2512950 S S S S  
ERR2514360 S S S S  
ERR2513769 S S S S  
ERR2513414 S S S S  
ERR2513938 S S S S  
ERR2513239 S S S S  
ERR2514909 R S S S  
ERR2512600 R S S S  
ERR2512479 S S S S  
ERR2513474 S S S S  
ERR2512651 S S S S  
ERR2513308 S S S S  
ERR2514264 S S S S  
ERR2514720 S S S S

Supplementary I

ERR2514584 S S S S  
ERR2513614 S S S S  
ERR2512501 S S S S  
ERR2513235 S S S S  
ERR2514996 S S S U  
ERR2512678 S S S S  
ERR2512861 S S S S  
ERR2514611 S S S S  
ERR2512973 S S S S  
ERR2512984 S S S S  
ERR2514114 S S S S  
ERR2514185 S S S S  
ERR2512786 S S S S  
ERR2513865 S S S S  
ERR2514321 S S S S  
ERR2512981 S S S S  
ERR2514254 S S S S  
ERR2513017 S S S S  
ERR2515005 S S S S  
ERR2514464 S S S S  
ERR2512916 S S S S  
ERR2514889 S S S S  
ERR2513899 S S S S  
ERR2513906 S S S S  
ERR2512555 S S S S  
ERR2514212 S S S S  
ERR2514942 S S S S  
ERR2513424 S S S S  
ERR2514625 S S S S  
ERR2513722 S S S S  
ERR2514179 S S S S  
ERR2514607 S S S S  
ERR2513375 S S S S  
ERR2514152 S S S S  
ERR2514465 S S S S  
ERR2514632 R S S S  
ERR2513967 S S S S  
ERR2513277 S S S S  
ERR2513988 S S S S  
ERR2513706 S S S S  
ERR2513482 S S S S  
ERR2514781 S S S S  
ERR2512432 S S S S  
ERR2515058 S S S S  
ERR2513606 S S S S  
ERR2513099 R S S S  
ERR2512426 S S S S  
ERR2514674 S S S S  
ERR2513019 S S S S  
ERR2512998 S S S S  
ERR2513530 S S S S  
ERR2514585 S S S S  
ERR2512874 S S S S

Supplementary I

ERR2512852 S S S S  
ERR2513833 S S S S  
ERR2514031 S S S S  
ERR2514155 R S R S  
ERR2512995 S S S U  
ERR2514707 S S S S  
ERR2514358 S S S S  
ERR2514172 S S S S  
ERR2514134 S S S S  
ERR2514863 S S S S  
ERR2513021 S S S S  
ERR2514532 S S S S  
ERR2514734 S S S S  
ERR2513418 S S S S  
ERR2513028 S S S S  
ERR2512805 S S S S  
ERR2512440 R R S R  
ERR2513033 S S S S  
ERR2514440 S S S S  
ERR2514448 S S S S  
ERR2514169 S S S S  
ERR2513898 R S S S  
ERR2513595 S S S S  
ERR2514079 S S S S  
ERR2514751 S S S S  
ERR2513222 S S S S  
ERR2514419 S S S S  
ERR2514429 S S S S  
ERR2514915 S S S S  
ERR2514931 S S S S  
ERR2514626 S S S S  
ERR2514826 S S S S  
ERR2513035 S S S S  
ERR2513199 S S S S  
ERR2513066 S S S S  
ERR2514844 S S S S  
ERR2514489 S S S S  
ERR2514260 S S S S  
ERR2513132 S S S S  
ERR2513315 S S S S  
ERR2512915 S S S S  
ERR2514519 S S S S  
ERR2514845 S S S S  
ERR2514467 S S S S  
ERR2514868 S S S S  
ERR2512640 S S S S  
ERR2513278 S S S S  
ERR2513105 S S S S  
ERR2514285 S S S R  
ERR2513761 S S S S  
ERR2515073 S S S S  
ERR2515031 S S S S  
ERR2512499 S S S S

Supplementary I

ERR2513616 S S S S  
ERR2513134 S S S S  
ERR2513227 S S S S  
ERR2513675 S S S S  
ERR2512763 S S S S  
ERR2513388 S S S S  
ERR2513791 S U S S  
ERR2512626 S U S S  
ERR2512452 S S S S  
ERR2512710 S S S S  
ERR2512595 R S S S  
ERR2513745 S S S S  
ERR2512565 S S S S  
ERR2513263 S S S S  
ERR2515029 S S S S  
ERR2514670 S S S S  
ERR2514203 S S S S  
ERR2513219 R S S S  
ERR2512506 S S S S  
ERR2513122 R S S S  
ERR2513046 S S S S  
ERR2513281 S S S S  
ERR2514209 S S S S  
ERR2513937 S S S S  
ERR2513282 S S S S  
ERR2512798 S S S S  
ERR2513484 S S S S  
ERR2514004 S S S S  
ERR2513405 S S S S  
ERR2513362 S S S S  
ERR2512671 S S S S  
ERR2512614 S S S S  
ERR2513119 S S S S  
ERR2515043 S S S S  
ERR2513178 S S S S  
ERR2514472 S S S S  
ERR2513047 R S S S  
ERR2515002 S S S S  
ERR2513073 S S S S  
ERR2513444 S S S S  
ERR2513407 S S S S  
ERR2512903 S S S S  
ERR2514987 S S S S  
ERR2513689 S S S S  
ERR2513931 S S S S  
ERR2513156 S S S S  
ERR2513267 R S S S  
ERR2514792 S S S S  
ERR2514967 S S S S  
ERR2514289 S S S S  
ERR2515010 S S S S  
ERR2514865 S S S S  
ERR2512953 S S S S



Supplementary I

ERR2514986 S S S S  
ERR2512845 S S S S  
ERR2514927 S S S S  
ERR2514917 S S S S  
ERR2513855 S S S S  
ERR2514268 S S S S  
ERR2513029 S S S S  
ERR2513095 S S S S  
ERR2514634 S S S S  
ERR2513209 S S S S  
ERR2513703 S S S S  
ERR2512446 S S S S  
ERR2513268 S S S S  
ERR2513215 S S S S  
ERR2514726 S S S S  
ERR2514433 S S S S  
ERR2513226 S S S S  
ERR2514802 S S S S  
ERR2514333 S S S S  
ERR2513570 S S S S  
ERR2512895 S S S S  
ERR2513720 S S S R  
ERR2512424 S S S S  
ERR2514214 S S S S  
ERR2513477 S S S S  
ERR2514324 S S S S  
ERR2515014 U U U S  
ERR2514912 S S S S  
ERR2514892 S S S S  
ERR2513230 S S S S  
ERR2514950 S S S S  
ERR2514939 S S S S  
ERR2513246 S S S S  
ERR2513890 S S S S  
ERR2514970 S S S S  
ERR2513927 S S S S  
ERR2513732 S S S S  
ERR2512502 S S S S  
ERR2513069 S S S S  
ERR2513930 S S S S  
ERR2512567 S S S S  
ERR2514436 S S S S  
ERR2514248 S S S S  
ERR2513249 S S S S  
ERR2514244 R S S S  
ERR2512764 S S S S  
ERR2513174 S S S S  
ERR2513864 S S S S  
ERR2512885 S S S S  
ERR2513475 S S S S  
ERR2513715 S S S S  
ERR2512481 S S S S  
ERR2513623 S S S S

Supplementary I

ERR2512468 U S S S  
ERR2514786 S S S S  
ERR2514596 S S S S  
ERR2513139 S S S S  
ERR2513039 S S S S  
ERR2513997 S S S S  
ERR2513114 S S S S  
ERR2513869 S S S S  
ERR2514163 S S S S  
ERR2512945 S S S S  
ERR2514833 S S S S  
ERR2513252 S S S S  
ERR2512417 S S S S  
ERR2514830 S S S S  
ERR2512652 S S S S  
ERR2513687 S S S S  
ERR2514147 S S S S  
ERR2513958 S S S S  
ERR2513998 R S S S  
ERR2514945 R S S S  
ERR2512865 S S S S  
ERR2514267 R R S S  
ERR2514843 S S S S  
ERR2512887 S S S S  
ERR2512669 S S S S  
ERR2512596 R R S U  
ERR2514089 S S S S  
ERR2513129 S S S S  
ERR2514103 S S S S  
ERR2514132 S S S S  
ERR2513985 S S S S  
ERR2513968 S S S S  
ERR2514156 R S S S  
ERR2514049 S S S S  
ERR2513851 S S S S  
ERR2514336 S S S S  
ERR2513357 S S S S  
ERR2512706 S S S S  
ERR2513012 S S S S  
ERR2513916 S S S S  
ERR2513809 S S S S  
ERR2513503 S S S S  
ERR2513295 R R R U  
ERR2513336 S S S S  
ERR2512707 S S S S  
ERR2512664 S S S U  
ERR2513123 S S S S  
ERR2512759 S S S S  
ERR2513560 S S S S  
ERR2514895 S S S S  
ERR2514762 S S S S  
ERR2512687 S S S S  
ERR2513637 S S S S

Supplementary I

ERR2513821 S S S S  
ERR552266 S S S S  
ERR552501,ERR552500 R R R R  
ERR2199824 ERR2199825 S S S S  
ERR137212 R S S S  
ERR551727,ERR551726 R R R S  
ERR551923,ERR551922 R R R R  
ERR551305,ERR551304 R R R R  
ERR553163,ERR553161,ERR553162 R R S S  
ERR553291 S S S S  
ERR552708,ERR552709 R R R R  
ERR550735,ERR550736 R R R R  
ERR2516313 R R S R  
ERR551409,ERR551410 R R S S  
ERR1768629 R R R R  
ERS458560 R S S S  
ERR2199826 ERR2199827 S S S S  
ERR551268 S S S S  
ERR108503 R R R S  
ERS458209 R R R S  
ERR108504 S S R S  
ERS458677 S S S S  
ERR551368 S S S S  
ERR137213 R S S S  
ERR137214 S S S S  
ERR551934 S S S S  
ERR552062 S S S S  
ERR137215 R R S S  
ERR552831 S S S S  
ERR552459 R S S S  
ERR117470 R R R S  
ERR137216 R S S R  
ERR551327 S S S S  
ERR234595 R S S S  
ERR137218 R R R S  
ERR234603 S S S S  
ERR137220 R R R S  
ERR234619 S S S S  
ERR137221 R S S S  
ERR553238 R R R S  
ERR551916 S S S S  
ERR234627 R R S S  
ERR234635 S S S S  
ERR553065 S S S S  
ERR2199828 S S S S  
ERR137222 R R S S  
ERR137223 R R R S  
ERR137224 S S S S  
ERR552752 S S S S  
ERR2516281 R R R R  
ERR2516308 R R R R  
ERR2516345 R R S R  
ERR2516245 R R R S

Supplementary I

ERR2516336 R R R R  
ERR2516351 R R S S  
ERR2516203 R R S S  
ERR2516321 S S S S  
ERR2516334 S S S S  
ERR2516170 S S S S  
ERR2516283 S S S S  
ERR2516355 S S S S  
ERR2516239 R R R R  
ERR2516213 R R R R  
ERR2516277 S S S S  
ERR2516337 S S S S  
ERR2516233 S S S S  
ERR2516200 S S S S  
ERR2516292 S S S S  
ERR2516393 S S S S  
ERR2516189 S S S R  
ERR2516195 S S S S  
ERR2516169 S S S S  
ERR2516326 S S S S  
ERR2516363 S S S S  
ERR2516215 S S S R  
ERR2516279 S S S S  
ERR2516346 S S S S  
ERR2516264 R R R R  
ERR2516173 S S S S  
ERR2516290 R S S S  
ERR2516310 S S S S  
ERR2516386 S S S S  
ERR2516284 S S S S  
ERR2516398 S S S R  
ERR2516342 S S S S  
ERR2516314 S S S S  
ERR2516201 S S S S  
ERR2516276 S S S S  
ERR2516171 S S S S  
ERR2516191 S S S R  
ERR2516168 S S S S  
ERR2516394 S S S R  
ERR2516385 S S S S  
ERR2516339 S S S R  
ERR2516228 S S S S  
ERR2516350 S S S S  
ERR2516244 S S S S  
ERR2516315 S S S S  
ERR2516366 S S S S  
ERR2516273 S S S R  
ERR2516235 S S S S  
ERR2516379 S S S S  
ERR2516259 S S S S  
ERR2516372 S S S S  
ERR2516323 S S S S  
ERR2516278 S S S S

Supplementary I

ERR2516275 S S S S  
ERR2516204 S S S S  
ERR2516360 S S S S  
ERR2516328 S S S S  
ERR2516376 S S S R  
ERR2516312 S S S S  
ERR2516383 S S S S  
ERR2516267 S S S S  
ERR2516294 S S S S  
ERR2516216 S S S S  
ERR2516223 S S S S  
ERR2516369 S S S S  
ERR2516299 S S S S  
ERR2516172 S S S S  
ERR2516272 S S S S  
ERR2516193 S S S S  
ERR2516370 S S S S  
ERR2516384 S S S S  
ERR2516332 S S S S  
ERR2516224 S S S S  
ERR2516260 S S S S  
ERR2516197 S S S S  
ERR2516348 S S S S  
ERR2516380 S S S S  
ERR2516225 S S S S  
ERR2516248 S S S S  
ERR2516242 S S S S  
ERR2516179 S S S S  
ERR2516236 S S S S  
ERR2516178 R R S S  
ERR2516241 S S S S  
ERR2516212 S S S S  
ERR2516210 S S S S  
ERR2516227 S S S S  
ERR2516362 S S S S  
ERR2516184 S S S S  
ERR2516319 S S S S  
ERR2516205 S S S S  
ERR2516305 S S S S  
ERR2516306 S S S S  
ERR2516293 S S S S  
ERR2516174 S S S S  
ERR2516230 R R R R  
ERR2516218 S S S S  
ERR2516250 S S S S  
ERR2516322 S S S S  
ERR2516194 S S S S  
ERR2516207 S S S R  
ERR2516300 S S S S  
ERR2516316 R R S R  
ERR2516371 S S S S  
ERR2516353 S S S S  
ERR2516269 S S S S

Supplementary I

ERR2516341 S S S S  
ERR2516318 S S S S  
ERR2516246 S S S S  
ERR2516307 S S S R  
ERR2516262 S S S R  
ERR2516335 S S S R  
ERR2516324 S S S S  
ERR2516340 R R R S  
ERR2516258 S S S S  
ERR2516202 S S S S  
ERR2516378 S S S S  
ERR2516388 S S S S  
ERR2516374 S S S S  
ERR2516381 S S S S  
ERR2516238 S S S S  
ERR2516354 S S S S  
ERR2516298 S S S S  
ERR2516234 S S S S  
ERR2516358 S S S S  
ERR2516211 S S S S  
ERR2516268 S S S S  
ERR2516317 S S S S  
ERR2516309 S S S S  
ERR2516247 S S S S  
ERR2516304 S S S S  
ERR2516331 S S S S  
ERR2516231 S S S S  
ERR2516296 S S S S  
ERR2516221 S S S S  
ERR2516180 S S S S  
ERR2516253 S S S S  
ERR2516311 S S S R  
ERR2516265 S S S S  
ERR2516187 S S S S  
ERR2516395 S S S S  
ERR2516185 S S S S  
ERR2516240 S S S S  
ERR2516368 S S S S  
ERR2516222 S S S S  
ERR2516338 R R S R  
ERR2516288 R R R R  
PRJNA413593 S S S U  
PRJNA413593 S S S U







Supplementary I

ERR2512906 S S S S  
ERR2513505 S S S S  
ERR2513162 S S S S  
ERR2512472 S S S S  
ERR2513351 S S S S  
ERR2512810 S S S S  
ERR2514644 S S S S  
ERR2514612 S S S S  
ERR2514313 S S S S  
ERR2513327 S S S S  
ERR2513010 S S S S  
ERR2512844 S S S S  
ERR2513093 S S S S  
ERR2514176 S S S S  
ERR2512760 S S S S  
ERR2513558 S S S S  
ERR2513271 S S S S  
ERR2514693 S S S S  
ERR2514541 S S S S  
ERR2513244 S S S S  
ERR2513741 S S S S  
ERR2513305 S S S S  
ERR2515085 S S S S  
ERR2512605 S S S S  
ERR2514875 S S S S  
ERR2514149 S S S S  
ERR2514820 S S S S  
ERR2513150 S S S S  
ERR2514470 S S S S  
ERR2512746 S S S R  
ERR2514696 S S S S  
ERR2513141 S S S S  
ERR2514879 S S S S  
ERR2514769 S S S S  
ERR2514787 S S S S  
ERR2513480 S S S S  
ERR2512683 S S S S  
ERR2513142 S S S S  
ERR2514062 S S S S  
ERR2512537 S S S S  
ERR2514849 S S S S  
ERR2513960 S S S S  
ERR2512692 S S S S  
ERR2513753 S S S S  
ERR2513314 S S S S  
ERR2515044 S S S S  
ERR2513980 S S S S  
ERR2512475 S S S S  
ERR2513393 S S S S  
ERR2513577 S S S S  
ERR2513110 S S S S  
ERR2513055 S S S S  
ERR2512639 S S S S

Supplementary I

ERR2514015 S S S S  
ERR2513333 S S S S  
ERR2514490 S S S S  
ERR2513823 S S S S  
ERR2512574 S S S S  
ERR2514235 S S S S  
ERR2513818 S S S S  
ERR2514273 S S S S  
ERR2513541 S S S S  
ERR2514449 S S S S  
ERR2512778 S S S S  
ERR2514297 S S S S  
ERR2514581 S S S S  
ERR2514239 S S S S  
ERR2513608 R R S R  
ERR2514637 S S S S  
ERR2512513 S S S S  
ERR2513537 S S S S  
ERR2513128 S S S S  
ERR2513337 S S S S  
ERR2513740 S S S S  
ERR2512894 S S S S  
ERR2513754 S S S S  
ERR2513674 S S S S  
ERR2512649 S S S S  
ERR2513367 S S S S  
ERR2514809 S S S S  
ERR2513372 S S S S  
ERR2512952 S S S S  
ERR2513127 S S S S  
ERR2514096 S S S S  
ERR2514718 S S S S  
ERR2514100 S S S S  
ERR2513979 S S S S  
ERR2513203 S S S S  
ERR2514916 S S S S  
ERR2514736 S S S S  
ERR2512806 S S S S  
ERR2513543 S S S S  
ERR2513382 S S S S  
ERR2512893 S S S S  
ERR2514560 S S S S  
ERR2512690 S S S S  
ERR2514287 S S S S  
ERR2514972 S S S S  
ERR2513118 S S S S  
ERR2512645 S S S S  
ERR2512581 S S S S  
ERR2512996 S S S S  
ERR2513863 S S S S  
ERR2513591 S S S S  
ERR2513602 S S S S  
ERR2514801 S S S S

Supplementary I

ERR2514160 S S S S  
ERR2514447 S S S S  
ERR2512709 S S S S  
SAMN05276505 S S S S  
ERR2512587 S S S S  
ERR2513391 S S S S  
ERR2512729 S S S S  
ERR2514563 S S S S  
ERR2513410 S S S S  
ERR2514221 S S S S  
ERR2513218 R S S S  
ERR2512856 S S S S  
ERR2513330 S S S S  
ERR2512751 S S S S  
ERR2513366 S S S S  
ERR2513644 S S S S  
ERR2514294 S S S S  
ERR2513449 S S S S  
ERR2513060 S S S S  
ERR2514362 U U U S  
ERR2513205 S S S S  
ERR2514523 S S S S  
ERR2512686 S S S S  
ERR2514430 S S S S  
ERR2514363 S S S S  
ERR2513439 S S S S  
ERR2514445 S S S S  
ERR2513887 S S S S  
ERR2515006 S S S S  
ERR2514682 S S S S  
ERR2513191 S S S S  
ERR2512672 S S S S  
ERR2514572 S S S S  
ERR2514386 S S S S  
ERR2513387 S S S S  
ERR2512830 S S S S  
ERR2513147 S S S S  
ERR2512702 S S S S  
ERR2514397 S S S S  
ERR2514331 S S S S  
ERR2514564 R S S S  
ERR2512681 S S S S  
ERR2513086 S S S S  
ERR2512989 S S S S  
ERR2512618 S S S S  
ERR2513545 S S S S  
ERR2513207 S S S S  
ERR2513400 S S S S  
ERR2513196 S S S S  
ERR2513429 S S S S  
ERR2514654 S S S S  
ERR2515074 S S S S  
ERR2514505 S S S S

Supplementary I

ERR2514937 S S S S  
ERR2514586 S S S S  
ERR2514534 S S S S  
ERR2513849 S S S S  
ERR2514314 S S S S  
ERR2513403 S S S S  
ERR2513827 S S S S  
ERR2514047 S S S S  
ERR2513768 S S S S  
ERR2512473 S S S S  
ERR2514094 R S S S  
ERR2512559 S S S S  
ERR2513610 S S S S  
ERR2514492 S S S S  
ERR2512899 S S S S  
ERR2513062 S S S S  
ERR2512803 S S S S  
ERR2513772 S S S S  
ERR2513409 S S S S  
ERR2514405 S S S S  
ERR2514036 S S S S  
ERR2513411 S S S S  
ERR2514282 S S S S  
ERR2513322 S S S S  
ERR2513131 S S S S  
ERR2515084 S S S S  
ERR2512463 S S S S  
ERR2512939 S S S S  
ERR2514382 S S S S  
ERR2513030 S S S S  
ERR2513309 S S S S  
ERR2514573 S S S S  
ERR2515098 R S S S  
ERR2512564 S S S S  
ERR2513198 S S S S  
ERR2512977 S S S S  
ERR2515095 S S S S  
ERR2514883 S S S S  
ERR2515091 S S S U  
ERR2514582 S S S S  
ERR2514383 S S S S  
ERR2513825 S S S S  
ERR2514544 S S S S  
ERR2514370 S S S S  
ERR2514780 S S S S  
ERR2513752 R S S S  
ERR2512617 S S S S  
ERR2512518 S S S S  
ERR2515009 S S S S  
ERR2514785 S S S S  
ERR2512785 S S S S  
ERR2513421 S S S S  
ERR2512603 S S S S

Supplementary I

ERR2514296 S S S S  
ERR2512507 S S S S  
ERR2514732 S S S S  
ERR2514243 S S S S  
ERR2513876 S S S S  
ERR2513040 S S S S  
ERR2515025 S S S S  
ERR2512800 S S S S  
ERR2514951 S S S S  
ERR2513385 S S S S  
ERR2512650 S S S S  
ERR2513136 S S S S  
ERR2513464 S S S S  
ERR2512919 S S S S  
ERR2513777 S S S S  
ERR2514715 S S S S  
ERR2513469 S S S S  
ERR2513197 S S S S  
ERR2513299 S S S S  
ERR2514993 S S S S  
ERR2512676 S S S R  
ERR2513604 S S S S  
ERR2513386 S S S S  
ERR2514392 S S S S  
ERR2514300 S S S S  
ERR2513514 S S S S  
ERR2513279 S S S S  
ERR2515075 S S S S  
ERR2513460 R R R R  
ERR2513807 R S S S  
ERR2513522 S S S S  
ERR2512510 S S S S  
ERR2514189 S S S S  
ERR2513321 S S S S  
ERR2513041 S S S S  
ERR2513446 S S S S  
ERR2513532 S S S S  
ERR2512575 S S S S  
ERR2513562 S S S S  
ERR2514462 S S S S  
ERR2512730 R R R R  
ERR2513188 S S S S  
ERR2512822 S S S S  
ERR2513564 R R S R  
ERR2514052 S S S S  
ERR2514444 S S S S  
ERR2514074 S S S S  
ERR2514458 S S S S  
ERR2512932 S S S S  
ERR2514237 S S S S  
ERR2513583 S S S S  
ERR2513100 S S S S  
ERR2513800 S S S S

Supplementary I

ERR2515024 R S S S  
SAMN05276400 S S S S  
ERR2512930 R R S S  
ERR2514356 S S S S  
ERR2514266 S S S S  
ERR2515033 S S S S  
ERR2512582 R S S S  
ERR2513266 S S S S  
SAMN05276482 S S S S  
ERR2512454 S S S S  
ERR2513660 S S S S  
SAMN05276469 S S S S  
SAMN05276305 S S S S  
ERR2514252 S S S S  
ERR2513192 S S S S  
ERR2513285 S S S S  
ERR2512969 S S S S  
SAMN05276412 S S S S  
ERR2514982 R S S R  
SAMN05276426 S S S S  
SAMN05276431 S S S S  
SAMN05276548 S S S S  
SAMN05276318 S S S S  
SAMN05276556 S S S S  
ERR2512425 S S S S  
SAMN05276450 S S S S  
SAMN05276378 R R S S  
ERR2514894 S S S S  
SAMN05276311 R R R S  
ERR2514800 R S S S  
SAMN05276513 S S S S  
ERR2514940 S S S S  
SAMN05276309 S S S S  
SAMN05276558 S S S S  
ERR2514081 S S S S  
SAMN05276489 S S S S  
ERR2514123 R R R S  
SAMN05276312 R S R R  
ERR2512602 S S S S  
ERR2514463 S S S S  
SAMN05276536 S S S S  
ERR2513453 S S S S  
SAMN05276471 S S S S  
SAMN05276547 S S S S  
ERR2513531 S S S S  
ERR2514417 S S S S  
ERR2513756 S S S S  
ERR2512471 S S S S  
ERR2513253 S S S S  
ERR2514622 S S S S  
ERR2513518 S S S S  
ERR2514295 R S S S  
ERR2514807 S S S S

Supplementary I

ERR2514164 S S S S  
ERR2514279 S S S S  
ERR2514933 S S S S  
ERR2514159 R R S S  
ERR2512942 S S S S  
ERR2513080 S S S S  
ERR2514810 S S S S  
ERR2513759 S S S S  
ERR2514130 S S S S  
ERR2513949 S S S S  
ERR2513624 S S S S  
ERR2514591 U U U S  
ERR2512529 S S S S  
ERR2512956 S S S R  
ERR2513201 S S S S  
ERR2513691 S S S S  
ERR2513838 S S S S  
ERR2514897 S S S S  
ERR2513185 S S S S  
ERR2513649 S S S S  
ERR2513072 S S S S  
ERR2512644 S S S S  
ERR2513247 S S S S  
ERR2513023 S S S S  
ERR2514005 R R S S  
ERR2513551 S S S S  
ERR2514238 S S S S  
ERR2514136 S S S S  
ERR2512647 S S S R  
ERR2513775 S S S S  
ERR2514008 R S S R  
ERR2513987 R R S S  
ERR2514140 S S S S  
ERR2513145 R S S S  
ERR2513792 S S S S  
ERR2514365 S S S S  
ERR2514379 S S S U  
ERR2514906 S S S S  
ERR2514768 S S S S  
ERR2512978 S S S S  
ERR2514524 S S S S  
ERR2514621 S S S S  
ERR2514441 S S S S  
ERR2514784 S S S S  
ERR2513788 S S S S  
ERR2512796 S S S S  
ERR2513053 S S S S  
ERR2514956 S S S S  
ERR2514699 S S S S  
ERR2513992 S S S S  
ERR2514041 S S S S  
ERR2514304 S S S S  
ERR2512982 S S S S

Supplementary I

ERR2514948 S S S R  
ERR2514375 S S S S  
ERR2512675 S S S R  
ERR2513319 S S S S  
ERR2513582 S S S S  
ERR2514101 S S S S  
ERR2514574 S S S S  
ERR2513534 S S S S  
ERR2513729 S S S S  
ERR2514910 S S S S  
ERR2513238 S S S S  
ERR2512873 S S S S  
ERR2513289 S S S S  
ERR2514269 S S S S  
ERR2512777 S S S S  
ERR2514812 S S S S  
ERR2513982 S S S S  
ERR2514955 S S S R  
ERR2513171 S S S S  
ERR2513879 S S S S  
ERR2512580 S S S S  
ERR2512870 R S S S  
ERR2514959 S S S S  
ERR2514651 S S S S  
ERR2514292 S S S S  
ERR2514990 S S S S  
ERR2513365 S S S S  
ERR2514431 S S S S  
ERR2512629 S S U S  
ERR2514805 S S S S  
ERR2513862 S S S S  
ERR2514443 S S S S  
ERR2514060 S S S S  
ERR2512571 S S S S  
ERR2514196 S S S S  
ERR2513148 S S S S  
ERR2512788 S S S S  
ERR2512974 S S S S  
ERR2513667 S S S S  
ERR2515048 S S S S  
ERR2514562 S S S S  
ERR2512859 S S S S  
ERR2513381 S S S S  
ERR2514606 S S S S  
ERR2514468 S S S S  
ERR2513922 S S S S  
ERR2513814 S S S S  
ERR2513973 S S S S  
ERR2512944 S S S S  
ERR2512739 S S S S  
ERR2514483 S S S R  
ERR2514450 S S S S  
ERR2513566 S S S S



Supplementary I

ERR2512419 R R R R  
ERR2514426 S S S S  
ERR2514344 S S S S  
ERR2514672 S S S S  
ERR2513300 S S S S  
ERR2514537 S S S S  
ERR2514302 S S S S  
ERR2512708 S S S S  
ERR2513521 S S S S  
ERR2512591 R R R R  
ERR2513640 S S S S  
ERR2514747 R S S S  
ERR2514133 S S S S  
ERR2513666 S S S S  
ERR2513261 S S S S  
ERR2513739 S S S S  
ERR2513847 S S S S  
ERR2513091 S S S S  
ERR2513037 S S S S  
ERR2515088 S S S S  
ERR2515097 S S S S  
ERR2512584 S S S S  
ERR2514653 S S S S  
ERR2513306 S S S S  
ERR2513090 S S S S  
ERR2514601 S S S S  
ERR2514602 S S S S  
ERR2513635 S S S S  
ERR2513983 S S S S  
ERR2515047 S S S S  
ERR2512824 R S S S  
ERR2512898 S S S S  
ERR2514010 S S S S  
ERR2513075 S S S S  
ERR2513116 S S S S  
ERR2513793 S S S S  
ERR2514530 S S S S  
ERR2514683 S S S S  
ERR2513184 S S S S  
ERR2513636 S S S S  
ERR2512734 S S S S  
ERR2513638 S S S S  
ERR2514232 S S S S  
ERR2512860 S S S S  
ERR2514691 S S S S  
ERR2512627 S S S S  
ERR2514676 S S S S  
ERR2513176 S S S S  
ERR2514428 S S S S  
ERR2512802 R S S S  
ERR2513000 R S R S  
ERR2513167 S S S S  
ERR2514604 S S S S

Supplementary I

ERR2514761 S S S S  
ERR2512719 S S S S  
ERR2515065 S S S S  
ERR2514511 S S S S  
ERR2513643 S S S S  
ERR2512554 S S S S  
ERR2514819 S S S S  
ERR2514497 S S S S  
ERR2514944 S S S S  
ERR2513250 S S S S  
ERR2512761 S S S S  
ERR2513707 S S S S  
ERR2513774 S S S S  
ERR2514211 S S S S  
ERR2513303 S S S S  
ERR2513389 S S S S  
ERR2513170 S S S S  
ERR2512512 S S S S  
ERR2513681 S S S S  
ERR2512853 S S S S  
ERR2513647 S S S S  
ERR2514764 R S S S  
ERR2512884 S S S S  
ERR2512445 S S S S  
ERR2513981 S S S S  
ERR2512766 S S S S  
ERR2512791 S S S S  
ERR2512749 S S S S  
ERR2514630 S S S S  
ERR2513529 S S S S  
ERR2513815 S S S S  
ERR2514404 S S S S  
ERR2513292 S S S S  
ERR2514834 S S S S  
ERR2514853 S S S S  
ERR2513378 S S S S  
ERR2513690 S S S S  
ERR2513038 S S S S  
ERR2513819 R R S S  
ERR2513712 S S S S  
ERR2514627 S S S S  
ERR2513076 S S S S  
ERR2513882 S S S S  
ERR2514439 S S S S  
ERR2514494 S S S S  
ERR2513731 S S S S  
ERR2512986 S S S S  
ERR2513454 S S S S  
ERR2514730 S S S S  
ERR2514742 S S S S  
ERR2512519 S S S S  
ERR2514556 S S S S  
ERR2514493 S S S S

Supplementary I

ERR2513622 S S S S  
ERR2514204 S S S S  
ERR2513596 S S S S  
ERR2513778 S S S S  
ERR2513783 R S S S  
ERR2514093 S S S S  
ERR2512914 S S S S  
ERR2514495 S S S S  
ERR2514645 S S S S  
ERR2513182 S S S S  
ERR2513984 S S S S  
ERR2514759 S S S S  
ERR2513476 S S S S  
ERR2513425 S S S S  
ERR2513379 U U U S  
ERR2513087 S S S S  
ERR2513780 S S S S  
ERR2514486 S S S S  
ERR2514135 S S S S  
ERR2515051 S S S S  
ERR2514226 S S S S  
ERR2514798 S S S S  
ERR2514318 S S S S  
ERR2512768 S S S S  
ERR2513965 S S S S  
ERR2514561 S S S S  
ERR2514471 S S S S  
ERR2513027 R R S S  
ERR2513104 R R S U  
ERR2514121 S S S S  
ERR2514421 S S S S  
ERR2512924 S S S S  
ERR2513939 S S S S  
ERR2512538 S S S S  
ERR2513598 S S S S  
ERR2512489 S S S S  
ERR2513526 S S S S  
ERR2514154 S S S S  
ERR2514816 S S S S  
ERR2512738 S S S S  
ERR2513957 R U S S  
ERR2514675 S S S S  
ERR2513702 S S S S  
ERR2513051 S S S S  
ERR2514385 S S S S  
ERR2512752 R S S S  
ERR2514979 U U U R  
ERR2514056 S S S S  
ERR2512545 S S S S  
ERR2512543 S S S S  
ERR2513829 R S S S  
ERR2513216 S S S S  
ERR2512779 S S S S

Supplementary I

ERR2513316 S S S S  
ERR2513832 S S S S  
ERR2514222 S S S S  
ERR2512718 R R S R  
ERR2512704 S S S S  
ERR2513835 R R R R  
ERR2513711 S S S S  
ERR2512517 S S S S  
ERR2513757 S S S S  
ERR2513143 S S S S  
ERR2513574 S S S S  
ERR2513607 U S S R  
ERR2513609 S S S S  
ERR2513195 S S S S  
ERR2514624 S S S S  
ERR2513946 S S S S  
ERR2513401 R S S S  
ERR2514283 S S S S  
ERR2512815 S S S S  
ERR2514539 S S S S  
ERR2513481 S S S S  
ERR2512832 S S S S  
ERR2515011 S S S S  
ERR2514213 S S S S  
ERR2514372 S S S S  
ERR2514709 S S S S  
ERR2514522 U U U S  
ERR2512965 S S S S  
ERR2512993 R S S S  
ERR2514609 R S S S  
ERR2514194 S S S S  
ERR2513569 S S S S  
ERR2512418 S S S S  
ERR2513853 S S S S  
ERR2512808 U U U S  
ERR2513625 U S S S  
ERR2513163 S S S U  
ERR2514330 S S S U  
ERR2512477 S S S S  
ERR2513826 U U U S  
ERR2514613 S S S S  
ERR2513594 S S S S  
ERR2515021 S S S S  
ERR2514553 S S S S  
ERR2514700 S S S S  
ERR2512535 S S S S  
ERR2513458 S S S S  
ERR2514171 S S S S  
ERR2515064 U U U S  
ERR2515034 S S S S  
ERR2514508 S S S S  
ERR2513013 S S S S  
ERR2512726 S S S S

Supplementary I

ERR2513007 S S S S  
ERR2514867 R R S U  
ERR2513517 U U U S  
ERR2513394 S S S S  
ERR2513547 S S S S  
ERR2512983 S S S S  
ERR2514278 S S S S  
ERR2513392 S S S S  
ERR2514608 S S S S  
ERR2513701 S S S S  
ERR2513770 R R R U  
ERR2512500 U U U S  
ERR2513194 S S S R  
ERR2513886 S S S S  
ERR2514039 S S S S  
ERR2514368 S S S S  
ERR2512679 S S S S  
ERR2513646 S S S S  
ERR2512789 S S S S  
ERR2514182 S S S S  
ERR2513572 U U U S  
ERR2513042 S S S S  
ERR2514457 S S S S  
ERR2514037 S S S S  
ERR2513307 S S S S  
ERR2514753 S S S S  
ERR2514102 S S S S  
ERR2514151 S S S S  
ERR2514117 S S S S  
ERR2514838 S S S S  
ERR137225 R R S R  
ERR137227 R S S S  
ERR137228 R S S S  
ERR137229 R R R R  
ERR2199829 S S S S  
ERR137230 R R R S  
ERR551664 S S S S  
ERR552063 S S S S  
ERR137231 R R R R  
ERR551008 S S S S  
ERR108513 S S S S  
ERR137232 S S S S  
ERR137233 R S R S  
ERR067700 R R R U  
ERR550769 S S S S  
ERR137234 R R S R  
ERR234651 R S R R  
ERR552773 S S S S  
ERR137235 S S S S  
ERR067703 S S S S  
ERR067704 R R R S  
ERR551335 S S S S  
ERR067705 R R S R

Supplementary I

ERR551876 S S S S  
ERR067706 S S S S  
ERR550790 S S S S  
ERR067707 R R R S  
ERR2510189 R R U U  
ERR2510169 S R U U  
ERR2510204 R S U U  
ERR2510200 R S U U  
ERR2510173 R S U U  
ERR2510206 S S U U  
ERR2510143 S S U U  
ERR2510220 S S U U  
ERR2510138 R R U U  
ERR2510177 R S U U  
ERR2510237 R S U U  
ERR2510233 S R U U  
ERR2510211 R R U U  
ERR2510216 R S U U  
ERR2510183 S S U U  
ERR2510186 S S U U  
ERR2510242 R R U U  
ERR2510182 S R U U  
ERR2510203 R S U U  
ERR2510230 R S U U  
ERR2510157 S S U U  
ERR2510240 R S U U  
ERR2510239 S S U U  
ERR2510166 R S U U  
ERR2510212 S R U U  
ERR2510129 R R U U  
ERR2510163 R S U U  
ERR2510226 S R U U  
ERR2510213 R S U U  
ERR2510185 R R U U  
ERR2510210 R S U U  
ERR2510179 R S U U  
ERR2510191 R R U U  
ERR2510175 R R U U  
ERR2510162 R S U U  
ERR2510228 S R U U  
ERR2510209 R S U U  
ERR2510181 R R U U  
ERR067708 S S S S  
ERR067709 R R R R  
ERR067711 R R R S  
ERR551270 S S S S  
ERR551958 S S S S  
ERR067713 S S S S  
ERR2510174 R R U U  
ERR2510142 R S U U  
ERR2510199 R R U U  
ERR2510155 R S U U  
ERR2510227 R S U U

Supplementary I

ERR2510229 S S U U  
ERR2510147 R S U U  
ERR2510193 R S U U  
ERR2510235 R R U U  
ERR2510149 R S U U  
ERR2510130 R S U U  
ERR2510139 R S U U  
ERR2510132 R R U U  
ERR2510156 R S U U  
ERR2510223 R S U U  
ERR2510218 R R U U  
ERR2510133 R R U U  
ERR2510192 R S U U  
ERR2510215 R R U U  
ERR2510158 S S U U  
ERR2510146 R R U U  
ERR2510188 R R U U  
ERR2510224 R R U U  
ERR2510134 R S U U  
ERR2510194 R R U U  
ERR2510184 S R U U  
ERR2510180 R S U U  
ERR2510205 R S U U  
ERR2510198 R S U U  
ERR2510154 R R U U  
ERR2510131 R S U U  
ERR2510167 R R U U  
ERR2510214 S R U U  
ERR2510164 R R U U  
ERR2510150 S R U U  
ERR2510144 R S U U  
ERR2510168 R R U U  
ERR2510172 S R U U  
ERR2510241 R S U U  
ERR2510234 R R U U  
ERR2510208 R S U U  
ERR2510136 R R U U  
ERR2510153 R R U U  
ERR2510201 S R U U  
ERR2510236 R S U U  
ERR2510161 R S U U  
ERR2510135 R R U U  
ERR2510141 S R U U  
ERR2510238 R R U U  
ERR2510145 S R U U  
ERR2510195 S R U U  
ERR2510128 S R U U  
ERR2510151 S S U U  
ERR2510170 R R U U  
ERR2510222 R S U U  
ERR2510231 S R U U  
ERR2510207 R S U U  
ERR2510190 R R U U

Supplementary I

ERR2510159 R R U U  
ERR2510225 R R U U  
ERR2510176 S S U U  
ERR2510217 R R U U  
ERR2510196 R R U U  
ERR2510219 R R U U  
ERR2510178 S S U U  
ERR2510140 R R U U  
ERR2510187 R R U U  
ERR2510160 R R U U  
ERR2510221 R R U U  
ERR2510152 R S U U  
ERR2510232 R R U U  
ERR2510165 R R U U  
ERR2510148 R R U U  
ERR227982 R R R S  
ERR2516196 R R R R  
ERR2516243 R R S R  
ERR2516188 R R R R  
ERR2516199 R R R R  
ERR2516396 R R R R  
ERR2516220 R R S R  
ERR2516397 R R S R  
ERR2516214 R R S R  
PRJNA413593 S S S U  
PRJNA413593 R S S S  
PRJNA413593 R S S S  
PRJNA413593 S S S U  
PRJNA413593 R S S R



Supplementary I

PRJNA413593 S S S U  
PRJNA413593 R S S S  
PRJNA413593 S S S U  
PRJNA413593 R R S R  
PRJNA413593 S S S S  
PRJNA413593 S S S U  
PRJNA413593 S S S U  
PRJNA413593 R R R R  
PRJNA413593 S S S U  
PRJNA413593 S R S S  
PRJNA413593 S S S U  
PRJNA413593 R S S S  
PRJNA413593 S S S U  
PRJNA413593 S S S S  
PRJNA413593 S S S U  
PRJNA413593 S S S U  
PRJNA413593 S S S U  
PRJNA413593 R R S S  
PRJNA413593 S S S U  
PRJNA413593 R S S S  
PRJNA413593 S S S U  
PRJNA413593 S S S U  
PRJNA413593 R S S S  
PRJNA413593 S S S U  
PRJNA413593 S S S U  
PRJNA413593 R S S S  
PRJNA413593 S S S U  
PRJNA413593 S S S U  
PRJNA413593 R S S S  
PRJNA413593 S S S U  
PRJNA413593 S S S U  
PRJNA413593 R R S S  
PRJNA413593 S S S U  
PRJNA413593 S S S U  
PRJNA413593 R S S S  
PRJNA413593 S S S U  
PRJNA413593 S S S U  
PRJNA413593 S S S U

Supplementary I

PRJNA413593 S S S U  
PRJNA413593 R S S S  
PRJNA413593 S S S U  
PRJNA413593 S S S U  
PRJNA413593 R S S S  
PRJNA413593 S S S U  
PRJNA413593 S S S U  
PRJNA413593 S R S S  
PRJNA413593 R S S S  
PRJNA413593 S S S U  
PRJNA413593 S S S U  
PRJNA413593 R S S S  
PRJNA413593 S S S U  
PRJNA413593 S S S U  
PRJNA413593 S S S U  
PRJNA413593 R S S R  
PRJNA413593 S S S U  
PRJNA413593 R S S S  
PRJNA413593 S S S U  
PRJNA413593 R S S S  
PRJNA413593 S S S U  
PRJNA413593 S S S U  
PRJNA413593 R S S S  
PRJNA413593 S S S U  
PRJNA413593 S S S U  
PRJNA413593 R R S R  
PRJNA413593 S S S U  
PRJNA413593 R S S S  
PRJNA413593 R S S S  
PRJNA413593 S S S U  
PRJNA413593 R S S S  
ERR2512949 S S S S  
ERR2513180 S S S S  
ERR2512606 R S S S  
ERR2513335 S S S S  
ERR2514712 S S S S  
ERR2514319 S S S S  
SAMN07659554 S S S S

Supplementary I

ERR2513495 S S S S  
ERR2514424 R S R S  
ERR2513064 S S S S  
SAMN07659036 R S S S  
ERR2514393 S S S S  
ERR2514509 S S S S  
ERR2513905 S S S S  
ERR2513169 S S S S  
ERR2513976 S S S S  
ERR2515035 S S U U  
ERR2512875 S S S S  
ERR2514348 S S S S  
ERR2514340 R S S S  
ERR2514657 S S S S  
ERR2513408 R R R R  
ERR2513488 R S S S  
ERR2514231 S S S S  
ERR2514053 R S S S  
ERR2512490 S S S S  
ERR2514685 S S S S  
ERR2514413 S S S S  
ERR2513459 S S S S  
ERR2513423 S S S S  
ERR2514112 S S S S  
ERR2512821 R S S S  
SAMN07658450 S S S S  
ERR2512700 R R R R  
ERR2512457 S S S S  
ERR2512441 S S S S  
SAMN07658683 S S S S  
ERR2512566 S S S S  
ERR2513349 S S S S  
ERR2512849 S S S S  
ERR2514174 S S S S  
ERR2514533 S S S S  
ERR2513713 S S S S  
ERR2512550 S S S S  
ERR2513311 S S S S  
ERR2513789 R S S S  
ERR2514902 S S S S  
ERR2514947 R S S S  
ERR2514097 S S S S  
ERR2514829 S S S S  
ERR2512890 S S S S  
ERR2513852 R R R S  
ERR2513082 S S S S  
ERR2512578 S S S S  
ERR2512465 S S S S  
ERR2514766 S S S S  
ERR2513873 S S S S  
ERR2512828 S S S S  
ERR2514181 S S S S  
SAMN07658160 S S S S

Supplementary I

SAMN07659677 S S S S  
ERR2513951 S S S S  
ERR2513084 S S S S  
ERR2514855 S S S S  
ERR2513942 S S S S  
ERR2514756 S S S S  
ERR2513734 S S S S  
ERR2513910 S S S S  
ERR2514233 S S S S  
SAMN07659475 S S S S  
ERR2513932 S S S S  
ERR2512754 S S S S  
SAMN07658236 S S S S  
ERR2513059 S S S S  
ERR2512866 S S S S  
ERR2513508 S S S S  
ERR2513699 S S S S  
ERR2514043 S S S S  
ERR2514173 S S S S  
SAMN07660272 S S S S  
ERR2513360 S S S S  
ERR2513618 S S S S  
ERR2513710 R S S S  
ERR2513298 S S S S  
ERR2513324 S S S S  
ERR2514741 S S S S  
ERR2514873 S S S S  
ERR2515016 S S S R  
ERR2514170 S S S S  
ERR2513490 S S S S  
SAMN07658172 S S S S  
ERR2512714 S S S S  
SAMN07658780 S S S S  
ERR2513313 S S S S  
ERR2514317 S S S S  
ERR2513936 S S S S  
ERR2512818 S S S S  
ERR2512532 S S S S  
ERR2514205 S S S S  
ERR2513065 S S S S  
ERR2512958 S S S S  
ERR2514668 S S S S  
ERR2514086 S S S S  
ERR2513245 S S S S  
ERR2513108 S S S S  
ERR2513877 S S S S  
ERR2514877 U U U S  
ERR2514929 R S S S  
ERR2513581 S S S S  
ERR2513152 S S S S  
ERR2513568 S S S S  
ERR2513523 S S S S  
ERR2512613 S S S S

Supplementary I

ERR2513426 S S S S  
SAMN07660336 S S S S  
ERR2512862 S S S S  
ERR2514411 S S S S  
ERR2512674 S S S S  
SAMN07658831 S S S S  
ERR2512495 S S S R  
ERR2514652 S S S S  
ERR2513728 S S S S  
ERR2512594 S S S S  
SAMN07658534 S S U S  
ERR2514516 S S S S  
ERR2513907 S S S S  
ERR2512631 S S S S  
ERR2514111 S S S S  
ERR2514920 S S S S  
SAMN07659521 S S S S  
ERR2513451 S S S S  
ERR2514298 S S S S  
ERR2513600 S S S S  
ERR2513653 S S S S  
ERR2514091 S S S S  
ERR2514425 S S S S  
ERR2513450 S S S S  
ERR2513243 S S S S  
ERR2513428 S S S R  
ERR2514061 S S S S  
ERR2512449 S S S S  
ERR2513808 S S S S  
ERR2514711 S S S S  
ERR2514635 S S S S  
ERR2514024 S S S S  
SAMN07660374 S S S S  
ERR2513502 S S S S  
SAMN07658862 R S S S  
ERR2512838 S S S R  
ERR2514817 S S S S  
ERR2512599 S S S S  
ERR2514661 S S S S  
ERR2513496 S S S S  
ERR2514576 S S S S  
SAMN07658511 S S S S  
ERR2513200 S S S S  
ERR2515078 S S S S  
SAMN07659532 S S S S  
ERR2514724 S S S S  
ERR2512544 R S S S  
ERR2514477 S S S S  
ERR2514565 S S S S  
ERR2514474 S S S S  
ERR2513056 R S R S  
ERR2512661 S S S S  
ERR2513868 S S S S

Supplementary I

ERR2512867 S S S S  
ERR2513242 S S S S  
ERR2513520 S S S S  
ERR2513462 S S S S  
SAMN07658301 S S S S  
ERR2513630 S S S S  
ERR2512757 S S S S  
ERR2513975 S S S S  
ERR2513032 S S S S  
ERR2513254 S S S S  
ERR2514241 S S S S  
SAMN07658467 S S S S  
ERR2514619 S S S S  
ERR2514013 S S S S  
SAMN07659844 S S S S  
SAMN07658342 S S S S  
SAMN07659715 S S S S  
SAMN07660146 S S S S  
SAMN07658363 S S S S  
SAMN07658667 S S S S  
SAMN07659803 S S S S  
SAMN07660208 S S S S  
ERR2514327 R S S S  
SAMN07658969 S S S S  
SAMN07659815 S S S S  
SAMN07658845 S S S S  
SAMN07660234 S S S S  
SAMN07659809 S S S S  
SAMN07658645 S S S S  
SAMN07658153 S S S S  
SAMN07659620 S S S R  
SAMN07660455 S S S S  
SAMN07658821 S S S S  
SAMN07659680 S S S S  
SAMN07659362 S S S S  
SAMN07658690 S S S S  
SAMN07658586 S S S S  
SAMN07659116 S S S S  
SAMN07659995 S S S S  
SAMN07658936 S S S U  
SAMN07659943 R R R U  
SAMN07659075 S S S S  
SAMN07658733 S S S S  
SAMN07658539 S S S S  
SAMN07660461 S S S S  
SAMN07660147 S S S S  
SAMN07660426 S S S S  
SAMN07659676 S S S S  
SAMN07660082 S S S S  
SAMN07660017 S S S S  
SAMN07660206 S S S S  
SAMN07659105 S S S S  
SAMN07658809 S S S S

Supplementary I

SAMN07658424 R S S S  
SAMN07658558 S S S S  
SAMN07658568 S S S S  
SAMN07658510 R R S S  
SAMN07659964 S S S S  
SAMN07659610 S S S S  
SAMN07658775 S S S S  
SAMN07659838 S S S S  
SAMN07660454 S S S S  
SAMN07659329 S S S S  
SAMN07658958 S S S S  
SAMN07658912 S S S S  
SAMN07659808 R S S S  
SAMN07658489 S S S S  
SAMN07659434 S S S S  
SAMN07660190 S S S S  
SAMN07658795 S S S S  
SAMN07658349 S S S S  
SAMN07660178 S S S S  
SAMN07658404 S S S U  
SAMN07659642 S S S S  
SAMN07660069 S S S S  
SAMN07660435 S S S S  
SAMN07658614 S S S S  
SAMN07658208 R S S S  
SAMN07659734 S S S S  
SAMN07660305 R R S S  
SAMN07660157 U S S S  
SAMN07658158 S S S S  
SAMN07659695 R S S S  
SAMN07658848 R S S S  
SAMN07658253 S S S S  
SAMN07658804 S S S U  
SAMN07659787 U U U S  
SAMN07659443 S S S S  
SAMN07658688 S S S S  
SAMN07658901 S S S S  
SAMN07660270 S S S S  
SAMN07660123 S S S S  
ERR2514943 S S S S  
SAMN07658471 S S S S  
ERR2513812 S S S S  
ERR2515059 S S S S  
ERR2514925 S S S S  
ERR2514288 R S R S  
ERR2514275 U U U S  
ERR2513836 S S S S  
ERR2513682 S S S S  
ERR2514191 S S S R  
ERR2514454 S S S S  
ERR2514381 R S S S  
ERR2514063 R S S U  
ERR2513364 S S S S

Supplementary I

SAMN07660286 S S S S  
ERR2513005 S S S S  
SAMN07660300 R R S S  
ERR2513631 R R R U  
ERR2514550 R R S S  
ERR2514107 S S S S  
ERR2513603 S S S S  
SAMN07660217 S S S S  
ERR2512931 S S S R  
ERR2514105 S S S S  
ERR2513419 S S S S  
ERR2513138 S S S R  
ERR2513779 S S S S  
ERR2513923 S S S S  
ERR2512504 S S S S  
ERR2514961 S S S S  
ERR2514896 S S S S  
SAMN07659506 S S S S  
SAMN07660216 S S S S  
ERR2514364 S S S S  
SAMN07660425 S S S S  
SAMN07659632 S S S S  
SAMN07660463 S S S S  
ERR2514690 S S S S  
SAMN07660210 S S S S  
SAMN07658566 S S S S  
SAMN07659451 S S S S  
SAMN07659990 S S S S  
SAMN07659690 S S S S  
SAMN07659761 S S S S  
SAMN07660044 S S S S  
SAMN07658355 S S S S  
SAMN07658237 S S S S  
SAMN07659798 R U S S  
SAMN07660115 R U U R  
SAMN07659972 S S S S  
SAMN07659436 R U S S  
SAMN07660153 S S S S  
SAMN07659952 S S S S  
SAMN07658849 S S S S  
SAMN07660385 R R S U  
SAMN07660055 S S S S  
SAMN07658695 S S S S  
SAMN07660096 S S S S  
SAMN07659458 S S S S  
SAMN07659392 S S S S  
SAMN07658304 S S S S  
SAMN07658397 S S S S  
SAMN07659891 S S S S  
SAMN07660345 R S S U  
SAMN07658395 S S S S  
SAMN07659820 S S S S  
SAMN07658245 S S S S



Supplementary I

SAMN07659775 S S S S  
ERR2513126 R R S R  
SAMN07658244 R S S S  
SAMN07660011 S S S S  
SAMN07658541 S S S S  
SAMN07658156 S S S S  
SAMN07659009 S S S S  
SAMN07658270 S S S S  
SAMN07658486 S S S S  
SAMN07658573 S S S S  
SAMN07659823 S S S S  
SAMN07660103 S S S S  
SAMN07658923 S S S S  
SAMN07658942 S S S S  
SAMN07660440 S S S S  
SAMN07660111 S S S U  
SAMN07658300 S S S S  
SAMN07659988 S S S S  
SAMN07658803 S S S S  
SAMN07658144 R S S S  
SAMN07660074 S S S S  
SAMN07659879 S S S S  
SAMN07660375 S S S S  
SAMN07660373 U U S U  
SAMN07658993 S S S S  
SAMN07659717 R S S S  
SAMN07660326 S S S S  
ERR2514069 S S S S  
SAMN07659826 U S S S  
SAMN07659430 S S S S  
SAMN07658148 S S S S  
SAMN07659706 S S S S  
SAMN07658720 S S S S  
SAMN07659412 S S S S  
SAMN07658167 S S S S  
SAMN07658735 S S S S  
SAMN07658872 S S S U  
SAMN07658368 S S S S  
SAMN07659885 R R S R  
SAMN07659502 S S S S  
SAMN07658155 S S S S  
SAMN07658547 S S S S  
SAMN07659756 S S S S  
SAMN07659387 R S S S  
SAMN07658320 S S S S  
SAMN07659772 S S S S  
SAMN07658878 S S S S  
SAMN07660263 S S S S  
SAMN07660316 R S S S  
SAMN07660358 S S S S  
SAMN07659793 R S S S  
SAMN07659824 S S S S  
SAMN07659100 S S S S

Supplementary I

SAMN07660466 S S S S  
SAMN07658585 S S S S  
SAMN07658618 S S S S  
SAMN07659937 S S S S  
SAMN07659851 S S S S  
SAMN07658723 S S S S  
SAMN07658464 S S S S  
SAMN07659575 S S S S  
ERR2514821 S S S S  
SAMN07660436 S S S S  
ERR2514547 S S S S  
SAMN07659485 S S S S  
SAMN07660108 S S S S  
SAMN07659407 S S S S  
SAMN07658376 S S S S  
SAMN07658771 S S S S  
SAMN07659432 S S S S  
SAMN07658452 S S S S  
SAMN07658506 S S S S  
SAMN07660218 S S S S  
SAMN07658485 S S S S  
SAMN07659660 S S S S  
SAMN07658147 S S S S  
SAMN07658927 S S S S  
SAMN07660202 S S S S  
SAMN07659631 S S S S  
SAMN07658830 S S S S  
SAMN07659096 S S S S  
SAMN07659052 S S S S  
SAMN07659691 S S S S  
SAMN07659077 S S S S  
SAMN07658546 S S S S  
SAMN07658328 S S S S  
SAMN07658459 S S S S  
SAMN07659862 S S S S  
ERR2514346 S S S S  
SAMN07658392 R S S S  
SAMN07658341 S S S S  
SAMN07660224 S S S S  
SAMN07660346 S S S S  
SAMN07658352 S S S S  
SAMN07658271 R S S S  
SAMN07660056 S S S U  
SAMN07658886 U U U S  
SAMN07658992 S S S S  
SAMN07658827 S S S R  
SAMN07660160 S S S S  
SAMN07659693 U S S U  
SAMN07659718 S S S S  
SAMN07659044 S S S S  
SAMN07658575 U S S U  
SAMN07658483 S S S S  
SAMN07658518 S S S S

Supplementary I

SAMN07659456 S S S S  
SAMN07660078 S S S S  
SAMN07660170 U U U S  
SAMN07660453 U S S U  
SAMN07658902 S S S S  
SAMN07659986 S S S S  
SAMN07660005 S S S S  
SAMN07658514 S S S S  
SAMN07660213 S S S S  
SAMN07658399 S S S S  
SAMN07660022 S S S S  
SAMN07659054 R S S S  
SAMN07659477 S S S S  
SAMN07659769 R S S S  
SAMN07660070 S S S S  
SAMN07660057 S S S S  
SAMN07658995 S S S S  
SAMN07658929 S S S S  
SAMN07659473 S S S S  
SAMN07658193 S S S S  
SAMN07658538 S S S S  
SAMN07660009 S S S S  
SAMN07659714 S S S S  
SAMN07659060 S S S S  
SAMN07659759 S S S S  
SAMN07658161 S S S S  
SAMN07658621 R R S U  
SAMN07659805 S S S S  
SAMN07659917 S S S S  
SAMN07659652 S S S S  
SAMN07659097 S S S S  
SAMN07658764 S S S S  
SAMN07658820 S S S S  
SAMN07658777 S S S S  
SAMN07658807 S S S S  
SAMN07659508 S S S S  
SAMN07658994 S S S S  
SAMN07658781 S S S S  
SAMN07659108 R R U R  
SAMN07658719 S S S S  
SAMN07658503 S S S S  
SAMN07659380 S S S S  
SAMN07658408 S S S U  
SAMN07659419 S S S S  
SAMN07659604 S S S S  
SAMN07660352 S S S S  
SAMN07659490 S S S S  
SAMN07658378 R S S S  
ERR2514757 R R S S  
SAMN07658249 R S S S  
SAMN07659513 S S S S  
SAMN07659454 S S S S  
SAMN07658195 S S S S

Supplementary I

SAMN07659382 R S S S  
SAMN07659933 R S S S  
SAMN07659771 S R S S  
SAMN07659969 S S S U  
SAMN07659414 S S S S  
SAMN07658604 S S S S  
SAMN07659540 S S S U  
SAMN07659388 R R U U  
SAMN07658715 S S S S  
SAMN07658641 S S S S  
SAMN07660229 S S S S  
SAMN07660470 S S S S  
SAMN07658229 S S S S  
SAMN07658353 S S S S  
SAMN07659115 S S S S  
SAMN07659525 S S S S  
SAMN07658591 S S S S  
SAMN07660378 R R S S  
SAMN07659555 S S S S  
ERR2513680 S S S S  
SAMN07658519 S S S S  
SAMN07660012 S S S S  
SAMN07659394 R S S S  
ERR2514968 S S S S  
SAMN07659910 S S S S  
SAMN07659627 S S S U  
SAMN07659860 S S S S  
SAMN07660283 S S S S  
SAMN07658786 S S S S  
SAMN07659989 S S S S  
SAMN07659732 S S S S  
SAMN07659033 S S S S  
SAMN07659594 S S S S  
SAMN07659905 S S S S  
SAMN07658949 S S S S  
SAMN07658892 S S S S  
ERR2514240 R R R R  
ERR2513954 R R S S  
ERR2514412 S R S S  
ERR2512882 R R R R  
ERR2513872 R R S S  
ERR2515040 S R S S  
ERR2513050 S S S S  
ERR2514887 R R R R  
ERR2514014 S S S S  
ERR2515042 R R R R  
ERR2514422 R R R R  
ERR2513656 R R R R  
ERR2513221 R R S R  
ERR2512467 R R S R  
ERR2514395 R R S R  
ERR2512975 R R R R  
ERR2513831 R R R R

Supplementary I

ERR2514633 R R R R  
ERR2514487 R R R R  
SAMN07659031 S S S S  
SAMN07658260 R S S S  
SAMN07660198 S S S S  
SAMN07658582 S S S S  
SAMN07659982 S S S S  
SAMN07659859 S S S U  
SAMN07658551 S S S S  
SAMN07658203 U U S U  
SAMN07659828 S S S S  
SAMN07659017 S S S S  
SAMN07659614 S S S S  
SAMN07658868 S S S S  
SAMN07660377 R R U R  
SAMN07658284 S S S S  
SAMN07659008 S S S S  
SAMN07658313 S S S S  
SAMN07659599 S S S S  
SAMN07659619 S S S S  
SAMN07658836 S S S S  
SAMN07658134 S S S S  
SAMN07658293 S S S S  
SAMN07660302 S S S S  
SAMN07659455 S S S S  
SAMN07660323 S S S S  
SAMN07658925 S S S S  
SAMN07658753 S S S S  
SAMN07659951 S S S S  
ERR2513133 S S S S  
SAMN07659006 R S S S  
SAMN07658396 S S S S  
SAMN07658640 S S S S  
SAMN07659745 S S S S  
SAMN07659341 S S S S  
SAMN07658567 S S S U  
SAMN07659661 S S S S  
SAMN07658675 S S S S  
SAMN07658263 S S S S  
SAMN07659941 S S S S  
SAMN07658840 S S S S  
SAMN07658393 S S S S  
SAMN07659117 R R R U  
SAMN07660311 S S S S  
SAMN07660342 S S S S  
SAMN07660186 S S S S  
SAMN07658639 S S S S  
SAMN07659929 S S S S  
ERR2512728 S S S S  
SAMN07658142 S S S S  
SAMN07659425 S S S R  
SAMN07659770 S S S S  
SAMN07659656 S S S S

Supplementary I

SAMN07659020 S S S S  
SAMN07659702 S S S S  
SAMN07659603 S S S S  
SAMN07659835 S S S S  
SAMN07660114 S S S S  
SAMN07658885 S S S S  
SAMN07659679 S S S U  
SAMN07658891 S S S S  
SAMN07660313 S S S S  
SAMN07659997 S S S S  
SAMN07660248 S S S S  
SAMN07660104 S S S S  
SAMN07659328 S S S S  
SAMN07658746 S S S U  
SAMN07659790 S S S S  
SAMN07659968 S S S S  
SAMN07660028 S S S S  
SAMN07660120 S S S S  
SAMN07659602 S S S S  
SAMN07658422 U S S S  
SAMN07659584 S S S S  
SAMN07660049 S S S S  
SAMN07658894 S S S S  
SAMN07658769 S S S S  
SAMN07659829 S S S S  
SAMN07659574 S S S S  
SAMN07658851 R R S U  
SAMN07658441 S S S S  
SAMN07660398 R R S U  
SAMN07658959 S S S S  
SAMN07658947 S S S S  
ERR2514667 S S S S  
SAMN07660478 S S S S  
SAMN07659353 S S S S  
SAMN07658344 S S S S  
SAMN07658478 S S S S  
SAMN07659114 S S S S  
SAMN07659383 S S S S  
SAMN07658372 S S S S  
SAMN07660020 S S S S  
SAMN07658985 R S S S  
SAMN07659055 R S S S  
SAMN07659670 S S S S  
SAMN07658672 S S S S  
SAMN07660167 S S S S  
SAMN07658906 S S U S  
SAMN07659069 S S S U  
SAMN07659509 S S S S  
SAMN07659650 R R S S  
SAMN07658329 S S S S  
SAMN07660137 S S S S  
SAMN07658571 S S S S  
SAMN07659468 R R R U

Supplementary I

SAMN07659981 R R S U  
SAMN07658941 S S S S  
SAMN07659590 S S S U  
SAMN07660359 S S S S  
SAMN07659956 S R S S  
SAMN07658523 S S S S  
SAMN07658637 S S S S  
SAMN07660226 S S S S  
SAMN07658797 S S S S  
SAMN07658655 S S S S  
SAMN07659557 S S S S  
SAMN07660158 S S S S  
SAMN07660116 S S S S  
SAMN07660441 R R R U  
SAMN07659912 S S S S  
SAMN07659686 S S S S  
SAMN07659595 S S S S  
SAMN07658197 S S S S  
SAMN07658340 S S S S  
SAMN07658135 S R S S  
SAMN07658133 R U S S  
SAMN07660101 S S S S  
SAMN07658867 S S S S  
SAMN07658765 S S S S  
SAMN07658250 S S S S  
SAMN07659016 S S S S  
SAMN07658516 S S S S  
SAMN07660002 S S S S  
SAMN07660067 S S S S  
SAMN07659562 S S S S  
SAMN07659048 S S S S  
SAMN07658168 S S S S  
SAMN07658613 S S S S  
SAMN07659064 S S S S  
SAMN07658281 S S S S  
ERR2514175 S S S S  
SAMN07658873 S S S S  
SAMN07660014 S S S S  
SAMN07658658 S S S S  
SAMN07658211 S S S S  
SAMN07660155 S S S S  
SAMN07659378 S S S S  
SAMN07659858 U U U S  
SAMN07659834 S S S S  
SAMN07658457 R S S S  
SAMN07658243 S S S S  
SAMN07659025 S S S S  
SAMN07659371 R S S S  
SAMN07660077 S S S S  
SAMN07658632 S S S S  
SAMN07659027 S S S S  
SAMN07659109 S S S S  
SAMN07658574 U U U S

Supplementary I

SAMN07659367 S S S S  
SAMN07658759 S S S S  
SAMN07658692 R R U S  
SAMN07659326 S S S S  
SAMN07658779 S S S S  
SAMN07660086 S S S S  
SAMN07658668 S S S U  
SAMN07658437 S S S S  
SAMN07658595 R S S S  
SAMN07658875 S S S S  
SAMN07660131 S S S S  
SAMN07658487 S S S U  
SAMN07659119 S S S S  
SAMN07660000 S S S S  
SAMN07658863 S S S S  
SAMN07658282 S S S S  
SAMN07658544 S S S S  
SAMN07660043 S S S S  
SAMN07660026 S S S S  
ERR2513470 S S S S  
SAMN07658321 S S S S  
SAMN07658905 S S S S  
SAMN07659874 S S S S  
SAMN07658317 S S S S  
SAMN07659654 S S S S  
ERR2513806 S S S S  
SAMN07658987 S S S S  
SAMN07658762 S S S S  
SAMN07658218 S S S U  
SAMN07659882 S S S S  
SAMN07659057 S S S S  
SAMN07658679 S S S S  
SAMN07660227 S S S U  
SAMN07660221 S S S S  
SAMN07660097 S S S S  
SAMN07658858 S S S S  
SAMN07658223 S S S S  
SAMN07659965 S S S S  
SAMN07660465 S S S S  
SAMN07658877 S S S S  
SAMN07658859 S S S S  
SAMN07659342 S S S S  
SAMN07660370 S S S S  
SAMN07658384 S S S S  
SAMN07658988 S S S S  
SAMN07659059 S S S S  
ERR2513589 S S S S  
SAMN07660141 R S S S  
ERR2515060 S S S S  
SAMN07659675 S S S S  
SAMN07660172 S S S S  
ERR2513342 S S S S  
SAMN07660397 S S S S



Supplementary I

SAMN07660085 S S S S  
SAMN07659517 S S S S  
SAMN07659618 S S S S  
ERR2513966 S S S S  
SAMN07658185 S S S S  
ERR2514529 S S S S  
SAMN07658978 S S S S  
SAMN07660236 S S S U  
SAMN07659681 S S S S  
ERR2513724 S S S S  
SAMN07658816 S S S S  
SAMN07659384 R S S S  
ERR2513578 S S S S  
SAMN07658322 S S S S  
SAMN07660255 S S S S  
SAMN07658200 S S S S  
SAMN07658616 S S S S  
SAMN07660314 S S S S  
SAMN07658420 S S S S  
SAMN07658512 S S S S  
SAMN07659942 S S S S  
SAMN07659930 S S S S  
SAMN07658130 R S S S  
SAMN07659089 S S S S  
SAMN07658183 S S S S  
SAMN07659344 S S S S  
SAMN07660040 S S S S  
SAMN07659526 S S S S  
SAMN07658935 S S S S  
SAMN07660451 S S S S  
SAMN07660266 S S S S  
SAMN07658962 S S S S  
SAMN07660419 S S S S  
SAMN07658521 S S S S  
SAMN07660031 S S S S  
SAMN07658684 S S S S  
SAMN07660296 R S S U  
ERR2513871 S S S S  
SAMN07658357 S S S U  
SAMN07659960 R R R R  
SAMN07659337 S S S S  
SAMN07659081 S S S S  
SAMN07660371 S S S S  
SAMN07659621 S S S S  
SAMN07658508 S S S S  
SAMN07660289 S S S S  
ERR2514749 S S S S  
SAMN07659499 S S S S  
SAMN07659722 S S S S  
SAMN07658682 S S S S  
SAMN07658846 R R R U  
ERR553081 ERR553082 S S S S  
ERR137238 S S S S

Supplementary I

ERR137239 S S S S  
ERR117462 R R S S  
ERR227990 R S S S  
ERR117463 R R S S  
ERR551693 ERR551694 S S S S  
ERR227998 S S S S  
ERR137240 R S R S  
ERR137241 S S S S  
ERR552092 S S S S  
ERR137242 R S S S  
ERR550797 S S S S  
ERR137243 R R R R  
ERR117464 R R R R  
ERR108449 S R R U  
ERR2510137 S R U U  
ERR2510171 R R U U  
ERR2510202 R R U U  
ERR2510197 S R U U  
ERR2199830 S S S S  
ERR108450 R R R R  
ERR228006 R R S R  
ERR228014 R S S S  
ERR551271 S S S S  
ERR108451 S S S S  
ERR2199831 S S S S  
ERR108452 S S S S  
ERR117465 R R S S  
ERR137244 R S S S  
ERR137245 S S S S  
ERR137246 R R R R  
ERR553336 S S S S  
ERR117466 R S S S  
ERR2199832 S S S S  
ERR067714 R R R R  
ERR067715 R R R S  
ERR552975 S S S S  
ERR117467 S S S S  
ERR551859 S S S S  
ERR551394 S S S S  
ERR551814 S S S S  
ERR137247 R R R R  
ERR137248 R R S R  
ERR137249 S S S S  
ERR108432 S S S S  
ERR108433 S S S S  
ERR108434 S S S S  
ERR108435 R R S R  
ERR108436 R R R S  
ERS458062 S S S S  
ERS456778 R R R R  
ERR2516192 R R S S  
ERR2516389 R R S S  
SAMN07658256 S S S S

Supplementary I

SAMN07658458 S S S S  
SAMN07658926 S S S S  
SAMN07660450 S S S S  
SAMN07658879 S S S S  
ERR2515063 S S S S  
SAMN07658856 S S S S  
SAMN07658656 S S S S  
ERR2514150 S S S S  
SAMN07658646 S S S S  
SAMN07660262 S S S S  
SAMN07659967 S S S S  
ERR2514567 S S S S  
ERR2513434 S S S S  
SAMN07660318 S S S S  
SAMN07660063 S S S S  
SAMN07660156 S S S S  
SAMN07658466 S S S S  
SAMN07660228 S S S S  
SAMN07659991 S S S S  
SAMN07659576 S S S S  
SAMN07660068 S S S U  
SAMN07658297 S S S S  
SAMN07658131 S S S S  
SAMN07658623 R S S S  
SAMN07658557 S S S S  
SAMN07659066 S S S S  
SAMN07658283 U S S U  
SAMN07659781 S S S S  
ERR2514326 S S S S  
SAMN07660462 S S S S  
SAMN07659596 S S S U  
SAMN07658239 S S S S  
SAMN07658964 S S S S  
SAMN07658290 R S S S  
SAMN07660386 R S S S  
SAMN07658453 S S S S  
SAMN07659343 U U U S  
SAMN07658527 S S S S  
SAMN07660188 S S S S  
SAMN07658916 R U R R  
SAMN07659449 S S S S  
SAMN07659410 S S S S  
SAMN07658176 S S S S  
SAMN07658140 S S S S  
SAMN07660303 S S S S  
SAMN07658402 S S S S  
SAMN07658310 S S S S  
SAMN07660165 S S S S  
SAMN07659007 S S S S  
SAMN07658562 S S S S  
SAMN07660464 S S S S  
SAMN07659832 S S S S  
SAMN07658951 S S S S

Supplementary I

SAMN07659042 S S S S  
SAMN07658389 S S S S  
SAMN07658898 R S S S  
SAMN07658414 S S S S  
SAMN07658505 R S S S  
SAMN07658635 S S S S  
SAMN07658127 S S S S  
SAMN07659437 S S S S  
SAMN07658257 S S S S  
ERR2512929 S S S S  
SAMN07658278 R S S S  
SAMN07660073 S S S U  
SAMN07659689 S S S S  
ERR2514974 R S S S  
SAMN07659427 S S S S  
SAMN07659385 S S S S  
SAMN07658744 R S S S  
SAMN07659376 S S S S  
SAMN07658219 S S S S  
SAMN07658184 S S S S  
SAMN07659524 S S S S  
ERR2515071 S S S S  
SAMN07658570 R S S S  
SAMN07658388 S S S S  
ERR2512748 S S S S  
SAMN07659351 S S S S  
SAMN07659112 S S S S  
SAMN07658580 S S S S  
ERR2513533 S S S S  
ERR2513843 S S S S  
SAMN07659735 S S S U  
SAMN07658713 S S S R  
SAMN07658238 S S S S  
SAMN07658738 S S S S  
SAMN07658592 S S S S  
SAMN07659418 S S S U  
SAMN07659366 S S S S  
SAMN07659415 S S S S  
ERR2514342 S S S S  
SAMN07660307 S S S S  
SAMN07659519 R S S S  
SAMN07659673 S S S S  
SAMN07659966 S S S S  
SAMN07659045 S S S S  
SAMN07659999 S S S S  
SAMN07658681 S S S S  
SAMN07658714 R S S S  
SAMN07660133 S S S R  
SAMN07660223 S S S S  
SAMN07658446 R S U S  
SAMN07658625 S S S S  
SAMN07660080 S S S S  
SAMN07659708 S S S S

Supplementary I

SAMN07658983 U U U S  
SAMN07658706 S S S S  
SAMN07659904 R R S S  
SAMN07658864 S S S S  
ERR2513716 S S S S  
ERR2514118 S S S S  
SAMN07660015 S S S S  
SAMN07658374 S S S S  
SAMN07658755 R S S S  
SAMN07659939 S S S S  
SAMN07658178 S S S S  
SAMN07660100 S S S S  
SAMN07660112 S S S S  
SAMN07658461 S S S S  
SAMN07658530 S S S S  
SAMN07658922 S S S S  
SAMN07659709 S S S S  
SAMN07658347 S S S S  
ERR2514745 S S S S  
SAMN07659634 S S S S  
ERR2514087 S S S R  
ERR2513193 S S S S  
ERR2513371 S S S S  
ERR2513820 S S S U  
ERR2512750 S S S U  
ERR2514076 S S S S  
ERR2514451 R S R R  
ERR2512780 R S S S  
ERR2514012 S S S S  
ERR2512653 S S S S  
ERR2513683 S S S S  
ERR2512682 S S S S  
ERR2514913 S S S S  
ERR2512775 S S S S  
ERR2514369 S S S S  
ERR2514400 S S S S  
ERR2513516 S S S S  
ERR2512433 S S S S  
ERR2514848 R S S S  
ERR2512497 S S S S  
ERR2513688 S S S S  
ERR2513571 S S S S  
ERR2514728 S S S S  
ERR2514290 S S S S  
ERR2514548 S S S U  
ERR2513597 S S S S  
ERR2514811 S S S S  
ERR2514481 S S S S  
ERR2512525 S S S U  
ERR2513645 S S S S  
ERR2514643 S S S S  
ERR2514259 S S S S  
ERR2513970 S S S S

Supplementary I

ERR2513001 S S S S  
ERR2514078 S S S S  
ERR2513398 S S S S  
ERR2513106 S S S S  
ERR2512990 S S S S  
ERR2513172 S S S S  
ERR2514797 S S S S  
ERR2513796 S S S S  
ERR2515055 S S S S  
ERR2514377 S S S S  
ERR2514869 S S S S  
ERR2512636 S S S S  
ERR2512837 S S S S  
ERR2513742 R R R U  
ERR2513723 S S S S  
ERR2514088 R S R S  
ERR2513991 S S S S  
ERR2514528 S S S S  
ERR2514559 U S S U  
ERR2513297 S S S S  
ERR2512872 S S S S  
ERR2513354 S S S S  
ERR2514157 R S S S  
ERR2513406 S S S S  
ERR2514165 S S S S  
ERR2512694 S S S S  
ERR2514435 S S S S  
ERR2513183 S S S S  
ERR2513941 S S S S  
ERR2514120 R S S S  
ERR2512437 S S S S  
ERR2514692 S S S U  
ERR2512553 S S S S  
ERR2514055 S S S S  
ERR2514092 S S S U  
ERR2513283 S S S S  
ERR2512954 S S S R  
ERR2514659 S S S S  
ERR2514394 S S S S  
ERR2512492 S S S S  
ERR2513070 S S S S  
ERR2513146 S S S S  
ERR2514854 S S S S  
ERR2514263 S S S S  
ERR2513782 S S S S  
ERR2513704 S S S S  
ERR2514045 S S S S  
ERR2512667 S S S S  
ERR2514502 S S S S  
ERR2512964 S S S S  
ERR2514708 S S S U  
ERR2513413 S S S S  
ERR2513121 S S S S

Supplementary I

ERR2512590 S S S S  
ERR2513240 R R R S  
ERR2513995 S S S S  
ERR2512826 U U U S  
ERR2513026 S S S U  
ERR2514228 S S S S  
ERR2513573 S S S S  
ERR2514941 S S S S  
ERR2513440 S S S S  
ERR2513971 S S S S  
ERR2513436 R R R U  
ERR2513412 S S S S  
ERR2512577 S S S S  
ERR2512897 S S S S  
ERR2514793 S S S S  
ERR2514303 S S S S  
ERR2514851 S S S S  
ERR2512877 S S S S  
ERR2513746 S S S S  
ERR2514859 S S S U  
ERR2513092 S S S S  
ERR2514885 S S S S  
ERR2514938 S S S S  
ERR2514580 R S S S  
ERR2512735 S S S S  
ERR2514744 S S S S  
ERR2513588 S S S S  
ERR2513318 S S S S  
ERR2513302 S S S R  
ERR2513539 S S S S  
ERR2513270 S S S S  
ERR2513744 S S S S  
ERR2514623 U U U S  
ERR2514343 S S S S  
ERR2514345 S S S S  
ERR2513430 S S S S  
ERR2514923 S S S S  
ERR2515032 S S S S  
ERR2513593 S S S S  
ERR2512657 S S S S  
ERR2513590 S S S S  
SAMN07659655 S S S S  
SAMN07658438 S S S S  
SAMN07659021 S S S S  
ERR2514234 S S S S  
SAMN07660443 S S S S  
SAMN07659330 S S U S  
SAMN07658326 S S S S  
SAMN07659606 S S S S  
SAMN07658817 S S S S  
SAMN07659586 S S S S  
ERR2514183 S S S S  
SAMN07658721 S S S S

Supplementary I

ERR2513633 S S S S  
ERR2513848 S S S S  
SAMN07660401 S S S S  
ERR2512858 S S S S  
ERR2514366 S S S S  
ERR2514952 S S S U  
SAMN07658843 S S S S  
SAMN07658507 S S S S  
SAMN07660349 S S S S  
ERR2514217 S S S S  
ERR2512483 S S S S  
ERR2512991 S S S S  
ERR2513155 S S S S  
ERR2514310 S S S S  
ERR2513655 S S S U  
ERR2514455 S S S S  
ERR2513576 S S S S  
ERR2515082 S S S S  
ERR2512841 R S R U  
ERR2513830 S S S S  
ERR2514881 S S S S  
ERR2513345 S S S S  
ERR2512558 S S S S  
ERR2514552 S S S S  
ERR2514788 S S S S  
ERR2514116 S S S S  
ERR2513137 S S S S  
ERR2513989 S S S S  
ERR2514306 S S S S  
ERR2512570 S S S R  
ERR2513467 S S S S  
ERR2514575 S S S S  
ERR2514710 S S S S  
ERR2512921 S S S S  
ERR2512548 S S S S  
ERR2514646 R R S U  
ERR2514765 S S S S  
ERR2513972 S S S S  
ERR2514880 S S S S  
ERR2512633 S S S S  
ERR2515102 S S S S  
ERR2514207 S S S S  
ERR2512638 S S S S  
ERR2515036 S S S R  
ERR2514739 S S S S  
ERR2514070 S S S S  
ERR2513273 S S S S  
ERR2514928 S S S S  
ERR2513986 S S S S  
ERR2514658 S S S S  
ERR2513559 S S S S  
ERR2513743 S S S S  
ERR2514216 S S S S



Supplementary I

ERR2513089 S S S S  
ERR2514098 S S S S  
ERR2514119 S S S S  
ERR2513443 S S S S  
ERR2512955 S S S S  
ERR2512724 S S S S  
ERR2514688 S S U U  
ERR2514148 S S S S  
ERR2512656 S S S S  
ERR2513840 S S S S  
ERR2514796 S S S S  
ERR2513044 S S S S  
ERR2512923 S S S U  
ERR2512811 S S S S  
ERR2512450 S S S S  
ERR2514006 U S S S  
ERR2514230 S S S U  
ERR2512715 S S S S  
ERR2514735 S S S U  
ERR2512487 S S S S  
ERR2515093 S S S S  
ERR2514815 S S S U  
ERR2512625 S S S S  
ERR2512871 S S S S  
ERR2514361 S S S S  
ERR2514403 S S S S  
ERR2514126 S S S S  
ERR2514418 S S S S  
ERR2514354 U S U S  
ERR2512443 S S S S  
ERR2513904 S S S S  
ERR2513048 S S S S  
ERR2514277 S S S S  
ERR2513663 U U U S  
ERR2514686 S S S S  
ERR2514408 S S S S  
ERR2514904 S S S S  
ERR2512753 S S S S  
ERR2513343 R S S S  
ERR2514410 S S S S  
ERR2514908 S S S S  
ERR2513767 S S S S  
ERR2512541 R S S S  
ERR2514048 S S S S  
ERR2512496 S S S S  
ERR2512769 S S S U  
ERR2514822 U U U S  
ERR2514398 R R U S  
ERR2513705 S S S S  
ERR2513159 S S S S  
ERR2512658 S S S S  
ERR2512976 S S S S  
ERR2514840 S S S S

Supplementary I

ERR2513504 S S S S  
ERR2513669 S S S S  
ERR2512829 S S S S  
ERR2512912 S S S S  
ERR2513841 S S S S  
ERR2514677 S S S S  
ERR2514389 S S S S  
ERR2514681 S S S S  
ERR2512961 S S S S  
ERR2514546 S S S S  
ERR2512630 S S S S  
ERR2513883 S S S S  
ERR2513384 S S S S  
ERR2514476 S S S S  
ERR2514949 S S S S  
ERR2514898 S S S S  
ERR2514743 S S S S  
ERR2512693 S S S S  
ERR2513088 S S S S  
ERR2513338 S S S S  
ERR2514067 S S S S  
ERR2512608 S S S S  
ERR2514998 S S S S  
ERR2513535 S S S S  
ERR2513626 S S S S  
ERR2514057 S S S S  
ERR2514335 S S S S  
ERR2513025 S S S S  
ERR2513052 S S S S  
ERR2513999 R S S S  
ERR2515083 S S S S  
ERR2513842 S S S S  
ERR2514246 S S S S  
ERR2513348 S S S S  
ERR2514649 S S S S  
ERR2514778 S S S S  
ERR2514551 S S S S  
ERR2512643 S S S S  
ERR2512444 S S S S  
ERR2513884 S S S S  
ERR2513538 S S S S  
ERR2513895 S S S S  
ERR2512848 S S S S  
ERR2514210 S S S U  
ERR2512847 S S S S  
ERR2514142 R S S S  
ERR2513878 S S S S  
ERR2512948 S S S S  
ERR2513929 S S S S  
ERR2513961 R S S S  
ERR2514357 S S S S  
ERR2514789 S S S S  
ERR2513125 S S S S

Supplementary I

ERR2513803 S S S S  
ERR2513924 S S S S  
ERR2514740 U S S U  
ERR2512937 S S S S  
ERR2513866 S S S S  
ERR2513045 S S S S  
ERR2515027 S S S S  
ERR2513652 S S S S  
ERR2513016 S S S S  
ERR2514590 S S S S  
ERR2512484 S S S S  
ERR2514752 S S S S  
ERR2514109 S S S S  
ERR2514841 S S S S  
ERR2512972 S S S U  
ERR2513642 S S S S  
ERR2514167 S S S S  
ERR2515069 S S S S  
ERR2512655 S S S S  
ERR2514059 S S S S  
ERR2513416 S S S S  
ERR2514276 S S S S  
ERR2513130 S S S S  
ERR2513478 S S S S  
ERR2513834 S S S S  
ERR2512846 S S S S  
ERR2514738 S S S S  
ERR2513229 R R R U  
ERR2512511 S S S S  
ERR2513332 U S S S  
ERR2512774 S S S S  
ERR2514515 S S S S  
ERR2512967 S S S S  
ERR2512520 S S S S  
ERR2513837 S S S S  
ERR2513717 S S S S  
ERR2514305 S S S S  
ERR2514281 S S S S  
ERR2513399 S S S S  
ERR2515026 S S S S  
ERR2514272 S S S S  
ERR2514767 S S S U  
ERR2514578 S S S S  
ERR2512922 S S S S  
ERR2514479 S S S S  
ERR2514301 S S S S  
ERR2514256 S S S S  
ERR2514660 S S S S  
ERR2513291 S S S S  
ERR2513953 S S S S  
ERR2514038 S S S S  
ERR2512770 S S S S  
ERR2513665 S S S S

Supplementary I

ERR2513950 R R R S  
ERR2513817 S S S S  
ERR2515007 S S S S  
ERR2514491 S S S S  
ERR2514427 S S S S  
ERR2514274 S S S S  
ERR2513248 S S S S  
ERR2514084 S S S S  
ERR2514806 S S S U  
ERR2514557 U U U S  
ERR2513563 S S S S  
ERR2512436 S S S S  
ERR2512460 S S S U  
ERR2512503 S S S S  
ERR2514714 S S S S  
ERR2513592 S S S S  
ERR2515041 S S S S  
ERR2513795 S S S S  
ERR2514703 S S S S  
ERR2513061 S S S S  
ERR2512442 S S S S  
ERR2514772 S S S S  
ERR2514891 S S S S  
ERR2513257 S S S S  
ERR2515079 S S S S  
ERR2513063 S S S S  
ERR2513447 S S S S  
ERR2513415 S S S S  
ERR2514475 S S S S  
ERR2514926 S S S S  
ERR2512660 S S S S  
ERR2512855 S S S S  
ERR2513766 S S S S  
ERR2513054 S S S S  
ERR2514075 R R S S  
ERR2514864 S S S U  
ERR2514090 S S S S  
ERR2512598 S S S S  
ERR2514017 S S S S  
ERR2513801 S S S S  
ERR2514837 S S S R  
ERR2512934 S S S S  
ERR2515013 S S S S  
ERR2512624 S S S S  
ERR2512904 S S S S  
ERR2514137 U U S S  
ERR2513969 S S S S  
ERR2514899 S S S S  
ERR2514866 S S S S  
ERR2513758 S S S S  
ERR2513912 S S S S  
ERR2514124 S S S S  
ERR2512422 S S S U

Supplementary I

ERR2513438 S S S S  
ERR2514689 S S S U  
ERR2513483 S S S S  
ERR2514125 S S S S  
ERR2513417 S S S S  
ERR2514954 S S S S  
ERR2512524 S S S S  
ERR2513431 S S S S  
ERR2513397 S S S S  
ERR2512994 S S S S  
ERR2514748 S S S S  
ERR2514193 S S S S  
ERR2513356 S S S S  
ERR2514733 S S S U  
ERR2513210 S S S S  
ERR2512536 S S S S  
ERR2513177 S S S S  
ERR2513850 R R U U  
ERR2513233 S S S S  
ERR2512572 S S S S  
ERR2513223 S S S S  
ERR2514722 S S S S  
ERR2512523 S S S S  
ERR2512493 S S S S  
ERR2514592 S S S S  
ERR2513755 S S S S  
ERR2512528 S S S S  
ERR2515001 S S S S  
ERR2513718 S S S S  
ERR2512725 S S S U  
ERR2514073 S S S S  
ERR2512797 U S S S  
ERR2514907 S S S S  
ERR2514962 S S S U  
ERR2514558 R S S S  
ERR2513258 S S S S  
ERR2513328 S S S S  
ERR2512642 S S S U  
ERR2513251 S S S S  
ERR2513619 S S S S  
ERR2513773 S S S S  
ERR2514540 S S S S  
ERR2514977 S S S S  
ERR2512737 S S S S  
ERR2515087 U U U S  
ERR2513748 S S S S  
ERR2513107 S S S S  
ERR2514717 S S S S  
ERR2514409 S S S S  
ERR2513500 S S S S  
ERR2514750 S S S S  
ERR2512732 S S S R  
ERR2512947 S S S S

Supplementary I

ERR2514823 S S S S  
ERR2513204 S S S S  
ERR2512960 S S S S  
ERR2513071 S S S U  
ERR2514022 S S S U  
ERR2512817 S S S S  
ERR2513383 S S S S  
ERR2513641 S S S U  
ERR2513448 S S S S  
ERR2513955 S S S S  
ERR2513237 S S S S  
ERR2514862 S S S S  
ERR2512716 U S S S  
ERR2514328 S S S S  
ERR2512604 S S S S  
ERR2514291 R S S S  
ERR2513546 S S S S  
ERR2515039 S S S S  
ERR2513900 S S S S  
ERR2512900 S S S S  
ERR2513004 S S S S  
ERR2513903 S S S S  
ERR2514836 S S S S  
ERR2514138 S S S S  
ERR2513709 S S S S  
ERR2512416 S S S S  
ERR2514555 S S S S  
ERR2512783 S S S S  
ERR2514617 S S S S  
ERR2513187 S S S S  
ERR2512911 S S S S  
ERR2514858 S S S S  
ERR2513149 S S S S  
ERR2515062 S S S S  
ERR2514352 S S S R  
ERR2515022 S S S S  
ERR2515077 S S S S  
ERR2513501 S S S S  
ERR2512825 S S S S  
ERR2513737 S S S S  
ERR2514727 S S S S  
ERR2512689 S S S S  
ERR2513621 S S S S  
ERR2512592 S S S S  
ERR2513897 S S S S  
ERR2513067 U U U S  
ERR2512804 S S S S  
ERR2514011 S S S S  
ERR2513686 S S S S  
ERR2512429 S S S S  
ERR2513262 S S S U  
ERR2513098 S S S S  
ERR2514002 S S S S

Supplementary I

ERR2512677 S S S S  
ERR2514315 S S S S  
ERR2513611 S S S S  
ERR2512615 S S S S  
ERR2512767 S S S U  
ERR2512733 S S S S  
ERR2514813 S S S S  
ERR2513672 U S S S  
ERR2513902 S S S S  
ERR2514665 S S S S  
ERR2513043 U U U S  
ERR2514485 S S S S  
ERR2514760 R R R S  
ERR2513160 R S U U  
ERR2514503 R R R S  
ERR2513168 S S S S  
ERR2514973 S S S S  
ERR2512880 S S S S  
ERR2513334 S S S S  
ERR2514200 R S S S  
ERR2514852 S S S S  
ERR2514673 S S S S  
ERR2514178 U U U S  
ERR2515089 S S S S  
ERR2513181 S S S U  
ERR2514655 S S S S  
ERR2512864 S S S S  
ERR2514215 S S S S  
ERR2514794 S S S S  
ERR2514161 S S S S  
ERR2513491 S S S S  
ERR2513144 S S S S  
ERR2514261 S S S S  
ERR2513994 R R R R  
ERR2513670 S S S S  
ERR2513628 S S S S  
ERR2514442 S S S S  
ERR2514106 R R S S  
ERR2514535 U S S S  
ERR2513875 S S S S  
ERR2514325 S S S S  
ERR2513542 S S S S  
ERR2513018 S S S S  
ERR2513664 S S S S  
ERR2513925 S S S S  
ERR2512494 S S S S  
ERR2512526 S S S S  
ERR2513700 S S S S  
ERR2512743 S S S S  
ERR2513497 S S S S  
ERR2512699 S S S S  
ERR2513738 S S S S  
ERR2514953 S S S S

Supplementary I

ERR2513217 S S S S  
ERR2512741 S S S S  
ERR2513140 S S S S  
ERR2513605 U U U S  
ERR2514030 S S S S  
ERR2513509 S S U U  
ERR2512812 R S S S  
ERR2514638 S S S S  
ERR2513948 S S S S  
ERR2512601 S S S U  
ERR2512987 S S S S  
ERR2512557 S S S S  
ERR2512970 S S S S  
ERR2513658 S S S U  
ERR2514705 S S S S  
ERR2514803 S S S S  
ERR2514702 S S S S  
ERR2513632 S S S S  
ERR2513101 S S S S  
ERR2513165 R R S S  
ERR2514018 S S S S  
ERR2514390 S S S U  
ERR2514083 S S S S  
ERR2515017 S S S S  
ERR2513561 S S S S  
ERR2513617 S S S S  
ERR2512453 S S S S  
ERR2514415 S S S S  
ERR2514316 S S S S  
ERR2514250 S S S S  
ERR2512698 S S S S  
ERR2512892 S S S S  
ERR2514446 S S S S  
ERR2513231 S S S S  
ERR2514832 S S S R  
ERR2514218 S S S S  
ERR2513317 S S S S  
ERR2513109 S S S S  
ERR2513117 S S S S  
ERR2514628 S S S S  
ERR2513255 S S S S  
ERR2514270 S S S S  
ERR2513179 U U U S  
ERR2513361 S S S S  
ERR2512549 S S S R  
ERR2512556 S S S S  
ERR2514513 S S S S  
ERR2513790 S S S S  
ERR2513078 S S S S  
ERR2513011 U U U S  
ERR2512568 S S S S  
ERR2512756 S S S S  
ERR2513565 S S S U



Supplementary I

ERR2513861 S S S S  
ERR2512943 S S S S  
ERR2512546 S S S S  
ERR2513661 S S S S  
ERR2512485 S S S S  
ERR2514146 S S S S  
ERR2513264 S S S S  
ERR2513964 U S S S  
ERR2514995 S S S S  
ERR2512434 S S S S  
ERR2514706 S S S S  
ERR2513911 S S S S  
ERR2512621 S S S S  
ERR2513708 S S S S  
ERR2513396 U S U U  
ERR2514488 U S S S  
ERR2513420 S S U S  
ERR2513657 S S U S  
ERR2513275 S S S S  
ERR2513006 S S S S  
ERR2513512 S S S S  
ERR2514308 S S S S  
ERR2512883 U U U S  
ERR2514525 S S S S  
ERR2513750 S S S U  
ERR2514350 U S S U  
ERR552626,ERR552625 R R R S  
ERR551780,ERR551781 R R R R  
ERR108437 S S S S  
ERR550786,ERR550787 R R R S  
ERR551645,ERR551644 R R S R  
ERR067716 R S S S  
ERR067717 R R R S  
ERR067680 S S S S  
ERR498360 ERR498361 ERR498362 S S S S  
ERR067682 S S S S  
ERR228038 R R R S  
ERR067683 R S S S  
ERR552214 S S S S  
ERR552601 S S S S  
ERR067684 S S S S  
ERR067685 S R S S  
ERR553043 S S S S  
ERR067686 R S S S  
ERR067687 R R R R  
ERR067688 S S S S  
ERR067689 S S S S  
ERR067690 S S S R  
ERR067691 R R S S  
ERR137251 S S S S  
ERR498350 ERR498351 ERR498352 S S S S  
ERR550986 S S S S  
ERR108505 S S S S

Supplementary I

ERR137252 S S S S  
ERR108506 S S S R  
ERR137253 S S S S  
ERR552175 S S S S  
ERR137254 R R R S  
ERR137255 R R S R  
ERR108507 R R R S  
ERR108508 S S S S  
ERR108509 S S S S  
ERR108510 R R S R  
ERR108511 R R S S  
ERR137256 S S S S  
ERR137257 R R S S  
ERR552755 S S S S  
ERR137258 S S S S  
ERR137260 R R S S  
ERR137261 S S S S  
ERR2514068 S S S S  
ERR2512850 S S S S  
ERR2514857 S S S S  
ERR2513296 S S S S  
ERR2513536 S S S S  
ERR2514599 S S S U  
ERR2514695 U S U S  
ERR2514771 S S S S  
ERR2513473 S S S S  
ERR2514723 S S S S  
ERR2514579 S S S S  
ERR2513124 S S S S  
ERR2514460 S S S S  
ERR2513009 U S S S  
ERR2513977 S S U S  
ERR2513662 U U U S  
ERR2513794 S S S U  
ERR2513015 S S S S  
ERR2512842 S S S S  
ERR2514108 S S S S  
ERR2514521 S S S S  
ERR2514679 R S S S  
ERR2514981 U S S S  
ERR2514514 S S S U  
ERR2515070 S S S S  
ERR2513764 S S S S  
ERR2514351 S S S S  
ERR2513735 U U U S  
ERR2513959 S S S U  
ERR2513762 S S S S  
ERR2512773 S S S S  
ERR2512941 S S S U  
ERR137262 R R R S  
ERR137263 R R R R  
ERR137264 R R S S  
ERR137266 S S S S

Supplementary I

ERR137267 R S S S  
ERR137268 S S S S  
ERR117468 R R S S  
ERR2199833 S S S S  
ERR2199834 S S S U  
ERR137269 R R S S  
ERR553075 S S S S  
ERR137270 S S S S  
ERR550710 S S S S  
ERR137271 R R R R  
ERR137273 R R S S  
ERR137274 R R S S  
ERR137275 R R R R  
ERR137277 R R R S  
ERR137278 S S S S  
ERR137279 S S S S  
ERR137280 S S S S  
ERR2199835 S S S S  
ERR2199836 ERR2199837 R R R R  
ERR137281 R R S S  
ERR2199838 S S S S  
ERR137282 R R S S  
ERR2199839 S S S S  
ERR2199840 S S S S  
ERR2199841 R S S S  
ERR551349 S S S S  
ERR137283 R R S S  
ERR137284 R R R R  
ERR137285 S S S S  
ERR144542 R R S R  
ERR2199842 S S S U  
ERR144543 R R S S  
ERR552268 S S S S  
ERR144544 S S S S  
ERR144545 R S S R  
ERR144546 S R S S  
ERS458469 S S S S  
ERR552689 ERR552690 S S S S  
ERS457423 S S S S  
ERR144547 S S S S  
ERR144548 R R S S  
ERS457826 S S S S  
ERR551470 ERR551471 S S S S  
ERR144549 R R S S  
ERR144550 S S R S  
ERR144551 R R R S  
ERR144552 S S S S  
ERR144555 S S S S  
ERR144556 R R S S  
ERR144557 S S S S  
ERR144558 R S S S  
ERR144559 R S S S  
ERR144560 R R R R

Supplementary I

ERR144561 R R S S  
ERR144562 R R S S  
ERR144563 R R R S  
ERR552233 S S S S  
ERR144564 R S S S  
ERR144565 R S R S  
ERR552054 S S S S  
ERR144566 R R R S  
ERR144567 R R R R  
ERR551783 S S S S  
ERR2199843 ERR2199844 ERR2199845 S S S S  
ERR550617 S S S S  
ERR144569 S S S S  
ERR553278 S S S S  
ERR144570 R R S S  
ERR144571 R R R R  
ERR144573 R R R S  
ERR2199846 S S S S  
ERR2199847 S R S S  
ERR144574 R R R S  
ERR144575 R R S S  
ERR144576 R S S S  
ERR144577 S S S S  
ERR144578 S S S S  
ERR144579 R R R S  
ERR144580 R S S S  
ERR144581 R R S R  
ERR144582 S S S S  
ERR551238 R R R S  
ERR144585 S S S S  
ERR552027 S S S S  
ERR144587 R R R S  
ERR144588 R S S S  
ERR144590 R R S S  
ERR2199848 S S S S  
ERR144592 S S S S  
ERR144593 R R S S  
ERR144594 R S S S  
ERR144595 R R R R  
ERR551837 S S S S  
ERR2199849 S S S S  
ERR144596 R S R R  
ERR144597 R R S S  
ERR144598 R S S S  
ERR144599 R S S S  
ERR144600 R R R S  
ERR550948 S S S S  
ERR551977 ERR551978 S S S S  
ERR552948 S S S S  
ERR144602 S S S S  
ERR144603 S S S S  
ERR108453 R R R R  
ERR2199850 S S S S

Supplementary I

ERR144604 R S S S  
 ERR551632 S S S S  
 ERR553219 S S S S  
 ERR551732 S S S S  
 ERR551243 S S S S  
 ERR552183 S S S S  
 ERR550840 S S S S  
 ERR553346 S S S S  
 ERR144605 R S S S  
 ERR144606 R R R R  
 ERR144607 R R R R  
 ERR144608 R S R R  
 ERR144609 R S S S  
 ERR551598 S S S S  
 ERR144610 S S S S  
 ERR144611 R R S S  
 ERR144613 S S S S  
 ERR144614 S S S S  
 ERR144616 S S S S  
 ERR144618 R S S S  
 ERR144619 R R R S  
 ERR553160 R S S S  
 ERR144620 R R R R  
 ERR144621 S S S R  
 ERR144622 R R R R  
 ERR552904 S S S S  
 ERR144623 R R S S  
 ERR144624 R R R S  
 ERR551050 S S S S  
 ERR553235 S S S S  
 ERR2199851 S S S S  
 ERR144625 R R S S  
 ERR144626 S S S S  
 ERR144627 R S R S  
 ERR144628 R R R S  
 ERR228046 R R S S  
 ERR2199852 S S S S  
 ERR553255 S S S S  
 ERR2199853 ERR2199854 R R S S  
 ERR144629 S S S S  
 ERR144630 S S S S  
 ERR144631 R R R S  
 ERR551533 R S R S  
 ERR144632 R R R S  
 ERR144633 R R R S  
 ERR551631 S S S S  
 ERR144634 R R R S  
 ERR144635 R R R R  
 ERR144636 R R R R  
 ERR158569 S R S S  
 ERR158570 R R S S  
 ERR158571 S S S S  
 ERR158572 S S R S

Supplementary I

ERR552581 S S S S  
ERR552665 S S S S  
ERR158575 S S S S  
ERR158576 R R R S  
ERR2199855 ERR2199856 S S S S  
ERR158577 S S S S  
ERR2199857 S S S S  
ERR158579 R R S R  
ERR551426 S S S S  
ERR553293 S S S S  
ERR158580 R R S R  
ERR158581 R R R S  
ERR551483 S S S S  
ERR552499,ERR552498 R R R R  
ERR551714 R S S S  
ERR551420 S S S S  
ERR551867 S S S S  
ERR2199858 S S S S  
ERR158582 S S S S  
ERR551793,ERR551795,ERR551794 R R R S  
ERR550908,ERR550906,ERR550907 R R R R  
ERR551499,ERR551500,ERR551501 R R S S  
ERR552164,ERR552165 R R S R  
ERR158585 R R R S  
ERR552711,ERR552712 R R R S  
ERR158587 R R R R  
ERR550926 S S S S  
ERR158588 R R R R  
ERR551741 S S S S  
ERR158589 R S R S  
ERR158590 R R R S  
ERR158591 S S S R  
ERR158592 R R S S  
ERR158593 R R R R  
ERR158595 R R S S  
ERR551912 S S S S  
ERR551357 S S S S  
ERR158596 R R S S  
ERR158598 R R S S  
ERR552535 S S S S  
ERR228062 R R R R  
ERR227975 R R S S  
ERR227983 S R R S  
ERR227991 S S S S  
ERR227999 S S S S  
ERR551779 S S S S  
ERR228007 S S S S  
ERR228015 S S S S  
ERR228023 S S S S  
ERR228031 S S S S  
ERR551633 S S S S  
ERR228039 R R R R  
ERR228047 S S S S

Supplementary I

ERR2199859 R S S S  
ERR228055 S R S S  
ERR228063 S S S S  
ERR227976 R R S S  
ERR227984 S S S S  
ERR227992 S S S S  
ERR228000 S S S S  
ERR228008 S S S S  
ERR228016 R R R S  
ERR228024 R R R R  
ERR2199860 S S S S  
ERR228032 R R S S  
ERR228040 R S S S  
ERR551552 S S S S  
ERR551580 S S S S  
ERR228048 R S S S  
ERR228056 R R R R  
ERR228064 R R S S  
ERR227977 R R R S  
ERR227985 R R R R  
ERR228001 R R S R  
ERR228009 R R S S  
ERR228017 R R S S  
ERR228025 R R S S  
ERR228033 S S S S  
ERR228049 R R R R  
ERR228057 S S S S  
ERR228065 S S S S  
ERR553301 S S S S  
ERR227994 R R R S  
ERR228002 S S S S  
ERR228010 S S S S  
ERR228018 S S S S  
ERR228026 R S S S  
ERR228034 S S S S  
ERR228042 R R S R  
ERR552465 S S S S  
ERR228058 R S S S  
ERR550875 S S S S  
ERR227979 S S S S  
ERR552130 S S S S  
ERR227987 R R S S  
ERR228003 R R S S  
ERR228011 S S S S  
ERR228019 R R S S  
ERR228027 S S S S  
ERR552186 S S S S  
ERR228035 S S S S  
ERR228043 R R S R  
ERR552897,ERR552896 R R R R  
ERR552099,ERR552098 R R R R  
ERR228059 R R R S  
ERR551435 S S S S

Supplementary I

ERR228067 S S S S  
ERR552142,ERR552144,ERR552143 R R R R  
ERR551380,ERR551381 R R S S  
ERR553384 ERR553385 S S S S  
ERR227980 R S R S  
ERR551295,ERR551296 R R R R  
ERR227988 S S S S  
ERR551244 S S S S  
ERR227996 R R R S  
ERR228004 S S S S  
ERR228012 R R R S  
ERR228028 R R R R  
ERR228036 R R R R  
ERR228044 R S S S  
ERR551690 S S S S  
ERR228060 S S S S  
ERR552449 S S S S  
ERR228068 S S S S  
ERR552251 ERR552252 S S S S  
ERR227981 R R S R  
ERR552881 S S S S  
ERR552697 S S S S  
ERR227997 R S S S  
ERR228005 S S S S  
ERR551562 S S S S  
ERR228013 R R R S  
ERR228021 S S S R  
ERR228029 R R S S  
ERR228037 R R S S  
ERR228045 S S S S  
ERR228053 S S S S  
ERR228061 R R R S  
ERR228069 S S S S  
ERR229915 R R R S  
ERR229923 R R R S  
ERR229931 R R R R  
ERR229939 S S S S  
ERR229947 R R S S  
ERR229955 R R R S  
ERR229971 R R R R  
ERR229979 S S S S  
ERR229987 S S S S  
ERR229995 R R S S  
ERR230003 R R S S  
ERR229924 R R R S  
ERR229932 R R R S  
ERR229940 R R S S  
ERR229948 S S S S  
ERR229956 S S S S  
ERR229964 R S S S  
ERR229972 S S S S  
ERR229988 R R S S  
ERR230004 S S S S



Supplementary I

ERR229917 S S S S  
ERR552920 S S S S  
ERR229925 R S S S  
ERR229941 S S S S  
ERR229949 R R R R  
ERR229957 R S S S  
ERR229965 S R R S  
ERR229973 S S S S  
ERR229981 S S S S  
ERR229989 R S S S  
ERR551811,ERR551809,ERR551810 R R R R  
ERR553340 S S S S  
ERR552816,ERR552814,ERR552815 R R R R  
ERR229997 R R S S  
ERR230005 R R R R  
ERR552106,ERR552105 R R S R  
ERR552609 S S S S  
ERR552970,ERR552971 R R R R  
ERR229918 R R R S  
ERR551925,ERR551926 R R S S  
ERR229926 R R R S  
ERR498357 ERR498358 ERR498359 S S S S  
ERR553137 S S S S  
ERR551106 S S S S  
ERR229934 S S S S  
ERR551558,ERR551556,ERR551557 R R R S  
ERR229942 S S S S  
ERR552447,ERR552446 R R R R  
ERR552607,ERR552606 R R R R  
ERR229950 S S S S  
ERR551877,ERR551878 R R R S  
ERR229958 S S S S  
ERR552950,ERR552951 R R S S  
ERR229966 R R R S  
ERR552215,ERR552217,ERR552216 R R R R  
ERR229982 R R R R  
ERR552123,ERR552122 R R S S  
ERR229990 S R R S  
ERR551986,ERR551987 R R R S  
ERR552347,ERR552346 R R R R  
ERR551429,ERR551428 R R R R  
ERR551767,ERR551768 R R R R  
ERR229998 R R R S  
ERR2199861 S S S S  
ERR230006 R R R S  
ERR229919 S S S S  
ERR229927 R R S R  
ERR550642 S S S S  
ERR229935 R S S S  
ERR229943 S S S S  
ERR229959 S S S R  
ERR551884 S S S S  
ERR229967 R S S S

Supplementary I

ERR552985 S S S S  
ERR229975 S S S S  
ERR229983 R S S S  
ERR552511 S S S S  
ERR553112 S S S S  
ERR551486 S S S S  
ERR229991 S S S S  
ERR229999 R S R S  
ERR230007 R R R S  
ERR229920 S S S R  
ERR553079 S S S S  
ERR229928 S S S R  
ERR229936 R R R R  
ERR229944 S S S S  
ERR229960 R R S S  
ERR229968 R R R S  
ERR229976 R R R S  
ERR229984 R R R S  
ERR229992 S S S S  
ERR230008 R R S S  
ERR552567 S S S S  
ERR229921 R R R S  
ERR229929 R R R R  
ERR229937 S S S S  
ERR229945 S S S S  
ERR229953 R R S S  
ERR229961 R S R S  
ERR229969 R R S R  
ERR551433 S S S S  
ERR229977 S S S S  
ERR229985 S S S S  
ERR552059 S S S S  
ERR229993 R R R R  
ERR230001 S S S S  
ERR229922 R R R S  
ERR229938 S S S R  
ERR229946 R R R S  
ERR229954 S S S S  
ERR229962 R R R S  
ERR229970 S S S S  
ERR229978 R R R S  
ERR229986 S S S S  
ERR229994 R R S S  
ERR230002 S S S S  
ERR230010 S S S S  
ERR234652 S S S S  
ERR234653 R R S S  
ERR234654 R R R S  
ERR234655 R S S S  
ERR234657 R R R R  
ERR2199862 ERR2199863 S S S S  
ERR234658 R R R R  
ERR552280 S S S S

Supplementary I

ERR234660 R R R S  
ERR234661 R R R R  
ERR234662 R S R S  
ERR234663 S S S S  
ERR234664 S S S S  
ERR2199864 S S S S  
ERR234666 R R S S  
ERR2199865 S S S S  
ERR234667 S S S S  
ERR552715 S S S S  
ERR551072 S S S S  
ERR234668 R R R R  
ERR234669 R R S R  
ERR552976 S S S S  
ERR234671 R R S R  
ERR2199866 ERR2199867 S S S S  
ERR234672 R R R R  
ERR2199868 S S S S  
ERR234674 R S S S  
ERR2199869 ERR2199870 S S S S  
ERR234683 R S S S  
ERR234684 S S S S  
ERR234685 S S S S  
ERR2199871 S S S S  
ERR234686 S S S S  
ERR551742 S S S S  
ERR234687 S S S S  
ERR551778 S S S S  
ERR234688 R S R R  
ERR234689 S S S S  
ERR552884 S S S S  
ERR234690 S S S S  
ERR234691 S S S S  
ERR234692 R R S S  
ERR552630 S S S S  
ERR2199872 ERR2199873 S S S S  
ERR2199874 S S S S  
ERR551149 S S S S  
ERR552863 S S S S  
ERR234693 R S S S  
ERR234694 S S S S  
ERR234695 S S S S  
ERR234696 R S S R  
ERR234697 S S S S  
ERR552353 S S S S  
ERR551881 ERR551882 S S S S  
ERR2199875 S S S S  
ERR234698 R R S S  
ERR234699 R S S R  
ERR553174 S S S S  
ERR551116 S S S S  
ERR550871 S S S S  
ERR498391,ERR498392 S S S S

Supplementary I

ERR551022 S S S S  
 ERR552578 R S S S  
 ERR2199876 ERR2199877 S S S S  
 ERR2199878 S S S S  
 ERR551350 S S S S  
 ERR550835 S S S S  
 ERR553359 S S S S  
 ERR553062 S S S S  
 ERR551358 S S S S  
 ERR551080 S S S S  
 ERR2199879 S S S S  
 ERR552326 R R S S  
 ERR550974 S S S S  
 ERR2199880 ERR2199881 S S S S  
 ERR552315 S S S S  
 ERR2199882 ERR2199883 S S S S  
 ERR552582 R S S S  
 ERR552960 S S S S  
 ERR551695 S S S S  
 ERR551911 S S S S  
 ERR552006 S S S S  
 ERR551662 S S S S  
 ERR552372 S S S S  
 ERR551389 S S S S  
 ERR2199884 S S S S  
 ERR552686 S S S S  
 ERR553016 S S S S  
 ERR551406 S S S S  
 ERR2199885 ERR2199886 S S S S  
 ERR2199887 S S S S  
 ERR551738,ERR551737 R R R R  
 ERR552413,ERR552412 R R S S  
 ERR551735,ERR551736 R R R R  
 ERR553179,ERR553178 R R R S  
 ERR551285,ERR551284 R R R R  
 ERR551952,ERR551951 R R S S  
 ERR552301,ERR552302 R R R S  
 ERR551466,ERR551467 R R R S  
 ERR552918 S S S S  
 ERR551990 S S S S  
 ERR550704 S S S S  
 ERR552066 S S S S  
 ERR2199888 S S S S  
 ERR553225 S S S S  
 ERR552722 S S S S  
 ERR551862,ERR551861 R R S R  
 ERR550830,ERR550829 R R R R  
 ERR552545,ERR552546 R R R R  
 ERR550838,ERR550837 R R R R  
 ERR552398,ERR552399 R R S R  
 ERR551787 R S S S  
 ERR552602 S S S S  
 ERR552007,ERR552008 R R R R

Supplementary I

ERR2199889 S S S S  
ERR2199890 S S S S  
ERR2199891 S S S S  
ERR552269 S S S S  
ERR2199892 S S S S  
ERR2199893 R S S S  
ERR551375 S S S S  
ERS458259 S S S S  
ERS458497 R S S S  
ERS458130 S S S S  
ERS457929 S S S S  
ERR553084 S S S S  
ERR551236 R R R R  
ERR2199894 S S S S  
ERR553136 S S S S  
ERR550936 R S S S  
ERR550709 S S S S  
ERR552827 S S S S  
ERR551902 S S S S  
ERR552155 S S S S  
ERR551041 S S S S  
ERR552639 S S S S  
ERR552402 S S S S  
ERR2199895 S S S S  
ERR2199896 S S S S  
ERR551989 S S S S  
ERR551282 S S S S  
ERR550998 S S S S  
ERR551117 S S S S  
ERR551065 S S S S  
ERR551110 S S S S  
ERR552528 S S S S  
ERR552871 S S S S  
ERR552207 S S S S  
ERR553280 S S S S  
ERR553287 S S S S  
ERR552691 S S S S  
ERR551893 S S S S  
ERR552759 S S S S  
ERR552657 S S S S  
ERR552804 S S S S  
ERR2199897 R S S S  
ERR551663 R S S S  
ERR2199898 S S S S  
ERR552835 S S S S  
ERR551267 S S S S  
ERR553159 S S S S  
ERR553048 S S S S  
ERR551225 S S S S  
ERR552290 S S S S  
ERR552178 S S S S  
ERR550957 S S S S  
ERR551657 S S S S

Supplementary I

ERR550700 S S S S  
ERS458315 S S S S  
ERR551763 S S S S  
ERS457433 S S S S  
ERS458341 S S S S  
ERR552564 S S S S  
ERS458107 S S S S  
ERR551868 S S S S  
ERR552680 S S S S  
ERR550678 S S S S  
ERR552783 ERR552784 S S S S  
ERR552856 S S S S  
ERR2199899 ERR2199900 S S S S  
ERR2199901 ERR2199902 S S S S  
ERR551761 S S S S  
ERR552866 S S S S  
ERR552757 S S S S  
ERR553271 S S S S  
ERR551505 S S S S  
ERR552335 S S S S  
ERR2199903 S S S S  
ERR550938 S S S S  
ERR553055 S S S S  
ERR550924 S S S S  
ERR551273 S S S S  
ERR552126 S S S S  
ERR551933 S S S S  
ERR551374 S S S S  
ERR552058 S S S S  
ERR553202 S S S S  
ERR552761 S S S S  
ERR552085 S S S S  
ERR551602 S S S S  
ERR550773,ERR550772 R R R R  
ERR552978,ERR552977 R R R S  
ERR552931,ERR552932 R R S R  
ERR2199904 S S S S  
ERR551528,ERR551527 R R S R  
ERR552973,ERR552974 R R R S  
ERR552244,ERR552245 R R R R  
ERR551016,ERR551015 R R R R  
ERR551087 S S S S  
ERR551413 S S S S  
ERR550630 S S S S  
ERR550714 S S S S  
ERR552820 S S S S  
ERR551993 S S S S  
ERR551840 S S S S  
ERR553199 S S S S  
ERR551013 S S S S  
ERR551188 S S S S  
ERS458746 S S S S  
ERS457436 R S S R

Supplementary I

ERR550755 R S S R  
 ERR551434 S S S S  
 ERR2199905 S S S S  
 ERR551849 S S S S  
 ERR551463 S S S S  
 ERR550745 S S S S  
 ERR551974,ERR551973 R R R R  
 ERR2199906 S S S S  
 ERR552322,ERR552321 R R R R  
 ERR551360,ERR551361,ERR551362 R R R R  
 ERR552683 S S S S  
 ERR551351 S S S S  
 ERR551301 S S S S  
 ERR2199907 ERR2199908 S S S S  
 ERR2199909 S S S S  
 ERS457167 S S S S  
 ERS457639 S S S S  
 ERR550811 S S S S  
 ERS457170 S S S S  
 ERR551490 S S S S  
 ERR552313 ERR552314 S S S S  
 ERR2199910 ERR2199911 S S S S  
 ERR2199912 S S S S  
 ERR550865 S S S S  
 ERR552168 S S S S  
 ERR2041696 R R S S  
 ERR2041698 R R R R  
 ERR2041699 ERR2041700 R R R R  
 ERR2041701 ERR2041702 R R R R  
 ERR2041703 ERR2041704 R R S R  
 ERR2041705 ERR2041706 R R S R  
 ERR2041707 ERR2041708 R R S R  
 ERR2041709 R R R R  
 ERR2041710 ERR2041711 R R S R  
 ERR2041712 R R R R  
 ERR2041713 ERR2041714 R R R R  
 ERR2199913 S S S S  
 ERR2041715 ERR2041716 R R S R  
 ERR2199914 R R R R  
 ERR2041717 R R R R  
 ERR552212 S S S S  
 ERR551842 S S S S  
 ERR551572 S S S S  
 ERR551388 S S S S  
 ERR552177 R S S S  
 ERR552391 R R S S  
 ERR553119 S S S S  
 ERR551077 S S S S  
 ERR550846 S S S S  
 ERR551277 S S S S  
 ERR551415 S S S S  
 ERR551078 S S S S  
 ERR552355 S S S S

Supplementary I

ERR551097 S S S S  
 ERR552272 S S S S  
 ERR551458 S S S S  
 ERR2199915 S S S S  
 ERR552385 S S S S  
 ERR550628 S S S S  
 ERR553231 S S S S  
 ERR552943 S S S S  
 ERS457076 R S S R  
 ERS457803 S S S S  
 ERR550791 S S S S  
 ERS457122 R R R R  
 ERR498287 ERR498288 ERR498289 S S S S  
 ERR553374 S S S S  
 ERR2199916 S S S S  
 ERR553158 S S S S  
 ERS456829 S S S S  
 ERR2199917 S S S S  
 ERR553277 S S S S  
 ERR551441 S S S S  
 ERS457914 S S S S  
 ERR553239 S S S S  
 ERR550921 S S S S  
 ERR2199918 S S S S  
 ERR2199919 S S S S  
 ERR552193 R R R R  
 ERR2199920 S S S U  
 ERR552727 S S S S  
 ERR2199921 S S S U  
 ERR550619 R R R R  
 ERR2199922 S S S U  
 ERR2199923 S S S U  
 ERR2199924 S S S U  
 ERR2199925 S S S U  
 ERR2199926 S S S U  
 ERR2199927 S S S U  
 ERR2199928 S S S U  
 ERR2199929 S S S U  
 ERR2199930 S S S U  
 ERR2199931 S S S U  
 ERR2199932 S S S U  
 ERR2199933 S S S U  
 ERR2199934 S S S U  
 ERR2199935 S S S U  
 ERR2199936 S S S U  
 ERR2199937 S S S U  
 ERR553324 S S S U  
 ERR2199938 S S S U  
 ERR551045 R R S R  
 ERR551941 ERR551942 S S S U  
 ERR2199939 S S S U  
 ERR619080 S S S U  
 ERR553058 R R R S



Supplementary I

ERR552352 R S S R  
ERR2199940 S S S U  
ERR2199941 S S S U  
ERR2199942 S S S U  
ERR2199943 S S S U  
ERR2199944 S S S U  
ERR551854 ERR551855 S S S U  
ERR2199945 S S S U  
ERR551194 ERR551195 R U R R  
ERR2199946 S S S U  
ERR2199947 S S S U  
ERR552491 R R R R  
ERR551627 S S S S  
ERR2199948 S S S S  
ERR2199949 S S S U  
ERR552754 R R R R  
ERR552456 R R S R  
ERR2199950 S S S U  
ERR552108 ERR552109 S S S U  
ERR2199951 S S S U  
ERR552710 R R S R  
ERR550660 S S S S  
ERR2199952 S S S U  
ERR2199953 ERR2199954 S S S U  
ERR552013 S S S S  
ERR2199955 S S S U  
ERR551608 S S S S  
ERR2199956 S S S U  
ERR551025 S S S S  
ERR551229 S S S S  
ERR551170 S S S S  
ERR2199957 S S S S  
ERR551018 S S S S  
ERR553357 R R S R  
ERR551196 R R R R  
ERR551612 S S S S  
ERR550969 R S S S  
ERR552379 R S S S  
ERR551029 R S S S  
ERR2199958 S S S S  
ERR550947,ERR550946 R S S S  
ERR2199959 ERR2199960 S S S S  
ERR552271 S S S S  
ERR552477 S S S S  
ERR552828 S S S S  
ERR552706 S S S S  
ERR552583 S S S S  
ERR551520 S S S S  
ERR2199961 S S S S  
ERR552882,ERR552883 R R R R  
ERR2199962 S S S S  
ERR2199963 S S S S  
ERR2199964 S S S S

Supplementary I

ERS458588 R S S S  
 ERS457550 S S S S  
 ERS457476 R S R R  
 ERS457695 S S S S  
 ERR551091 R S S S  
 ERR553332 R S S S  
 ERR552832 S S S S  
 ERR551105,ERR551104 R R R R  
 ERR551063,ERR551062 R R R S  
 ERR550895,ERR550894 R R S S  
 ERR552226,ERR552225 R R S R  
 ERR550980,ERR550981 R R R S  
 ERR551582,ERR551581 R R R R  
 ERR550713 S S S S  
 ERR550784,ERR550785 R R R S  
 ERR551232 S S S S  
 ERR553098,ERR553097 R R S S  
 ERR551910,ERR551909 R R S R  
 ERR552638 S S S S  
 ERR2199965 S S S S  
 ERR2199966 S S S S  
 ERR550761 S S S S  
 ERR2199967 S S S S  
 ERR551908 S S S S  
 ERR550796 S S S S  
 ERR552137 S S S S  
 ERR552957 S S S S  
 ERR551252 S S S R  
 ERR550699 S S S S  
 ERR552227 S S S S  
 ERR552436 S S S S  
 ERR552145 S S S R  
 ERR550746 S S S S  
 ERR551344 S S S S  
 ERR2199968 ERR552695 S S S S  
 ERR551079 S S S U  
 ERR552811 S S S S  
 ERR2199969 S S S U  
 ERR2199970 S S S U  
 ERR2199971 S S S U  
 ERR2199972 S S S U  
 ERR2199973 S S S U  
 ERR551609 R U R R  
 ERR553387 S S S S  
 ERR551071 S S S U  
 ERR2199974 S S S S  
 ERR550741 R R R R  
 ERR2199975 S S S U  
 ERS457092 S S S S  
 ERR552518 R R R R  
 ERR553105 R R R U  
 ERR2199976 S S S U  
 ERS458656 S S S S

Supplementary I

ERR551733 S S S S  
ERR553230 R R R R  
ERR2199977 S S S U  
ERR552083 R U R R  
ERR552821 ERR552822 R U R R  
ERR551988 S S S S  
ERR552637 R U R R  
ERR2199978 S S S S  
ERR2199979 S S S U  
ERR2199980 S S S S  
ERS457325 R R R S  
ERR2199981 S S S U  
ERR552396 ERR552397 S S S U  
ERR551825 R S S R  
ERR2199982 S S S U  
ERR551594 S S S S  
ERR552464 S S S S  
ERR551030 R S S S  
ERR551968 S S S S  
ERR550747 S S S S  
ERS458403 S S S S  
ERS457053 R S S S  
ERS456997 S S S S  
ERS457811 S S S S  
ERR552861 S S S S  
ERR550935 S S S S  
ERR2199983 S S S S  
ERR551047 S S S S  
ERR552892 S S S S  
ERR552758 S S S S  
ERR552945 S S S S  
ERR552378 S S S S  
ERR2199984 ERR2199985 S S S S  
ERR552263 S S S S  
ERR551784 S S S S  
ERR553088 S S S S  
ERR552923 R S S S  
ERR552880 S S S S  
ERR553150 S S S S  
ERR551674 ERR551675 S S S S  
ERR552264 S S S S  
ERR553120 R S S S  
ERR2199986 S S S S  
ERR552055 S S S S  
ERR552988 S S S S  
ERR551275 S S S S  
ERR551886 S S S S  
ERR552543 S S S S  
ERR550927 S S S S  
ERR552382 S S S S  
ERR552703 S S S S  
ERR550839 S S S S  
ERR553077 S S S S

Supplementary I

ERR553227 S S S S  
ERR2199987 S S S S  
ERR551661 S S S S  
ERR553203 R S S S  
ERR552146 S S S S  
ERR552128 S S S S  
ERR551286 S S S S  
ERR553003 S S S S  
ERR553033 S S S S  
ERR553310 S S S S  
ERR551774 S S S S  
ERR553005 S S S S  
ERR2199989 S S S U  
ERR552394 S S S S  
ERR2199990 S S S U  
ERR2199991 S S S U  
ERR551614 S S S S  
ERR2199992 S S S U  
ERR2199993 S S S U  
ERR2199995 S S S U  
ERR2199996 S S S U  
ERR2200003 S S S S  
ERR2199998 S S S U  
ERR2199999 S S S U  
ERR2200000 S S S U  
ERR2200001 S S S U  
ERR2200002 S S S U  
ERR551545 R R R R  
ERR2200004 S S S U  
ERR2200005 S S S U  
ERR550867 ERR550868 S S S U  
ERR2200006 S S S U  
ERR2200007 S S S U  
ERR2200008 S S S U  
ERR2200009 S S S U  
ERR550632 S S S S  
ERR2200010 S S S U  
ERR2200011 ERR552806 R S S U  
ERR552316 S S S S  
ERR2200012 S S S S  
ERR552278 S S S S  
ERR552547 S S S S  
ERR551395 S S S S  
ERR552862 S S S S  
ERR2200013 S S S U  
ERR2200014 S S S U  
ERR551679 S S S S  
ERS457742 S S S S  
ERR552512 S S S S  
ERR2200015 S S S U  
ERR551160 S S S S  
ERR551120 S S S S  
ERS457645 S S S S

Supplementary I

ERR2200016 S S S S  
 ERR2200017 S S S U  
 ERR2200018 S S S U  
 ERR2200019 S S S U  
 ERR2200020 S S S U  
 ERR2200021 S S S U  
 ERR2200022 ERR553221 R R R R  
 ERR2200023 S S S U  
 ERR551382 S S S S  
 ERR552381 S S S S  
 ERR550629 S S S S  
 ERR2200024 S S S U  
 ERR2200025 S S S U  
 ERR552857 S S S S  
 ERR2200026 ERR2200027 S S S S  
 ERR553283 S S S S  
 ERR552721 S S S S  
 ERR550661 S S S S  
 ERR552749 S S S S  
 ERR551607 S S S S  
 ERR552235 S S S S  
 ERR552912 S S S S  
 ERR551459 S S S S  
 ERR553069 S S S S  
 ERR2200028 S S S S  
 ERR551497 S S S S  
 ERR551718 S S S S  
 ERR551026 S S S S  
 ERR551606 S S S S  
 ERR551776,ERR551775,ERR551777 R R R R  
 ERR551646 S S S S  
 ERR553089 S S S S  
 ERS456906 S S S S  
 ERS458757 S S S S  
 ERR2200029 S S S S  
 ERR552460 S S S S  
 ERR552096 S S S S  
 ERR553155 S S S S  
 ERR550718 R R S S  
 ERR551125 S S S S  
 ERR551183 S S S S  
 ERR552624 S S S S  
 ERR2200030 ERR2200031 ERR551204 R S S S  
 ERR2200032 S S S U  
 ERR2200033 S S S U  
 ERR2200034 S S S U  
 ERR2200035 S S S U  
 ERR2200036 S S S S  
 ERR2200037 S S S U  
 ERR2200038 S S S U  
 ERR551899 R R R R  
 ERR553294 S S S S  
 ERR553156 ERR553157 S S S U

Supplementary I

ERR2200039 S S S U  
ERR551828,ERR551829 R R S S  
ERR551750,ERR551749,ERR551748 R R S S  
ERR552764 ERR552765 R R R R  
ERR2200040 S S S U  
ERR551670 R S S S  
ERR553039 S S S S  
ERR552020 R S S S  
ERR552717 S S S S  
ERR553090 S S S S  
ERR551573 S S S S  
ERR553254 S S S S  
ERR550795 S S S S  
ERR552025 S S S S  
ERR551752 S S S S  
ERS458414 S R S S  
ERS458258 S S S S  
ERR552645,ERR552646 R R S R  
ERR550978 R S S S  
ERR553373 S S S S  
ERR2200041 S S S S  
ERR2200042 S S S S  
ERR2200043 S S S U  
ERR550711 S S S S  
ERR2200044 S S S U  
ERR552688 S S S S  
ERR2200045 S S S U  
ERR551086 S S S S  
ERR2200048 ERR552420 R S S R  
ERR552914 R S S S  
ERR2200049 S S S U  
ERR552484 R R R R  
ERR2200050 S S S S  
ERR2200051 S S S U  
ERR552057 S S S S  
ERR2200052 S S S U  
ERR2200053 S S S S  
ERR2200054 S S S S  
ERR550739 S S S S  
ERR550774 S S S S  
ERR552018 S S S S  
ERR2200055 S S S S  
ERR552461 S S S S  
ERR551481 S S S S  
ERR551672 S S S S  
ERS457344 S S S S  
ERS457104 S S S S  
ERR550944 S S S S  
ERR2200056 S S S S  
ERR2200057 S S S S  
ERR552359 S S S S  
ERR551274 S S S S  
ERR552788 R S S S

Supplementary I

ERR552154 S S S S  
ERR553256 S S S S  
ERR551393 R R R U  
ERR2200058 ERR552487 R R R R  
ERR553078 S S S S  
ERR553223 S S S S  
ERR551396 S S S S  
ERR551098 S S S S  
ERR551487 S S S S  
ERR2200059 S S S S  
ERR2200060 ERR2200061 ERR553328 R R R R  
ERR551712 S S S S  
ERR553266 S S S S  
ERR551813 R S S S  
ERR2200062 S S S S  
ERR2200063 S S S S  
ERR551720 S S S S  
ERR2200064 ERR553204 R R R R  
ERR551272 S S S S  
ERR2200065 S S S U  
ERR2200066 ERR551621 R R S R  
ERR552544 S S S S  
ERR2200067 S S S U  
ERR2200068 ERR2200069 S S S U  
ERR551322 S S S S  
ERR2041718 R R R S  
ERR2041719 R R S S  
ERR2041720 R R R R  
ERR2041721 R R R R  
ERR2041722 R R S S  
ERR551096 S S S S  
ERR2041723 R R R S  
ERR2041724 R R S S  
ERR2041727 R R R R  
ERR2041728 R R S R  
ERR2041729 R R S S  
ERR2041730 R R R S  
ERR2041731 R R R S  
ERR2041732 R R S R  
ERR551157 S S S S  
ERR2041733 R R R S  
ERR2041734 R R R R  
ERR2041735 R R R S  
ERR2041736 R R R S  
ERR2041737 ERR2041738 R R R R  
ERR2041739 R R R S  
ERR2200070 R R R R  
ERR552587 S S S S  
ERR550696 S S S S  
ERR2200071 R S S S  
ERR2200072 S S S R  
ERR2200073 S S S S  
ERR552850 S S S S

Supplementary I

ERR553392 S S S S  
ERR551754 S S S S  
ERR551959,ERR551960 R R S S  
ERR551948,ERR551949 R R R S  
ERR552704 S S S S  
ERR2200074 S S S U  
ERR552294 S S S S  
ERR552730 S S S S  
ERR2200076 S S S U  
ERR551579 S S S S  
ERR2200077 S S S U  
ERR551937 ERR551938 R R R R  
ERR2200078 S S S U  
ERR2200079 S S S U  
ERR552743 S S S U  
ERR552071 R S S S  
ERR552993 ERR552994 R R R R  
ERR2200080 S S S U  
ERR553216 R R R R  
ERR551390 S S S S  
ERR551901 S S S S  
ERR551655 S S S S  
ERR552980 S S S S  
ERR551495,ERR551496 R R R R  
ERR552042,ERR552041 R R R S  
ERR553051,ERR553050 R R R R  
ERR552791,ERR552790 R R R R  
ERR551121 R R R R  
ERR2200081 S S S S  
ERR2200082 S S S S  
ERR552300 S S S S  
ERR551084 S S S S  
ERR551303 S S S S  
ERR552043 S S S S  
ERR2200083 ERR2200084 S S S S  
ERR552737 S S S S  
ERR551883 S S S S  
ERR551574 S S S S  
ERS457854 S S S S  
ERS457331 S S S S  
ERR553362 S S S S  
ERR551186 S S S S  
ERR552858 R S S S  
ERR551541 S S S S  
ERR550825 S S S S  
ERS456952 S S S S  
ERR552060 S S S S  
ERR551346 S S S S  
ERR551753 S S S S  
ERR550892,ERR550893 R R R S  
ERR552611,ERR552610 R R S S  
ERR2200085 S S S S  
ERR550730 S S S S



Supplementary I

ERR552490 S S S S  
ERR552375 S S S S  
ERR551356 S S S S  
ERR552577 S S S S  
ERR552812 S S S S  
ERR553023,ERR553022 R R S S  
ERR550633 S S S S  
ERR551539,ERR551540 R R R R  
ERR551719 S S S S  
ERR553036 S S S S  
ERR552345 S S S S  
ERR498363 ERR498364 ERR498365 S S S S  
ERS457810 S S S S  
ERS458448 R R R S  
ERS458196 S S S S  
ERR2200087 S S S U  
ERR552073 R R R R  
ERR2200088 S S S U  
ERR552276 S S S S  
ERR552597 S S S S  
ERR551012 S S S S  
ERR550767 S S S S  
ERR550685,ERR550684 R R R S  
ERR550848,ERR550849 R R R R  
ERR551715 S S S S  
ERR551460,ERR551461 R R R R  
ERR552458,ERR552457 R R R R  
ERR550914,ERR550915 R R R S  
ERR552510,ERR552509 R R R S  
ERR551478,ERR551477 R R U R  
ERR552248 S S S S  
ERR552724 S S S S  
ERR2200089 S S S S  
ERR550890,ERR550891 R R R S  
ERR552047 R R R R  
ERR2200090 S S S S  
ERR551802 S S S S  
ERR552367 S S S S  
ERR498376,ERR498375 S S S S  
ERR550806,ERR550807 R R R R  
ERS456981 S S S S  
ERR552080,ERR552079 R R S S  
ERS456816 S S S S  
ERR552410,ERR552409 R R S S  
ERR551159 R R S R  
ERR551684 S S S S  
ERR550828 S S S S  
ERR550802 S S S S  
ERR551874 S S S S  
ERR550983 S S S S  
ERR551114 S S S S  
ERR552076 S S S S  
ERR551064 S S S S

Supplementary I

ERR551345 S S S S  
ERR552091 S S S S  
ERR550818 S S S S  
ERR552568 S S S S  
ERR553068 R R R R  
ERR552559,ERR552561,ERR552560 R R S R  
ERR551957,ERR551956 R R R R  
ERR552940,ERR552939 R R S R  
ERR2200091 S S S S  
ERR551894,ERR551895 R R S R  
ERR552065,ERR552064 R R R S  
ERR2041740 ERR2041741 R R S S  
ERR2041742 R R S R  
ERR550928,ERR550929 R R S R  
ERR552926,ERR552927 R R R R  
ERR2041743 R R R S  
ERR2041744 R R S R  
ERR2041745 R R S S  
ERR2041746 R R R R  
ERR2041747 R R R S  
ERR2041748 R R R R  
ERR2041749 R R R R  
ERR2041750 R R R R  
ERR2041751 R R S S  
ERS457689 S S S S  
ERR2041752 R R R S  
ERR2041753 R R R S  
ERR2041754 R R R R  
ERR550880 S S S S  
ERR551586 S S S S  
ERR2041755 R R R S  
ERR2200092 R R R S  
ERS457924 S S S S  
ERR2041756 R R R S  
ERR2041757 R R R R  
ERR2041758 R R S S  
ERR552653,ERR552652 R R R R  
ERR552693 S S S S  
ERR2041759 R R R R  
ERR2200093 R R R S  
ERR2041760 R R R R  
ERR2041761 R R R S  
ERR2041762 R R R R  
ERR2041763 R R R R  
ERR2041764 R R R R  
ERR2041765 R R S R  
ERR2041766 R R R S  
ERR551827,ERR551826 R R S R  
ERR2041767 R R S S  
ERR2041768 R R R S  
ERR2041769 R R R S  
ERR2041770 R R S S  
ERR552519,ERR552520 R R R R

Supplementary I

ERR551964 S S S S  
ERR552924 S S S S  
ERR552504,ERR552503 R R R R  
ERR552687 S S S S  
ERR2200096 S S S U  
ERR551757,ERR551758 R R R R  
ERR551000,ERR550999 R R R R  
ERR551397 S S S S  
ERR553019 S S S S  
ERR552572,ERR552573 R R R R  
ERR550821 S S S S  
ERR553180,ERR553181 R R S S  
ERR552293 S S S S  
ERR2200097 S S S S  
ERR552274 R R R S  
ERR550960,ERR550961 R R R S  
ERR551947,ERR551946 R R R S  
ERR552681,ERR552682 R R S S  
ERR552966 S S S S  
ERS458484 S S S S  
ERR551251,ERR551250 R R S S  
ERR551816,ERR551815 R R S S  
ERR552834,ERR552833 R R R R  
ERR552628 S S S S  
ERR552014 S S S S  
ERR552953 S S S S  
ERR551455 S S S S  
ERR551596,ERR551595 R R S S  
ERR553038 S S S S  
ERR551723 S S S S  
ERR552028 S S S S  
ERR551616 S S S S  
ERR551771,ERR551770 R R S S  
ERR551841 S S S S  
ERR2200098,ERR2200099 S S S S  
ERR2200100 S S S S  
ERR551279 S S S S  
ERR552868 S S S S  
ERR552428 S S S S  
ERR551504 S S S S  
ERR2200101 S S S S  
ERR551822,ERR551821 R R R S  
ERR552781 S S S S  
ERR2200102 S S S S  
ERR552418,ERR552417 R R R S  
ERR550620 S S S S  
ERR552819,ERR552818 R R S R  
ERR552770 S S S S  
ERS458489 R R R S  
ERR550950,ERR550949 R R R S  
ERR551259,ERR551258 R R R S  
ERR551526 S S S S  
ERR553264 R R R U

Supplementary I

ERR2200103 S S S U  
ERR553342 ERR553343 R R R U  
ERR552612 R R R R  
ERR552361 R R R U  
ERR552495 R R R R  
ERR551245 S S S S  
ERR553358 R R R R  
ERR552124 R R R R  
ERR553182 R S S R  
ERR551979 ERR551980 ERR551981 ERR551982 S S S U  
ERR551578 R R S S  
ERR553171 S S S S  
ERR553066 S S S S  
ERR2200104 S S S S  
ERR553049 S S S S  
ERR551340 S S S S  
ERR550618 S S S S  
ERR551103 S S S S  
ERR551898 S S S S  
ERR551931 S S S S  
ERR552656 S S S S  
ERR553276 S S S S  
ERR552508 S S S S  
ERR552705 S S S S  
ERR551143 S S S S  
ERR550768 S S S S  
ERR552513,ERR552514 R R R R  
ERR553262 S S S S  
ERR553381 S S S S  
ERR551442 S S S S  
ERR551522 S S S S  
ERR550856 S S S S  
ERR2041771 R R S S  
ERR2041772 R R S R  
ERR2041773 R R S S  
ERR2041774 R R R R  
ERR2041775 R R R R  
ERR2041776 R R S S  
ERR2041777 R R R R  
ERR2041780 R R R R  
ERR2041781 R R R S  
ERR2041782 R R R R  
ERR2041783 R R R R  
ERR2041784 R R R R  
ERR2041785 R R R R  
ERR2041786 R R R R  
ERR2041787 R R R R  
ERR2041788 R R S R  
ERR551300 S S S S  
ERR552373,ERR552374 R R S R  
ERR552299 S S S S  
ERR550805 S S S S  
ERR550759 S S S S

Supplementary I

ERR551518 S S S S  
ERR550676,ERR550675 R R R S  
ERR551099,ERR551100 R R S S  
ERR552805 S S S S  
ERS457155 S S S S  
ERS458034 S S S S  
ERS457942 S S S S  
ERR552663 S S S S  
ERR553149 S S S S  
ERR550951 S S S S  
ERR552166 S S S S  
ERR552218 S S S S  
ERR552350 S S S S  
ERR551291 S S S S  
SAMN05276441 S S S S  
SAMN05276333 S S S S  
SAMN05276332 S S S S  
SAMN05276370 S S S S  
SAMN05276411 S S S S  
ERR551213 S S S S  
SAMN05276430 S S S S  
SAMN05276500 S S S S  
SAMN05276409 S S S S  
SAMN05276346 S S S S  
SAMN05276382 R R R S  
SAMN05276344 S S S S  
SAMN05276559 S S S S  
SAMN05276389 S S S S  
SAMN05276503 S S S S  
SAMN05276366 S S S S  
SAMN05276508 S S S S  
SAMN05276356 R R R S  
SAMN05276542 S S S S  
SAMN05276336 S S S S  
SAMN05276493 R R R S  
SAMN05276338 S S S S  
SAMN05276502 S S S S  
SAMN05276460 S S S S  
SAMN05276399 S S S S  
SAMN05276501 S S S S  
SAMN05276319 S S S S  
SAMN05276438 S S S S  
SAMN05276349 S S S S  
SAMN05276367 S S S S  
SAMN05276379 S S S S  
SAMN05276355 S S S S  
ERR550695 S S S S  
ERR551936 S S S S  
ERR550731 S S S S  
ERR498353 ERR498354 ERR498355 S S S S  
ERR550733,ERR550732 R R S S  
ERR551417,ERR551418 R R R R  
ERR2200105 S S S U

Supplementary I

ERR552009 S S S S  
ERR552745 R R R R  
ERR551834 S S S S  
ERR552149 ERR552150 R R R R  
ERR552151 R R S R  
ERR552780 R R R U  
ERR551689 R S S S  
ERR551650 R R R S  
ERR553185 ERR553186 R R R U  
ERR2200106 S S S S  
ERR551940 S S S S  
ERR552100 S S S S  
ERR552944 R S S S  
ERR551696 S S S S  
ERR550776 S S S S  
ERR551260 S S S S  
ERR550621 S S S S  
ERR552969 S S S S  
ERR552443,ERR552442 R R S S  
ERR552600 S S S S  
ERR551094 S S S S  
ERR2200107 S S S S  
ERR551806,ERR551805,ERR551804 R R R R  
ERR551510,ERR551509 R R R U  
ERR552734,ERR552733 R R R S  
ERR550897,ERR550896 R R S S  
ERR552354 S S S S  
ERR553394,ERR553393 R R R R  
ERR551824 S S S S  
ERR551132,ERR551133 R R R R  
ERR2200108 S S S S  
ERR551624,ERR551623 R R R S  
ERR552839 S S S S  
ERR550624 S S S S  
ERR552209 S S S S  
ERR550737 S S S S  
ERR551747 S S S S  
ERR551158 S S S S  
ERR2200109 S S S S  
ERR552291 S S S S  
ERR550862 S S S S  
ERR550845 S S S S  
ERR553265 S S S S  
ERR552615 S S S S  
ERR498293 ERR498294 ERR498295 S S S S  
ERS458727 R S S S  
ERR552286,ERR552287 R R R S  
ERR551962 R S S S  
ERR551985,ERR551984 R R S S  
ERR552642 S S S S  
ERR1768638 R R R R  
ERR2200110 S S S S  
ERR552538 S S S S

Supplementary I

ERR553061 S S S R  
ERR552771,ERR552772 R R R U  
ERR552603,ERR552604 R R S R  
ERR551888,ERR551887 R R R R  
ERR551918,ERR551919 R R R R  
ERR551600,ERR551599 R R R S  
ERR552433,ERR552434 R R S S  
ERR552719,ERR552718 R R R S  
ERR551667,ERR551668 R R S S  
ERR551643,ERR551642 R R S S  
ERR551731,ERR551730 R R S S  
ERR552677 R R S S  
ERR552148,ERR552147 R R R R  
ERR551844,ERR551845 R R R S  
ERR550656 S S S S  
ERR550692 S S S S  
ERR551546 S S S S  
ERR551007 S S S S  
ERR2200111 S S S S  
ERR552107 S S S S  
ERR2200112 S S S S  
ERR551326 S S S S  
ERR551152 S S S S  
ERR551576 S S S S  
ERR552324 S S S S  
ERR895346 S S S S  
ERR550995 S S S S  
ERR551372,ERR551373 R R R S  
ERR550688 S S S S  
ERR550813 R R R U  
ERR553134 R R R R  
ERR553116 S R S S  
ERR553143 S S S S  
ERR552336 S S S S  
ERR551999 S S S S  
ERR2200113 S S S S  
ERR2200114 S S S S  
ERR551115 S S S S  
ERR552989 ERR552990 ERR552991 ERR552992 R R S S  
ERR2200115 S S S U  
ERR551240 ERR551241 R R R U  
ERR553232 R S S S  
ERR551564 S S S S  
ERR553299 S S S S  
ERR498383 ERR498384 S S S S  
ERR552699 S S S S  
ERR552661,ERR552660 R R R R  
ERR551191 S S S R  
ERR552342,ERR552341 R R S S  
ERR552793,ERR552794 R R R R  
ERR551321,ERR551320 R R R R  
ERR550743,ERR550744 R R R R  
ERR550667,ERR550669,ERR550668 R R R R

Supplementary I

ERR551211,ERR551210 R R R R  
ERR2200116 S S S S  
ERR550778,ERR550777,ERR550779 R R R R  
ERR550989,ERR550988,ERR550990 R R R R  
ERR552531,ERR552532,ERR552530 R R R R  
ERR551971 S S S S  
ERR550635 S S S S  
ERR552946 S S S S  
ERR550853 R S S S  
ERR553175 S S S S  
ERR550817 S S S S  
ERR551312 S S S S  
ERR551119 S S S S  
ERR553282 R R R R  
ERR2200117 S S S U  
ERR552463 R R S R  
ERR552789 R R S R  
ERR550708 S S S S  
ERR2200118 S S S U  
ERR551873 S S S S  
ERR552181,ERR552182 R R R U  
ERR2200119 S S S U  
ERR551871 S S S S  
ERR552851 S S S S  
ERR551798,ERR551797 R R S S  
ERR550748,ERR550749 R R S R  
ERR550841,ERR550842 R R R S  
ERR551437,ERR551436 R R S S  
ERR551377,ERR551379,ERR551378 R R S S  
ERR550649,ERR550648 R R R S  
ERR553192,ERR553191 R R S S  
ERR551532 S S S S  
ERR551648,ERR551649 R R S S  
ERR552631,ERR552632 R R R S  
ERR553086 S S S S  
ERR552033,ERR552032 R R S S  
ERR553184,ERR553183 R R R R  
ERR551996,ERR551994,ERR551995 R R R R  
ERR550706,ERR550707 R R R S  
ERR551431,ERR551432 R R S S  
ERR551108,ERR551109 R R S S  
ERR551745,ERR551744,ERR551743 R R S S  
ERR552068,ERR552067 R R S S  
ERR552190 S S S S  
ERR551385,ERR551384 R R S S  
ERR551020,ERR551019 R R R S  
ERR551464,ERR551465 R R S R  
ERR552842,ERR552841 R R R S  
ERR550770,ERR550771 R R S R  
ERR552595 S S S S  
ERR551198 S S S S  
ERR2200120 S S S S  
ERR2200121 S S S S



Supplementary I

ERR551061 S S S S  
 ERR2200122 ERR551111 ERR551112 S S S S  
 ERR2200123 S S S S  
 ERR551009 S S S R  
 ERR551058 S S S S  
 ERR551796 S S S S  
 ERR552153 S S S S  
 ERR552916 ERR552917 R R R U  
 ERR552070 R R R R  
 ERR553020 ERR553021 R R R R  
 ERR552809 R R R R  
 ERR550657 R S S S  
 ERR2200124 S S S S  
 ERR550943 S S S S  
 ERR552156 S S S S  
 ERR553327 S S S S  
 ERR553214 ERR553215 S S S S  
 ERS458461 R R R S  
 ERS457115 R S S S  
 ERS458043 R S S R  
 ERR551708,ERR551707 R R R S  
 ERR551128,ERR551129 R R R S  
 ERR2200125 S S S S  
 ERR551052,ERR551051 R R R S  
 ERR551264 ERR551265 S S S S  
 ERR552750 S S S S  
 ERR552674 S S S S  
 ERR552229 S S S S  
 ERR551165 S S S S  
 ERR553167 S S S S  
 ERR553034 S S S S  
 ERR550801 S S S S  
 ERR551860 R S S S  
 ERR551348 S S S S  
 ERR553309 S S S S  
 ERR552826 S S S S  
 ERR552072 S S S S  
 ERR551315 ERR551316 S S S S  
 ERR550672 S S S S  
 ERR552999 S S S S  
 ERR552401,ERR552400 R R R R  
 ERR552358 R R R S  
 ERR2200126 S S S S  
 ERR550664,ERR550663 R R R R  
 ERR551945,ERR551943,ERR551944 R R R R  
 ERR550682,ERR550681,ERR550683 R R R R  
 ERR552738,ERR552739 R R S S  
 ERR2200127 S S S S  
 ERR551352,ERR551353 R R R R  
 ERR550722 S S S S  
 ERR552258,ERR552257 R R R R  
 ERR553198,ERR553197 R R R S  
 ERR551536 R R R R

Supplementary I

ERR552986 ERR552987 R R R R  
ERR551298 ERR551299 R R S S  
ERR550763,ERR550762 R R R S  
ERR551447 S S S S  
ERR553135 S S S S  
ERR2200128 ERR2200129 S S S S  
ERR2200130 S S S S  
ERR552644 S S S S  
ERR552756 S S S S  
ERR551366 R R S S  
ERR552649 S S S S  
ERR553267 S S S S  
ERR551762 S S S S  
ERR2200131 S S S S  
ERR552713 S S S S  
ERR552539 R S S S  
ERR552180 S S S S  
ERR551864 S S S S  
ERR553259 S S S S  
ERR552744 S S S S  
ERR553390 S S S S  
ERR550673 S S S S  
ERR551503 S S S S  
ERR552716 S S S S  
ERR551658 S S S S  
ERR550810 S S S S  
ERR552762 S S S S  
ERR550844 S S S S  
ERR550662 S S S S  
ERR2200132 S S S S  
ERR550965 S S S S  
ERR2200133 S S S S  
ERR552837 S S S S  
ERR550991 S S S S  
ERR552541 S S S S  
ERR551482 S S S S  
ERR553091 S S S S  
ERR551818 S S S S  
ERR552205 S S S S  
ERR551297 S S S S  
ERR551865 ERR551866 S S S S  
ERR551565 S S S S  
ERR552803 S S S S  
ERR551872 S S S S  
ERR552476 S S S S  
ERR550639 ERR550640 S S S S  
ERR2200134 S S S S  
ERR553102 S S S S  
ERR552298,ERR552297 R R S S  
ERR552741,ERR552740 R R R S  
ERR552112,ERR552111 R R R S  
ERR551992 S S S S  
ERR552390,ERR552389 R R R R

Supplementary I

ERR552955,ERR552956 R R R R  
ERR2200135 ERR2200136 S S S S  
ERR550863 ERR550864 R R R R  
ERR2200137 ERR2200138 R R R R  
ERR553001 ERR553002 R R R R  
ERR2200139 S S S U  
ERR553311 S S S S  
ERR550910 S S S S  
ERR552203 S S S S  
ERR552524 S S S S  
ERR552995 S S S S  
ERR2200140 S S S S  
ERR551042 S S S S  
ERR553193 S S S S  
ERR552388 S S S S  
ERR552270 S S S S  
ERR551220,ERR551221 R R R S  
ERR553246,ERR553247 R R S S  
ERR551142,ERR551141 R R S R  
ERR551592,ERR551591 R R R R  
ERR551515,ERR551514,ERR551516 R R S S  
ERR552580 R R S S  
ERR550809,ERR550808 R R R S  
ERR551634,ERR551635 R R S S  
ERR550956 S S S S  
ERR552810 S S S S  
ERR551559 S S S S  
ERR2200141 S S S S  
ERR551127 S S S S  
ERR2200142 ERR2200143 S S S S  
ERR550717 S S S S  
ERR2200144 S S S S  
ERR552860 S S S S  
ERR2516559 R R R U  
ERR2516478 R R R R  
ERR2516482 R R R R  
ERR551603,ERR551604 R R R S  
ERR551365 S S S S  
ERR552102,ERR552101 R R R S  
ERR551293 R S S S  
ERR553308 S S S S  
ERR2200145 S S S S  
ERR551889 S S S S  
ERR2200146 ERR2200147 S S S S  
ERR553113 R S S S  
ERR552584 S S S S  
ERR553339 S S S S  
ERR551954 S S S S  
ERR551224 S S S S  
ERR2516527 R R R R  
ERR2516483 R U R U  
ERR2516614 R R R S  
ERR2516713 R R R U

Supplementary I

ERR2516499 R R R R  
ERR2516543 R R R R  
ERR2516590 R R R S  
ERR2516727 R R R R  
ERR2516460 R R R S  
ERR2516696 R R R R  
ERR2516663 R R R U  
ERR553388 S S S S  
ERR553249 S S S S  
ERR2041789 R R R R  
ERR2041790 ERR2041791 R R R R  
ERR2041792 ERR2041793 R R S S  
ERR2041794 R R S S  
ERR2041795 R R R S  
ERR2041796 R R R R  
ERR2041797 ERR2041798 R R R S  
ERR2041799 ERR2041800 R R S R  
ERR2041801 ERR2041802 R R R R  
ERR2200148 R R S R  
ERR2041803 R R R S  
ERR2041804 R R S S  
ERR2041805 R R S S  
ERR2200149 S S S S  
ERR552202 S S S S  
ERR552110 S S S S  
ERR551290 R R R R  
ERR552419 S S S S  
ERR552441 R R R R  
ERR550812 R R R R  
ERR551701 R R R R  
ERR552933 R R R R  
ERR552937 R R R S  
ERR552517 R R R R  
ERR551611,ERR551610 R R R R  
ERR552774 R R S R  
ERR553333 S S S S  
ERR2200150 ERR2200151 S S S S  
ERR551145 R R R R  
ERR551430 R R R R  
ERR552483 S S S S  
PRJNA413593 S S S U  
PRJNA413593 R R S U  
PRJNA413593 S S S U

















Supplementary I

PRJNA413593 S S S U  
PRJNA413593 R S S U  
PRJNA413593 S S S U  
PRJNA413593 S S S U  
PRJNA413593 S S S U  
PRJNA413593 R S S U  
PRJNA413593 S S S U  
PRJNA413593 R S S U  
PRJNA413593 R R R R  
PRJNA413593 S S S U  
PRJNA413593 R R R R  
PRJNA413593 S S S U  
PRJNA413593 S S R U  
PRJNA413593 R S S U  
PRJNA413593 S S S U  
PRJNA413593 S S S U  
PRJNA413593 S R S U  
PRJNA413593 R S S S  
PRJNA413593 R S S U  
PRJNA413593 S S S U



Supplementary I

PRJNA413593 S S S U  
PRJNA413593 R S S U  
PRJNA413593 R S S U  
PRJNA413593 S S S U  
PRJNA413593 S S S U  
PRJNA413593 S S S U  
PRJNA413593 R S S U  
PRJNA413593 S S S U  
PRJNA413593 R S S S  
PRJNA413593 S S S U  
PRJNA413593 R R R R



Supplementary I

PRJNA413593 S S S U  
PRJNA413593 R S S U  
PRJNA413593 S S S U  
PRJNA413593 R S S U  
PRJNA413593 S S S U  
PRJNA413593 S S S U  
PRJNA413593 R S S U  
PRJNA413593 S S S U  
PRJNA413593 R S S U  
PRJNA413593 S S S U



Supplementary I

PRJNA413593 S S S U  
PRJNA413593 R S S U  
PRJNA413593 S S S U  
PRJNA413593 R S S S  
PRJNA413593 S S S U  
PRJNA413593 R S S S  
PRJNA413593 R S S S  
PRJNA413593 S S S U  
PRJNA413593 R S S S  
PRJNA413593 S S S U  
PRJNA413593 R S S U  
PRJNA413593 S S S U  
PRJNA413593 R S S S  
PRJNA413593 S S S U  
PRJNA413593 S S S U

Supplementary I

PRJNA413593 S S S U  
PRJNA413593 S S S U  
PRJNA413593 R S S S  
PRJNA413593 R S S S  
PRJNA413593 S S S U  
PRJNA413593 S S S U  
PRJNA413593 S S S U  
ERR2516053 S S S S  
ERR2515930 S S S S  
ERR2515940 S S S S  
ERR2515330 S S S S  
ERR2515219 S S S S  
ERR2516016 S S S S  
ERR2515272 S S S S  
ERR2515795 S S S S  
ERR2515229 S S S S  
ERR2515888 S S S S  
ERR2515534 S S S S  
ERR2515490 S S S S  
ERR2515771 S S S S  
ERR2515524 S S S S  
ERR2515855 S S S S  
ERR2515935 S S S S  
ERR2515848 S S S S  
ERR2515556 S S S S  
ERR2516054 S S S S  
ERR2515757 S S S S  
ERR2515657 S S S S  
ERR2515631 S S S S  
ERR2515704 S S U S  
ERR2516079 S S S U  
ERR2515941 S S S S  
ERR2515146 S S S S  
ERR2515942 S S S S  
ERR2515401 S S S S  
ERR2515170 S S S S  
ERR2516046 S S S S  
ERR2516011 R S S S  
ERR2515364 S S S S  
ERR2515925 S S S S  
ERR2515581 S S S S  
ERR2515408 R S S S  
ERR2515765 S S S S  
ERR2515716 S S S S  
ERR2515957 S S S R  
ERR2515955 S S S S  
ERR2515334 S S S S  
ERR2515604 S S S S  
ERR2515944 S S S S  
ERR2515886 S S S S  
ERR2515477 S S S S  
ERR2515195 S R S S  
ERR2515741 S S S S

Supplementary I

ERR2515416 S S S S  
ERR2515177 S S S S  
ERR2516072 S S S S  
ERR2515662 S S S R  
ERR2515649 S S S S  
ERR2516015 S S S S  
ERR2515607 S S S S  
ERR2515678 S S S S  
ERR2516083 S S S S  
ERR2515830 S S S S  
ERR2515939 S S S S  
ERR2515630 S S S S  
ERR2515216 S S S S  
ERR2515418 S S S S  
ERR2515762 S S S S  
ERR2515242 R R R S  
ERR2515695 S S S S  
ERR2515586 S S S S  
ERR2515484 S S S S  
ERR2515807 S S S S  
ERR2515269 S S S S  
ERR2515800 S S S S  
ERR2515452 S S S S  
ERR2515374 S S S S  
ERR2515321 S S S S  
ERR2515896 S S S S  
ERR2515675 S S S S  
ERR2515998 S S S S  
ERR2515644 S S S S  
ERR2515619 S S S S  
ERR2515959 S S S S  
ERR2515721 S S S S  
ERR2515766 S S S S  
ERR2515328 S S S S  
ERR2515460 S S S S  
ERR2515788 S S S S  
ERR2515923 S S S S  
ERR2516043 R R S R  
ERR2515863 S S S S  
ERR2515927 S S S S  
ERR2515282 S S S S  
ERR2516078 S R S S  
ERR2516027 R S S R  
ERR2515406 S S S S  
ERR2515887 S S S S  
ERR2515474 R R R R  
ERR2515145 S S S S  
ERR2516098 S S S S  
ERR2515387 S R S S  
ERR2515427 R S S U  
ERR2515179 S S S S  
ERR2515548 S S S S  
ERR2515694 S S S S

Supplementary I

ERR2515921 S S S S  
ERR2516013 S S S S  
ERR2515753 S S S S  
ERR2515799 S S S S  
ERR2515922 S S S S  
ERR2516009 S S S S  
ERR2515549 S S S S  
ERR2515947 S S S S  
ERR2515495 S S S S  
ERR2515281 S S S S  
ERR2515760 S S S S  
ERR2515850 S S S S  
ERR2516033 S S S S  
ERR2515234 S S S S  
ERR2515398 S S S S  
ERR2515239 S S S S  
ERR2515150 S S S S  
ERR2515557 S S S S  
ERR2515285 S S S S  
ERR2515531 S S S S  
ERR2515876 S S S S  
ERR2515892 S S S S  
ERR2515292 R S S S  
ERR2516093 S S S S  
ERR2515824 S S S S  
ERR2515601 S S S S  
ERR2515472 S S S S  
ERR2516092 S S S S  
ERR2515465 R R R R  
ERR2515203 S S S S  
ERR2515750 S S S S  
ERR2515987 S S S S  
ERR2515994 S S S S  
ERR2515279 S S S S  
ERR2516038 R S S S  
ERR2515844 S S S S  
ERR2515825 S S S S  
ERR2515637 R R S S  
ERR2515500 S S S S  
ERR2515700 S S S S  
ERR2516036 S S S S  
ERR2515526 S S S S  
ERR2515113 S S S S  
ERR2515355 S S S S  
ERR2515230 S S S S  
ERR2516070 R R S R  
ERR2515273 S S S S  
ERR2515470 S S S S  
ERR2515318 S S S S  
ERR2515108 S S S S  
ERR2515814 S S S S  
ERR2515690 S S S S  
ERR2516044 S S S S

Supplementary I

ERR2515908 S S S S  
ERR2515274 S S S S  
ERR2515308 S S S S  
ERR2515772 S S S S  
ERR2515287 S S S S  
ERR2515533 S S S S  
ERR2515943 S S S U  
ERR2515672 S S S S  
ERR2515629 S S S S  
ERR2515288 S S S S  
ERR2515817 S S S S  
ERR2515142 S S U S  
ERR2515986 S S S S  
ERR2515599 S S S S  
ERR2515671 S S S S  
ERR2515999 S S S S  
ERR2515641 S S S U  
SRR671775 S S S U  
SRR671722 R R S U  
SRR671721 R R R U  
SRR671868 R R R U  
SRR671869 R R S U  
SRR671867 R R S U  
SRR671865 R R R U  
SRR671724 R R R U  
SRR671720 R R R U  
SRR671866 R R R U  
SRR671780 R R S U  
SRR671779 R R S U  
SRR671776 S S S U  
SRR671777 S S S U  
SRR671778 S S S U  
SRR671719 R R R U  
SRR671727 R R S U  
SRR671723 S S S U  
SRR671858 S S S U  
SRR671859 S S S U  
SRR671860 S S S U  
SRR671728 R R R U  
SRR671729 S S S U  
SRR671730 S S S U  
SRR671731 R R S U  
SRR671762 S S S U  
SRR671748 R R R U  
SRR671749 R R S U  
SRR671750 R R S U  
SRR671751 R R R U  
SRR671752 R R S U  
SRR671841 R R R U  
SRR671753 R R S U  
SRR671758 R R S U  
SRR671757 R R S U  
SRR671759 R R R U

Supplementary I

SRR671763 S S S U  
SRR671832 S S S U  
SRR671764 S S S U  
SRR671760 R R S U  
SRR671755 R R S U  
SRR671842 R R R U  
SRR671756 R R R U  
SRR671754 R R R U  
SRR671761 R R R U  
SRR671732 R R R U  
SRR671833 S S S U  
SRR671843 R R S U  
SRR671834 R R R U  
SRR671835 S S S U  
SRR671769 R R R U  
SRR671772 R R R U  
SRR671770 R R R U  
SRR671767 R R R U  
SRR671765 R R R U  
SRR671844 R R R U  
SRR671771 R R R U  
SRR671774 R R S U  
SRR671766 R R R U  
SRR671768 R R S U  
SRR671773 S S S U  
SRR671845 R R R U  
SRR671836 R R S U  
SRR671837 R R R U  
SRR671846 S S S U  
SRR671847 R R S U  
SRR671863 R R R U  
SRR671861 R R S U  
SRR671864 R R R U  
SRR671862 R R R U  
SRR671789 R R S U  
SRR671783 R R R U  
SRR671790 R R R U  
SRR671782 R R R U  
SRR671725 R R R U  
SRR671726 R R R U  
SRR671733 R R S U  
SRR671857 R R R U  
SRR671856 S S S U  
SRR671734 R R S U  
SRR671735 R R S U  
SRR671736 R R S U  
SRR671784 R R S U  
SRR671788 S S S U  
SRR671855 R R R U  
SRR671781 R R R U  
SRR671786 S S S U  
SRR671787 R R R U  
SRR671785 R R R U

Supplementary I

SRR671794 R R R U  
SRR671792 S S S U  
SRR671800 S S S U  
SRR671797 R R R U  
SRR671796 R R R U  
SRR671829 R R S U  
SRR671799 R R R U  
SRR671801 R R S U  
SRR671791 R R S U  
SRR671854 R R R U  
SRR671737 R R R U  
SRR671739 R R R U  
SRR671879 S S S U  
SRR671870 S S S U  
SRR671875 S S S U  
SRR671877 S S S U  
SRR671876 S S S U  
SRR671740 R R S U  
SRR671741 S S S U  
SRR671742 R R S U  
SRR671743 R R S U  
SRR671744 R R S U  
SRR671804 R R R U  
SRR671827 S S S U  
SRR671810 R R R U  
SRR671811 R R R U  
SRR671805 S S S U  
SRR671806 R R R U  
SRR671807 R R R U  
SRR671808 S S S U  
SRR671809 R R R U  
SRR671812 R R S U  
SRR671813 R R R U  
SRR671814 S S S U  
SRR671815 R R R U  
SRR671816 R R S U  
SRR671817 R R S U  
SRR671818 R R R U  
SRR671819 R R S U  
SRR671820 R R S U  
SRR671821 R R R U  
SRR671822 R R R U  
SRR671823 S S S U  
SRR671824 R R S U  
SRR671825 R R R U  
SRR671826 R R R U  
SRR671828 R R S U  
SRR671853 R R R U  
SRR671852 R R S U  
SRR671795 R R S U  
SRR671830 S S S U  
SRR671831 R R S U  
SRR671802 S S S U

Supplementary I

SRR671793 S S S U  
SRR671798 R R S U  
SRR671803 S S S U  
SRR671745 R R S U  
SRR671746 R R S U  
SRR671738 R R S U  
SRR671871 S S S U  
SRR671873 S S S U  
SRR671878 S S S U  
SRR671872 S S S U  
SRR671874 S S S U  
SRR671848 R R S U  
SRR671838 R R S U  
SRR671849 R R R U  
SRR671839 R R R U  
SRR671850 R R R U  
SRR671851 R R R U  
SRR671840 R R R U  
SRR671747 S S S U  
ERR2515879 S S S S  
ERR2515953 S S S S  
ERR2515595 S S S S  
ERR2515976 R S S S  
ERR2515912 S S S S  
ERR2515713 R R S R  
ERR2515989 S S S S  
ERR2515313 S S S S  
ERR2516006 S R S S  
ERR2516099 S S S S  
ERR2515873 S S S S  
ERR2516065 S S S S  
ERR2515489 S S S S  
ERR2515491 R S S S  
ERR2515208 S S S S  
ERR2515610 S S S S  
ERR2515569 S S S S  
ERR2515685 S S S S  
ERR2516047 R R R R  
ERR2515169 R S S S  
ERR2515598 S S S S  
ERR2515958 S S S S  
ERR2515784 S S S S  
ERR2515875 S S S S  
ERR2515854 S S S S  
ERR2515305 S S S S  
ERR2515136 S S S S  
ERR2515587 S S S S  
ERR2515600 S S S S  
ERR2515525 S S S S  
ERR2515532 R R S S  
ERR2515180 S S S S  
ERR2515728 S S S S  
ERR2515324 S S S S



Supplementary I

ERR2515906 S S S S  
ERR2515385 R S S S  
ERR2515501 S S S S  
ERR2515632 S S S S  
ERR2515449 R S S S  
ERR2515158 S S S S  
ERR2515960 S S S S  
ERR2515326 S S S S  
ERR2515834 R U S U  
ERR2515327 S S S S  
ERR2515397 S S S S  
ERR2515654 S S S S  
ERR2515403 S S S S  
ERR2515734 S S S S  
ERR2515505 S S S S  
ERR2515787 S S S S  
ERR2515457 S S S S  
ERR2515579 S S S S  
ERR2515919 S S S S  
ERR2515212 S S S S  
ERR2515639 S S S S  
ERR2515106 S S S S  
ERR2515602 S S S S  
ERR2515847 S S S S  
ERR2515414 S S S S  
ERR2516101 S S R S  
ERR2515992 S S S S  
ERR2515871 S S S S  
ERR2515275 S S S S  
ERR2515946 S S S S  
ERR2515235 S S S S  
ERR2515232 S S S S  
ERR2516008 R R S R  
ERR2515110 S S S S  
ERR2515139 S S S S  
ERR2516095 S S S S  
ERR2515699 S S S S  
ERR2515894 S S S S  
ERR2515151 S S S S  
ERR2515149 S S S S  
ERR2516087 S S S S  
ERR2515412 S S S S  
ERR2515214 S S S S  
ERR2515422 S S S S  
ERR2515669 S U S S  
ERR2515167 S S S S  
ERR2515431 S S S S  
ERR2515260 S S S S  
ERR2515566 R S S S  
ERR2515717 R S S S  
ERR2515432 S S S S  
ERR2516035 S S S S  
ERR2515140 S S S S

Supplementary I

ERR2515837 R S S U  
ERR2515884 S S S S  
ERR2515698 S S S S  
ERR2515570 S S S S  
ERR2515849 S S S S  
ERR2515733 S S S S  
ERR2515295 S S S S  
ERR2515122 S S S S  
ERR2515877 S S S S  
ERR2515443 S S S S  
ERR2515383 S S S S  
ERR2515529 S S S S  
ERR2515974 S S S R  
ERR2516100 S S S S  
ERR2515782 S S S S  
ERR2515592 S S S S  
ERR2515222 S S S S  
ERR2515975 S S S S  
ERR2516075 S S S S  
ERR2515399 S S S S  
ERR2515265 R R R R  
ERR2515499 S S S S  
ERR2515823 S S S S  
ERR2515625 S S S S  
ERR2515521 S S S S  
ERR2515200 S S S S  
ERR2515655 S S S S  
ERR2516096 S S S S  
ERR2516002 S S S S  
ERR2515993 R S S S  
ERR2515420 S S S S  
ERR2515240 S S S S  
ERR2515502 S S S S  
ERR2516022 S S S S  
ERR2515967 S S S S  
ERR2516058 S S S S  
ERR2515881 R R S S  
ERR2515271 S S S U  
ERR2515786 S S S S  
ERR2516089 S S S S  
ERR2515808 S S S S  
ERR2515578 S S S S  
ERR2515341 S S S S  
ERR2515832 S S S S  
ERR2515676 S S S S  
ERR2515440 S S S S  
ERR2515846 S S S S  
ERR2515297 S S S S  
ERR2515977 S S S S  
ERR2515861 S S S S  
ERR2515897 S S S S  
ERR2515206 S S S S  
ERR2515365 S S S S

Supplementary I

ERR2515157 S S S S  
ERR2515481 S S S S  
ERR2515712 S S S S  
ERR2515315 S S S S  
ERR2515447 S S S S  
ERR2516061 S S S S  
ERR2515309 S S S S  
ERR2515197 S S S S  
ERR2515253 S S S S  
ERR2515538 S S S S  
ERR2515236 S S S S  
ERR2515635 S S S S  
ERR2515805 S S S S  
ERR2515726 S S S S  
ERR2515840 S S S S  
ERR2515605 S S S S  
ERR2516021 S S S S  
ERR2515444 S S S S  
ERR2515132 S S S S  
ERR2515613 S S S S  
ERR2515880 S S S S  
ERR2515300 S S S S  
SAMN03647097 S S S S  
SAMN03647098 S S S S  
SAMN03647099 S S S S  
SAMN03647100 S S S S  
SAMN03647101 S S S S  
SAMN03647102 S S S S  
SAMN03647103 S S S S  
SAMN03647104 S S S S  
SAMN03647105 S S S S  
SAMN03647106 S S S S  
SAMN03647107 S S S S  
SAMN03647108 S S S S  
SAMN03647109 S S S S  
SAMN03647110 S S S S  
SAMN03647111 S S S S  
SAMN03647112 S S S S  
SAMN03647113 S S S S  
SAMN03647114 S S S S  
SAMN03647115 S S S S  
SAMN03647116 S S S S  
SAMN03647117 S S S S  
SAMN03647118 S S S S  
SAMN03647119 S S S S  
SAMN03647120 S S S S  
SAMN03647121 S S S S  
SAMN03647122 R R S S  
SAMN03647123 S S S S  
SAMN03647124 S S S S  
SAMN03647125 S S S S  
SAMN03647126 S S S S  
SAMN03647127 S S S S

Supplementary I

SAMN03647128 S S S  
SAMN03647129 R R S S  
SAMN03647130 S S S S  
SAMN03647131 R S S S  
SAMN03647132 R S S S  
SAMN03647133 R S S S  
SAMN03647134 R S S S  
SAMN03647135 S S S  
SAMN03647136 R S S S  
SAMN03647137 R S S S  
SAMN03647138 R S S S  
SAMN03647139 R S S S  
SAMN03647140 R S S S  
SAMN03647141 R S S S  
SAMN03647142 R R R R  
SAMN03647143 R S S S  
SAMN03647144 R S S S  
SAMN03647145 S R R  
SAMN03647146 R S S S  
SAMN03647147 R R R S  
SAMN03647148 R S S S  
SAMN03647149 R R S S  
SAMN03647150 R S S S  
SAMN03647151 R R S S  
SAMN03647152 R S S S  
SAMN03647153 R S S S  
SAMN03647154 R S S S  
SAMN03647155 R R S S  
SAMN03647156 R S S S  
SAMN03647157 R S S S  
SAMN03647158 R S S S  
SAMN03647159 R S S S  
SAMN03647160 R S S S  
SAMN03647161 R S S S  
SAMN03647162 R S S S  
SAMN03647163 S S S S  
SAMN03647164 S S S S  
SAMN03647165 S S S S  
SAMN03647166 S S S S  
SAMN03647167 S S S S  
SAMN03647168 S S S S  
SAMN03647169 S S S S  
SAMN03647170 S S S S  
SAMN03647171 S S S S  
SAMN03647172 S S S S  
SAMN03647173 S S S S  
SAMN03647174 S S S S  
SAMN03647175 S S S S  
SAMN03647176 S S S S  
SAMN03647177 S S S S  
SAMN03647178 S S S S  
SAMN03647179 R S S S  
SAMN03647180 S S S S

Supplementary I

SAMN03647181 S S S S  
SAMN03647182 S S S S  
SAMN03647183 S S S S  
SAMN03647184 S S S S  
SAMN03647185 S S S S  
SAMN03647186 S S S S  
SAMN03647187 S S S S  
SAMN03647188 R S S S  
SAMN03647189 S S S S  
SAMN03647190 S S S S  
SAMN03647191 S S S S  
SAMN03647192 S S S S  
SAMN03647193 S S S S  
SAMN03647194 R R S S  
SAMN03647195 S S S S  
SAMN03647196 S S S S  
SAMN03647197 S S S S  
SAMN03647198 S S S S  
SAMN03647199 R R S S  
SAMN03647200 S S S S  
SAMN03647201 S S S S  
SAMN03647202 S S S S  
SAMN03647203 S S S S  
SAMN03647204 R S S S  
SAMN03647205 R S S S  
SAMN03647206 S S S S  
SAMN03647207 S S S S  
SAMN03647208 S S S S  
SAMN03647209 S S S S  
SAMN03647210 S S S S  
SAMN03647211 S S S S  
SAMN03647212 S S S S  
SAMN03647213 S S S S  
SAMN03647214 S S S S  
SAMN03647215 S S S S  
SAMN03647216 S S S S  
SAMN03647217 S S S S  
SAMN03647218 S S S S  
SAMN03647219 S S S S  
SAMN03647220 S S S S  
SAMN03647221 S S S S  
SAMN03647222 S S S S  
SAMN03647223 S S S S  
SAMN03647224 S S S S  
SAMN03647225 S S S S  
SAMN03647226 S S S S  
SAMN03647227 S S S S  
SAMN03647228 S S S S  
SAMN03647229 S S S S  
SAMN03647230 S S S S  
SAMN03647231 R S S S  
SAMN03647232 S S S S  
SAMN03647233 S S S S

Supplementary I

SAMN03647234 S S S S  
SAMN03647235 S S S S  
SAMN03647236 S S S S  
SAMN03647237 S S S S  
SAMN03647238 R S S S  
ERR025833 S S S S  
ERR025834 S S S S  
ERR025835 S S S S  
ERR025836 S S S S  
ERR025837 S S S S  
ERR025838 S S S S  
ERR025839 S S S S  
ERR025842 S S S S  
ERR025843 S S S S  
ERR025844 S S S S  
ERR025846 S S S S  
ERR025847 S S S S  
ERR025848 S S S S  
ERR038254 S S S S  
ERR038255 S S S S  
ERR038256 S S S S  
ERR038257 S S S S  
ERR038258 S S S S  
ERR038259 S S S S  
ERR038260 S S S S  
ERR038261 S S S S  
ERR038262 S S S S  
ERR038263 S S S S  
ERR038264 S S S S  
ERR038265 S S S S  
ERR038266 S S S S  
SAMN03647239 S S S S  
ERR038269 S S S S  
ERR038270 S S S S  
ERR038271 S S S S  
ERR038272 S S S S  
ERR038273 S S S S  
ERR038274 S S S S  
ERR038275 S S S S  
ERR038276 S S S S  
ERR038277 S S S S  
ERR038278 S S S S  
ERR038279 S S S S  
ERR038280 S S S S  
ERR038281 S S S S  
ERR038282 S S S S  
ERR038283 S S S S  
ERR038284 S S S S  
ERR038285 S S S S  
ERR038286 S S S S  
ERR038287 S S S S  
ERR038288 S S S S  
SAMN03647240 S S S S

Supplementary I

ERR038290 S S S S  
ERR038291 S S S S  
ERR038292 S S S S  
ERR038293 S S S S  
ERR038294 S S S S  
ERR038295 S S S S  
ERR038296 S S S S  
ERR038298 S S S S  
ERR038299 S S S S  
ERR038300 S S S S  
ERR039323 S S S S  
ERR039324 S S S S  
ERR039325 S S S S  
ERR039326 S S S S  
ERR039327 S S S S  
ERR039328 S S S S  
ERR039329 S S S S  
ERR039330 S S S S  
ERR039331 S S S S  
ERR039332 S S S S  
ERR039333 S S S S  
ERR039334 S S S S  
ERR039335 S S S S  
ERR039336 S S S S  
ERR039337 S S S S  
ERR039338 S S S S  
ERR039339 S S S S  
ERR039340 S S S S  
ERR039341 S S S S  
ERR039342 S S S S  
ERR039343 S S S S  
ERR039344 S S S S  
ERR039345 S S S S  
ERR039346 S S S S  
ERR040086 S S S S  
ERR040087 S S S S  
ERR040088 S S S S  
ERR040089 S S S S  
ERR040090 S S S S  
ERR040091 S S S S  
SAMN03647241 S S S S  
ERR040093 S S S S  
ERR040094 S S S S  
ERR040095 S S S S  
ERR040096 S S S S  
ERR040097 S S S S  
ERR040098 S S S S  
ERR040099 S S S S  
ERR040100 S S S S  
ERR040101 S S S S  
ERR040102 S S S S  
ERR040103 S S S S  
ERR040104 S S S S

Supplementary I

ERR040105 R S S S  
ERR040106 S S S S  
ERR040107 S S S S  
ERR040108 S S S S  
ERR040109 S S S S  
ERR046729 S S S S  
ERR046730 R S S S  
SAMN03647242 S S S S  
ERR046732 S S S S  
ERR046733 S S S S  
ERR046734 S S S S  
ERR046735 S S S S  
ERR046736 S S S S  
ERR046737 S S S S  
ERR046738 S S S S  
ERR046739 S S S S  
SAMN03647243 S S S S  
ERR046741 S S S S  
SAMN03647244 S S S S  
ERR046743 S S S S  
ERR046744 S S S S  
ERR046745 S S S S  
ERR046746 S S S S  
ERR046747 S S S R  
ERR046748 S S S R  
ERR046749 S S S R  
SAMN03647245 S S S R  
ERR046751 S S S S  
ERR046752 S S S S  
ERR046753 S S S S  
ERR046754 S S S S  
ERR046755 S S S S  
ERR046756 S S S S  
SAMN03647246 S S S S  
ERR046758 S S S S  
ERR046759 S S S S  
ERR046760 S S S S  
ERR046761 S S S S  
ERR046762 S S S S  
ERR046763 S S S S  
ERR046764 S S S S  
ERR046765 S S S S  
ERR046766 S S S S  
ERR046767 S S S S  
ERR046768 S S S S  
ERR046769 S S S S  
ERR046770 S S S S  
ERR046771 S S S S  
ERR046772 S S S S  
ERR046773 S S S S  
SAMN03647247 S S S R  
ERR046775 S S S S  
ERR046776 S S S S



Supplementary I

ERR046777 S S S S  
ERR046778 R S S S  
ERR046779 S S S S  
ERR046780 R S S S  
ERR046781 S S S S  
ERR046782 S S S S  
ERR046783 S S S S  
ERR046784 R S R S  
ERR046785 S S S S  
ERR046786 R S S S  
ERR046788 R S S S  
ERR046789 R S S S  
ERR046791 S S S S  
ERR046792 S S R S  
ERR046794 S S S S  
ERR046795 S S S S  
ERR046796 R R R R  
ERR046797 S S S S  
ERR046798 S S S S  
ERR046799 S S S S  
ERR046800 S S S S  
SAMN03647248 S S S S  
SAMN03647249 S S S S  
SAMN03647250 S S S S  
SAMN03647251 S S S S  
SAMN03647252 S S S S  
SAMN03647253 S S S S  
SAMN03647254 S S S S  
SAMN03647255 S S S S  
SAMN03647256 S S S S  
SAMN03647257 S S S S  
SAMN03647258 S S S S  
SAMN03647259 S S S S  
SAMN03647260 S S S S  
ERR046819 S S S S  
ERR046820 S S S S  
ERR046821 R R S U  
ERR046822 S S S S  
ERR046823 S S S S  
ERR046824 S S S S  
ERR046825 S R S S  
SAMN03647261 S S S S  
SAMN03647262 S S S S  
SAMN03647263 S S S S  
SAMN03647264 S S S S  
ERR046831 S S S S  
ERR046832 S S S S  
ERR046834 R S S S  
ERR046837 S S S S  
ERR046838 S S S S  
ERR046839 S S S S  
ERR046840 S S S S  
ERR046841 S S S S

Supplementary I

ERR046842 S S S S  
ERR046843 S S S S  
ERR046844 S S S S  
ERR046845 S S S S  
ERR046846 S S S S  
ERR046847 S S S S  
ERR046849 S S S S  
ERR046850 S S S S  
ERR046851 S S S S  
ERR046852 S S S S  
ERR046853 S S S S  
ERR046854 S S S S  
ERR046855 R R S S  
ERR046857 S S S S  
ERR046858 S S S S  
ERR046859 S S S S  
ERR046860 S S S S  
ERR046861 S S S S  
ERR046862 S S S S  
ERR046863 S S S S  
ERR046864 S S S S  
ERR046865 S S S S  
ERR046866 S S S S  
ERR046867 S S S S  
ERR046869 S S S S  
ERR046871 S S S S  
ERR046872 S S S S  
ERR046873 S S S S  
ERR046874 S S S S  
ERR046875 S S S S  
ERR046876 S S S S  
ERR046877 S S S S  
ERR046878 S S S S  
ERR046879 S S S S  
ERR046880 S S S S  
ERR046881 S S S S  
ERR046882 S S S S  
ERR046883 S S S S  
ERR046884 S S S S  
ERR046885 S S S S  
ERR046898 S S S S  
ERR046887 S S S S  
ERR046888 S S S S  
ERR046889 S S S S  
ERR046890 S S S S  
ERR046891 S S S S  
ERR046893 S S S S  
ERR046894 S S S S  
ERR046895 S S S S  
ERR046897 S S S S  
ERR046833 S S S S  
SAMN03647265 S S S S  
ERR046901 S S S S

Supplementary I

ERR046903 R R R R  
ERR046904 S S S S  
ERR046905 S S S S  
ERR046907 S S S S  
ERR046908 S S S S  
ERR046910 S S S S  
ERR046911 S S R S  
ERR046912 S S S S  
ERR046913 S S R S  
ERR046914 S S S S  
ERR046915 S S S S  
ERR046916 S S S S  
ERR046917 R R R R  
ERR046918 S S S S  
ERR046919 S S S S  
ERR046920 S S S S  
ERR046921 S S S S  
ERR046922 S S S S  
ERR046923 S S S S  
ERR046924 S S S S  
ERR046925 S S S S  
ERR046926 S S S S  
ERR046928 S S S S  
ERR046929 S S S S  
ERR046930 S S S S  
SAMN03647266 S S S S  
ERR046932 S S S S  
ERR046933 R U U S  
ERR046936 S S S S  
ERR046937 U U S U  
ERR046938 S S S S  
ERR046939 S S S S  
ERR046940 S S S S  
ERR046941 S S S S  
ERR046942 S S S S  
ERR046943 R R S S  
ERR046945 S S S S  
ERR046946 S S S S  
ERR046947 S S S S  
ERR046948 S S S S  
ERR046949 S S S S  
ERR046950 S S S S  
ERR046951 S S S S  
ERR046952 S S S S  
ERR046953 S S S S  
ERR046954 S S S R  
SAMN03647267 S S S S  
ERR046957 S S S S  
ERR046958 S S S S  
ERR046959 S S S S  
ERR046960 S S S S  
ERR046961 S S S R  
ERR046963 S S S S

Supplementary I

ERR046964 S S S S  
ERR046965 S S S S  
ERR046966 S S S S  
ERR046967 S S S S  
ERR046968 S S S S  
ERR046969 S S S S  
ERR046970 S S S S  
ERR046971 S S S S  
ERR046972 S S S S  
SAMN03647268 S S S S  
ERR046974 S S S S  
ERR046975 S S S S  
SAMN03647269 S S S S  
SAMN03647270 R S S R  
SAMN03647271 S S S S  
SAMN03647272 S S S S  
ERR046980 S S S S  
ERR046981 R S S S  
ERR046982 S S S S  
ERR046983 S S S S  
SAMN03647273 S S S S  
SAMN03647274 R R S S  
ERR046986 R S S S  
SAMN03647275 S S S S  
ERR046988 S S S S  
ERR046989 S S S R  
ERR046990 S S S S  
ERR046991 S S S S  
ERR046992 S S S S  
ERR046993 S S S S  
ERR046994 S S S S  
ERR046995 S S S S  
ERR046996 S S S S  
ERR046997 S S S S  
ERR046998 S S S S  
ERR046999 S S S S  
ERR047000 S S S S  
ERR047002 R S S S  
ERR047003 S S S S  
ERR047004 S S S S  
ERR047005 S S S S  
ERR047006 S S S S  
ERR047007 S S S S  
ERR047008 S S S S  
ERR047009 S S S S  
ERR047010 S S S S  
ERR047011 S S S S  
ERR047012 S S S S  
ERR047013 S S S S  
ERR047014 S S S S  
SAMN03647276 S S S S  
ERR047016 S S S S  
ERR072089 S S S S

Supplementary I

SAMN03647277 S S S S  
SAMN03647278 S S S S  
ERR072019 S S S S  
ERR072020 S S S S  
ERR072021 S S S S  
ERR072022 S S S S  
ERR072023 S S S S  
ERR072024 S S S S  
ERR072025 S S S S  
ERR072026 S S S S  
ERR072027 S S S S  
ERR072028 S S S S  
ERR072029 S S S S  
ERR072030 S S S S  
ERR072031 S S S S  
ERR072032 S S S S  
ERR072034 S S S S  
ERR072035 S S S S  
ERR072036 S S S S  
ERR072037 S S S U  
ERR072038 S S S S  
ERR072039 S S S S  
ERR072040 S S S S  
ERR072041 S S S S  
ERR072042 S S S S  
SAMN03647279 S S S S  
ERR072044 S S S S  
ERR072045 S S S S  
ERR072046 S S S S  
ERR072047 S S S S  
ERR072048 S S S S  
SAMN03647280 S S S S  
ERR072050 S S S S  
ERR072051 S S S S  
SAMN03647281 R S S S  
SAMN03647282 S S S S  
SAMN03647283 S S S S  
SAMN03647284 S S S S  
SAMN03647285 S S S S  
SAMN03647286 S S S S  
SAMN03647287 S S S S  
SAMN03647288 S S S S  
SAMN03647289 S S S S  
SAMN03647290 S S S S  
ERR072065 S S S S  
SAMN03647291 S S S S  
SAMN03647292 S S S S  
SAMN03647293 S S S S  
SAMN03647294 S S S S  
SAMN03647295 S S S S  
SAMN03647296 S S S S  
ERR072072 S S S S  
SAMN03647297 S S S S

Supplementary I

SAMN03647298 S S S S  
SAMN03647299 S S S S  
SAMN03647300 S S S S  
ERR072077 S S S S  
SAMN03647301 S S S S  
SAMN03647302 S S S S  
ERR072080 S S S S  
SAMN03647303 S S S S  
SAMN03647304 R S S R  
SAMN03647305 R R R R  
SAMN03647306 S S S S  
SAMN03647307 S S S S  
ERR072087 S S S S  
SAMN03647308 S S S S  
SAMN03647309 S S S S  
SAMN03647310 S S S S  
SAMN03647311 S S S S  
ERR072094 S S S S  
ERR072095 S S S S  
ERR072096 S S S S  
SAMN03647312 S S S S  
SAMN03647313 S S S S  
SAMN03647314 S S S S  
SAMN03647315 S S S S  
SAMN03647316 S S S S  
SAMN03647317 S S S S  
ERS389340 R R R R  
ERS389341 S S S S  
SAMN03647318 S S S S  
SAMN03647319 S S S S  
SAMN03647320 S S S S  
SAMN03647321 R S S S  
SAMN03647322 R S S U  
SAMN03647323 S S S S  
SAMN03647324 S S S S  
SAMN03647325 S S S S  
SAMN03647326 S S S S  
SAMN03647327 S S S S  
SAMN03647328 S S S S  
SAMN03647329 R S S S  
SAMN03647330 R S S S  
SAMN03647331 R S S S  
SAMN03647332 R S S S  
SAMN03647333 S S S S  
SAMN03647334 S S S S  
SAMN03647335 S S S S  
SAMN03647336 S S S S  
SAMN03647337 S S S S  
SAMN03647338 S S S S  
SAMN03647339 R S S S  
SAMN03647340 R S S S  
SAMN03647341 R S S S  
SAMN03647342 S S S S

Supplementary I

SAMN03647343 S S S S  
SAMN03647344 S S S S  
SAMN03647345 S S S S  
SAMN03647346 S S S S  
SAMN03647347 S S S S  
SAMN03647348 R S S S  
SAMN03647349 R S S S  
SAMN03647350 R S S S  
SAMN03647351 R S S S  
SAMN03647352 R S S S  
SAMN03647353 S S S S  
SAMN03647354 S S S S  
SAMN03647355 S S S S  
SAMN03647356 S S S S  
SAMN03647357 S S S S  
SAMN03647358 S S S S  
SAMN03647359 R S S S  
SAMN03647360 R S S S  
SAMN03647361 R S S S  
SAMN03647362 R S S S  
SAMN03647363 S S S S  
SAMN03647364 S S S S  
SAMN03647365 S S S S  
SAMN03647366 S S S S  
SAMN03647367 R S S S  
SAMN03647368 S S S S  
SAMN03647369 R S S S  
SAMN03647370 R S S S  
SAMN03647371 R S S S  
SAMN03647372 S S S S  
SAMN03647373 S S S S  
SAMN03647374 S S S S  
SAMN03647375 S S S S  
SAMN03647376 S S S S  
SAMN03647377 S S S S  
SAMN03647378 S S S S  
SAMN03647379 S R S S  
SAMN03647380 R S S S  
SAMN03647381 R S S S  
SAMN03647382 R S S S  
SAMN03647383 S S S S  
SAMN03647384 S S S S  
SAMN03647385 S S S S  
SAMN03647386 S S S S  
SAMN03647387 S S S S  
SAMN03647388 R S S S  
SAMN03647389 R S S S  
SAMN03647390 R R S S  
SAMN03647391 R S S S  
SAMN03647392 R S S S  
SAMN03647393 R S S S  
SAMN03647394 S S S S  
SAMN03647395 S S S S

Supplementary I

SAMN03647396 S S S S  
SAMN03647397 S S S S  
SAMN03647398 R S S S  
SAMN03647399 S R S S  
SAMN03647400 R R R S  
SAMN03647401 R S R S  
SAMN03647402 R S S S  
SAMN03647403 S S S S  
SAMN03647404 R R R S  
SAMN03647405 S S S S  
SAMN03647406 S S S S  
SAMN03647407 R R R S  
SAMN03647408 S S S S  
SAMN03647409 S S S S  
SAMN03647410 S S S S  
SAMN03647411 R R S R  
SAMN03647412 S R R  
SAMN03647413 R S S S  
SAMN03647414 U U U S  
SAMN03647415 S S S S  
SAMN03647416 S S S S  
SAMN03647417 S S S S  
SAMN03647418 R S S S  
SAMN03647419 R R S S  
SAMN03647420 S S S S  
SAMN03647421 R S S S  
SAMN03647422 R S S S  
SAMN03647423 R R S S  
SAMN03647424 R S S S  
SAMN03647425 S S S S  
SAMN03647426 S S S S  
SAMN03647427 S S S S  
SAMN03647428 S S S S  
SAMN03647429 S S S S  
SAMN03647430 R R R S  
SAMN03647431 R S S S  
SAMN03647432 R S S S  
SAMN03647433 R S S S  
SAMN03647434 R S S S  
SAMN03647435 S S S S  
SAMN03647436 S S S S  
SAMN03647437 S S S S  
SAMN03647438 S S S S  
SAMN03647439 S S S S  
SAMN03647440 R R R S  
SAMN03647441 S S S S  
SAMN03647442 S S S S  
SAMN03647443 R S S S  
SAMN03647444 R S S S  
SAMN03647445 R S S S  
SAMN03647446 S S S S  
SAMN03647447 S S S S  
SAMN03647448 S S S S



Supplementary I

SAMN03647449 S S S S  
SAMN03647450 S S S S  
SAMN03647451 R S S S  
SAMN03647452 S S S S  
SAMN03647453 S S S S  
SAMN03647454 S S S S  
SAMN03647455 R R S S  
SAMN03647456 R S S S  
SAMN03647457 S S S S  
SAMN03647458 S S S S  
SAMN03647459 S S S S  
SAMN03647460 S S S S  
SAMN03647461 R S S R  
SAMN03647462 R S S S  
SAMN03647463 R S S S  
SAMN03647464 S S S S  
SAMN03647465 S S S S  
SAMN03647466 S S S S  
SAMN03647467 R R S R  
SAMN03647468 R S S S  
SAMN03647469 S S S S  
SAMN03647470 S S S S  
SAMN03647471 S S S S  
SAMN03647472 S S S S  
SAMN03647473 R S S S  
SAMN03647474 R R S S  
SAMN03647475 S S S S  
SAMN03647476 S S S S  
SAMN03647477 S S S S  
SAMN03647478 S S S S  
SAMN03647479 R R R R  
SAMN03647480 S S S S  
SAMN03647481 S S S S  
SAMN03647482 S S S S  
SAMN03647483 S S S S  
SAMN03647484 S S S S  
SAMN03647485 R S S S  
SAMN03647486 S S S S  
SAMN03647487 S S S S  
SAMN03647488 S S S S  
SAMN03647489 S S S S  
SAMN03647490 S S S S  
SAMN03647491 S S S S  
SAMN03647492 S S S S  
SAMN03647493 R S S S  
SAMN03647494 R S S S  
SAMN03647495 S S S S  
SAMN03647496 R S S S  
SAMN03647497 R R S S  
SAMN03647498 R S S S  
SAMN03647499 S S S S  
SAMN03647500 S S S S  
SAMN03647501 S S S S

Supplementary I

SAMN03647502 S S S S  
SAMN03647503 S S S S  
SAMN03647504 R R S R  
SAMN03647505 R S S S  
SAMN03647506 S S S S  
SAMN03647507 S S S S  
SAMN03647508 R R R S  
SAMN03647509 S S S S  
SAMN03647510 S S S S  
SAMN03647511 S S S S  
SAMN03647512 S S S S  
SAMN03647513 R S S S  
SAMN03647514 R S S S  
SAMN03647515 R S S S  
SAMN03647516 R S S S  
SAMN03647517 R S S S  
SAMN03647518 S S S S  
SAMN03647519 S S S S  
SAMN03647520 S S S S  
SAMN03647521 S S S S  
SAMN03647522 R R S S  
SAMN03647523 R S S S  
SAMN03647524 R S S S  
SAMN03647525 R R R R  
SAMN03647526 R S S S  
SAMN03647527 S S S U  
SAMN03647528 S S S S  
SAMN03647529 S S S S  
SAMN03647530 S S S S  
SAMN03647531 S S S S  
SAMN03647532 R S S S  
SAMN03647533 S S S S  
SAMN03647534 S S S S  
SAMN03647535 S S S S  
SAMN03647536 S S S S  
SAMN03647537 S S S S  
SAMN03647538 S S S S  
SAMN03647539 S S S S  
SAMN03647540 R R S S  
SAMN03647541 R R S S  
SAMN03647542 R S S S  
SAMN03647543 R S S S  
SAMN03647544 S S S S  
SAMN03647545 S S S S  
SAMN03647546 S S S S  
SAMN03647547 R S S S  
SAMN03647548 S S S S  
SAMN03647549 R R S R  
SAMN03647550 R S S S  
SAMN03647551 S S S S  
SAMN03647552 S S S S  
SAMN03647553 S S S S  
SAMN03647554 S S S S

Supplementary I

SAMN03647555 S S S S  
SAMN03647556 R S S S  
SAMN03647557 S S S S  
SAMN03647558 R R R R  
SAMN03647559 R S S S  
SAMN03647560 R R R  
SAMN03647561 R R S S  
SAMN03647562 S R R R  
SAMN03647563 R R U S  
SAMN03647564 R S S S  
SAMN03647565 R R S R  
SAMN03647566 R S S S  
SAMN03647567 R S S S  
SAMN03647568 R S S S  
SAMN03647569 S S S  
SAMN03647570 R S S S  
SAMN03647571 S R S S  
SAMN03647572 R S S S  
SAMN03647573 R R R R  
ERS389344 S S S R  
ERS389345 S S S S  
SAMN03647574 S S S S  
ERS389347 S S S S  
ERS389348 S S S S  
ERS389349 S S S S  
SAMN03647575 R R S S  
SAMN03647576 S S S S  
ERS389350 S S S S  
SAMN03647577 S S S S  
ERS389351 S S S S  
ERS389352 S S S S  
ERS389353 S S S S  
ERS389354 R S S S  
ERS389355 S S S S  
ERS389356 S S S S  
ERS389357 R S S S  
ERS389358 S S S S  
ERS389359 S S S S  
ERS389360 S S S S  
ERS389361 S S S S  
ERS389362 S S S S  
ERS389363 S S S S  
ERS389364 S S S S  
ERS389365 S S S S  
ERS389366 S S S S  
ERS389367 S S S S  
SAMN03647578 S S S S  
ERS389369 S S S S  
SAMN03647579 S S S S  
ERS389371 S S S S  
ERS389372 S S S S  
SAMN03647580 S S S S  
ERS389373 S S S S

Supplementary I

ERS389374 S S S S  
ERS389375 S S S S  
ERS389376 S S S S  
SAMN03647581 S S S S  
ERS389377 S S S S  
SAMN03647582 S S S S  
ERS389379 S S S S  
ERS389380 R S S S  
ERS389381 S S S S  
ERS389382 S S S S  
ERS389383 S S S S  
SAMN03647583 S S S S  
ERS389384 S S S S  
ERS389385 S S S S  
SAMN03647584 S S S S  
ERS389387 S S S S  
ERS389388 S S S S  
ERS389389 S S R S  
ERS389390 S S S S  
ERS389391 S S S S  
ERS389392 S S S S  
ERS389393 S S S S  
SAMN03647585 S S S S  
ERS389394 S S S S  
SAMN03647586 S S S S  
ERS389395 S S S S  
SAMN03647587 S S S S  
ERS389397 S S S S  
ERS389398 S S S S  
ERS389399 S S S S  
ERS389400 S S S S  
ERS389401 S S S S  
ERS389402 S S S S  
SAMN03647588 S S S S  
SAMN03647589 S S S S  
ERS389403 S S S S  
SAMN03647590 R S S S  
ERS389404 S S S S  
ERS389405 S S S S  
ERS389406 S S S R  
ERS389407 S S S S  
SAMN03647591 S S S S  
ERS389408 S S S S  
SAMN03647592 R R R R  
SAMN03647593 S S S S  
SAMN03647594 S S S S  
SAMN03647595 S S S S  
SAMN03647596 S S S S  
ERS389409 S S S S  
ERS389410 S S S S  
ERS389411 S S S S  
ERS389412 S S S S  
SAMN03647597 S S S S

Supplementary I

SAMN03647598 S S S S  
ERS389413 S S S S  
SAMN03647599 S S S S  
ERS389415 S S S S  
ERS389416 S S S S  
ERS389417 S S S S  
ERS389418 S S S R  
ERS389419 S S S S  
ERS389420 S S S S  
SAMN03647600 S S S S  
ERS389421 S S S S  
SAMN03647601 S S S S  
ERS389422 S S S S  
ERS389423 S S S S  
ERS389424 S S S S  
ERS389425 S S S S  
SAMN03647602 R R R S  
SAMN03647603 S S S S  
ERS389426 S S S S  
SAMN03647604 S S S S  
ERS389427 S R S S  
ERS389428 S S S S  
SAMN03647605 R R S R  
ERS389429 S S S S  
ERS389430 S S S S  
ERS389431 S S S S  
ERS389432 S S S S  
ERS389433 S S S S  
ERS389434 S S S S  
SAMN03647606 S S S S  
ERS389435 S S S S  
ERS389436 S S S S  
SAMN03647607 S S S S  
ERS389437 S S S S  
ERS389438 S S S S  
SAMN03647608 S S S S  
SAMN03647609 S S S S  
ERS389439 S S S S  
SAMN03647610 S S S S  
SAMN03647611 S S S S  
SAMN03647612 S S S S  
ERS389441 S S S S  
SAMN03647613 S S S S  
SAMN03647614 S S S S  
SAMN03647615 S S S S  
ERS389445 S S S S  
ERS389447 S S S S  
ERS389448 S S S S  
SAMN03647616 S S S S  
SAMN03647617 S S S S  
ERS389449 S S S S  
SAMN03647618 S S S S  
SAMN03647619 R S S S

Supplementary I

ERS389450 S S S S  
SAMN03647620 S S S S  
ERS389451 S S S S  
ERS389452 S S S S  
SAMN03647621 S S S S  
SAMN03647622 S S S S  
ERS389455 S S S S  
ERS389456 S S S S  
SAMN03647623 S S S S  
ERS389458 S S S S  
ERS389462 R S S R  
ERS389463 S S S S  
SAMN03647624 S S S S  
ERS389464 S S S S  
ERS389465 S S S S  
ERS389467 S S S S  
ERS389468 S S S S  
SAMN03647625 S S S S  
SAMN03647626 R S S S  
ERS389469 S S S S  
ERS389470 S S S S  
SAMN03647627 S S S S  
ERS389471 S S S S  
SAMN03647628 S S S S  
ERS389472 S S S S  
ERS389473 S S S S  
ERS389474 S S S S  
SAMN03647629 S S S S  
ERS389475 R R S  
ERS389476 S S S S  
ERS389477 S S S S  
ERS389478 S S S S  
ERS389479 S S S S  
ERS389480 S S S S  
ERS389481 S S S S  
ERS389482 S S S R  
ERS389483 S S S S  
SAMN03647630 S S S S  
ERS389484 S S S S  
ERS389485 S S S S  
ERS389486 S S S S  
ERS389487 S S S S  
SAMN03647631 S S S S  
ERS389488 S S S S  
ERS389489 S S S S  
ERS389490 S S S S  
SAMN03647632 R R R S  
ERS389491 S S S S  
ERS389492 S S S S  
ERS389493 S S S S  
SAMN03647633 S S S S  
SAMN03647634 S S S S  
ERS389494 S S S S

Supplementary I

ERS389495 S S S S  
SAMN03647635 S S S S  
SAMN03647636 S S S S  
SAMN03647637 S S S S  
ERS389498 S S S S  
ERS389499 S S S S  
ERS389500 S S S S  
ERS389501 R S S S  
SAMN03647638 S U U U  
ERS389503 S S S S  
ERS389504 S S S S  
ERS389505 S S S S  
ERS389507 S S S S  
ERS389508 S S S S  
ERS389509 S S S S  
ERS389510 S S S S  
ERS389511 R R R R  
ERS389512 S S S S  
ERS389513 S S S S  
SAMN03647639 S S S S  
ERS389514 S S S S  
ERS389515 S S S S  
ERS389516 S S S S  
SAMN03647640 S S S S  
SAMN03647641 S S S S  
SAMN03647642 S S S S  
SAMN03647643 S S S S  
SAMN03647644 S S S S  
SAMN03647645 S S S S  
SAMN03647646 S S S S  
SAMN03647647 S S S S  
SAMN03647648 S S S S  
SAMN03647649 S S S S  
SAMN03647650 S S S S  
SAMN03647651 S S S S  
SAMN03647652 S S S S  
SAMN03647653 S S S S  
SAMN03647654 S S S S  
SAMN03647655 S S S S  
SAMN03647656 S S S S  
SAMN03647657 S S S S  
SAMN03647658 S S S S  
SAMN03647659 S S S S  
SAMN03647660 S S S S  
SAMN03647661 S S S S  
SAMN03647662 S S S S  
SAMN03647663 S S S S  
SAMN03647664 S S S S  
SAMN03647665 S S S S  
SAMN03647666 S S S S  
SAMN03647667 S S S S  
SAMN03647668 S S S S  
SAMN03647669 S S S S

Supplementary I

SAMN03647670 U U U S  
SAMN03647671 S S S S  
SAMN03647672 R S S S  
SAMN03647673 S S S S  
SAMN03647674 S S S S  
SAMN03647675 S S S S  
SAMN03647676 S S S S  
SAMN03647677 S S S S  
SAMN03647678 S S S S  
SAMN03647679 S S S S  
SAMN03647680 S S S S  
SAMN03647681 S S S S  
SAMN03647682 S S S S  
SAMN03647683 S S S S  
SAMN03647684 S S S S  
SAMN03647685 S S S S  
SAMN03647686 S S S S  
SAMN03647687 S S S S  
SAMN03647688 S S S S  
SAMN03647689 S S S S  
SAMN03647690 S S S S  
SAMN03647691 S S S S  
SAMN03647692 S S S S  
SAMN03647693 S S S S  
SAMN03647694 S S S S  
SAMN03647695 S S S S  
SAMN03647696 S S S S  
SAMN03647697 S S S S  
SAMN03647698 S S S S  
SAMN03647699 S S S S  
SAMN03647700 S S S S  
SAMN03647701 S S S S  
SAMN03647702 S S S S  
SAMN03647703 S S S S  
SAMN03647704 S S S S  
SAMN03647705 S S S S  
SAMN03647706 S S S S  
SAMN03647707 S S S S  
SAMN03647708 S S S S  
SAMN03647709 S S S S  
SAMN03647710 S S S S  
SAMN03647711 S S S S  
SAMN03647712 S S S S  
SAMN03647713 S S S S  
SAMN03647714 S S S S  
SAMN03647715 S S S S  
SAMN03647716 S S S S  
SAMN03647717 S S S S  
SAMN03647718 S S S S  
SAMN03647719 S S S S  
SAMN03647720 S S S S  
SAMN03647721 S S S S  
SAMN03647722 U U U S



Supplementary I

SAMN03647723 S S S S  
SAMN03647724 S S S S  
SAMN03647725 S S S S  
SAMN03647726 S S S S  
SAMN03647727 S S S S  
SAMN03647728 S S S S  
SAMN03647729 S S S S  
SAMN03647730 S S S S  
SAMN03647731 S S S S  
SAMN03647732 S S S S  
SAMN03647733 S S S S  
SAMN03647734 S S S S  
SAMN03647735 S S S S  
SAMN03647736 S S S S  
SAMN03647737 S S S S  
SAMN03647738 S S S S  
SAMN03647739 S S S S  
SAMN03647740 S S S S  
SAMN03647741 S S S S  
SAMN03647742 S S S S  
SAMN03647743 S S S S  
SAMN03647744 S S S S  
SAMN03647745 S S S S  
SAMN03647746 S S S S  
SAMN03647747 S S S S  
SAMN03647748 S S S S  
SAMN03647749 S S S S  
SAMN03647750 S S S S  
SAMN03647751 S S S S  
SAMN03647752 S S S S  
SAMN03647753 S S S S  
SAMN03647754 S S S S  
SAMN03647755 S S S S  
SAMN03647756 S S S S  
SAMN03647757 S S S S  
SAMN03647758 S S S S  
SAMN03647759 S S S S  
SAMN03647760 S S S S  
SAMN03647761 S S S S  
SAMN03647762 S S S S  
SAMN03647763 S S S S  
SAMN03647764 S S S S  
SAMN03647765 S S S S  
SAMN03647766 S S S S  
SAMN03647767 S S S S  
SAMN03647768 S S S S  
SAMN03647769 S S S S  
SAMN03647770 S S S S  
SAMN03647771 S S S S  
SAMN03647772 S S S S  
SAMN03647773 S S S S  
SAMN03647774 S R S S  
SAMN03647775 S S S S

Supplementary I

SAMN03647776 S S S S  
SAMN03647777 S S S S  
SAMN03647778 S S S S  
SAMN03647779 S S S S  
SAMN03647780 S S S S  
SAMN03647781 S S S S  
SAMN03647782 S S S S  
SAMN03647783 S S S S  
SAMN03647784 S S S S  
SAMN03647785 S S S S  
SAMN03647786 S S S S  
SAMN03647787 S S S S  
SAMN03647788 S S S S  
SAMN03647789 S S S S  
SAMN03647790 S S S S  
SAMN03647791 S S S S  
SAMN03647792 S S S S  
SAMN03647793 S S S S  
SAMN03647794 S S S S  
SAMN03647795 S S S S  
SAMN03647796 S S S S  
SAMN03647797 S S S S  
SAMN03647798 S S S S  
SAMN03647799 S S S S  
SAMN03647800 S S S S  
SAMN03647801 S S S S  
SAMN03647802 S S S S  
SAMN03647803 S S S S  
SAMN03647804 S S S S  
SAMN03647805 S S S S  
SAMN03647806 S S S S  
SAMN03647807 S S S S  
SAMN03647808 S S S S  
SAMN03647809 S S S S  
SAMN03647810 S S S S  
SAMN03647811 S S S S  
SAMN03647812 S S S S  
SAMN03647813 S S S S  
SAMN03647814 S S S S  
SAMN03647815 S S S S  
SAMN03647816 S S S S  
SAMN03647817 S S S S  
SAMN03647818 S S S S  
SAMN03647819 S S S S  
SAMN03647820 S S S S  
SAMN03647821 S S S S  
SAMN03647822 S S S S  
SAMN03647823 S S S S  
SAMN03647824 S S S S  
SAMN03647825 S S S S  
SAMN03647826 S S S S  
SAMN03647827 S S S S  
SAMN03647828 S S S S

Supplementary I

SAMN03647829 S S S S  
SAMN03647830 S S S S  
SAMN03647831 S S S S  
SAMN03647832 S S S S  
SAMN03647833 S S S S  
SAMN03647834 S S S S  
SAMN03647835 S S S S  
SAMN03647836 S S S S  
SAMN03647837 S S S S  
SAMN03647838 S S S S  
SAMN03647839 S S S S  
SAMN03647840 S S S S  
SAMN03647841 S S S S  
SAMN03647842 S S S S  
SAMN03647843 S S S S  
SAMN03647844 S S S S  
SAMN03647845 S S S S  
SAMN03647846 S S S S  
SAMN03647847 S S S S  
SAMN03647848 S S S S  
SAMN03647849 S S S S  
SAMN03647850 S S S S  
SAMN03647851 S S S S  
SAMN03647852 S S S S  
SAMN03647853 S S S S  
SAMN03647854 S S S S  
SAMN03647855 S S S S  
SAMN03647856 S S S S  
SAMN03647857 S S S S  
SAMN03647858 S S S S  
SAMN03647859 S S S S  
SAMN03647860 S S S S  
SAMN03647861 S S S S  
SAMN03647862 U S S S  
SAMN03647863 S S S S  
SAMN03647864 S S S S  
SAMN03647865 S S S S  
SAMN03647866 S S S S  
SAMN03647867 S S S S  
SAMN03647868 S S S S  
SAMN03647869 S S S S  
SAMN03647870 S S S S  
SAMN03647871 S S S S  
SAMN03647872 S S S S  
SAMN03647873 S S S S  
SAMN03647874 S S S S  
SAMN03647875 S S S S  
SAMN03647876 S S S S  
SAMN03647877 S S S S  
SAMN03647878 R S S S  
SAMN03647879 S S S S  
SAMN03647880 S S S S  
SAMN03647881 S S S S

Supplementary I

SAMN03647882 S S S S  
SAMN03647883 S S S S  
SAMN03647884 S S S S  
SAMN03647885 S S S S  
SAMN03647886 S S S S  
SAMN03647887 S S S S  
SAMN03647888 S S S S  
SAMN03647889 S S S S  
SAMN03647890 S S S S  
SAMN03647891 S S S S  
SAMN03647892 S S S S  
SAMN03647893 S S S S  
SAMN03647894 U U U R  
SAMN03647895 S S S S  
SAMN03647896 S S S S  
SAMN03647897 S S S S  
SAMN03647898 S S S S  
SAMN03647899 S S S S  
SAMN03647900 S S S S  
SAMN03647901 S S S S  
SAMN03647902 S S S S  
SAMN03647903 S S S S  
SAMN03647904 S S S S  
SAMN03647905 S S S S  
SAMN03647906 S S S S  
SAMN03647907 S S S S  
SAMN03647908 S S S S  
SAMN03647909 S S S S  
SAMN03647910 S S S S  
SAMN03647911 S S S S  
SAMN03647912 R S S S  
SAMN03647913 R R R S  
SAMN03647914 S S S S  
SAMN03647915 S S S S  
SAMN03647916 S S S S  
SAMN03647917 S S S S  
SAMN03647918 S S S S  
SAMN03647919 S S S S  
SAMN03647920 S S S S  
SAMN03647921 S S S S  
SAMN03647922 S S S S  
SAMN03647923 S S S S  
SAMN03647924 S S S S  
SAMN03647925 S S S S  
SAMN03647926 S S S S  
SAMN03647927 S S S S  
SAMN03647928 S S S S  
SAMN03647929 S S S S  
SAMN03647930 U U S S  
SAMN03647931 S S S S  
SAMN03647932 S S S S  
SAMN03647933 S S S S  
SAMN03647934 S S S S

Supplementary I

SAMN03647935 S S S S  
SAMN03647936 S S S S  
SAMN03647937 S S S S  
SAMN03647938 S S S S  
SAMN03647939 S S S S  
SAMN03647940 S S S S  
SAMN03647941 S S S S  
SAMN03647942 S S S S  
SAMN03647943 S S S S  
SAMN03647944 S S S S  
SAMN03647945 S S S S  
SAMN03647946 S S S S  
SAMN03647947 S S S S  
SAMN03647948 S S S S  
SAMN03647949 S S S S  
SAMN03647950 S S S S  
SAMN03647951 S S S S  
SAMN03647952 S S S S  
SAMN03647953 S S S S  
SAMN03647954 S S S S  
SAMN03647955 S S S S  
SAMN03647956 S S S S  
SAMN03647957 S S S S  
SAMN03647958 S S S S  
SAMN03647959 S S S S  
SAMN03647960 S S S S  
SAMN03647961 S S S S  
SAMN03647962 S S S S  
SAMN03647963 S S S S  
SAMN03647964 S S S S  
SAMN03647965 S S S S  
SAMN03647966 S S S S  
SAMN03647967 S S S S  
SAMN03647968 S S S S  
SAMN03647969 S S S S  
SAMN03647970 S S S S  
SAMN03647971 S S S S  
SAMN03647972 S S S S  
SAMN03647973 S S S S  
SAMN03647974 S S S S  
SAMN03647975 S S S S  
SAMN03647976 R R S S  
SAMN03647977 S S S S  
SAMN03647978 S S S S  
SAMN03647979 S S S S  
SAMN03647980 S S S S  
SAMN03647981 S S S S  
SAMN03647982 S S S S  
SAMN03647983 S S S S  
SAMN03647984 S S S S  
SAMN03647985 S S S S  
SAMN03647986 S S S S  
SAMN03647987 S S S S

Supplementary I

SAMN03647988 S S S S  
SAMN03647989 S S S S  
SAMN03647990 S S S S  
SAMN03647991 S S S S  
SAMN03647992 S S S S  
SAMN03647993 S S S R  
SAMN03647994 S S S R  
SAMN03647995 R S S S  
SAMN03647996 R S S S  
SAMN03647997 S S S S  
SAMN03647998 S S S R  
SAMN03647999 S S R S  
SAMN03648000 R S S S  
SAMN03648001 R R S S  
SAMN03648002 R S S S  
SAMN03648003 R R R R  
SAMN03648004 R S S S  
SAMN03648005 R S S S  
SAMN03648006 R S S S  
SAMN03648007 S S S S  
SAMN03648008 S S S S  
SAMN03648009 R R S S  
SAMN03648010 R S S S  
SAMN03648011 R R S S  
SAMN03648012 S R S S  
SAMN03648013 R S S S  
SAMN03648014 R S S S  
SAMN03648015 R R S S  
SAMN03648016 R S S S  
SAMN03648017 S S S R  
SAMN03648018 R S S S  
SAMN03648019 R S S S  
SAMN03648020 S S S R  
SAMN03648021 R R S S  
SAMN03648022 R S S S  
SAMN03648023 R S S S  
SAMN03648024 R S S S  
SAMN03648025 R S S S  
SAMN03648026 R S S S  
SAMN03648027 R R S S  
SAMN03648028 R R S S  
SAMN03648029 S S S S  
SAMN03648030 S S S S  
SAMN03648031 S S S S  
SAMN03648032 R S S S  
SAMN03648033 S S S S  
SAMN03648034 S S S S  
SAMN03648035 S S S S  
SAMN03648036 S S S S  
SAMN03648037 S S S S  
SAMN03648038 S S S S  
SAMN03648039 R S S S  
SAMN03648040 S S S S

Supplementary I

SAMN03648041 R S S S  
SAMN03648042 R R R S  
SAMN03648043 R R R S  
SAMN03648044 R S S S  
SAMN03648045 R S S S  
SAMN03648046 R R R S  
SAMN03648047 R S S S  
SAMN03648048 R S S S  
SAMN03648049 R S S S  
SAMN03648050 R S U S  
SAMN03648051 R S S S  
SAMN03648052 R S S S  
SAMN03648053 R R S S  
SAMN03648054 R S S S  
SAMN03648055 R S S S  
SAMN03648056 R S S S  
SAMN03648057 R R U R  
SAMN03648058 R S S S  
SAMN03648059 R S S S  
SAMN03648060 R S S S  
SAMN03648061 R S S S  
SAMN03648062 R R R S  
SAMN03648063 R R S R  
SAMN03648064 R R S U  
SAMN03648065 R S S S  
SAMN03648066 S S S S  
SAMN03648067 R S S S  
SAMN03648068 S R S S  
SAMN03648069 S S S R  
SAMN03648070 R S S S  
SAMN03648071 R S S S  
SAMN03648072 S S S S  
SAMN03648073 R S S S  
SAMN03648074 S S S  
SAMN03648075 R S S S  
SAMN03648076 R S S S  
SAMN03648077 R R S S  
SAMN03648078 R S S S  
SAMN03648079 R R S S  
SAMN03648080 R S S U  
SAMN03648081 R S S S  
SAMN03648082 R R R R  
SAMN03648083 S S S  
SAMN03648084 R R R S  
SAMN03648085 R R S S  
SAMN03648086 S S S S  
SAMN03648087 R R S S  
SAMN03648088 R S S S  
SAMN03648089 R S S S  
SAMN03648090 R S S S  
SAMN03648091 R S S S  
SAMN03648092 R S S S  
SAMN03648093 R R R S

Supplementary I

SAMN03648094 R R S R  
SAMN03648095 S S S S  
SAMN03648170 S R S R  
SAMN03648171 S S S S  
SAMN03648172 R R S S  
SAMN03648173 S S S S  
SAMN03648174 S S S S  
SAMN03648175 S S S S  
SAMN03648176 S S S S  
SAMN03648177 S S S S  
SAMN03648178 S S S S  
SAMN03648179 S S S S  
SAMN03648180 S S S S  
SAMN03648181 S S S S  
SAMN03648182 S S S S  
SAMN03648183 S S S S  
SAMN03648184 S S S S  
SAMN03648185 S S S S  
SAMN03648186 S S S S  
SAMN03648187 S S S S  
SAMN03648188 S S S S  
SAMN03648189 S S S S  
SAMN03648190 S S S S  
SAMN03648191 S S S S  
SAMN03648192 S S S S  
SAMN03648193 S S S S  
SAMN03648194 S S S S  
SAMN03648195 S S S S  
SAMN03648196 S S S S  
SAMN03648197 R R R R  
SAMN03648198 S S S S  
SAMN03648199 S S S S  
SAMN03648200 S S S S  
SAMN03648201 S S S S  
SAMN03648202 S S S S  
SAMN03648203 S S S S  
SAMN03648204 S S S S  
SAMN03648205 S S S S  
SAMN03648206 S S S S  
SAMN03648207 S S S S  
SAMN03648208 S S S S  
SAMN03648209 S S S S  
SAMN03648210 S S S S  
SAMN03648211 S S S S  
SAMN03648212 S S S S  
SAMN03648213 S S S S  
SAMN03648214 S S S S  
SAMN03648215 S S S S  
SAMN03648216 S S S S  
SAMN03648217 S S S S  
SAMN03648218 S S S S  
SAMN03648219 S S S S  
SAMN03648220 S S S S



Supplementary I

SAMN03648221 S S S S  
SAMN03648222 S S S S  
SAMN03648223 S S S S  
SAMN03648224 S S S S  
SAMN03648225 S S S S  
SAMN03648226 S S S S  
SAMN03648227 S S S S  
SAMN03648228 S S S S  
SAMN03648229 S S S S  
SAMN03648230 S S S S  
SAMN03648231 S S S S  
SAMN03648232 S S S S  
SAMN03648233 S S S S  
SAMN03648234 S S S S  
SAMN03648235 S S S S  
SAMN03648236 S S S S  
SAMN03648237 S S S S  
SAMN03648238 S S S S  
SAMN03648239 S S S S  
SAMN03648240 S S S S  
SAMN03648241 S S S S  
SAMN03648242 S S S S  
SAMN03648243 S S S S  
SAMN03648244 S S S S  
SAMN03648245 S S S U  
SAMN03648246 S S S S  
SAMN03648247 S S S S  
SAMN03648248 S S S S  
SAMN03648249 S S S S  
SAMN03648250 S S S S  
SAMN03648251 S S S S  
SAMN03648252 S S S S  
SAMN03648253 S S S S  
SAMN03648254 S S S S  
SAMN03648255 S S S S  
SAMN03648256 S S S S  
SAMN03648257 S S S S  
SAMN03648258 S S S S  
SAMN03648259 S S S S  
SAMN03648260 S S S S  
SAMN03648261 S S S S  
SAMN03648262 S S S S  
SAMN03648263 S S S S  
SAMN03648264 S S S S  
SAMN03648265 S S S S  
SAMN03648266 S S S S  
SAMN03648267 S S S S  
SAMN03648268 R R S S  
SAMN03648269 S S S S  
SAMN03648270 R R S R  
SAMN03648271 R S S S  
SAMN03648272 S S S S  
SAMN03648273 S S S S

Supplementary I

SAMN03648274 S S S S  
SAMN03648275 S S S S  
SAMN03648276 U U U S  
SAMN03648277 S S S S  
SAMN03648278 S S S S  
SAMN03648279 S S S S  
SAMN03648280 S S S S  
SAMN03648281 S S S S  
SAMN03648282 S S S S  
SAMN03648283 S S S S  
SAMN03648284 S S R S  
SAMN03648285 S S S S  
SAMN03648286 S S R  
SAMN03648287 S S S S  
SAMN03648288 S S S S  
SAMN03648289 S S S S  
SAMN03648290 S S S S  
SAMN03648291 S S S S  
SAMN03648292 S S S S  
SAMN03648293 S S S S  
SAMN03648294 S S S S  
SAMN03648295 S S S S  
SAMN03648296 S S S S  
SAMN03648297 S S S S  
SAMN03648298 S S S S  
SAMN03648299 S S S S  
SAMN03648300 R R U R  
SAMN03648301 S S S S  
SAMN03648302 R R R R  
SAMN03648303 S S S S  
SAMN03648304 S S S S  
SAMN03648305 S S S S  
SAMN03648306 S S S S  
SAMN03648307 S S S S  
SAMN03648308 S S S S  
SAMN03648309 S S S S  
ERS389518 S S S S  
ERS389519 S S S S  
ERS389520 S S S S  
SAMN03648310 R U S S  
ERS389522 S S S S  
ERS389523 S S S S  
ERS389524 S S S S  
ERS389525 S S S S  
ERS389527 S S S S  
ERS389528 S S S S  
ERS389529 S S S S  
ERS389530 S S S S  
SAMN03648311 S S S S  
SAMN03648312 R S S S  
ERS389535 S S S S  
ERS389536 S S S S  
ERS389538 S S S S

Supplementary I

SAMN03648313 S U U U  
ERS389539 S S S S  
ERS389540 S U U U  
ERS389541 S S S S  
ERS389542 R S S S  
ERS389543 S S S S  
ERS389544 S S S S  
SAMN03648314 S S S S  
ERS389545 S S S S  
ERS389548 S S S S  
ERS389549 S S S S  
ERS389550 S S S S  
ERS389551 S U U U  
ERS389552 S S S S  
ERS389553 R U U U  
ERS389554 S S S S  
SAMN03648315 S S S S  
SAMN03648316 S S S S  
SAMN03648317 S S S S  
SAMN03648318 S S S S  
SAMN03648319 S S S S  
SAMN03648320 S S S S  
SAMN03648321 S S S S  
SAMN03648322 S S S S  
SAMN03648323 S S S S  
SAMN03648324 R S S S  
SAMN03648325 S S S S  
SAMN03648326 S S S S  
SAMN03648327 S S S S  
SAMN03648328 S S S S  
SAMN03648329 S S S S  
SAMN03648330 S S S S  
SAMN03648331 S S S S  
ERS389558 S S S S  
ERS389559 S S S S  
ERS389562 S S S S  
ERS389563 S S S S  
ERS389564 R S S S  
ERS389565 S S S S  
ERS389568 S S S S  
ERS389569 S S S S  
SAMN03648332 S S S S  
ERS389575 S S S S  
ERS389579 S S S S  
ERS389580 S S S S  
ERS389581 S S S S  
SAMN03648333 S S S S  
SAMN03648334 S S S U  
SAMN03648335 S S S S  
SAMN03648336 S S S S  
SAMN03648337 S S S S  
SAMN03648338 S S S S  
SAMN03648339 S S S S

Supplementary I

SAMN03648340 S S S S  
SAMN03648341 S S S S  
SAMN03648342 S S S S  
SAMN03648343 S S S S  
SAMN03648344 S S S S  
SAMN03648345 S S S S  
SAMN03648346 S S S S  
SAMN03648347 S S S S  
SAMN03648348 S S S S  
SAMN03648349 S S S S  
SAMN03648350 S S S S  
SAMN03648351 S S S S  
SAMN03648352 S S S S  
SAMN03648353 S S S S  
SAMN03648354 S S S S  
SAMN03648355 S S S S  
SAMN03648356 S S S S  
SAMN03648357 S S S S  
SAMN03648358 S S S S  
SAMN03648359 S S S S  
SAMN03648360 S S S S  
SAMN03648361 S S S S  
SAMN03648362 S S S S  
SAMN03648363 S S S S  
SAMN03648364 S S S S  
SAMN03648365 S S S S  
SAMN03648366 S S S S  
SAMN03648367 S S S S  
SAMN03648368 S S S S  
SAMN03648369 S S S S  
SAMN03648370 S S S S  
SAMN03648371 S S S S  
SAMN03648372 S S S S  
SAMN03648373 S S S S  
SAMN03648374 S S S S  
SAMN03648375 S S S S  
SAMN03648376 S S S S  
SAMN03648377 S S S S  
SAMN03648378 S S S S  
SAMN03648379 S S S S  
SAMN03648380 S S S S  
SAMN03648381 S S S S  
SAMN03648382 S S S S  
SAMN03648383 S S S S  
SAMN03648384 S S S S  
SAMN03648385 S S S S  
SAMN03648386 S S S S  
SAMN03648387 S S S S  
SAMN03648388 S S S S  
SAMN03648389 S S S S  
SAMN03648390 S S S S  
SAMN03648391 S S S S  
SAMN03648392 S S S S

Supplementary I

SAMN03648393 S S S S  
SAMN03648394 S S S S  
SAMN03648395 S S S S  
SAMN03648396 S S S S  
SAMN03648397 S S S S  
SAMN03648398 S S S S  
SAMN03648399 S S S S  
SAMN03648400 S S S S  
SAMN03648401 S S S S  
SAMN03648402 S S S S  
SAMN03648403 S S S S  
SAMN03648404 S S S S  
SAMN03648405 S S S S  
SAMN03648406 S S S S  
SAMN03648407 S S S S  
SAMN03648408 S S S S  
SAMN03648409 S S S S  
SAMN03648410 S S S S  
SAMN03648411 S S S S  
SAMN03648412 S S S S  
SAMN03648413 S S S S  
SAMN03648414 S S S S  
SAMN03648415 S S S S  
SAMN03648416 S S S S  
SAMN03648417 S S S S  
SAMN03648418 S S S S  
SAMN03648419 S S S S  
SAMN03648420 S S S S  
SAMN03648421 S S S S  
SAMN03648422 S S S S  
SAMN03648423 S S S S  
SAMN03648424 S S S S  
SAMN03648425 S S S S  
SAMN03648426 S S S S  
SAMN03648427 S S S S  
SAMN03648428 S S S S  
SAMN03648429 S S S S  
SAMN03648430 S S S S  
SAMN03648431 S S S S  
SAMN03648432 S S S S  
SAMN03648433 S S S S  
SAMN03648434 S S S S  
SAMN03648435 S S S S  
SAMN03648436 S S S S  
SAMN03648437 S S S S  
SAMN03648438 S S S S  
SAMN03648439 S S S S  
SAMN03648440 S S S S  
SAMN03648441 S S S S  
SAMN03648442 S S S S  
SAMN03648443 S S S S  
SAMN03648444 S S S S  
SAMN03648445 S S S S

Supplementary I

SAMN03648446 S S S S  
SAMN03648447 S S S S  
SAMN03648448 S S S S  
SAMN03648449 S S S S  
SAMN03648450 S S S S  
SAMN03648451 S S S S  
SAMN03648452 S S S S  
SAMN03648453 S S S S  
SAMN03648454 S S S S  
SAMN03648455 S S S S  
SAMN03648456 S S S S  
SAMN03648457 S S S S  
SAMN03648458 S S S S  
SAMN03648459 S S S S  
SAMN03648460 S S S S  
SAMN03648461 S S S S  
SAMN03648462 S S S S  
SAMN03648463 S S S S  
SAMN03648464 S S S S  
SAMN03648465 S S S S  
SAMN03648466 S S S S  
SAMN03648467 S S S S  
SAMN03648468 S S S S  
SAMN03648469 S S S S  
SAMN03648470 S S S S  
SAMN03648471 S S S S  
SAMN03648472 S S S S  
SAMN03648473 S S S S  
SAMN03648474 S S S S  
SAMN03648475 S S S S  
SAMN03648476 S S S S  
SAMN03648477 S S S S  
SAMN03648478 S S S S  
SAMN03648479 S S S S  
SAMN03648480 S S S S  
SAMN03648481 S S S S  
SAMN03648482 S S S U  
SAMN03648483 S S S S  
SAMN03648484 S S S S  
SAMN03648485 S S S S  
SAMN03648486 S S S S  
SAMN03648487 R S S S  
SAMN03648488 S S S S  
SAMN03648489 S S S S  
SAMN03648490 S S S S  
SAMN03648491 S S S S  
SAMN03648492 S S S S  
SAMN03648493 S S S S  
SAMN03648494 S S S S  
SAMN03648495 S S S S  
SAMN03648496 S S S S  
SAMN03648497 S S S S  
SAMN03648498 S S S S

Supplementary I

SAMN03648499 S S S S  
SAMN03648500 S S S S  
SAMN03648501 S S S S  
SAMN03648502 S S S S  
SAMN03648503 S S S S  
SAMN03648504 S S S S  
SAMN03648505 R S S S  
SAMN03648506 R S S S  
SAMN03648507 S S S S  
SAMN03648508 S R R R  
SAMN03648509 S S S R  
SAMN03648510 R S S S  
SAMN03648511 S S S S  
SAMN03648512 S S S S  
SAMN03648513 S S S S  
SAMN03648514 S S S S  
SAMN03648515 S S S S  
SAMN03648516 S S S S  
SAMN03648517 S S S S  
SAMN03648518 S S S U  
SAMN03648519 S S S S  
SAMN03648520 S S S S  
SAMN03648521 S S S S  
SAMN03648522 S S S S  
SAMN03648523 S S S S  
SAMN03648524 S S S S  
ERS389586 S S S S  
SAMN03648525 S S S S  
ERS389587 S S S S  
ERS389588 S S S S  
ERS389589 S S S S  
ERS389590 S U U U  
ERS389591 S S S S  
ERS389592 S S S S  
ERR2515372 S S S S  
ERR2515493 S S S S  
ERR2515455 S S S R  
ERR2515111 S S S S  
ERR2515819 S S S S  
ERR2516028 S S S S  
ERR2515626 S S S S  
ERR2515790 S S S S  
ERR2515437 S S S S  
ERR2515268 S S S S  
ERR2515402 S S S S  
ERR2515980 S S S S  
ERR2515138 S S S S  
ERR2515547 S S S S  
ERR2515770 S S S S  
ERR2515293 R R R R  
ERR2515740 R R R R  
ERR2516085 S S S S  
ERR2515172 S S S S

Supplementary I

ERR2515467 S S S S  
ERR2516059 S S S U  
ERR2515243 S S S S  
ERR2516037 R S S S  
ERR2515469 S S S S  
ERR2515290 S S S S  
ERR2515562 S S S S  
ERR2515901 S S S S  
ERR2515702 S S S S  
ERR2515192 S S S S  
ERR2515693 S S S S  
ERR2515114 R S S S  
ERR2515118 S S S S  
ERR2515190 S S S S  
ERR2515954 S S S S  
ERR2515809 S S S S  
ERR2515727 S R S S  
ERR2515349 S S S S  
ERR2515377 S S S S  
ERR2515353 R R R S  
ERR2515811 S S S S  
ERR2515124 S S S S  
ERR2515818 S S S S  
ERR2515652 S S S S  
ERR2515433 S S S S  
ERR2515751 R S S R  
ERR2515673 S S S S  
ERR2515116 S S S S  
ERR2515622 R R R R  
ERR2515302 S S S S  
ERR2515375 R S S S  
ERR2515845 R S S S  
ERR2515537 S S S S  
ERR2516048 S S S S  
ERR2515580 S S S S  
ERR2515656 S S S S  
ERR2515291 S S S S  
ERR2515368 S S S S  
ERR2515446 S S S S  
ERR2515129 S S S S  
ERR2515191 S S S U  
ERR2515226 S S S S  
ERR2515646 S S S S  
ERR2515156 S S S S  
ERR2515966 S S S S  
ERR2515462 S S S S  
ERR2515689 S S S S  
ERR2515540 R S S S  
ERR2515464 S S S S  
ERR2515270 S S S S  
ERR2515779 S S S S  
ERR2515435 S S S S  
ERR2515553 S S S S



Supplementary I

ERR2516076 S S S S  
ERR2515237 S S S S  
ERR2515522 S S S S  
ERR2515916 S S S S  
ERR2515314 S S S S  
ERR2515257 S S S S  
ERR2515572 S S S S  
ERR2515461 S S S R  
ERR2515964 S S S S  
ERR2516081 S S S S  
ERR2515653 S S S S  
ERR2515483 S S S S  
ERR2515134 S S S S  
ERR2516088 S S S S  
ERR2515828 S S S S  
ERR2515391 S S S S  
ERR2515905 S S S S  
ERR2515278 S S S S  
ERR2515841 S S S S  
ERR2516056 S S S S  
ERR2515617 S S S S  
ERR2515742 S S S S  
ERR2515298 S S S S  
ERR2515596 S S S S  
ERR2515128 S S S S  
ERR2516040 S S S S  
ERR2515803 S S S S  
ERR2515866 S S S S  
ERR2515821 S S S S  
ERR2515320 S S S S  
ERR2515853 S S S S  
ERR2515681 S S S S  
ERR2516094 S S S S  
ERR2515550 S S S S  
ERR2515869 S S S S  
ERR2515487 S S R S  
ERR2515453 S S S S  
ERR2515608 S S S S  
ERR2515627 S S S S  
ERR2515793 R S S S  
ERR2515722 S S S S  
ERR2515706 S S S S  
ERR2515829 S S S S  
ERR2515885 S S S S  
ERR2515827 S S S S  
ERR2515254 S S S S  
ERR2515312 S S S S  
ERR2515160 S S S R  
ERR2516062 S S S S  
ERR2515105 S S S S  
ERR2516026 S S S R  
ERR2515148 S S S S  
ERR2515651 S S S S

Supplementary I

ERR2515929 S S S S  
ERR2515184 S S S S  
ERR2515233 S S S S  
ERR2515201 S S S S  
ERR2515729 S S S S  
ERR2515161 S S S S  
ERR2515454 S S S S  
ERR2515723 S S S S  
ERR2515842 R S S S  
ERR2515778 S S S S  
ERR2515338 S S S S  
ERR2515545 S S S S  
ERR2515515 S S S S  
ERR2515198 S S S S  
ERR2515188 S S S S  
ERR2515783 S S S S  
ERR2515972 S S S S  
ERR2515527 S S S S  
ERR2515945 S S R S  
ERR2516080 S S S S  
ERR2515902 S S S S  
ERR2515125 S S S S  
ERR2515503 S S S S  
ERR2515289 S S S S  
ERR2515194 S S S S  
ERR2515256 S S S S  
ERR2515261 R S S R  
ERR2515316 S S S S  
ERR2515245 S R R S  
ERR2515715 S S S S  
ERR2516050 R S S R  
ERR2515154 S S S S  
ERR2515317 S S S S  
ERR2515642 S S S S  
ERR2515558 S S S S  
ERR2515181 S S S S  
ERR2515731 S S S R  
ERR2515395 S S S S  
ERR2515351 S S S S  
ERR2515752 S S S S  
ERR2515891 S S S S  
ERR2515838 S S S S  
ERR2515899 S S S S  
ERR2515951 S S S S  
ERR2515303 S S S S  
ERR2515858 R S S S  
ERR2515220 S S S S  
ERR2516082 S S S S  
ERR2515932 S S S S  
ERR2515714 R S S S  
ERR2515187 S S S S  
ERR2515985 S S S S  
ERR2515831 S S S S

Supplementary I

ERR2515504 R S S S  
ERR2515582 S S S S  
ERR2515381 S S S S  
ERR2516073 R S S S  
ERR2515276 S S S S  
ERR2515780 S S S S  
ERR2515468 S S S S  
ERR2515677 R R S S  
ERR2515893 R S S S  
ERR2515862 S S S S  
ERR2515141 S S S S  
ERR2515767 S S S S  
ERR2515434 S S S S  
ERR2515429 S S S S  
ERR2515255 R R S S  
ERR2516052 S S S S  
ERR2515264 R R R R  
ERR2515380 S S S S  
ERR2515379 S S S S  
ERR2516074 S R S S  
ERR2515730 S S S S  
ERR2515168 S S S S  
ERR2515638 S S S S  
ERR2515480 S S S S  
ERR2515459 S S S S  
ERR2515430 S S S U  
ERR2515796 S S S S  
ERR2515137 S S S S  
ERR2515843 S S S S  
ERR2515296 S S S U  
ERR2516042 S S S S  
ERR2515456 S S S S  
ERR2515792 S S S S  
ERR2515176 S S S S  
ERR2515120 S S S S  
ERR2515339 S S S S  
ERR2515668 S S S S  
ERR2515563 S S S S  
ERR2515683 S S S S  
ERR2515207 S S S S  
ERR2515215 S S S S  
ERR2515183 S S S S  
ERR2515378 S S S S  
ERR2516032 S S S S  
ERR2515421 S S S S  
ERR2515769 S S S S  
ERR2515813 S S S S  
ERR2515388 S S S S  
ERR2515680 S S S S  
ERR2515359 S S S S  
ERR2515439 R S S S  
ERR2515688 S S S S  
ERR2515551 S S S S

Supplementary I

ERR2515336 S S S S  
ERR2515692 S S S S  
ERR2515574 S S S S  
ERR2515185 R S S R  
ERR2515665 S S S S  
ERR2515127 S S S S  
ERR2515889 S S S S  
ERR2515366 S S S S  
ERR2515392 S S S S  
ERR2515299 S S S S  
ERR2515307 S S S S  
ERR2515816 S S S S  
ERR2515984 R S S S  
ERR2515404 S S S S  
ERR2515973 S S S S  
ERR2515536 S S S S  
ERR2515492 S S S S  
ERR2515968 S S S S  
ERR2515393 S S S S  
ERR2515561 S S S S  
ERR2516071 S S S S  
ERR2515593 S S S S  
ERR2515707 S S S S  
ERR2515620 S S S S  
ERR2515496 S S S S  
ERR2515394 S S S S  
ERR2515516 S S S S  
ERR2515621 S S U S  
ERR2515981 S S S S  
ERR2515746 S S S U  
ERR2515913 S S S S  
ERR2515450 S S S S  
ERR2515244 S S S S  
ERR2515259 S S S S  
ERR2515426 S S R S  
ERR2515370 S S R S  
ERR2515852 R S S S  
ERR2515736 S S S S  
SAMN03648526 S S S S  
ERR2515535 S S S S  
ERR2515196 S S S S  
ERR2515340 S S S S  
ERR2515517 S S S S  
ERR2515424 S S S S  
ERR2515914 S S S S  
ERR2515659 S S S S  
ERR2515251 S S S S  
ERR2516039 S S S S  
ERR2515775 S S S S  
ERR2515357 S S S S  
ERR2515956 R R S S  
ERR2515241 S S S S  
ERR2515883 S S S S

Supplementary I

ERR2515428 S S S S  
ERR2515400 R S R R  
ERR2515471 S S S S  
ERR2515785 S S S S  
ERR2515476 S S S S  
ERR2515773 S S S S  
ERR2515616 S S S S  
ERR2516084 S S S S  
ERR2515564 S S S S  
ERR2516000 S S S S  
ERR2515555 S S S S  
SAMN03648527 S S S S  
SAMN03648528 S S S S  
ERR2509680 S S S S  
SAMN03648529 S S S S  
ERR2509681 S S S S  
ERR2515193 S S S S  
ERR2515367 S S S S  
ERR2515624 S S S S  
ERR2515171 S S S S  
ERR2515687 S S S R  
ERR2515164 S S S S  
ERR2515991 S S S S  
ERR2515409 R R S R  
ERR2515478 S S S S  
ERR2515696 S S S S  
ERR2515262 R R R S  
ERR2515836 S S S S  
ERR2515204 S S S S  
ERR2515162 S S S S  
ERR2515804 S S S S  
ERR2516152 R R S S  
ERR2516124 S S S S  
ERR2516160 R R S S  
ERR2516145 S S S S  
ERR2516143 R R S S  
ERR2516111 S R S S  
ERR2516125 R R S S  
ERR2516138 R R R R  
ERR2516147 S S S S  
ERR2516158 R S S S  
ERR2516135 S S S R  
ERR2516136 R R R R  
ERR2516161 R R R R  
ERR2516151 R S R S  
ERR2516122 S S S S  
ERR2516132 R S S S  
ERR2516103 S S S S  
ERR2516155 S S S S  
ERR2516123 S R S S  
ERR2516153 R S S S  
ERR2516141 S S S U  
ERR2516144 S S S S

Supplementary I

ERR2516121 S S S S  
ERR2516117 S S S S  
ERR2516102 S S S S  
ERR2516105 S S S S  
ERR2516126 S S S S  
ERR2516110 S S S S  
ERR2516130 S S S S  
ERR2516164 S S S S  
ERR2516146 S S S U  
ERR2516148 S S S S  
ERR2516133 S S S S  
ERR2516142 S S S S  
ERR2516157 S S S S  
ERR2516119 S S S S  
ERR2516140 S S S S  
ERR2516163 S S S S  
ERR2516159 S S S S  
ERR2516113 S S S S  
ERR2516128 S S S S  
ERR2516112 S S S S  
ERR2516137 S S S S  
ERR2516150 R S S S  
ERR2516118 S S S S  
SAMN03648530 S S S S  
ERR2516139 S S S S  
ERR2516109 S S S S  
ERR2516149 S S S S  
ERR2516165 S S S S  
ERR2516116 S S S S  
ERR2516115 S S S S  
ERR2516114 S S S S  
ERR2516104 S S S S  
ERR2516120 S S S U  
ERR2516129 R R R S  
ERR2516131 S S S S  
ERR2516156 S S S S  
ERR2516106 S S S S  
ERR2516107 S S S S  
ERR2516162 S S S S  
ERR2516127 S S S S  
ERR2516134 S S S S  
SAMN03648531 S S S S  
SAMN03648532 S S S S  
ERR2516108 S S S S  
ERR2516154 S S S S  
ERR2515363 S S S S  
ERR2516051 S S S S  
ERR2515907 S R S S  
ERR2515822 S S S S  
ERR2515718 S S S S  
ERR2515865 S S S S  
ERR2515280 S S S S  
ERR2515895 S S S S

Supplementary I

ERR2515413 S S S S  
ERR2515618 S S S S  
ERR2515494 S S S S  
ERR2515820 S S S S  
ERR2515306 S S S S  
ERR2515904 S S S S  
ERR2515928 S S S S  
ERR2515343 S S S S  
ERR2517022 R R S R  
ERR2516989 R R U U  
ERR2517021 R R S S  
ERR2516751 R R U S  
ERR2517068 R R S S  
ERR2517120 R R S S  
ERR2517097 R R U R  
ERR2516763 R R U S  
ERR2516743 R R U U  
ERR2516935 R R R R  
ERR2516990 R R U R  
ERR2516808 R R S S  
ERR2517017 R R U S  
ERR2516790 R R U U  
ERR2516881 R R U S  
ERR2516929 R R R R  
ERR2517066 R R R S  
ERR2516901 R R U R  
ERR2516752 R R U R  
ERR2517062 R R U S  
ERR2516775 R R U R  
ERR2517077 R R U U  
ERR2516861 R R U S  
ERR2516945 R R U S  
ERR2516848 R R U S  
ERR2516917 R R U R  
ERR2516773 R R U U  
ERR2517118 R R R R  
ERR2516758 R R S S  
ERR2517038 R R U S  
ERR2516883 R R U U  
ERR2516832 R R S S  
ERR2516833 R R U S  
ERR2516845 R R S R  
ERR2517063 R R S R  
ERR2516804 R R S S  
ERR2516754 R R S S  
ERR2516844 R R R S  
ERR2517019 R R R R  
ERR2516912 R R S S  
ERR2517089 R R R S  
ERR2516978 R R U R  
ERR2517078 R R S S  
ERR2516810 R R S R  
ERR2516939 R R R R

Supplementary I

ERR2516891 R R R R  
ERR2517045 R R U R  
ERR2516966 S S S S  
ERR2516849 R R U S  
ERR2516968 R R R R  
ERR2516982 R R R R  
ERR2517044 R R S U  
ERR2517084 R R U S  
ERR2516974 R R U S  
ERR2517101 R R U S  
ERR2516777 R R U R  
ERR2517074 R R S R  
ERR2516862 R R U S  
ERR2516952 S S S S  
ERR2516780 R R U S  
SAMN03648533 S S S S  
ERR2516957 S U S S  
ERR2516769 R R U R  
ERR2517029 R R S S  
ERR2516828 U R R S  
ERR2516867 R R U R  
ERR2516805 R R R R  
ERR2517093 R R U S  
ERR2516794 R U S S  
ERR2517110 R R S S  
ERR2516960 R R R R  
ERR2517079 R R S S  
ERR2516829 R R R R  
ERR2517061 S S S S  
ERR2516843 R R R S  
ERR2517010 R R U R  
ERR2517030 S S S S  
ERR2517086 R R U U  
ERR2517067 R R U R  
ERR2517056 R R U S  
ERR2516802 R R U R  
ERR2516847 R R U S  
ERR2516913 R R S S  
ERR2516949 R R U R  
ERR2516850 R R U U  
ERR2517057 R R U S  
ERR2516834 R R S S  
ERR2516823 R R S S  
ERR2516899 R R R R  
ERR2516796 S S S S  
ERR2516814 R R S S  
ERR2516782 R R S S  
ERR2517004 R R R S  
ERR2516930 S S S S  
ERR2516817 R R S R  
ERR2516915 R R U U  
ERR2517103 R R S S  
ERR2516824 R R R R



Supplementary I

ERR2517085 R R S S  
ERR2517109 S S S S  
ERR2516909 R R S S  
ERR2516839 R R U S  
ERR2516764 R R U S  
ERR2516871 R R U S  
ERR2516880 R R U R  
ERR2517033 R R U R  
ERR2516994 R R R R  
ERR2516905 R R U S  
ERR2517042 R R S S  
ERR2517123 R R S R  
ERR2516852 R R U U  
ERR2517076 R R U S  
ERR2516886 R R R S  
ERR2516928 R R S S  
ERR2516911 R R R R  
ERR2517047 R R R R  
ERR2516811 R R R S  
ERR2517090 R R R S  
ERR2516981 R R R S  
ERR2516988 R R S S  
ERR2516742 R R R S  
ERR2516950 R R R S  
ERR2516941 R R S S  
ERR2517054 U R S R  
ERR2516979 R R U R  
ERR2516778 R R U S  
ERR2516942 R R U S  
ERR2516841 R R R R  
ERR2516894 R R U S  
ERR2516910 R R R R  
ERR2516898 R R R R  
ERR2517114 R R U U  
ERR2517125 R R U R  
ERR2516815 R R U U  
ERR2517112 R R U R  
ERR2517041 R R U R  
ERR2517082 R R R S  
ERR2516992 S S S S  
ERR2516767 R R R S  
ERR2516934 R R S R  
ERR2516946 R R U S  
ERR2517075 R R U S  
ERR2516784 R R R R  
ERR2516846 R R R R  
ERR2516781 R R R S  
ERR2516920 R R R U  
ERR2516937 R R S S  
ERR2516947 R R U S  
ERR2516801 R R R R  
ERR2517055 R R U R  
ERR2516933 R R S S

Supplementary I

ERR2516772 R R U R  
ERR2516984 R R U S  
ERR2517087 R U R R  
ERR2516756 R R U U  
ERR2516922 R R U U  
ERR2517000 R R R R  
ERR2516771 R R U U  
ERR2517013 R R R R  
ERR2517106 R R U U  
ERR2516925 R R S S  
ERR2517107 R R R S  
ERR2517018 R R R R  
ERR2516825 R R R R  
ERR2517064 R R U S  
ERR2516821 R R R S  
ERR2516806 R R U U  
ERR2516750 R R S S  
ERR2516889 S U S S  
ERR2516926 R R R R  
ERR2517121 R R S S  
ERR2516908 R R U R  
ERR2516840 R R U R  
ERR2516969 R R U S  
ERR2516932 R R U S  
ERR2517111 R R S S  
ERR2516863 R R R S  
ERR2516783 R R S R  
ERR2516793 R R R S  
ERR2516830 S S S S  
ERR2516744 R U S S  
ERR2516859 R R S S  
ERR2516762 S U S S  
ERR2516819 R R R S  
ERR2516809 R R R S  
ERR2516803 R R U U  
ERR2517016 R R R R  
ERR2517026 R R S S  
ERR2517116 R R U U  
ERR2516807 R R U S  
ERR2517073 U R S S  
ERR2517094 R R S S  
ERR2517007 R R S S  
ERR2516944 R R S S  
ERR2516868 R R R R  
ERR2516897 R R U U  
ERR2516962 R R S S  
ERR2517060 R R S S  
ERR2517037 R R S S  
ERR2516980 R R R S  
ERR2516993 R R R R  
ERR2516768 R R U U  
ERR2516858 R R U U  
ERR2516975 R R R S

Supplementary I

ERR2517050 S S S S  
ERR2516875 R R R R  
ERR2517005 R R R R  
ERR2516786 R R S S  
ERR2517052 R R U S  
ERR2516951 R R U S  
SAMN03648534 S S S S  
ERR2516902 R R U S  
ERR2516826 R R U S  
ERR2516878 R R S S  
ERR2517081 R R U S  
ERR2516791 R R U S  
ERR2516885 R R U S  
ERR2517058 S S S S  
ERR2516836 R R U U  
ERR2516877 R R U U  
ERR2516749 R R U S  
ERR2516943 R R R S  
ERR2516940 R R U R  
ERR2516961 R R U S  
ERR2517002 R R U S  
ERR2516866 R R U S  
ERR2516874 R R U S  
ERR2516755 R S S S  
ERR2516774 R R R R  
ERR2516956 R R U S  
ERR2517069 R R S R  
ERR2516964 R R R S  
ERR2516740 R R S S  
ERR2516921 R R U U  
ERR2517059 R R R S  
ERR2516746 R R S S  
ERR2517115 R R S S  
ERR2516985 R R R R  
ERR2516904 R R S S  
SAMN03648535 S S S S  
ERR2517031 R R R S  
ERR2516792 R R R S  
ERR2517104 R R S S  
ERR2517065 R U S S  
ERR2517124 R R S S  
ERR2516973 R R R R  
ERR2516813 R R U S  
ERR2516983 R R U R  
ERR2516914 R R S R  
ERR2517011 R R R R  
ERR2516976 R R S S  
ERR2517092 R R R R  
ERR2517100 R R U R  
ERR2516967 R R U S  
ERR2516870 R R R R  
ERR2516795 R R R S  
ERR2516895 R R U R

Supplementary I

ERR2517117 R R U S  
ERR2517113 R R U S  
ERR2516842 R R U R  
ERR2517119 R R U S  
ERR2516873 S S S S  
ERR2517046 R R U R  
ERR2516818 R R S S  
ERR2517051 S S S S  
ERR2516931 R R U S  
ERR2516797 R U U R  
ERR2517039 R R S S  
ERR2516853 R R U U  
ERR2517096 R R U U  
ERR2516959 R R R R  
ERR2517088 R R S S  
ERR2517001 R R U U  
ERR2517095 R R U S  
ERR2516977 R R U R  
ERR2516800 R R U U  
ERR2516820 R R S S  
ERR2516765 R R U U  
ERR2516888 R R R S  
ERR2516872 R R R R  
ERR2516997 R R U S  
ERR2516953 R R S S  
ERR2516759 R R U R  
ERR2517083 R R U R  
ERR2517071 R R U R  
ERR2516865 R R U S  
ERR2516986 R R U S  
ERR2516788 R R R R  
ERR2517032 R R S R  
ERR2516882 R R U R  
ERR2516938 R R U U  
ERR2516963 R R R S  
ERR2517098 R R U S  
ERR2516745 R R S S  
ERR2517070 R R R S  
ERR2517049 R R U S  
ERR2517080 R R U S  
ERR2517122 R R R R  
ERR2516958 R R U U  
ERR2516766 R R U S  
ERR2516907 R R U S  
ERR2516770 R R U S  
ERR2516893 R R U R  
ERR2516999 R U S S  
ERR2516927 R R U R  
ERR2516869 S S S S  
ERR2517015 R R U R  
ERR2517108 R R R R  
ERR2516987 R R S S  
ERR2517008 R R R R

Supplementary I

ERR2517025 R R S S  
ERR2516747 R R U S  
ERR2517012 R R R S  
ERR2516856 R R R S  
ERR2516879 R R R S  
ERR2517003 R R U R  
ERR2517009 R R U R  
ERR2516996 R R U R  
ERR2516757 R R R R  
ERR2516837 R U S S  
ERR2516864 R U S S  
ERR2516831 R R U R  
ERR2516906 R R U S  
ERR2516753 R R S S  
ERR2517028 R R S S  
ERR2516936 R U U S  
ERR2516954 R R U S  
ERR2516857 R R U S  
ERR2516798 R R R R  
ERR2516779 R R R S  
ERR2517105 S S S S  
ERR2516785 U R S S  
ERR2516776 R S S S  
ERR2516787 R R R R  
ERR2516919 R S S S  
ERR2516998 R R R R  
ERR2517020 R R U S  
ERR2516741 S S S S  
ERR2516835 R R U S  
ERR2516760 R R S U  
ERR2516972 R R S S  
ERR2517036 R R S S  
ERR2516748 R R R S  
ERR2517102 S S S S  
ERR2516887 U R S S  
ERR2517027 R R S S  
ERR2516851 R R U R  
ERR2516799 R R R S  
ERR2517072 S S S S  
ERR2517048 U S S S  
ERR2516827 R R S R  
ERR2517023 R R R S  
ERR2517014 R R R R  
SAMN03648536 S S S S  
ERR2517091 R R S S  
ERR2516789 R R S S  
ERR2516890 R R U R  
ERR2516971 R R S R  
ERR2516918 R R S S  
ERR2516838 R R U S  
ERR2516860 R S S S  
ERR2516916 R R R S  
ERR2517035 R R S S

Supplementary I

ERR2516812 R R R R  
ERR2516923 R R S S  
ERR2516854 R R R R  
ERR2517053 R R R R  
ERR2517099 R R U R  
ERR2516855 R R S S  
ERR2516816 U U U S  
ERR2516892 R R U S  
ERR2517006 R R U S  
ERR2516955 R R U R  
ERR2516991 R R R S  
ERR2516903 R R S S  
ERR2516900 R R R S  
ERR2517043 R R S S  
ERR2516948 R R S S  
ERR2516822 R R R R  
ERR2516761 R R U S  
ERR2516970 R R R S  
ERR2516965 R R S R  
ERR2516896 R R S S  
ERR2516924 R R R S  
ERR2516876 R R U S  
ERR2517034 R R S S  
ERR2517024 R R U S  
ERR2516995 R R U R  
ERR2516884 R R R S  
ERR2517040 R R U S  
SAMN03648537 S S S R  
SAMN03648538 S S S S  
SAMN03648539 S S S S  
SAMN03648540 S S S S  
SAMN03648541 S S S S  
SAMN03648542 S S S S  
ERR2509674 S S S S  
ERR2509675 S S S S  
SAMN03648543 S S S S  
SAMN03648544 S S S S  
ERR2509682 S S S S  
ERR2509880 S S S S  
ERR2509881 S S S S  
ERR2509882 S S S S  
ERR2509883 S S S S  
SAMN03648545 S S S S  
SAMN03648546 S S S S  
SAMN03648547 S S S S  
SAMN03648548 S S S S  
SAMN03648549 S S S S  
SAMN03648550 S S S S  
SAMN03648551 S S S R  
SAMN03648552 S S S S  
SAMN03648553 R S S S  
SAMN03648554 R R S R  
SAMN03648555 S S S S

Supplementary I

SAMN03648556 R S S S  
SAMN03648557 S S S S  
SAMN03648558 R S S S  
SAMN03648559 R S S S  
SAMN03648560 S S S S  
SAMN03648561 S S S S  
SAMN03648562 S S S S  
SAMN03648563 R S S R  
ERR2510838 R R R U  
ERR2510832 R R R R  
ERR2510674 R R R R  
ERR2510675 R R S S  
ERR2510676 R R R R  
ERR2510677 R R S S  
ERR2510833 R R R S  
ERR2510695 R R R R  
ERR2510678 R R R R  
ERR2510834 R R R S  
ERR2510715 R R R R  
ERR2510839 R R R S  
ERR2510655 R R U R  
ERR2510841 R R S R  
ERR2510843 R R R S  
ERR2510845 R R R R  
ERR2510329 R R R R  
ERR2510840 R R R S  
ERR2510848 R R R R  
ERR2510842 R R R S  
ERR2510827 R R S R  
ERR2510844 R R R R  
ERR2510690 R R R R  
ERR2510702 R R R R  
ERR2510847 R R S S  
ERR2510703 R R R R  
ERR2510849 R R R S  
ERR2510653 R R S R  
ERR2510846 R R R R  
ERR2510852 R R R R  
ERR2510853 R R R R  
ERR2510854 R R S S  
ERR2510855 R R S R  
ERR2510856 R R R S  
ERR2510857 R R R S  
ERR2510858 R R S S  
ERR2510709 R R R R  
ERR2510723 R R R R  
ERR2510682 R R R R  
ERR2510862 R R R R  
ERR2510863 R R R R  
ERR2510864 R R R R  
ERR2510865 R R S R  
ERR2510866 R R S S  
ERR2510867 R R R R

Supplementary I

ERR2510868 R R S S  
ERR2510869 R R R U  
ERR2510696 R R S R  
ERR2510851 R R R R  
ERR2510859 R R R S  
ERR2510872 R R R R  
ERR2510824 R R U U  
ERR2510874 R R U U  
ERR2510875 R R U U  
ERR2510876 R R S R  
ERR2510877 R R U U  
ERR2510878 R R R R  
ERR2510701 R R U U  
ERR2510686 R R R R  
ERR2510666 R R R R  
ERR2510667 U U U R  
ERR2510669 R R R R  
ERR2510730 R R R R  
ERR2510731 R R S S  
ERR2510732 R R S S  
ERR2510734 R R R R  
ERR2510850 R R R R  
ERR2510880 R R S R  
ERR2510735 R R R R  
ERR2510656 R R U U  
ERR2510657 R R U R  
ERR2510881 R R R S  
ERR2510704 R R R R  
ERR2510705 R R R S  
ERR2510706 R R S R  
ERR2510707 R R R R  
ERR2510708 R R S R  
ERR2510658 R R S R  
ERR2510659 R R S S  
ERR2510660 R R R R  
ERR2510661 R R S S  
ERR2510459 R R R R  
ERR2510662 R R S S  
ERR2510663 R R R R  
ERR2510664 R R S S  
ERR2510665 R R S S  
ERR2510668 R R R R  
ERR2510710 R R R R  
ERR2510670 R R R R  
ERR2510671 R R R R  
ERR2510673 R R R R  
ERR2510679 R R S S  
ERR2510882 R R R R  
ERR2510711 R R R R  
ERR2510712 R R S R  
ERR2510713 R R R R  
ERR2510714 R R R R  
ERR2510716 R R R R



Supplementary I

ERR2510717 R R R R  
ERR2510718 R R S S  
ERR2510719 R R R R  
ERR2510720 R R S R  
ERR2510721 R S R S  
ERR2510722 R R U S  
ERR2510680 R R S R  
ERR2510681 R S S S  
ERR2510724 R R U U  
ERR2510683 R R R S  
ERR2510254 R R R R  
ERR2510279 R R R R  
ERR2510684 R R R S  
ERR2510685 R R R R  
ERR2510725 R R R S  
ERR2510510 R R R R  
ERR2510726 R R R R  
ERR2510687 R R S S  
ERR2510688 R R S S  
ERR2510689 R R R R  
ERR2510733 R R R R  
ERR2510691 R R S S  
ERR2510692 R R R R  
ERR2510693 R R R S  
ERR2510694 R R R S  
ERR2510727 R R U R  
ERR2510728 R R S S  
ERR2510360 R R R R  
ERR2510729 R R R R  
ERR2510654 R R R R  
ERR2510823 R R S S  
ERR2510826 R R S R  
ERR2510672 R R S S  
ERR2510736 S S S S  
ERR2510835 S S S S  
ERR2510818 S S S S  
ERR2510738 S S S S  
ERR2510737 S S S S  
ERR2510739 S S S S  
ERR2510810 S S S S  
ERR2510829 S S S S  
ERR2510836 S S S S  
ERR2510819 S S S S  
ERR2510831 S S S S  
ERR2510813 S S S S  
ERR2510812 S S S S  
ERR2510820 S S S S  
ERR2510808 S S S S  
ERR2510830 S S S S  
ERR2510837 S S S S  
ERR2510821 S S S S  
ERR2510807 S S S S  
ERR2510816 S S S S

Supplementary I

ERR2510814 S S S S  
ERR2510811 S S S S  
ERR2510809 S S S S  
ERR2510740 S S S S  
ERR2510741 S S S S  
ERR2510742 S S S R  
ERR2510743 S S S S  
ERR2510744 S S S S  
ERR2510745 S S S S  
ERR2510746 S S S S  
ERR2510747 S S S S  
ERR2510748 S S S S  
ERR2510749 S S S S  
ERR2510750 S S S S  
ERR2510751 S S S S  
ERR2510752 S S S S  
ERR2510753 S S S S  
ERR2510754 S S S S  
ERR2510755 S S S S  
ERR2510756 S S S S  
ERR2510758 S S S S  
ERR2510759 S S S S  
ERR2510760 S S S S  
ERR2510761 S S S S  
ERR2510762 S S S U  
ERR2510763 S S S S  
ERR2510764 S S S S  
ERR2510765 S S S S  
ERR2510766 S S S S  
ERR2510767 S S S S  
ERR2510768 S S S S  
ERR2510769 S S S S  
ERR2510770 S S S S  
ERR2510771 S S S S  
ERR2510772 S S S S  
ERR2510773 S S S S  
ERR2510774 S S S S  
ERR2510775 S S S S  
ERR2510776 S S S S  
ERR2510777 S S S S  
ERR2510778 S S S S  
ERR2510779 S S S S  
ERR2510780 S S S S  
ERR2510781 S S S S  
ERR2510782 S S S S  
ERR2510783 S S S S  
ERR2510784 S S S S  
ERR2510785 S S S S  
ERR2510786 S S S S  
ERR2510787 S S S S  
ERR2510788 S S S S  
ERR2510789 S S S S  
ERR2510790 S S S S

Supplementary I

ERR2510791 S S S S  
ERR2510792 S S S S  
ERR2510793 S S S S  
ERR2510794 S S S S  
ERR2510795 S S S S  
ERR2510796 S S S S  
ERR2510797 S S S S  
ERR2510798 S S S S  
ERR2510799 S S S S  
ERR2510800 S S S S  
ERR2510801 S S S S  
ERR2510802 S S S S  
ERR2510803 S S S S  
ERR2510804 S S S S  
ERR2510805 S S S S  
ERR2510806 S S S S  
ERR2510817 R S S S  
ERR2510822 S S S S  
ERR2510828 S S S S  
ERR2515436 S R R S  
ERR2515202 R R S R  
ERR2515764 S S S S  
ERR2515585 S R S S  
ERR2516030 S S S S  
SAMN03648564 S S S S  
SAMN03648565 S S S S  
SAMN03648566 S S S S  
ERR2515763 S S S S  
ERR2515485 S S S S  
ERR2515543 S S S S  
ERR2515969 S R S S  
ERR2515691 R R S S  
ERR2515451 S S S S  
ERR2515950 R R R S  
ERR2515748 R R S S  
ERR2515130 R R S R  
ERR2515247 R R R R  
ERR2515679 S S S S  
ERR2515870 S S S S  
ERR2515332 S S S S  
ERR2515323 S R S S  
ERR2515352 S S S S  
ERR2515900 S S S S  
ERR2515701 S R S S  
ERR2515438 S R S S  
ERR2515205 S R S R  
ERR2515661 S R S S  
SAMN03648567 S S S S  
SAMN03648568 S S S S  
ERR2509684 R S S S  
ERR2509884 R R U S  
ERR2509885 S S S S  
ERR2509886 S S S S

Supplementary I

ERR2509887 R S S S  
ERR2509888 S S S S  
ERR2509889 R S S S  
SAMN03648569 S S S S  
SAMN03648570 S S S S  
ERR2509677 S S S S  
ERR2509890 S S S S  
ERR2509891 S S S S  
ERR2509892 R S S S  
SAMN03648571 S S S S  
SAMN03648572 S S S S  
SAMN03648573 S S S S  
SAMN03648574 S S S S  
SAMN03648575 S S S S  
SAMN03648576 S S S S  
SAMN03648577 S S S S  
SAMN03648578 S S S S  
SAMN03648579 S S S S  
SAMN03648580 S S S S  
ERR2516086 S S S S  
ERR2515603 R R S S  
ERR2515738 S R S S  
ERR2515611 S R S S  
ERR2517126 S S S S  
ERR2517127 S S S S  
ERR2517128 S S S S  
ERR2517129 S S S S  
ERR2517130 S S S U  
ERR2517131 S S S S  
ERR2517132 S S S S  
ERR2517133 S S S S  
ERR2517134 R S S S  
ERR2517135 S S S S  
ERR2517136 S S S S  
ERR2517137 R S S S  
ERR2517138 S S S S  
ERR2517139 S S S S  
ERR2517140 S S S S  
ERR2517141 S S S S  
ERR2517142 S S S S  
ERR2517143 S S S S  
ERR2517144 S S S S  
ERR2517145 S S S S  
ERR2517146 S S S S  
ERR2517147 S S S U  
ERR2517148 S S S S  
ERR2517149 S S S S  
ERR2517150 S S S S  
ERR2517151 S S S R  
ERR2517152 S S S S  
ERR2517153 S S S S  
ERR2517154 S S S S  
ERR2517155 S S S S

Supplementary I

ERR2517156 S S S S  
ERR2517157 R S S S  
ERR2517158 S S S S  
ERR2517159 S S S S  
ERR2517160 S S S S  
ERR2517161 S S S S  
ERR2517162 S S S S  
ERR2517163 S S S S  
ERR2517164 S S S S  
ERR2517165 S S S S  
ERR2517166 S S S R  
ERR2517167 S S S S  
ERR2517168 S S S S  
ERR2517169 S S S S  
ERR2517170 S S S S  
ERR2517171 S S S S  
ERR2517172 S S S S  
ERR2517173 S S S S  
ERR2517174 S S S S  
ERR2517175 S S S S  
ERR2517176 S S S S  
ERR2517177 S S S U  
ERR2517178 S S S S  
ERR2517179 S S S R  
ERR2517180 S S S S  
ERR2517181 S S S S  
ERR2517182 S S S S  
ERR2517183 S S S S  
ERR2517184 S S S S  
ERR2517185 S S S S  
ERR2517186 S S S S  
ERR2517187 S S S S  
ERR2517188 R R U S  
ERR2517189 S S S S  
ERR2517190 S S S S  
ERR2517191 S S S U  
ERR2517192 S S S S  
ERR2517193 R R U S  
ERR2517194 S S S S  
ERR2517195 S S S R  
ERR2517196 S S S S  
ERR2517197 S S S S  
ERR2517198 S S S S  
ERR2517199 S S S S  
ERR2517200 S S S S  
ERR2517201 S S S S  
ERR2517202 S S S S  
ERR2517203 S S S U  
ERR2517204 S S S U  
ERR2517205 S S S S  
ERR2517206 S S S S  
ERR2517207 S S S S  
ERR2517208 S S S S

Supplementary I

ERR2517209 S S S S  
ERR2517210 S S S S  
ERR2517211 S S S S  
ERR2517212 S S S S  
ERR2517213 S S S S  
ERR2517214 S S S S  
ERR2517215 S S S S  
ERR2517216 S S S S  
ERR2517217 S S S S  
ERR2517218 S S S S  
ERR2517219 S S S U  
ERR2517220 R S S S  
ERR2517221 S S S S  
ERR2517222 S S S S  
ERR2517223 S S S S  
ERR2517224 S S S S  
ERR2517225 S S S S  
ERR2517226 S S S S  
ERR2517227 S S S R  
ERR2517228 S S S S  
ERR2517229 S S S U  
ERR2517230 S S S S  
ERR2517231 S S S S  
ERR2517232 R S S S  
ERR2517233 S S S R  
ERR2517234 S S S S  
ERR2517235 R S S S  
ERR2517236 S S S S  
ERR2517237 S S S S  
ERR2517238 S S S S  
ERR2517239 S S S R  
ERR2517240 S S S S  
ERR2517241 S S S S  
ERR2517242 S S S S  
ERR2517243 S S S U  
ERR2517244 U S S S  
ERR2517245 S S S S  
ERR2517246 S S S S  
ERR2517247 S S S S  
ERR2517248 S S S S  
ERR2517249 S S S S  
ERR2517250 R S S S  
ERR2517251 S S S S  
ERR2517252 S S S S  
ERR2517253 S S S S  
ERR2517254 U S S S  
ERR2517255 S S S S  
ERR2517256 S S S S  
ERR2517257 S S S S  
ERR2517258 S S S S  
ERR2517259 R R S S  
ERR2517260 S R S S  
ERR2517261 S S S S

Supplementary I

ERR2517262 U S S S  
ERR2517263 S S S S  
ERR2517264 S S S S  
ERR2517265 S S S U  
ERR2517266 S S S U  
ERR2517267 S S S S  
ERR2517268 S S S U  
ERR2517269 S S S S  
ERR2517270 S S S S  
ERR2517271 S S S S  
ERR2517272 S S S S  
ERR2517273 S S S S  
ERR2517274 R S S S  
ERR2517275 U S S S  
ERR2517276 S S S R  
ERR2517277 S S S S  
ERR2517278 S S S S  
ERR2517279 S S S S  
ERR2517280 S S S S  
ERR2517281 R S S S  
ERR2517282 S S S S  
ERR2517283 S S S S  
ERR2517284 S S S U  
ERR2517285 S S S S  
ERR2517286 S S S S  
ERR2517287 S S S S  
ERR2517288 S S S S  
ERR2517289 R S S S  
ERR2517290 S S S S  
ERR2517291 S S S S  
ERR2517292 S S S S  
ERR2517293 S S S S  
ERR2517294 S S S S  
ERR2517295 S S S S  
ERR2517296 S S S S  
ERR2517297 S S S S  
ERR2517298 S S S U  
ERR2517299 S S S S  
ERR2517300 S S S S  
ERR2517301 R S S S  
ERR2517302 S S S S  
ERR2517303 S S S S  
ERR2517304 S S S R  
ERR2517305 R S S S  
ERR2517306 S S S S  
ERR2517307 R R R R  
ERR2517308 S S S U  
ERR2517309 R S S S  
ERR2517310 S S S U  
ERR2517311 S S S S  
ERR2517312 S S S S  
ERR2517313 S S S S  
ERR2517314 S S S S

Supplementary I

ERR2517315 S S S U  
ERR2517316 S S S S  
ERR2517317 S S S S  
ERR2517318 R S S S  
ERR2517319 S S S S  
ERR2517320 U S S S  
ERR2517321 S S S S  
ERR2517322 S S S S  
ERR2517323 S S S U  
ERR2517324 S S S S  
ERR2517325 S S S S  
ERR2517326 S S S S  
ERR2517327 S S S S  
ERR2517328 S S S S  
ERR2517329 S S S S  
ERR2517330 S S S U  
ERR2517331 S S S S  
ERR2517332 S S S S  
ERR2517333 R R S R  
ERR2517334 S S S S  
ERR2517335 R S S S  
ERR2517336 S S S S  
ERR2517337 S S S S  
ERR2517338 S S S S  
ERR2517339 S S S S  
ERR2517340 S S S S  
ERR2517341 S S S S  
ERR2517342 R R S S  
ERR2517343 S S S S  
ERR2517344 S S S S  
ERR2517345 S S S S  
ERR2517346 S S S U  
ERR2517347 S S S S  
ERR2517348 S S S S  
ERR2517349 S S S R  
ERR2517350 S S S S  
ERR2517351 S S S S  
ERR2517352 S S S S  
ERR2517353 S S S S  
ERR2517354 S S S S  
ERR2517355 S S S S  
ERR2517356 S S S U  
ERR2517357 S S S R  
ERR2517358 S S S S  
ERR2517359 S S S S  
ERR2517360 S S S S  
ERR2517361 S S S S  
ERR2517362 S S S S  
ERR2517363 R S S S  
ERR2517364 S S S S  
ERR2517365 S S S S  
ERR2517366 S S S S  
ERR2517367 S S S S



Supplementary I

ERR2517368 S S S R  
ERR2517369 S S S S  
ERR2517370 S S S S  
ERR2517371 R R U R  
ERR2517372 S S S S  
ERR2517373 S S S S  
ERR2517374 S S S S  
ERR2517375 S S S S  
ERR2517376 S S S S  
ERR2517377 S S S S  
ERR2517378 S S S S  
ERR2517379 R R S S  
ERR2517380 S S S S  
ERR2517381 S S S S  
ERR2517382 S S S S  
ERR2517383 S S S U  
ERR2517384 S S S S  
ERR2517385 S S S U  
ERR2517386 S S S S  
ERR2517387 S S S S  
ERR2517388 S S S S  
ERR2517389 S S S S  
ERR2517390 S S S U  
ERR2517391 S S S U  
ERR2517392 S S S S  
ERR2517393 S S S S  
ERR2517394 S S S S  
ERR2517395 S S S S  
ERR2517396 S S S S  
ERR2517397 S S S S  
ERR2517398 S S S U  
ERR2517399 S S S S  
ERR2517400 S S S S  
ERR2517401 S S S S  
ERR2517402 S S S S  
ERR2517403 S S S S  
ERR2517404 S S S S  
ERR2517405 S S S S  
ERR2517406 S S S S  
ERR2517407 S S S S  
ERR2517408 S S S R  
ERR2517409 S S S S  
ERR2517410 R S S S  
ERR2517411 S S S S  
ERR2517412 S S S S  
ERR2517413 S S S S  
ERR2517414 S S S S  
ERR2517415 S S S S  
ERR2517416 S S S S  
ERR2517417 S S S S  
ERR2517418 S S S S  
ERR2517419 S S S S  
ERR2517420 S S S S

Supplementary I

ERR2517421 S S S S  
ERR2517422 S S S S  
ERR2517423 S S S S  
ERR2517424 S S S S  
ERR2517425 S S S R  
ERR2517426 R S S S  
ERR2517427 S S S U  
ERR2517428 S S S S  
ERR2517429 S S S S  
ERR2517430 S S S S  
ERR2517431 S S S S  
ERR2517432 S S S S  
ERR2517433 R S S S  
ERR2517434 S S S S  
ERR2517435 S S S U  
ERR2517436 R R U R  
ERR2517437 S S S S  
ERR2517438 S S S S  
ERR2517439 S S S S  
ERR2517440 R S S S  
ERR2517441 S S S S  
ERR2517442 S S S S  
ERR2517443 S S S R  
ERR2517444 S S S U  
ERR2517445 S S S S  
ERR2517446 S S S S  
ERR2517447 S S S S  
ERR2517448 S S S S  
ERR2517449 S S S S  
ERR2517450 S S S S  
ERR2517451 S S S S  
ERR2517452 S S S S  
ERR2517453 S S S S  
ERR2517454 S S S S  
ERR2517455 S S S S  
ERR2517456 S S S S  
ERR2517457 S S S S  
ERR2517458 S S S U  
ERR2517459 S S S S  
ERR2517460 S S S S  
ERR2517461 S S S S  
ERR2517462 S S S S  
ERR2517463 S S S S  
ERR2517464 S S S S  
ERR2517465 S S S U  
ERR2517466 S S S S  
ERR2517467 S S S S  
ERR2517468 S S S S  
ERR2517469 S S S S  
ERR2517470 S S S S  
ERR2517471 S S S S  
ERR2517472 S S S S  
ERR2517473 S S S S

Supplementary I

ERR2517474 S S S S  
ERR2517475 S S S S  
ERR2517476 S S S S  
ERR2517477 S S S S  
ERR2517478 S S S S  
ERR2517479 S S S S  
ERR2517480 S S S S  
ERR2517481 S S S S  
ERR2517482 S S S S  
ERR2517483 S S S S  
ERR2517484 U R S S  
ERR2517485 S S S S  
ERR2517486 R S S S  
ERR2517487 S S S S  
ERR2517488 S S S S  
ERR2517489 S S S S  
ERR2517490 S S S S  
ERR2517491 S S S S  
ERR2517492 S S S S  
ERR2517493 S S S S  
ERR2517494 S S S S  
ERR2517495 S S S R  
ERR2517496 S S S S  
ERR2517497 R S S S  
ERR2517498 S S S S  
ERR2517499 S S S S  
ERR2517500 S S S S  
ERR2517501 S S S U  
ERR2517502 S S S S  
ERR2517503 S S S S  
ERR2517504 S S S S  
ERR2517505 S S S S  
ERR2517506 S S S S  
ERR2517507 S S S S  
ERR2517508 S S S S  
ERR2517509 S S S S  
ERR2517510 S S S S  
ERR2517511 S S S S  
ERR2517512 S S S S  
ERR2517513 S S S S  
ERR2517514 S S S S  
ERR2517515 S S S U  
ERR2517516 S S S S  
ERR2517517 S S S S  
ERR2517518 S S S R  
ERR2517519 S S S S  
ERR2517520 S S S S  
ERR2517521 S S S S  
ERR2517522 S S S S  
ERR2517523 S S S R  
ERR2517524 S S S S  
ERR2517525 S S S S  
ERR2517526 S S S S

Supplementary I

ERR2517527 S S S S  
ERR2517528 S S S S  
ERR2517529 S S S S  
ERR2517530 S S S S  
ERR2517531 S S S S  
ERR2517532 S S S S  
ERR2517533 S S S S  
ERR2517534 S S S S  
ERR2517535 S S S S  
ERR2517536 S S S S  
ERR2517537 S S S S  
ERR2517538 S S S S  
ERR2517539 S S S S  
ERR2517540 S S S S  
ERR2517541 S S S S  
ERR2517542 S S S S  
ERR2517543 S S S S  
ERR2517544 S S S S  
ERR2517545 S S S S  
ERR2517546 S S S S  
ERR2517547 U R R S  
ERR2517548 R R U R  
ERR2517549 S S S S  
ERR2517550 S S S S  
ERR2517551 S S S S  
ERR2517552 S S S S  
ERR2517553 S S S S  
ERR2517554 S S S S  
ERR2517555 S S S S  
ERR2517556 S S S S  
ERR2517557 S S S S  
ERR2517558 S S S S  
ERR2517559 S S S S  
ERR2517560 S S S U  
ERR2517561 S S S S  
ERR2517562 S S S S  
ERR2517563 S S S U  
ERR2517564 S S S S  
ERR2517565 S S S S  
ERR2517566 S S S S  
ERR2517567 U S S U  
ERR2517568 S S S S  
ERR2517569 R R U R  
ERR2517570 S S S S  
ERR2517571 S S S S  
ERR2517572 S S S U  
ERR2517573 S S S S  
ERR2517574 S S S S  
ERR2517575 S S S S  
ERR2517576 S S S S  
ERR2517577 S S S S  
ERR2517578 S S S S  
ERR2517579 S S S S

Supplementary I

ERR2517580 S S S S  
ERR2517581 S S S S  
ERR2517582 S S S S  
ERR2517583 S S S S  
ERR2517584 S S S S  
ERR2517585 S S S S  
ERR2517586 S S S S  
ERR2517587 S S S S  
ERR2517588 S S S S  
ERR2517589 S S S S  
ERR2517590 S S S S  
ERR2517591 S S S S  
ERR2517592 S S S S  
ERR2517593 S S S U  
ERR2517594 S S S S  
ERR2517595 S S S S  
ERR2517596 S S S U  
ERR2517597 S S S S  
ERR2517598 S S S S  
ERR2517599 S S S S  
ERR2517600 S S S S  
ERR2517601 S S S S  
ERR2517602 S S S U  
ERR2517603 S S S S  
ERR2517604 S S S S  
ERR2517605 S S S S  
ERR2517606 S S S S  
ERR2517607 S S S S  
ERR2517608 S S S U  
ERR2517609 S S S S  
ERR2517610 S S S S  
ERR2517611 S S S S  
ERR2517612 S S S S  
ERR2517613 S S S S  
ERR2517614 S S S S  
ERR2517615 S S S S  
ERR2517616 S S S R  
ERR2517617 S S S R  
ERR2517618 S S S S  
ERR2517619 S S S S  
ERR2517620 S S S S  
ERR2517621 S S S S  
ERR2517622 S S S S  
ERR2517623 R S S S  
ERR2517624 U S S S  
ERR2517625 S S S S  
ERR2517626 S S S S  
ERR2517627 S S S U  
ERR2517628 S S S S  
ERR2517629 S S S S  
ERR2517630 S S S S  
ERR2517631 S S S S  
ERR2517632 R U S S

Supplementary I

ERR2517633 S S S S  
ERR2517634 S S S S  
ERR2517635 S S S S  
ERR2517636 S S S S  
ERR2517637 S S S S  
ERR2517638 S S S S  
ERR2517639 S S S S  
ERR2517640 S S S S  
ERR2517641 S S S S  
ERR2517642 S S S S  
ERR2517643 S S S S  
ERR2517644 S S S S  
ERR2517645 S S S S  
ERR2517646 S S S S  
ERR2517647 S S S S  
ERR2517648 R S S S  
ERR2517649 S S S U  
ERR2517650 S S S S  
ERR2517651 S S S S  
ERR2517652 S S S S  
ERR2517653 S S S S  
ERR2516537 R R R S  
ERR2516670 R R S S  
ERR2516594 R R S S  
ERR2516609 R R S S  
ERR2516419 R R S S  
ERR2516622 R R S S  
ERR2516454 R R S U  
ERR2516726 R R S U  
ERR2516626 R R R U  
ERR2516575 R R R U  
ERR2516617 R R S U  
ERR2516435 R R R U  
ERR2516684 R R R U  
ERR2516449 R R R S  
ERR2516674 R R S S  
ERR2516484 R R S S  
ERR2516550 R R S U  
ERR2516495 R R R R  
ERR2516542 R R S S  
ERR2516735 R R S S  
ERR2516498 R R S S  
ERR2516561 R R S S  
ERR2516574 R R S S  
ERR2516580 R R S U  
ERR2516475 R R S S  
ERR2516468 R R R S  
ERR2516416 R R R U  
ERR2516720 R R R U  
ERR2516651 R R S U  
ERR2516584 R R R S  
ERR2516411 R R R S  
ERR2516536 R R R S

Supplementary I

ERR2516601 R R S S  
ERR2516474 R R R S  
ERR2516522 R R R R  
ERR2516680 R R S S  
ERR2516583 R R R R  
ERR2516582 R R R U  
ERR2516715 R R R S  
ERR2516642 R R S S  
ERR2516442 R R R S  
ERR2516714 R R R S  
ERR2516700 R R S S  
ERR2516634 R R S S  
ERR2516657 R R R S  
ERR2516545 R R R R  
ERR2516403 R R R S  
ERR2516426 R R S S  
ERR2516629 R R S S  
ERR2516535 R R S S  
ERR2516577 R R S S  
ERR2516711 R R S S  
ERR2516473 R R R R  
ERR2516421 R R S S  
ERR2516510 R R S U  
ERR2516661 R R S S  
ERR2516718 R R S S  
ERR2516516 R R S U  
ERR2516539 R R R S  
ERR2516643 R R S S  
ERR2516606 R R S U  
ERR2516596 R R R R  
ERR2516423 R R S S  
ERR2516627 R R R S  
ERR2516676 R R R S  
ERR2516703 R R R S  
ERR2516524 R R R R  
ERR2516719 R R R U  
ERR2516549 R R R S  
ERR2516586 R R S S  
ERR2516604 R R S S  
ERR2516621 R R R U  
ERR2516417 R R R R  
ERR2516655 R R S S  
ERR2516459 R R R R  
ERR2516736 R R U U  
ERR2516438 R R U U  
ERR2516652 R R U U  
ERR2516563 R R U U  
ERR2516659 R R U U  
ERR2516725 S S U U  
ERR2516466 R R S U  
ERR2516489 R R S S  
ERR2516521 R R R U  
ERR2516633 R R R U

Supplementary I

ERR2516401 R R S U  
ERR2516406 R R S U  
ERR2516613 R R S U  
ERR2516415 R R S U  
ERR2516579 R R R U  
ERR2516571 R R R U  
ERR2516689 R R R S  
ERR2516555 R R R U  
ERR2516569 R R S U  
ERR2516453 R R R U  
ERR2516553 R R S U  
ERR2516444 R R S U  
ERR2516640 R R S U  
ERR2516679 R R S U  
ERR2516566 R R S S  
ERR2516470 R R S U  
ERR2516556 R R S S  
ERR2516402 R R S U  
ERR2516432 R R R U  
ERR2516506 R R R S  
ERR2516671 R R S R  
ERR2516461 R R S S  
ERR2516694 R R R S  
ERR2516567 R R S S  
ERR2516712 R R R U  
ERR2516603 R R S S  
ERR2516695 R R S S  
ERR2516519 R R S S  
ERR2516471 R R S U  
ERR2516445 R R S S  
ERR2516638 R R S R  
ERR2516448 R R S S  
ERR2516477 R R S R  
ERR2516729 R R R S  
ERR2516607 R R R R  
ERR2516562 R R R S  
ERR2516494 R R S R  
ERR2516588 R R R U  
ERR2516672 R R S S  
ERR2516660 R R R R  
ERR2516692 R R S S  
ERR2516641 R R S R  
ERR2516447 R R R R  
ERR2516730 R R R R  
ERR2516593 R R R R  
ERR2516407 R R S R  
ERR2516413 R R R S  
ERR2516656 R R S R  
ERR2516653 R R R S  
ERR2516439 R R R U  
ERR2516410 R R S S  
ERR2516722 R R R S  
ERR2516551 R R S S



Supplementary I

ERR2516505 R R S S  
 ERR2515445 R R S R  
 ERR2515745 R R S S  
 ERR2515961 S S S S  
 ERR2515674 S R S S  
 ERR2515329 S R S S  
 ERR2515382 S R S S  
 ERR2515645 S R S S  
 ERR2515663 R R S S  
 SAMN03648581 S S S S  
 ERR2515697 S R S S  
 ERR2509678 S S S S  
 ERR2509679 S S S S  
 ERR2509676 S S S S  
 ERR2515777 R R R R  
 ERR2515369 S R S S  
 ERR2515686 S R S S  
 ERR2515936 R R R S  
 ERR2515648 R R R S  
 ERR2515732 S R S U  
 ERR2515155 R R S S  
 ERR2515506 R R S R  
 ERR2515266 S R S S  
 ERR2515348 R R R S  
 ERR2515982 R R R R  
 ERR2515497 S S S S  
 SAMN03648582 S S S S  
 SAMN03648583 S S S S  
 ERR2515384 R R S S  
 ERR2515407 R R S R  
 ERR2515131 R R R R  
 ERR2515917 R R R S  
 ERR2516003 R R S S  
 ERR2515962 R R R S  
 ERR2515119 S R S S  
 ERR2515643 R R R R  
 ERR2515851 R R S S  
 ERR2515552 R R S R  
 ERR2516067 R R R S  
 ERR2515342 R R R R  
 ERR2515815 S S S S  
 ERR2515211 S S S S  
 ERR2515856 S R S S  
 ERR2515542 R R R R  
 ERR2515311 S S S S  
 ERR2515970 S S S S  
 ERR2515859 R R S S  
 SAMN03648584 S S S S  
 SAMN03648585 S S S S  
 SAMN03648586 S S S S  
 ERR2515376 R R R S  
 ERR2515223 S R S U  
 ERR2515498 S R S S

Supplementary I

ERR2515224 R R S S  
ERR2515225 R R S S  
ERR2515666 R R S S  
ERR2515868 R R S S  
ERR2515670 S R S S  
ERR2515277 S R S S  
ERR2515801 R R S S  
ERR2515231 S R S S  
ERR2515347 R R S S  
ERR2515258 R R S S  
ERR2515948 R R R R  
SAMN03648587 S S S S  
SAMN03648588 S S S S  
SAMN03648589 R S S S  
SAMN03648590 S S S S  
SAMN03648591 R R S R  
ERR2515442 S R S S  
ERR2515791 S S S S  
SRR6367399 PRJNA393378 R R R R  
SRR5817475 PRJNA393378 R R S S  
SRR6339662 PRJNA393378 R R S S  
SRR6339642 PRJNA393378 R R R R  
SRR6367401 PRJNA393378 R R R R  
SRR5817464 PRJNA393378 R R R R  
SRR2333215 PRJNA270697<sub>T</sub>á R R S R  
SRR5817469 PRJNA393378 R R R R  
SRR6339643 PRJNA393378 R R R R  
SRR5817467 PRJNA393378 R R S S  
SRR5817471 PRJNA393378 R R S R  
SRR5817478 PRJNA393378 R R S R  
SRR6339640 PRJNA393378 R R S R  
SRR6367396 PRJNA393378 R R S S  
SRR6339641 PRJNA393378 R R S S  
SRR5817479 PRJNA393378 R R S R  
SRR6339637 PRJNA393378 R R S S  
SRR6339648 PRJNA393378 R R S S  
SRR6339651 PRJNA393378 R R R S  
SRR6339645 PRJNA393378 R R S S  
SRR6339653 PRJNA393378 R R R R  
SRR6369876 PRJNA393378 R R S R  
SRR6339661 PRJNA393378 R R S S  
SRR6339667 PRJNA393378 R S R S  
SRR5817481 PRJNA393378 R R R S  
SRR5817480 PRJNA393378 R R S S  
SRR5817470 PRJNA393378 R R R R  
SRR6339649 PRJNA393378 R R R S  
SRR5817466 PRJNA393378 R R R R  
SRR6339664 PRJNA393378 R R S S  
SRR5817473 PRJNA393378 R R S R  
SRR5817472 PRJNA393378 R R R R  
SRR6369875 PRJNA393378 R R S R  
SRR6367398 PRJNA393378 R R S R  
SRR6339665 PRJNA393378 R S S R

Supplementary I

SRR2328057 PRJNA270697\_Tá R S S R  
 SRR6369877 PRJNA393378 R S R S  
 SRR6367400 PRJNA393378 R R R S  
 SRR6369878 PRJNA393378 R R S R  
 SRR5817463 PRJNA393378 R R S S  
 SRR6339666 PRJNA393378 R R S R  
 SRR6339644 PRJNA393378 R R R R  
 SRR6367395 PRJNA393378 S S S S  
 SRR6339663 PRJNA393378 S S S S  
 ERR2509673 S S S S  
 ERR2509893 S S S S  
 SAMN03648592 S S S S  
 SAMN03648593 S S S S  
 SAMN03648594 S S S S  
 SAMN03648595 S S S S  
 SAMN03648596 R S S S  
 SAMN03648597 S S S S  
 SAMN03648598 R S S R  
 ERR2515523 R R S S  
 SAMN03648599 S S S S  
 SAMN03648600 S S S S  
 SAMN03648601 S S S S  
 SAMN03648602 S U S U  
 SAMN03648603 S S S S  
 SAMN03648604 S S S R  
 SAMN03648605 S S S S  
 SAMN03648606 S S S S  
 SAMN03648607 R R R S  
 SAMN03648608 S S S S  
 SAMN03648609 S S S S  
 SAMN03648610 S S S S  
 SAMN03648611 S S S S  
 SAMN03648612 S S S S  
 SAMN03648613 S R R S  
 SAMN03648614 S S S S  
 SAMN03648615 R S S S  
 SAMN03648616 S S S S  
 SAMN03648617 S S S S  
 SAMN03648618 S S S S  
 SAMN03648619 S S S S  
 SAMN03648620 S R S S  
 SAMN03648621 S S S S  
 SAMN03648622 S S S S  
 SAMN03648623 S S S U  
 SAMN03648624 S S S S  
 SAMN03648625 S U S U  
 SAMN03648626 S U S U  
 SAMN03648627 S S S S  
 SAMN03648628 S S S S  
 SAMN03648629 S S S S  
 SAMN03648630 S U S U  
 SAMN03648631 R R R R  
 SAMN03648632 S S S S

Supplementary I

SAMN03648633 S U S U  
SAMN03648634 S S S S  
SAMN03648635 S S S S  
SAMN03648636 S S S U  
SAMN03648637 S U S U  
SAMN03648638 S S S S  
SAMN03648639 R S S S  
SAMN03648640 S S S S  
SAMN03648641 S S S S  
SAMN03648642 S U S U  
SAMN03648643 S S S S  
SAMN03648644 S S S S  
SAMN03648645 S S S S  
SAMN03648646 S S S S  
SAMN03648647 S S S S  
SAMN03648648 S S S S  
SAMN03648649 S S S S  
SAMN03648650 S U S U  
SAMN03648651 S S S S  
SAMN03648652 R R S S  
SAMN03648653 S S S S  
SAMN03648654 S S S U  
SAMN03648655 S S S S  
SAMN03648656 S S S S  
SAMN03648657 S S S S  
SAMN03648658 S U S U  
SAMN03648659 R U S U  
SAMN03648660 S U S U  
SAMN03648661 S S S S  
SAMN03648662 R S S S  
SAMN03648663 S U U U  
SAMN03648664 S U S U  
SAMN03648665 S S S S  
SAMN03648666 S S S S  
SAMN03648667 S U S U  
SAMN03648668 S S S S  
SAMN03648669 S S S S  
SAMN03648670 S S S S  
SAMN03648671 S S S U  
SAMN03648672 S S S S  
SAMN03648673 S U S U  
SAMN03648674 S R S S  
SAMN03648675 S S S S  
SAMN03648676 S S S S  
SAMN03648677 S U U U  
SAMN03648678 S S S S  
SAMN03648679 S S S S  
SAMN03648680 S S S S  
ERR2515209 R R S S  
SAMN03648681 S S S S  
SAMN03648682 S S S S  
SAMN03648683 S S S S  
SAMN03648684 S S S S

Supplementary I

SAMN03648685 S S S U  
SAMN03648686 S S S S  
SAMN03648687 S S S S  
SAMN03648688 S S S S  
SAMN03648689 S S S S  
SAMN03648690 R S S S  
SAMN03648691 S S S S  
SAMN03648692 S S S S  
SAMN03648693 S S S S  
SAMN03648694 S S S S  
SAMN03648695 S S S S  
SAMN03648696 S S S S  
SAMN03648697 S S S S  
SAMN03648698 S S S U  
SAMN03648699 S U S U  
SAMN03648700 S S S S  
SAMN03648701 R S S U  
SAMN03648702 S S S S  
SAMN03648703 S S S S  
SAMN03648704 S S S R  
SAMN03648705 S S S S  
SAMN03648706 S S S S  
SAMN03648707 S R S S  
SAMN03648708 S S S S  
SAMN03648709 S S S S  
SAMN03648710 S S S S  
SAMN03648711 S S S S  
SAMN03648712 S S S S  
SAMN03648713 S S S S  
SAMN03648714 R S R R  
SAMN03648715 S S S S  
SAMN03648716 R S S S  
SAMN03648717 R R S S  
SAMN03648718 S S S S  
SAMN03648719 S S S S  
SAMN03648720 S U S U  
SAMN03648721 S S S S  
SAMN03648722 S S S S  
SAMN03648723 S S S S  
SAMN03648724 S S S S  
SAMN03648725 S S S S  
SAMN03648726 S S S S  
ERR2515573 R R R S  
SAMN03648727 S S S S  
SAMN03648728 S S S S  
SAMN03648729 R R R R  
ERR2515301 R R S R  
SAMN03648730 S S S S  
SAMN03648731 S S S S  
SAMN03648732 S S S S  
SAMN03648733 S S S S  
SAMN03648734 S S S S  
ERR2516025 R R R R

Supplementary I

ERR2515623 S R S S  
SAMN03648735 S S S S  
SAMN03648736 S S S S  
SAMN03648737 S S S S  
SAMN03648738 S S S S  
SAMN03648739 S S S S  
SAMN03648740 R S S R  
SAMN03648741 S S S S  
SAMN03648742 S R S S  
SAMN03648743 S S S S  
SAMN03648744 S S S S  
SAMN03648745 S S S S  
SAMN03648746 S U S U  
SAMN03648747 S S S S  
SAMN03648748 S S S S  
SAMN03648749 S S S S  
SAMN03648750 S S S S  
SAMN03648751 S S S S  
SAMN03648752 R R S S  
SAMN03648753 S S S U  
SAMN03648754 S S S S  
SAMN03648755 S S S S  
SAMN03648756 S S S S  
SAMN03648757 S S S S  
SAMN03648758 S S S R  
SAMN03648759 S S S S  
SAMN03648760 S S S S  
SAMN03648761 S U S U  
SAMN03648762 S S S S  
SAMN03648763 R S S S  
SAMN03648764 S S S S  
SAMN03648765 S S S S  
SAMN03648766 R S S R  
SAMN03648767 S S S S  
SAMN03648768 S S S S  
SAMN03648769 S S S S  
SAMN03648770 S S S S  
SAMN03648771 S S S R  
SAMN03648772 S S S S  
SAMN03648773 S S S S  
SAMN03648774 S S S S  
SAMN03648775 S S S S  
SAMN03648776 S S S S  
SAMN03648777 R S S S  
SAMN03648778 S S S S  
SAMN03648779 S S S S  
SAMN03648780 S S S S  
SAMN03648781 S S S S  
SAMN03648782 S U S U  
SAMN03648783 S S S U  
SAMN03648784 S S S S  
SAMN03648785 S S S S  
SAMN03648786 R S R R

Supplementary I

SAMN03648787 S S S S  
SAMN03648788 R S S S  
SAMN03648789 S S S S  
SAMN03648790 S U U U  
SAMN03648791 S S S S  
SAMN03648792 S S S S  
SAMN03648793 S S S U  
SAMN03648794 S S S S  
SAMN03648795 S S S S  
SAMN03648796 S S S U  
SAMN03648797 S S S S  
SAMN03648798 S U S U  
SAMN03648799 S S S S  
SAMN03648800 S S S S  
SAMN03648801 S S S S  
SAMN03648802 R R S R  
SAMN03648803 S S S S  
ERR2515995 R R R R  
SAMN03648804 S S S S  
SAMN03648805 S U S U  
SAMN03648806 S S S S  
SAMN03648807 S S S S  
SAMN03648808 S S S S  
SAMN03648809 S R S S  
SAMN03648810 S U S U  
SAMN03648811 S U U U  
SAMN03648812 S S S S  
SAMN03648813 S U S U  
SAMN03648814 S S S S  
SAMN03648815 S S S S  
SAMN03648816 S S S S  
SAMN03648817 S S S S  
SAMN03648818 S S S S  
SAMN03648819 S R S S  
SAMN03648820 S U S U  
SAMN03648821 R R R R  
SAMN03648822 S S S S  
SAMN03648823 S S S S  
SAMN03648824 S S S S  
SAMN03648825 S S S S  
SAMN03648826 R S S S  
SAMN03648827 S S S U  
SAMN03648828 S S S R  
SAMN03648829 S S S U  
SAMN03648830 S S S S  
SAMN03648831 S S S S  
SAMN03648832 S S S R  
ERR2515774 S R S S  
SAMN03648833 S U S U  
SAMN03648834 S U S S  
SAMN03648835 S S S S  
ERR2515482 R R S S  
SAMN03648836 S U S U

Supplementary I

SAMN03648837 S R S S  
SAMN03648838 S S S S  
ERR2515283 R R S S  
ERR2515356 S R S R  
SAMN03648839 S S S S  
SAMN03648840 S S S S  
SAMN03648841 S S S S  
SAMN03648842 S R S S  
SAMN03648843 S S S S  
ERR2516090 S R S S  
SAMN03648844 R R R R  
SAMN03648845 R R S R  
ERR2515166 R R S S  
SAMN03648846 S S S S  
SAMN03648847 S S S S  
SAMN03648848 S S S S  
SAMN03648849 S S S S  
SAMN03648850 S S S S  
SAMN03648851 S S S S  
SAMN03648852 R S S S  
SAMN03648853 S S S S  
SAMN03648854 R S S U  
SAMN03648855 S S S S  
ERR2515267 S R S S  
SAMN03648856 S S S S  
SAMN03648857 S S S S  
SAMN03648858 S S S S  
SAMN03648859 S S S S  
SAMN03648860 S S S S  
SAMN03648861 R S S S  
SAMN03648862 S S S S  
SAMN03648863 S S S S  
SAMN03648864 S S S S  
SAMN03648865 S S S S  
SAMN03648866 S S S S  
SAMN03648867 S S S S  
ERR2515463 S R S S  
SAMN03648868 S S S S  
ERR2515246 R R S R  
SAMN03648869 S S S S  
SAMN03648870 S R S S  
SAMN03648871 S S S S  
SAMN03648872 S S S S  
SAMN03648873 S S S S  
SAMN03648874 S S S S  
SAMN03648875 S S S S  
SAMN03648876 R S S S  
SAMN03648877 S S S S  
SAMN03648878 S S S S  
SAMN03648879 S S S S  
SAMN03648880 S S S S  
SAMN03648881 R S S S  
SAMN03648882 R S S S



Supplementary I

SAMN03648883 S S S S  
SAMN03648884 R S S S  
SAMN03648885 S S S S  
SAMN03648886 R S S S  
SAMN03648887 S S S S  
SAMN03648888 S R S S  
SAMN03648889 S S S S  
SAMN03648890 S S S S  
SAMN03648891 S S S S  
SAMN03648892 S S S S  
SAMN03648893 S S S S  
ERR2515703 R S S S  
SAMN03648894 S S S S  
SAMN03648895 S S S S  
SAMN03648896 S S S S  
ERR2515937 R R S S  
SAMN03648897 R S S S  
SAMN03648898 S S S S  
SAMN03648899 S S S S  
ERR2515576 R R S S  
SAMN03648900 R S S S  
SAMN03648901 S S S S  
SAMN03648902 S S S S  
SAMN03648903 S S S R  
SAMN03648904 S S S S  
SAMN03648905 S S S S  
SAMN03648906 S S S S  
SAMN03648907 S S S S  
SAMN03648908 S S S S  
SAMN03648909 S S S S  
SAMN03648910 S S S S  
SAMN03648911 S S S R  
SAMN03648912 S S S S  
SAMN03648913 S S S S  
ERR2515857 S R S S  
SAMN03648914 S S S S  
ERR2515761 R S S S  
SAMN03648915 S S S S  
SAMN03648916 S S S S  
SAMN03648917 S S S S  
SAMN03648918 S S S S  
SAMN03648919 S S S S  
SAMN03648920 S S S S  
ERR2515709 S S S S  
SAMN03648921 S S S S  
SAMN03648922 R R S S  
SAMN03648923 S S S S  
SAMN03648924 S S S S  
SAMN03648925 S S S S  
SAMN03648926 S S S S  
SAMN03648927 R S S S  
SAMN03648928 S S S S  
SAMN03648929 S S S S

Supplementary I

SAMN03648930 R S S S  
SAMN03648931 S S S S  
ERR2515882 S R S S  
ERR2515121 R R S S  
SAMN03648932 S S S S  
SAMN03648933 R S S S  
ERR2515737 R R S S  
SAMN03648934 S S S S  
SAMN03648935 S S S S  
ERR2515890 S R S S  
SAMN03648936 S S S S  
SAMN03648937 R R S S  
SAMN03648938 S S S S  
SAMN03648939 S S S S  
SAMN03648940 S S S S  
SAMN03648941 S S S S  
SAMN03648942 S S S S  
SAMN03648943 S S S S  
SAMN03648944 S S S S  
ERR2515612 R R S R  
SAMN03648945 S S S S  
SAMN03648946 S S S S  
SAMN03648947 S S S S  
SAMN03648948 R S S S  
ERR2515417 S R S S  
SAMN03648949 S S S S  
SAMN03648950 S S S S  
SAMN03648951 S S S S  
SAMN03648952 S S S S  
SAMN03648953 S S S S  
SAMN03648954 S S S S  
SAMN03648955 S R S S  
ERR2515294 R R S R  
SAMN03648956 S S S S  
SAMN03648957 S S S S  
SAMN03648958 S S S S  
SAMN03648959 S S S R  
ERR2515123 R R S S  
SAMN03648960 S S S S  
SAMN03648961 S S S S  
ERR2515371 R R S R  
ERR2515571 S R S S  
SAMN03648962 S S S S  
SAMN03648963 S S S S  
SAMN03648964 S S S S  
SAMN03648965 S S S S  
SAMN03648966 S S S S  
SAMN03648967 S S S S  
SAMN03648968 S S S S  
SAMN03648969 S S S S  
SAMN03648970 S S S S  
SAMN03648971 S S S S  
SAMN03648972 S S S S

Supplementary I

SAMN03648973 S S S S  
SAMN03648974 S S S S  
SAMN03648975 S S S S  
SAMN03648976 S S S S  
SAMN03648977 S S S S  
SAMN03648978 R R S R  
SAMN03648979 S S R S  
ERR2515684 R R R R  
SAMN03648980 S S S R  
SAMN03648981 S S S S  
SAMN03648982 S S S S  
SAMN03648983 S S S S  
SAMN03648984 S S S S  
SAMN03648985 S S S S  
SAMN03648986 S S S S  
ERR2515539 S R S S  
SAMN03648987 S S S S  
SAMN03648988 R S S S  
SAMN03648989 S S S S  
SAMN03648990 R S S S  
SAMN03648991 S S S S  
SAMN03648992 S S S S  
SAMN03648993 S S S S  
SAMN03648994 S S S S  
SAMN03648995 S S S S  
SAMN03648996 S S S S  
SAMN03648997 S S S S  
SAMN03648998 S S S S  
SAMN03648999 S S S S  
SAMN03649000 R R S S  
SAMN03649001 S R S S  
SAMN03649002 S S S S  
SAMN03649003 S S S S  
SAMN03649004 R R R R  
SAMN03649005 S S S S  
SAMN03649006 S S S S  
SAMN03649007 S S S S  
SAMN03649008 R R S U  
SAMN03649009 S S S S  
SAMN03649010 R R S R  
SAMN03649011 S S S S  
SAMN03649012 S S S S  
SAMN03649013 S S S S  
SAMN03649014 S S S S  
SAMN03649015 S S S S  
SAMN03649016 S S S S  
SAMN03649017 S S S S  
SAMN03649018 R S S S  
SAMN03649019 S S S S  
SAMN03649020 S S S S  
SAMN03649021 S S S S  
ERR2515228 R R R R  
SAMN03649022 R R S S

Supplementary I

SAMN03649023 S S S S  
SAMN03649024 S S S S  
SAMN03649025 S S S S  
SAMN03649026 S S S S  
SAMN03649027 S S S S  
SAMN03649028 S S S S  
SAMN03649029 S S S S  
SAMN03649030 S S S S  
SAMN03649031 S S S S  
SAMN03649032 S S S S  
SAMN03649033 S S S S  
SAMN03649034 S S S S  
SAMN03649035 S S S S  
SAMN03649036 S S S S  
SAMN03649037 S S S S  
SAMN03649038 S S S S  
SAMN03649039 S S S S  
SAMN03649040 S S S S  
SAMN03649041 S S S S  
SAMN03649042 S S S S  
SAMN03649043 S S S S  
SAMN03649044 S S S S  
SAMN03649045 R S S S  
SAMN03649046 S S S S  
ERR2515174 S S S S  
SAMN03649047 S S S S  
SAMN03649048 S S S S  
SAMN03649049 S S S S  
ERR2515979 S S S S  
SAMN03649050 S S S S  
ERR2515186 S S S S  
SAMN03649051 S S S S  
SAMN03649052 S S S S  
SAMN03649053 R R R R  
SAMN03649054 S S S S  
SAMN03649055 S S S S  
SAMN03649056 S S S S  
SAMN03649057 S S S S  
SAMN03649058 S S S S  
ERR2515112 R R R R  
ERR2515143 S R S S  
ERR2515983 S R S S  
ERR2515583 R R U R  
SAMN03649059 S S S S  
SAMN03649060 S S S R  
ERR2515389 R R S S  
ERR2515567 R R R R  
ERR2516029 S R S S  
ERR2515304 R R R S  
SAMN03649061 S S S S  
ERR2515362 S R S S  
ERR2516024 R R R S  
ERR2515518 S R S S

Supplementary I

ERR2515396 S R S S  
SAMN03649062 S S S S  
ERR2515559 R R S S  
ERR2515252 R R R R  
SAMN03649063 S S S S  
ERR2515711 R R S S  
ERR2515217 S S S S  
ERR2515488 R R R R  
ERR2516007 S R S S  
ERR2515606 R R S R  
ERR2515345 R R S R  
ERR2516020 R R S S  
ERR2515874 R R S S  
ERR2515963 S S S S  
ERR2515781 S R S S  
ERR2515165 R R R U  
ERR2515664 R R S R  
ERR2516049 R R R U  
ERR2516001 R R S S  
ERR2515978 R R R S  
ERR2515949 R R R S  
ERR2515650 R R R U  
ERR2515390 R R R R  
ERR2516031 R R R R  
ERR2515117 S S S S  
ERR2515360 S S S S  
ERR2515755 S S S S  
ERR2515938 R R S S  
ERR2515903 R R S R  
ERR2515126 S R S S  
ERR2515189 R R S S  
ERR2515565 S R S S  
ERR2515952 R R S R  
ERR2515423 R R S R  
ERR2515218 S R S S  
ERR2516069 R R R R  
ERR2515147 R R S R  
ERR2515682 R R R R  
ERR2515107 S R S S  
ERR2515997 R R R R  
ERR2515934 R R R S  
ERR2515759 R R S R  
ERR2515221 S R S S  
ERR2515178 S R S S  
ERR2515628 S R S S  
ERR2515486 R R R R  
ERR2515310 R R R R  
ERR2515284 R R S R  
ERR2515614 R R R R  
ERR2516004 R R S S  
ERR2515634 R R S S  
ERR2515615 R R S R  
ERR2515724 R R R R

Supplementary I

ERR2516010 R R S S  
ERR2515441 S R S S  
ERR2515249 R R R R  
ERR2515163 R R R R  
ERR2516034 S R S S  
ERR2515346 R R R S  
ERR2515554 R R R R  
ERR2515933 R R R R  
ERR2515705 R R S R  
ERR2515633 R R S S  
ERR2516060 R R S S  
ERR2515350 S R S S  
ERR2515227 R R S R  
ERR2515749 R R R S  
ERR2515530 R R S S  
ERR2515109 R R R S  
ERR2515410 R R R R  
ERR2515915 S R S S  
ERR2515798 R R R R  
ERR2516057 R R R R  
ERR2515210 R R S R  
ERR2516063 U R R U  
ERR2515708 U R S U  
ERR2515182 R R R R  
ERR2515754 U R R U  
ERR2515591 U R R U  
ERR2515213 U R R U  
ERR2515802 U R R U  
ERR2515361 U R R U  
ERR2515990 U R R U  
ERR2515810 U R R U  
ERR2515541 U R R U  
ERR2515358 U R S U  
ERR2515590 U R R U  
ERR2515173 U R R U  
ERR2515864 U R R U  
ERR2515513 U R S U  
ERR2515544 U R R U  
ERR2515920 U R R U  
ERR2515794 U R R U  
ERR2515660 U R R U  
ERR2515996 U R R U  
ERR2515528 U R R U  
ERR2515776 U R R U  
ERR2515833 U R R U  
ERR2515710 U S S U  
ERR2515910 U R R U  
ERR2515546 U R R U  
ERR2516017 U R R U  
ERR2515588 U R R U  
ERR2516005 U R R U  
ERR2515797 U R R U  
ERR2515867 U R R U

Supplementary I

ERR2515658 U R R U  
ERR2515286 U R R U  
ERR2515335 U R S U  
ERR2515839 U R R U  
ERR2515475 U R R U  
ERR2515248 U R S U  
ERR2515667 U R R U  
ERR2515479 U R R U  
ERR2516023 U R R U  
ERR2515135 U R R U  
ERR2515636 U R R U  
ERR2515924 U R R U  
ERR2516045 U R R U  
ERR2515519 U R R U  
ERR2515597 U R R U  
ERR2515826 U R R U  
ERR2516064 U R R U  
ERR2515419 U R R U  
ERR2515199 U R R U  
ERR2515520 U R S U  
ERR2515560 U R R U  
ERR2515965 U R R U  
ERR2515344 U R R U  
ERR2516012 U R R U  
ERR2515756 U R R U  
ERR2516041 U S S U  
ERR2515860 U R S U  
ERR2515159 U R R U  
ERR2515322 U R R U  
ERR2515589 U R R U  
ERR2516055 U R R U  
ERR2515575 S S S U  
ERR2515640 U R R U  
ERR2515739 U R R U  
ERR2515812 U R S U  
ERR2515594 U R R U  
ERR2515609 U R R U  
ERR2515319 U R R U  
ERR2515473 U R R U  
ERR2515898 U R R U  
ERR2515411 U R R U  
ERR2515743 U R R U  
ERR2515331 U R R U  
ERR2515926 U R R U  
ERR2515584 U R R U  
ERR2515806 S S S U  
ERR2515835 U R R U  
ERR2515405 U R R U  
ERR2515725 U R R U  
ERR2516066 U R R U  
ERR2515719 U R R U  
ERR2515386 U R R U  
ERR2515152 U R R U

Supplementary I

ERR2515514 U R R U  
ERR2515747 U R S U  
ERR2516019 U R R U  
ERR2515872 U S R U  
ERR2515425 U R R U  
ERR2515325 U R S U  
ERR2515175 U R R U  
ERR2515789 U R S U  
ERR2515878 U S S U  
ERR2515918 U S S U  
ERR2515415 U S S U  
ERR2515373 U R R U  
ERR2515238 U R R U  
ERR2515971 U R R U  
ERR2515263 U R R U  
ERR2515568 U R R U  
ERR2515735 R R R R  
ERR2515458 U R R U  
ERR2516014 U R R U  
ERR2515133 U R R U  
ERR2516077 U R S U  
ERR2515115 R R R U  
ERR2515911 S R S U  
ERR2515931 R R S U  
ERR2515768 U R R U  
ERR2515250 U R R U  
ERR2515988 U R R U  
ERR2516068 U R R U  
ERR2515144 U R R U  
ERR2515337 U R R U  
ERR2516018 R R R U  
ERR2515153 U R R U  
ERR2515333 U R S U  
ERR2515647 U R S U  
ERR2515354 S R S U  
ERR2515758 R R R R  
ERR2516097 S R S S  
ERR2515448 R R S S  
ERR2515744 S S S S  
ERR2515577 R R R R  
ERR2516091 R R R R  
ERR2515466 R R R R  
ERR2515720 R R S S  
SAMN03649064 S S S S  
ERR2509894 S S S S  
SAMN03649065 S S S S  
SAMN03649066 S S S U  
SAMN03649067 S S S S  
SAMN03649068 S S S S  
ERR2509683 S S S S  
SAMN03649069 S S S S  
ERR2509895 S S S S  
ERR2509685 S S S S



Supplementary I

ERR2509686 S S S S  
ERR2509896 S S S S  
ERR2509897 R R R S  
ERR2509879 S S S S  
SAMN03649070 S S S S  
SAMN03649071 S S S S  
ERR2515909 S S S S  
SAMN03649072 S S S S  
SAMN03649073 S S S S  
SAMN03649074 S S S S  
SAMN03649075 S S S S
