# Supplementary material for: Multi-Label Random Forest Model for Tuberculosis Drug Resistance Classification and Mutation Ranking
Source: PubMed Central journal article supplement (PMC7188832; doi:10.3389/fmicb.2020.00667), 2020-04-22
Supplement: Data_Sheet_2.pdf [file Data_Sheet_2.pdf]

# Multi-Label Random Forest Model for Tuberculosis Drug Resistance Classification and Mutation Ranking

## SUPPLEMENTARY A

These 23 genes were previously identified to be associated with resistance of examined anti-TB drugs in the literature. The purpose of selecting these 23 genes is to make our results comparable with the baseline model, direct association. The next step as the future work will be to analyse the whole genome sequences including positions outside these genes. Including all genetic variants will increase the feature space to 200k-300k. RF models usually cannot deal with very high dimensional data in presence of dependencies as in the TB data.

**Table S1.** A list of 23 candidate genes and their associated drugs.

| Genes                                          | Relevant drug |
|------------------------------------------------|---------------|
| ahpC, fabG1, inhA, katG, ndh                   | INH           |
| rpoB                                           | RIF           |
| embA, embB, embC, embR, iniA, iniC, manB, rmlD | EMB           |
| pncA, rpsA                                     | PZA           |
| gyrA, gyrB                                     | OFX, MOX, CIP |
| rpsL, gidB, rrs, tlyA                          | SM            |
| gidB, rrs, tlyA                                | AK and CAP    |
| gidB, rrs, tlyA, eis                           | KAN           |

## SUPPLEMENTARY B

In each node of Figure S1, value has four rows indicating the resistant/susceptible numbers for EMB, INH, RIF and PZA respectively while it only has one row in Figure S2, showing the resistant/susceptible split for EMB.

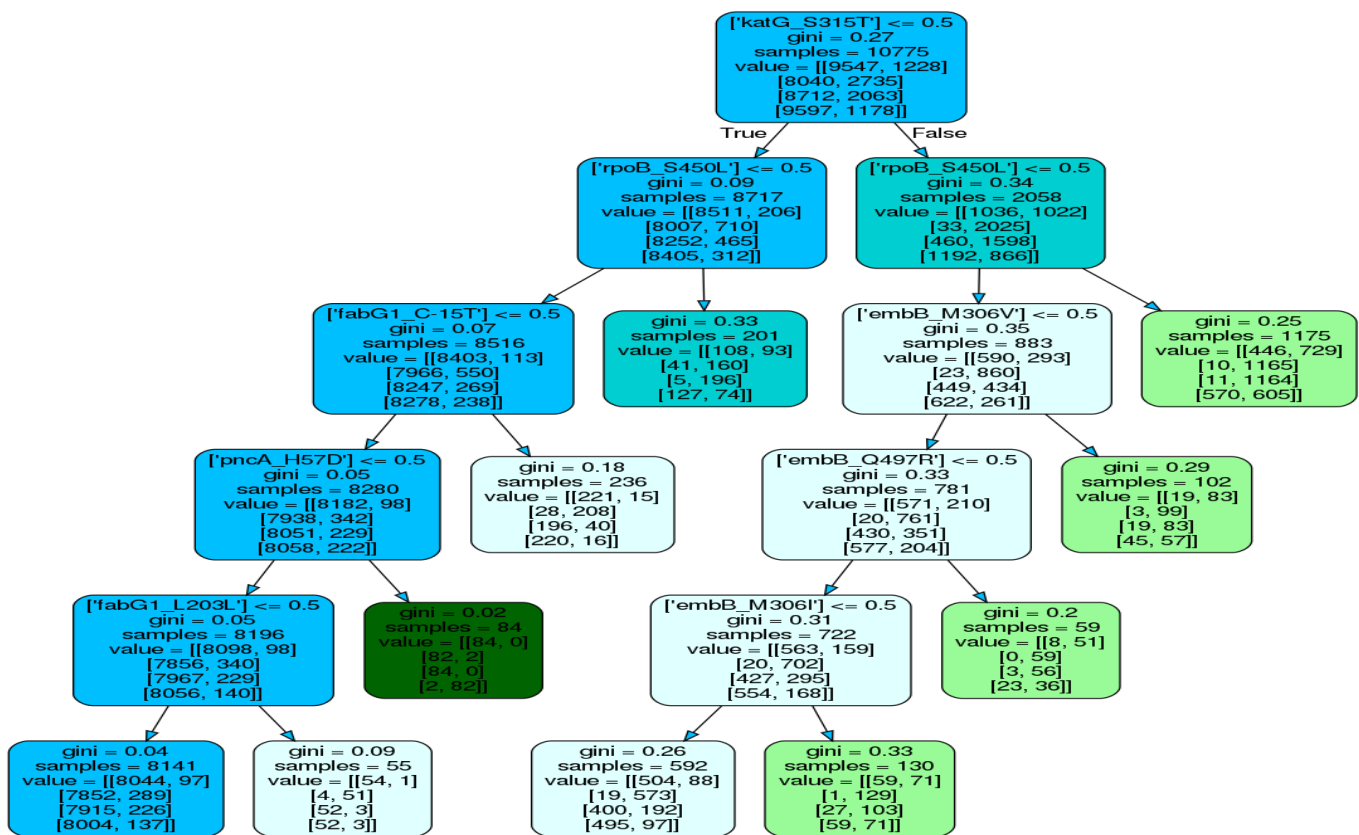

**Figure S1.** A decision tree from the forest trained considering MLRF + F3. Only 10 leaf nodes presented here. sample means the total number of isolates meeting the criteria indicated at each node and value denotes the size of two classes at this node. For example, samples = 883 with a value of  $[\{590, 293\}, \dots]$  associated to *embB\_M306V* shows that from the total 883 samples, 590 are susceptible and 293 are resistant to EMB. value has four rows indicating the resistant/susceptible numbers for EMB, INH, RIF and PZA, respectively.

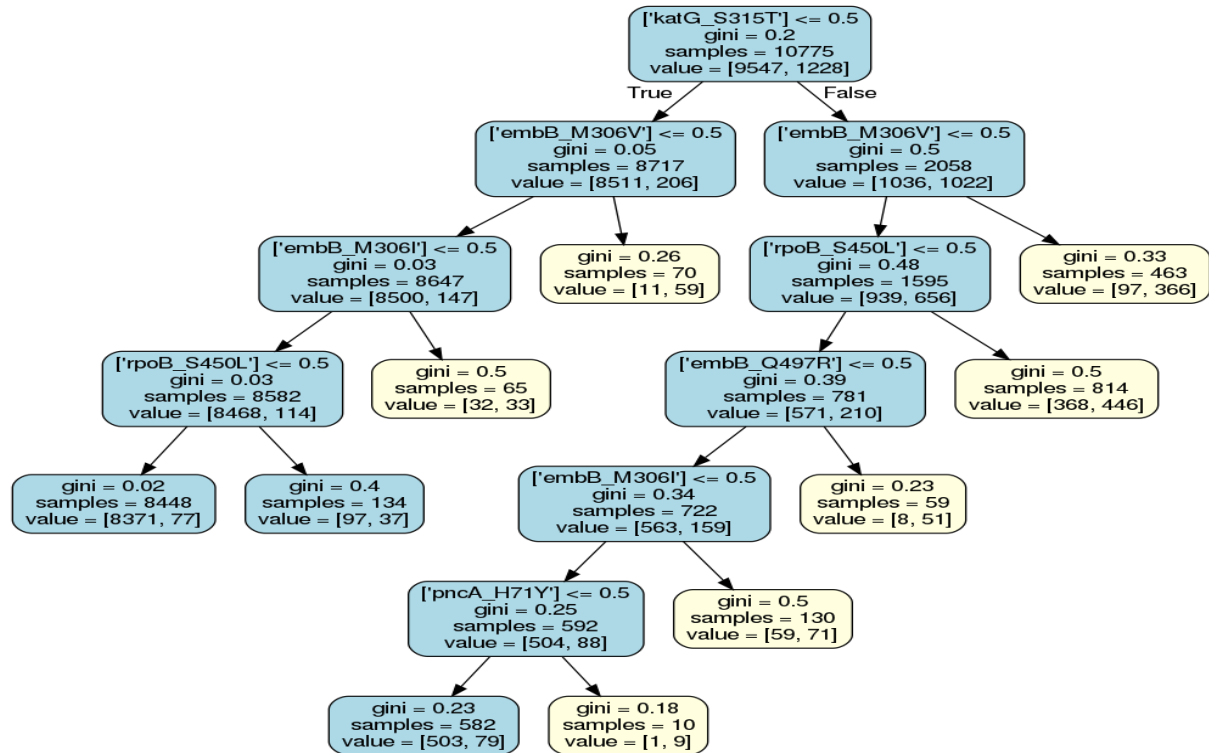

**Figure S2.** A decision tree from the forest trained considering SLRF + F3 for EMB prediction. Only 10 leaf nodes presented here.

## SUPPLEMENTARY C

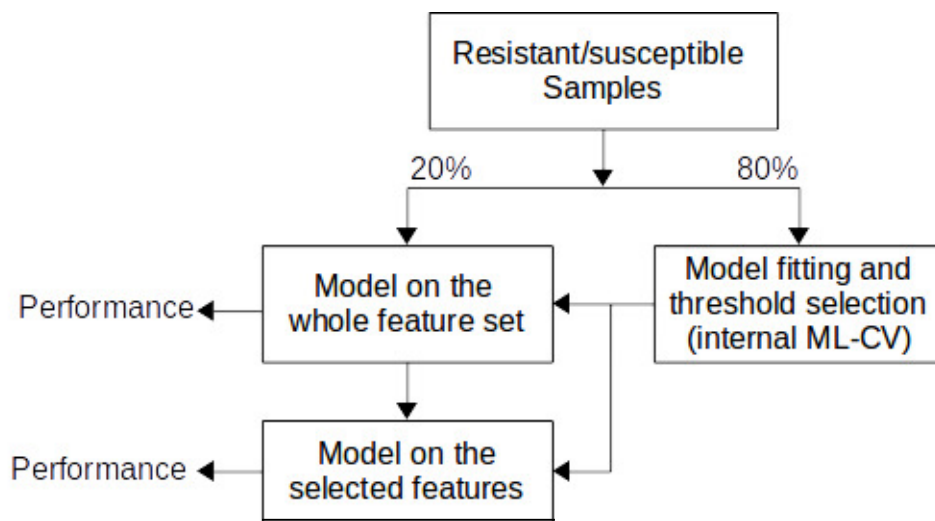

**Figure S3.** Flowchart for testing MLRF and SLRF classifiers. In each iteration, 20% of the dataset was used as the test set and the remaining 80% of the data as the training set. The models were trained: (1) on the whole feature space; and (2) most highly-ranked features.

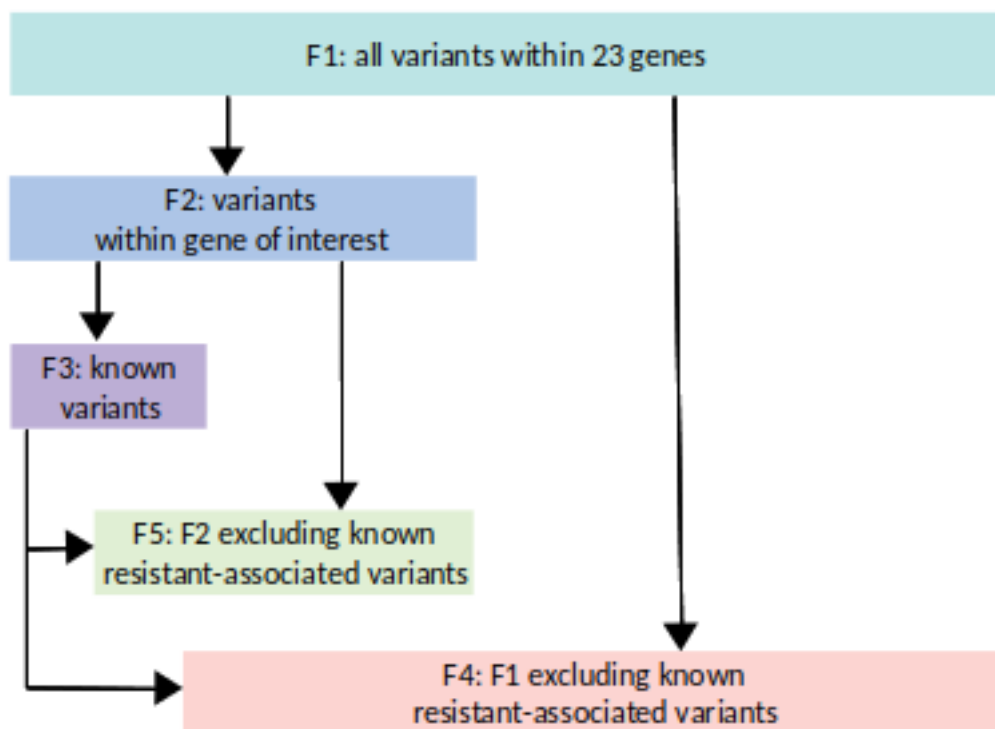

**Figure S4.** Five feature sets were considered: [F1] the baseline feature space of all variants found within 23 candidate genes ( $N = 5918$ ); [F2] as a subset of F1 includes only drug-associated genes for a particular drug ( $N = 3366$  Supplementary B); [F3] known variants for all first-line drugs ( $N = 1874$ ); [F4] and [F5] are obtained by dropping isolates with any known resistance-associated mutations from F1 and F2 respectively – that is, F4 and F5 allows us to investigate whether phenotypically resistant isolates without well-known resistance mutations can be identified from other sequence variations ( $N = 4755$  and  $2417$ , respectively).

**Table S2.** The phenotype profile for first-line drugs; the number of isolates that are resistant or susceptible. All missing labels were removed from our analysis.

| Drug        | INH  | EMB  | RIF  | PZA  |
|-------------|------|------|------|------|
| Resistant   | 2735 | 1228 | 2063 | 1178 |
| Susceptible | 8040 | 9547 | 8712 | 9597 |

**Table S3.** The phenotype profile for second-line drugs; the number of isolates that are resistant, susceptible, or missing.

| Drug         | SM   | KAN   | AK    | CAP   | CIP   | OFX   | MOX   |
|--------------|------|-------|-------|-------|-------|-------|-------|
| Susceptible  | 5105 | 1925  | 2690  | 2741  | 529   | 2618  | 1249  |
| Resistant    | 1729 | 242   | 273   | 315   | 77    | 458   | 262   |
| Total tested | 6834 | 2167  | 2963  | 3056  | 606   | 3076  | 1511  |
| Missing      | 6568 | 11235 | 10439 | 10346 | 12796 | 10326 | 11891 |

**Table S4.** Frequency (%) of each label combination; susceptibility (S) or Resistance (R) to PZA, EMB, RIF, and INH, respectively.

| Phenotypes | Frequency |
|------------|-----------|
| SSSS       | 69.85     |
| SSSR       | 6.02      |
| SSRS       | 1.23      |
| SSRR       | 6.73      |
| SRSS       | 0.20      |
| SRSR       | 0.31      |
| SRRS       | 0.74      |
| SRRR       | 5.65      |
| RSSS       | 1.11      |
| RSSR       | 0.32      |
| RSRS       | 0.06      |
| RSRR       | 2.29      |
| RRSS       | 0.01      |
| RRSR       | 0.20      |
| RRRS       | 0.01      |
| RRRR       | 5.23      |

## SUPPLEMENTARY D

Table S5. Comparing the performance of DA, MLRF and SLRF for INH, EMB, RIF, PZA, MDR-TB, and FDR-TB for feature sets F1-F5.

| Feature set | Method | INH          |              |                     | EMB          |              |                     |
|-------------|--------|--------------|--------------|---------------------|--------------|--------------|---------------------|
|             |        | Sensitivity  | Specificity  | AUC                 | Sensitivity  | Specificity  | AUC                 |
|             | DA     | 91.15 ± 1.19 | 98.96 ± 0.25 | 95.05 ± 0.60        | 85.10 ± 1.79 | 94.91 ± 0.38 | 90.00 ± 0.97        |
| F1          | MLRF   | 94.29 ± 0.74 | 94.32 ± 1.58 | 94.30 ± 0.80        | 91.75 ± 1.81 | 91.58 ± 0.77 | <b>91.70 ± 0.75</b> |
|             | SLRF   | 94.48 ± 0.89 | 94.14 ± 1.40 | 94.31 ± 0.59        | 91.76 ± 2.45 | 91.65 ± 0.92 | 91.70 ± 1.04        |
| F2          | MLRF   | 93.76 ± 0.78 | 95.36 ± 0.54 | 94.56 ± 0.47        | 91.16 ± 1.65 | 91.72 ± 0.48 | 91.44 ± 0.81        |
|             | SLRF   | 93.65 ± 0.93 | 95.39 ± 0.54 | 94.52 ± 0.53        | 91.51 ± 1.92 | 91.84 ± 0.63 | 91.67 ± 0.91        |
| F3          | MLRF   | 93.76 ± 0.80 | 97.79 ± 0.35 | <b>96.01 ± 0.47</b> | 90.72 ± 1.49 | 92.50 ± 0.39 | 91.61 ± 0.75        |
|             | SLRF   | 93.19 ± 1.03 | 97.80 ± 0.36 | 95.49 ± 0.50        | 90.91 ± 1.53 | 92.52 ± 0.38 | <b>91.70 ± 0.75</b> |
| F4          | MLRF   | 15.87 ± 5.82 | 97.44 ± 0.83 | 56.65 ± 2.85        | 3.50 ± 5.73  | 99.39 ± 0.36 | 51.44 ± 2.85        |
|             | SLRF   | 15.49 ± 5.81 | 97.29 ± 0.80 | 56.39 ± 2.79        | 3.49 ± 5.23  | 99.44 ± 0.30 | 51.47 ± 2.59        |
| F5          | MLRF   | 12.72 ± 4.64 | 98.19 ± 0.42 | 55.45 ± 2.27        | 2.62 ± 4.43  | 99.70 ± 0.19 | 51.16 ± 2.21        |
|             | SLRF   | 13.19 ± 5.93 | 98.17 ± 0.58 | 55.68 ± 2.99        | 3.19 ± 5.09  | 99.68 ± 0.20 | 51.43 ± 2.53        |
| Feature set | Method | RIF          |              |                     | PZA          |              |                     |
|             |        | Sensitivity  | Specificity  | AUC                 | Sensitivity  | Specificity  | AUC                 |
|             | DA     | 91.52 ± 1.34 | 98.68 ± 0.21 | 95.10 ± 0.65        | 43.21 ± 2.72 | 98.58 ± 0.23 | 70.89 ± 1.35        |
| F1          | MLRF   | 93.88 ± 1.26 | 94.25 ± 1.38 | 94.07 ± 0.75        | 86.86 ± 1.98 | 90.44 ± 0.73 | 88.65 ± 1.08        |
|             | SLRF   | 93.93 ± 1.27 | 93.74 ± 1.23 | 93.84 ± 0.56        | 87.27 ± 1.74 | 90.71 ± 0.72 | <b>88.99 ± 0.84</b> |
| F2          | MLRF   | 91.16 ± 0.91 | 92.60 ± 0.85 | 91.88 ± 0.58        | 85.75 ± 2.93 | 88.41 ± 1.04 | 87.08 ± 1.23        |
|             | SLRF   | 91.12 ± 1.28 | 92.53 ± 0.78 | 91.83 ± 0.68        | 86.08 ± 1.97 | 88.22 ± 0.91 | 87.15 ± 0.98        |
| F3          | MLRF   | 93.16 ± 0.80 | 98.02 ± 0.32 | <b>96.00 ± 0.40</b> | 85.03 ± 2.02 | 90.89 ± 0.55 | 87.96 ± 0.92        |
|             | SLRF   | 92.30 ± 1.16 | 97.89 ± 0.69 | 95.09 ± 0.60        | 85.15 ± 2.02 | 90.85 ± 0.45 | 88.00 ± 1.02        |
| F4          | MLRF   | 9.91 ± 5.64  | 97.99 ± 0.70 | 53.95 ± 2.74        | 12.35 ± 7.19 | 98.46 ± 0.60 | 55.41 ± 3.63        |
|             | SLRF   | 10.37 ± 6.80 | 97.82 ± 0.89 | 54.10 ± 3.31        | 12.79 ± 8.25 | 98.52 ± 0.45 | 55.65 ± 4.08        |
| F5          | MLRF   | 3.26 ± 3.57  | 99.01 ± 0.42 | 51.13 ± 1.74        | 54.10 ± 5.60 | 98.41 ± 0.43 | 76.26 ± 2.73        |
|             | SLRF   | 5.18 ± 4.61  | 98.91 ± 0.53 | 52.05 ± 2.27        | 54.27 ± 5.83 | 98.37 ± 0.50 | 76.32 ± 2.86        |
| Feature set | Method | FDR-TB       |              |                     | MDR-TB       |              |                     |
|             |        | Sensitivity  | Specificity  | AUC                 | Sensitivity  | Specificity  | AUC                 |
|             | DA     | 37.34 ± 3.97 | 98.59 ± 0.22 | 67.96 ± 1.99        | 89.84 ± 1.34 | 99.12 ± 0.17 | 94.48 ± 0.69        |
| F1          | MLRF   | 87.58 ± 2.79 | 92.98 ± 0.45 | <b>90.28 ± 1.23</b> | 95.20 ± 1.07 | 95.04 ± 1.14 | 95.12 ± 0.73        |
|             | SLRF   | 87.27 ± 2.69 | 93.10 ± 0.50 | 90.19 ± 1.27        | 95.27 ± 1.00 | 94.83 ± 0.90 | 95.05 ± 0.58        |
| F2          | MLRF   | 85.29 ± 2.88 | 92.86 ± 0.64 | 89.07 ± 1.44        | 93.60 ± 1.12 | 93.83 ± 0.97 | 93.71 ± 0.52        |
|             | SLRF   | 86.35 ± 2.55 | 92.87 ± 0.52 | 89.61 ± 1.29        | 93.53 ± 1.43 | 93.76 ± 0.88 | 93.64 ± 0.55        |
| F3          | MLRF   | 85.76 ± 3.13 | 92.62 ± 0.74 | 89.19 ± 1.47        | 93.70 ± 0.76 | 97.45 ± 0.36 | <b>95.58 ± 0.41</b> |
|             | SLRF   | 85.90 ± 3.40 | 92.58 ± 0.83 | 89.24 ± 1.51        | 93.77 ± 1.11 | 97.31 ± 0.84 | 95.54 ± 0.67        |
| F4          | MLRF   | 8.67 ± 13.43 | 99.94 ± 0.06 | 54.31 ± 6.72        | 8.92 ± 7.79  | 99.30 ± 0.41 | 54.11 ± 3.81        |
|             | SLRF   | 8.83 ± 13.68 | 99.95 ± 0.07 | 54.39 ± 6.83        | 10.05 ± 8.04 | 99.29 ± 0.40 | 54.67 ± 3.94        |
| F5          | MLRF   | 6.67 ± 13.02 | 99.93 ± 0.07 | 53.30 ± 6.51        | 5.14 ± 5.58  | 99.49 ± 0.28 | 52.32 ± 2.76        |
|             | SLRF   | 7.83 ± 12.74 | 99.92 ± 0.08 | 53.88 ± 6.38        | 7.74 ± 6.99  | 99.39 ± 0.41 | 53.56 ± 3.48        |

Most highly-ranked mutations and their importance are demonstrated in the following tables and figures for MLRF and SLRF and F1-F5 feature sets.

**Table S6.** A summary of top 10 mutations ranked by F1 + MLRF or SLRF. Known resistance-associated mutations to INH, EMB, RIF, and PZA drugs are indicated by <sup>I</sup>, <sup>E</sup>, <sup>R</sup> and <sup>P</sup>, respectively. Lineage-associated mutations are indicated by \* and unknown mutations in boldface.

|                 |                                                                                                                                                                                                                                                                                                                                                      |
|-----------------|------------------------------------------------------------------------------------------------------------------------------------------------------------------------------------------------------------------------------------------------------------------------------------------------------------------------------------------------------|
| MLRF + F1       | <i>katG</i> .S315T <sup>I</sup> , <i>rpoB</i> .S450L <sup>R</sup> , <i>fabG1</i> .C-15T <sup>I</sup> , <i>embB</i> .M306V <sup>E</sup> , <i>rrs</i> .A1401G, <i>rpoB</i> .D435V <sup>R</sup> , <i>rpoB</i> .H445Y <sup>R</sup> , <i>gyrA</i> .Q613E, <i>pncA</i> .H57D <sup>P</sup> , <i>embB</i> .Q497R <sup>E</sup>                                |
| SLRF + F1 (INH) | <i>katG</i> .S315T <sup>I</sup> , <i>fabG1</i> .C-15T <sup>I</sup> , <i>fabG1</i> .L203L <sup>I</sup> , <i>rpoB</i> .S450L <sup>R</sup> , <i>katG</i> .S315N <sup>I</sup> , <i>fabG1</i> .G-17T <sup>I</sup> , <i>rpoB</i> .V170F <sup>R</sup> , <i>embB</i> .M306V <sup>E</sup> , <i>rpoB</i> .D435V <sup>R</sup> , <i>embB</i> .M306V <sup>E</sup> |
| SLRF + F1 (EMB) | <i>katG</i> .S315T <sup>I</sup> , <i>rpoB</i> .S450L <sup>R</sup> , <i>embB</i> .M306V <sup>E</sup> , <i>embB</i> .M306I <sup>E</sup> , <i>embB</i> .Q497R <sup>E</sup> , <i>rrs</i> .A1401G, <i>rpsL</i> .K43R, <i>gyrA</i> .Q613E, <i>embB</i> .G406S <sup>E</sup> , <i>eis</i> .C-12T                                                             |
| SLRF + F1 (RIF) | <i>rpoB</i> .S450L <sup>R</sup> , <i>katG</i> .S315T <sup>I</sup> , <i>rpoB</i> .H445Y <sup>R</sup> , <i>rpoB</i> .D435V <sup>R</sup> , <i>rpoB</i> .H445D <sup>R</sup> , <i>rpoB</i> .V170F <sup>R</sup> , <i>rpoB</i> .S450W <sup>R</sup> , <i>embB</i> .M306V <sup>E</sup> , <i>embB</i> .Q497R <sup>E</sup> , <i>gyrA</i> .Q613E                 |
| SLRF + F1 (PZA) | <i>katG</i> .S315T <sup>I</sup> , <i>pncA</i> .H57D <sup>P</sup> , <i>rpoB</i> .S450L <sup>R</sup> , <i>embB</i> .M306V <sup>E</sup> , <i>rrs</i> .A1401G, <i>embB</i> .M306I <sup>E</sup> , <i>rpsL</i> .K43R, <i>pncA</i> .A-11G <sup>P</sup> , <i>embB</i> .G406A <sup>E</sup> , <i>pncA</i> .I6L <sup>P</sup>                                    |
| SLRF + F1 (FDR) | <i>katG</i> .S315T <sup>I</sup> , <i>rpoB</i> .S450L <sup>R</sup> , <i>embB</i> .M306V <sup>E</sup> , <i>rrs</i> .A1401G, <i>embB</i> .Q497R <sup>E</sup> , <i>embB</i> .M306I <sup>E</sup> , <i>rpsL</i> .K43R, <b><i>pncA</i>.H51D</b> , <i>pncA</i> .A-11G <sup>P</sup> , <i>gyrA</i> .Q613E                                                      |
| SLRF + F1 (MDR) | <i>rpoB</i> .S450L <sup>R</sup> , <i>katG</i> .S315T <sup>I</sup> , <i>rpoB</i> .D435V <sup>R</sup> , <i>rpoB</i> .H445Y <sup>R</sup> , <i>rpoB</i> .V170F <sup>R</sup> , <i>rpoB</i> .H445D <sup>R</sup> , <i>embB</i> .M306V <sup>E</sup> , <i>embB</i> .Q497R <sup>E</sup> , <i>rpoB</i> .S450W <sup>R</sup> , <i>gyrA</i> .Q613E                 |

**Table S7.** A summary of top 10 mutations ranked by F2 + MLRF or SLRF. Known resistance-associated mutations to INH, EMB, RIF, and PZA drugs are indicated by <sup>I</sup>, <sup>E</sup>, <sup>R</sup> and <sup>P</sup>, respectively. Lineage-associated mutations are indicated by \* and unknown mutations in boldface.

|                 |                                                                                                                                                                                                                                                                                                                                                      |
|-----------------|------------------------------------------------------------------------------------------------------------------------------------------------------------------------------------------------------------------------------------------------------------------------------------------------------------------------------------------------------|
| MLRF + F2       | <i>katG</i> .S315T <sup>I</sup> , <i>rpoB</i> .S450L <sup>R</sup> , <i>fabG1</i> .C-15T <sup>I</sup> , <i>embB</i> .M306V <sup>E</sup> , <i>rpoB</i> .D435V <sup>R</sup> , <i>embB</i> .M3016I <sup>E</sup> , <i>embB</i> .Q497R <sup>E</sup> , <i>rpoB</i> .H445Y <sup>R</sup> , <i>rpoB</i> .H445D <sup>R</sup> , <i>fabG1</i> .L203L <sup>I</sup> |
| SLRF + F2 (INH) | <i>katG</i> .S315T <sup>I</sup> , <i>fabG1</i> .C-15T <sup>I</sup> , <i>fabG1</i> .L203L <sup>I</sup> , <i>rpoB</i> .S450L <sup>R</sup> , <i>katG</i> .S315N <sup>I</sup> , <i>fabG1</i> .G-17T <sup>I</sup> , <i>rpoB</i> .V170F <sup>R</sup> , <i>rpoB</i> .D435V <sup>R</sup> , <i>embB</i> .M306I <sup>E</sup> , <b><i>embC</i>.R927R</b>        |
| SLRF + F2 (EMB) | <i>katG</i> .S315T <sup>I</sup> , <i>rpoB</i> .S450L <sup>R</sup> , <i>embB</i> .M306V <sup>E</sup> , <i>embB</i> .M306I <sup>E</sup> , <i>embB</i> .Q497R <sup>E</sup> , <i>embB</i> .G406S <sup>E</sup> , <i>fabG1</i> .C-15T <sup>I</sup> , <b><i>embC</i>.R927R</b> , <i>rpoB</i> .I491F <sup>R</sup> , <i>embB</i> .C-12T <sup>E</sup>          |
| SLRF + F2 (RIF) | <i>rpoB</i> .S450L <sup>R</sup> , <i>katG</i> .S315T <sup>I</sup> , <i>rpoB</i> .H445Y <sup>R</sup> , <i>rpoB</i> .D435V <sup>R</sup> , <i>rpoB</i> .H445D <sup>R</sup> , <i>rpoB</i> .V170F <sup>R</sup> , <i>rpoB</i> .S450W <sup>R</sup> , <i>embB</i> .M306V <sup>E</sup> , <i>embB</i> .Q497R <sup>E</sup> , <i>embB</i> .M306I <sup>E</sup>    |
| SLRF + F2 (PZA) | <i>katG</i> .S315T <sup>I</sup> , <i>embB</i> .M306V <sup>E</sup> , <i>rpoB</i> .S450L <sup>R</sup> , <i>rpsA</i> .A440T*, <i>embB</i> .N13S <sup>E</sup> , <i>embB</i> .M306I <sup>E</sup> , <i>rpoB</i> .E761D <sup>R</sup> , <i>embB</i> .Q497R <sup>E</sup> , <i>embB</i> .G406A <sup>E</sup> , <i>rpoB</i> .I491F <sup>R</sup>                  |
| SLRF + F2 (FDR) | <i>katG</i> .S315T <sup>I</sup> , <i>rpoB</i> .S450L <sup>R</sup> , <i>embB</i> .M306V <sup>E</sup> , <i>embB</i> .Q497R <sup>E</sup> , <i>embB</i> .M306I <sup>E</sup> , <i>rpoB</i> .I491F <sup>R</sup> , <i>embB</i> .G406A <sup>E</sup> , <i>embA</i> .C-12T <sup>E</sup> , <i>fabG1</i> .C-15T <sup>I</sup> , <b><i>embC</i>.R927R</b>          |
| SLRF + F2 (MDR) | <i>rpoB</i> .S450L <sup>R</sup> , <i>katG</i> .S315T <sup>I</sup> , <i>rpoB</i> .D435V <sup>R</sup> , <i>rpoB</i> .H445Y <sup>R</sup> , <i>embB</i> .M306V <sup>E</sup> , <i>rpoB</i> .V170F <sup>R</sup> , <i>rpoB</i> .H445D <sup>R</sup> , <i>embB</i> .M306I <sup>E</sup> , <i>rpoB</i> .S450W <sup>R</sup> , <i>embB</i> .Q497R <sup>E</sup>    |

**Table S8.** A summary of top 10 mutations ranked by F3 + MLRF or SLRF. Known resistance-associated mutations to INH, EMB, RIF and PZA drugs are indicated by <sup>I</sup>, <sup>E</sup>, <sup>R</sup> and <sup>P</sup>, respectively. Lineage-associated mutations are indicated by \* and unknown mutations in boldface.

|                 |                                                                                                                                                                                                                                                                                                                                                      |
|-----------------|------------------------------------------------------------------------------------------------------------------------------------------------------------------------------------------------------------------------------------------------------------------------------------------------------------------------------------------------------|
| MLRF + F3       | <i>katG</i> .S315T <sup>I</sup> , <i>rpoB</i> .S450L <sup>R</sup> , <i>fabG1</i> .C-15T <sup>I</sup> , <i>embB</i> .M306V <sup>E</sup> , <i>rpoB</i> .D435V <sup>R</sup> , <i>embB</i> .Q497R <sup>E</sup> , <i>embB</i> .M3016I <sup>E</sup> , <i>rpoB</i> .H445Y <sup>R</sup> , <i>pncA</i> .H57D <sup>P</sup> , <i>rpoB</i> .I491F <sup>R</sup>   |
| SLRF + F3 (INH) | <i>katG</i> .S315T <sup>I</sup> , <i>fabG1</i> .C-15T <sup>I</sup> , <i>fabG1</i> .L203L <sup>I</sup> , <i>rpoB</i> .S450L <sup>R</sup> , <i>katG</i> .S315N <sup>I</sup> , <i>fabG1</i> .G-17T <sup>I</sup> , <i>rpoB</i> .V170F <sup>R</sup> , <i>embB</i> .M306V <sup>E</sup> , <i>embB</i> .M306I <sup>E</sup> , <i>rpoB</i> .D435V <sup>R</sup> |
| SLRF + F3 (EMB) | <i>katG</i> .S315T <sup>I</sup> , <i>rpoB</i> .S450L <sup>R</sup> , <i>embB</i> .M306V <sup>E</sup> , <i>embB</i> .M306I <sup>E</sup> , <i>embB</i> .Q497R <sup>E</sup> , <i>embB</i> .G406S <sup>E</sup> , <i>fabG1</i> .C-15T <sup>I</sup> , <i>embA</i> .C-12T <sup>E</sup> , <i>rpoB</i> .I491F <sup>R</sup> , <i>embB</i> .G406A <sup>E</sup>   |
| SLRF + F3 (RIF) | <i>rpoB</i> .S450L <sup>R</sup> , <i>katG</i> .S315T <sup>I</sup> , <i>rpoB</i> .H445Y <sup>R</sup> , <i>rpoB</i> .D435V <sup>R</sup> , <i>rpoB</i> .H445D <sup>R</sup> , <i>rpoB</i> .V170F <sup>R</sup> , <i>rpoB</i> .S450W <sup>R</sup> , <i>embB</i> .M306I <sup>E</sup> , <i>embB</i> .M306V <sup>E</sup> , <i>embB</i> .Q497R <sup>E</sup>    |
| SLRF + F3 (PZA) | <i>katG</i> .S315T <sup>I</sup> , <i>pncA</i> .H57D <sup>P</sup> , <i>embB</i> .M306V <sup>E</sup> , <i>rpoB</i> .S450L <sup>R</sup> , <i>embB</i> .M306I <sup>E</sup> , <i>pncA</i> .A-11G <sup>P</sup> , <i>embB</i> .Q497R <sup>E</sup> , <i>embB</i> .D354A <sup>E</sup> , <i>rpoB</i> .I491F <sup>R</sup> , <i>embB</i> .G406A <sup>E</sup>     |
| SLRF + F3 (FDR) | <i>katG</i> .S315T <sup>I</sup> , <i>rpoB</i> .S450L <sup>R</sup> , <i>embB</i> .M306V <sup>E</sup> , <i>embB</i> .Q497R <sup>E</sup> , <i>embB</i> .M306I <sup>E</sup> , <i>rpoB</i> .I491F <sup>R</sup> , <i>pncA</i> .A-11G <sup>P</sup> , <i>fabG1</i> .C-15T <sup>I</sup> , <i>embB</i> .G406A <sup>E</sup> , <i>embA</i> .Q10P <sup>E</sup>    |
| SLRF + F3 (MDR) | <i>rpoB</i> .S450L <sup>R</sup> , <i>katG</i> .S315T <sup>I</sup> , <i>rpoB</i> .D435V <sup>R</sup> , <i>rpoB</i> .H445Y <sup>R</sup> , <i>embB</i> .M306V <sup>E</sup> , <i>rpoB</i> .V170F <sup>R</sup> , <i>rpoB</i> .H445D <sup>R</sup> , <i>embB</i> .M306I <sup>E</sup> , <i>embB</i> .Q497R <sup>E</sup> , <i>rpoB</i> .S450W <sup>R</sup>    |



**Table S9.** A summary of top 10 mutations ranked by F4 + MLRF or SLRF. Known resistance-associated mutations to INH, EMB, RIF and PZA drugs are indicated by <sup>I</sup>, <sup>E</sup>, <sup>R</sup> and <sup>P</sup>, respectively. Lineage-associated mutations are indicated by \* and unknown mutations in boldface.

|                 |                                                                                                                                                                                                                                                             |
|-----------------|-------------------------------------------------------------------------------------------------------------------------------------------------------------------------------------------------------------------------------------------------------------|
| MLRF + F4       | <i>gyrA</i> _G668D*, <b><i>embA</i>_L262L</b> , <i>eis</i> _C-12T, <b><i>katG</i>_N493K</b> , <i>rpoB</i> _I925V, <b><i>rpoB</i>_M707T</b> , <i>gyrA</i> _L421L, <i>gyrA</i> _T836K, <i>gyrA</i> _S95T*, <b><i>embC</i>_L121L</b>                           |
| SLRF + F4 (INH) | <i>gyrA</i> _G668D*, <i>fabG1</i> _T-8A, <i>katG</i> _Q461P, <b><i>katG</i>_G491S</b> , <i>gyrA</i> _S95T*, <b><i>embR</i>_S104R</b> , <i>katG</i> _R463L*, <b><i>embA</i>_L262L</b> , <b><i>embB</i>_G18G</b> , <i>gyrA</i> _L421L                         |
| SLRF + F4 (EMB) | <i>gyrA</i> _L421L, <b><i>embA</i>_L262L</b> , <b><i>rpoB</i>_M707T</b> , <b><i>embC</i>_V469M</b> , <i>eis</i> _R181*, <i>eis</i> _C-12T, <b><i>manB</i>_E153G</b> , <b><i>embC</i>_L121L</b> , <i>gyrA</i> _G668D*, <b><i>embC</i>_F324F</b>              |
| SLRF + F4 (RIF) | <i>gidB</i> _R96C, <b><i>embA</i>_L262L</b> , <i>eis</i> _L191L, <i>gyrA</i> _G668D*, <b><i>katG</i>_N493K</b> , <b><i>rpoB</i>_E959K</b> , <i>gyrB</i> _R173R, <i>eis</i> _R181*, <i>eis</i> _R181*, <i>eis</i> _C-12T                                     |
| SLRF + F4 (PZA) | <b><i>embB</i>_D191D</b> , <b><i>embA</i>_L262L</b> , <i>gyrA</i> _G668D*, <i>gyrB</i> _R173R, <b><i>embC</i>_L121L</b> , <b><i>katG</i>_W300R</b> , <i>gyrB</i> _E63K, <b><i>rpoB</i>_S12T</b> , <b><i>embA</i>_V558L</b> , <i>manB</i> _G575 <sup>E</sup> |
| SLRF + F4 (FDR) | <b><i>embA</i>_L262L</b> , <i>eis</i> _C-12T, <i>gyrA</i> _T836K, <i>rpoB</i> _I925V, <i>gyrA</i> _G668D*, <i>gidB</i> _Y195H, <b><i>rpoB</i>_A1075A</b> , <i>katG</i> _C-85T <sup>I</sup> , <i>eis</i> _906.delG, <i>tlyA</i> _L11L                        |
| SLRF + F4 (MDR) | <i>gyrA</i> _G668D*, <b><i>embA</i>_L262L</b> , <b><i>katG</i>_N493K</b> , <b><i>embB</i>_K938K</b> , <i>eis</i> _C-12T, <i>eis</i> _R181*, <b><i>rpoB</i>_M707T</b> , <b><i>manB</i>_E153G</b> , <i>gyrA</i> _L421L, <i>gyrA</i> _T836K                    |

**Table S10.** A summary of top 10 mutations ranked by F5 + MLRF or SLRF. Known resistance-associated mutations to INH, EMB, RIF and PZA drugs are indicated by <sup>I</sup>, <sup>E</sup>, <sup>R</sup> and <sup>P</sup>, respectively. Lineage-associated mutations are indicated by \* and unknown mutations in boldface.

|                 |                                                                                                                                                                                                                                                                                           |
|-----------------|-------------------------------------------------------------------------------------------------------------------------------------------------------------------------------------------------------------------------------------------------------------------------------------------|
| MLRF + F5       | <i>rpsA</i> _A440T*, <i>embB</i> _N13S <sup>E</sup> , <b><i>embA</i>_L262L</b> , <b><i>katG</i>_N493K</b> , <b><i>manB</i>_E153G</b> , <b><i>embB</i>_K938K</b> , <b><i>rpoB</i>_M707T</b> , <b><i>embA</i>_P285P</b> , <i>katG</i> _T271I, <b><i>embB</i>_D191D</b>                      |
| SLRF + F5 (INH) | <i>katG</i> _R463L*, <i>katG</i> _Q461P, <i>fabG1</i> _T-8A <b><i>embA</i>_L262L</b> , <b><i>embR</i>_S104R</b> , <b><i>katG</i>_G491S</b> , <b><i>rpoB</i>_A1075A</b> , <i>katG</i> _T271I, <b><i>katG</i>_N493K</b> , <b><i>embR</i>_M11</b>                                            |
| SLRF + F5 (EMB) | <b><i>embA</i>_L262L</b> , <b><i>embC</i>_V469M</b> , <i>ndh</i> _A247A, <b><i>rpoB</i>_M707T</b> , <b><i>embC</i>_L121L</b> , <b><i>manB</i>_E153G</b> , <i>rpoB</i> _I925V, <b><i>embC</i>_F324F</b> , <b><i>embA</i>_L426L</b> , <b><i>embA</i>_I905V</b>                              |
| SLRF + F5 (RIF) | <b><i>katG</i>_N493K</b> , <b><i>embA</i>_L262L</b> , <b><i>katG</i>_S539S</b> , <b><i>rpoB</i>_E959K</b> , <b><i>embB</i>_K938K</b> , <b><i>manB</i>_E153G</b> , <i>katG</i> _Y28* <sup>I</sup> , <b><i>rpoB</i>_G1157G</b> , <b><i>rpoB</i>_M707T</b> , <i>katG</i> _T271I <sup>I</sup> |
| SLRF + F5 (PZA) | <i>rpsA</i> _A440T*, <i>embB</i> _N13S <sup>T</sup> <sup>E</sup> , <b><i>embB</i>_D191D</b> , <i>embB</i> _A680T <sup>E</sup> , <b><i>embA</i>_L262L</b> , <i>iniA</i> _M11, <b><i>embA</i>_V558L</b> , <b><i>embR</i>_A125A</b> , <b><i>embC</i>_L121L</b> , <b><i>katG</i>_G-28T</b>    |
| SLRF + F5 (FDR) | <b><i>embA</i>_L262L</b> , <i>rpoB</i> _I925V, <b><i>rpoB</i>_A1075A</b> , <b><i>embC</i>_R927R</b> , <b><i>embB</i>_G18G</b> , <i>inhA</i> _G3G, <i>rpsA</i> _R212R, <i>rpsA</i> _D35D, <i>iniA</i> _D100G <sup>E</sup> , <b><i>embA</i>_C76C</b>                                        |
| SLRF + F5 (MDR) | <b><i>katG</i>_N493K</b> , <b><i>embA</i>_L262L</b> , <i>katG</i> _T271I, <b><i>rpoB</i>_M707T</b> , <b><i>manB</i>_E153G</b> , <b><i>embB</i>_K938K</b> , <i>katG</i> _Y28*, <i>rpoB</i> _I925V, <b><i>rpoB</i>_A1075A</b> , <i>embB</i> _A454T <sup>E</sup>                             |

The red bars demonstrate the features' importance, along with their inter-trees variability (black lines). The displayed weights are normalised (sum of weights is equal to one).

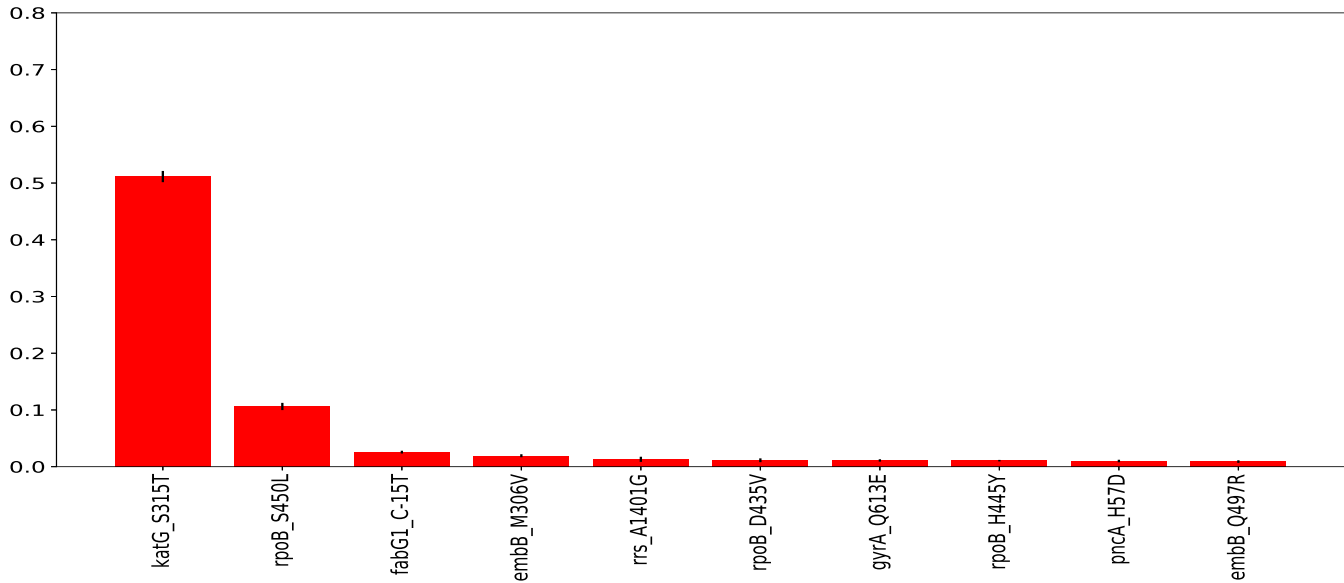

**Figure S5.** The top 10 mutations ranked by MLRF + F1 for all first-line drugs. *katG\_S315T* and *fabG1\_C-15T* for INH, *embB\_M306V* and *embB\_Q497R* for EMB, *rpoB\_S450L*, *rpoB\_H445Y*, and *rpoB\_D435V* for RIF, and *pncA\_H57D* for PZA are known resistance-associated markers.

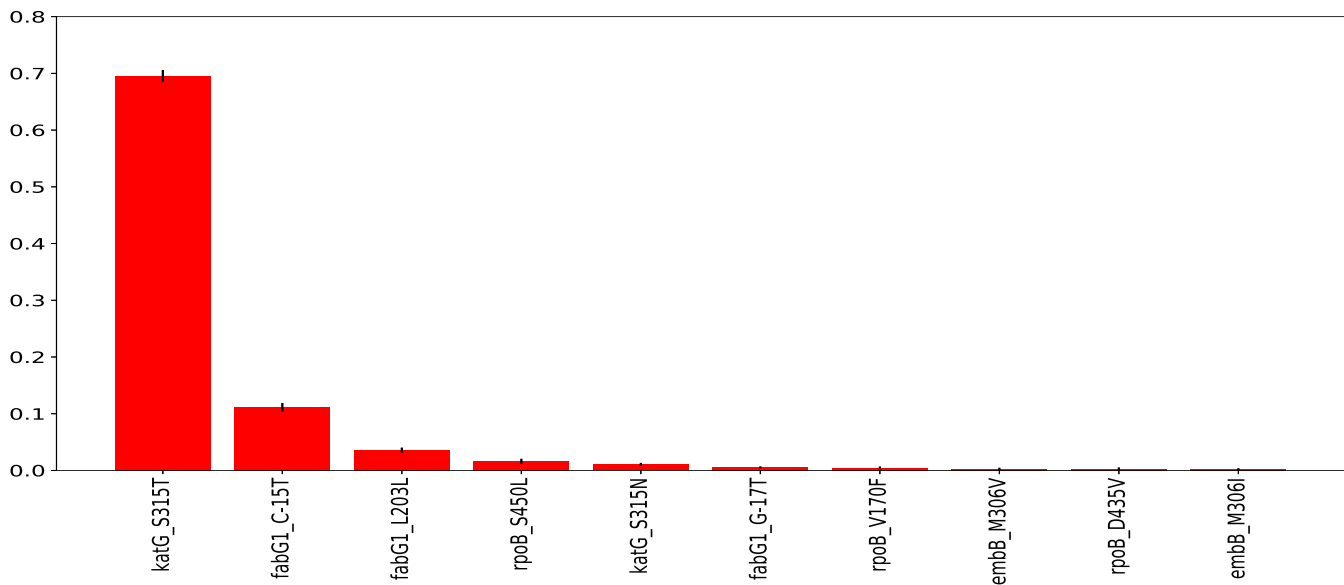

**Figure S6.** The top 10 mutations ranked by SLRF + F1 for INH. *katG\_S315T*, *fabG1\_C-15T*, *fabG1\_L203L*, *KatG\_S315N*, and *fabG1\_G-17T* for INH, *embB\_M306V* and *embB\_M306I* for EMB, and *rpoB\_S450L*, *rpoB\_V170F*, and *rpoB\_D435V* for RIF are known resistance-associated markers.

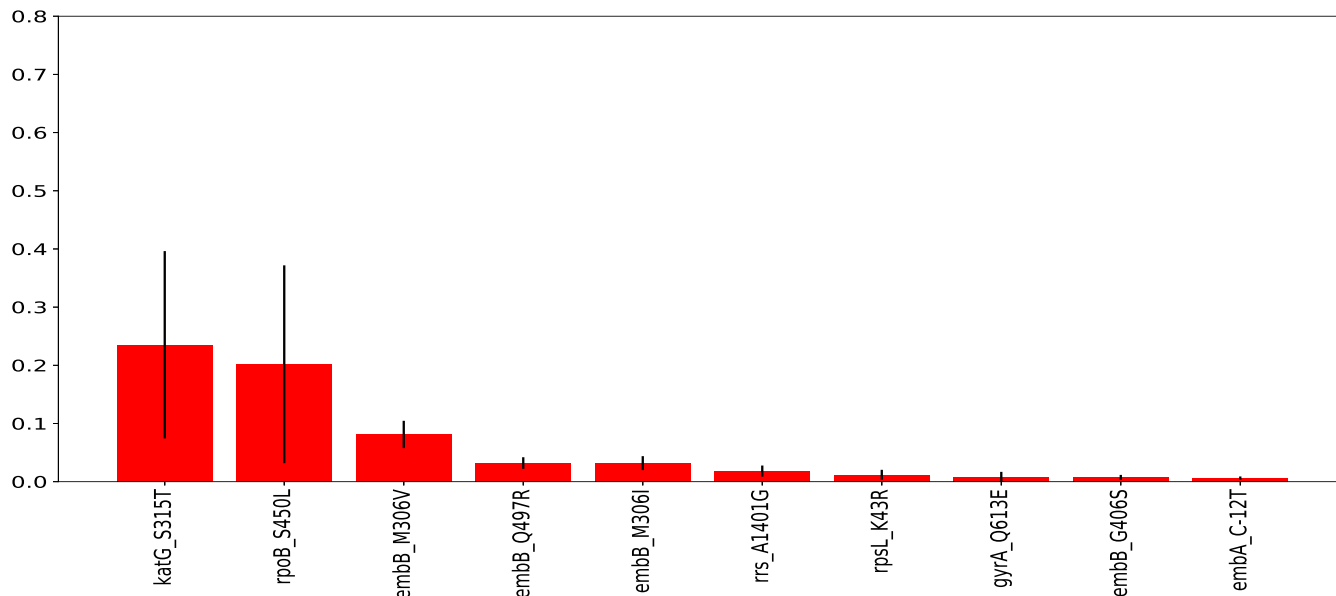

**Figure S7.** The top 10 mutations ranked by SLRF + F1 for EMB. *katG\_S315T* for INH, *embB\_M306V*, *embB\_M306I*, *embB\_Q497R*, and *embB\_G406S* for EMB, and *rpoB\_S450L* for RIF are known resistance-associated markers.

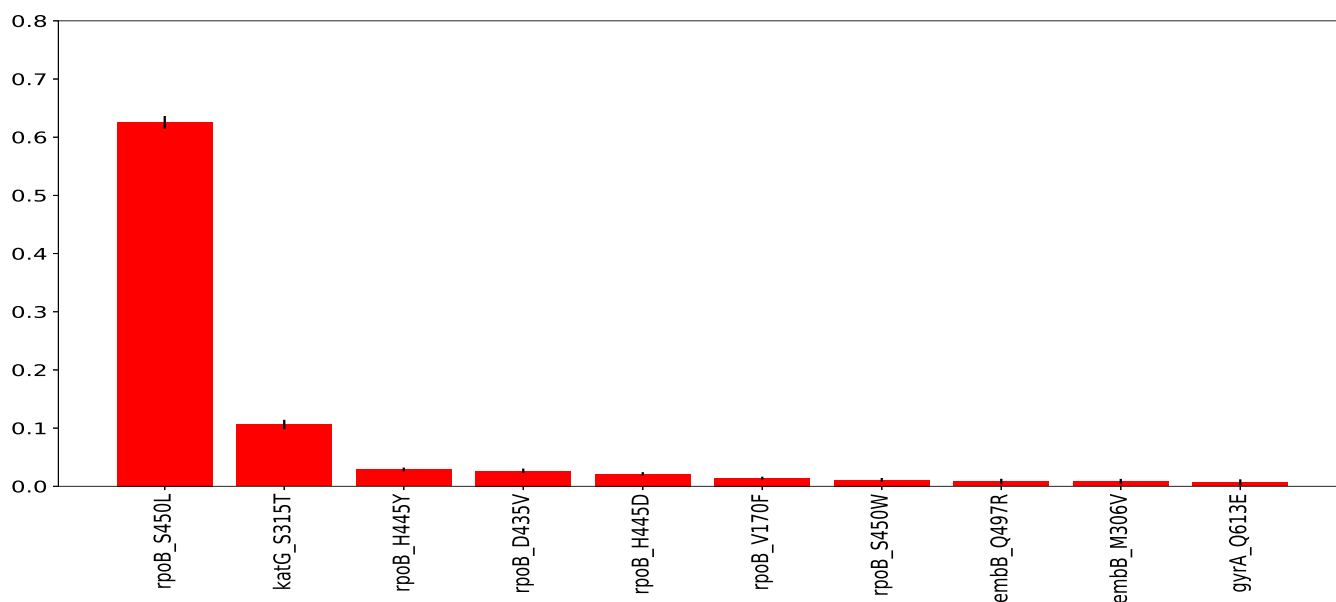

**Figure S8.** The top 10 mutations ranked by SLRF + F1 for RIF. *katG\_S315T* for INH, *embB\_M306V* and *embB\_Q497R* for EMB, and *rpoB\_S450L*, *rpoB\_H445Y*, *rpoB\_V170F*, *rpoB\_H445D*, *rpoB\_S450W*, and *rpoB\_D435V* for RIF are known resistance-associated markers.

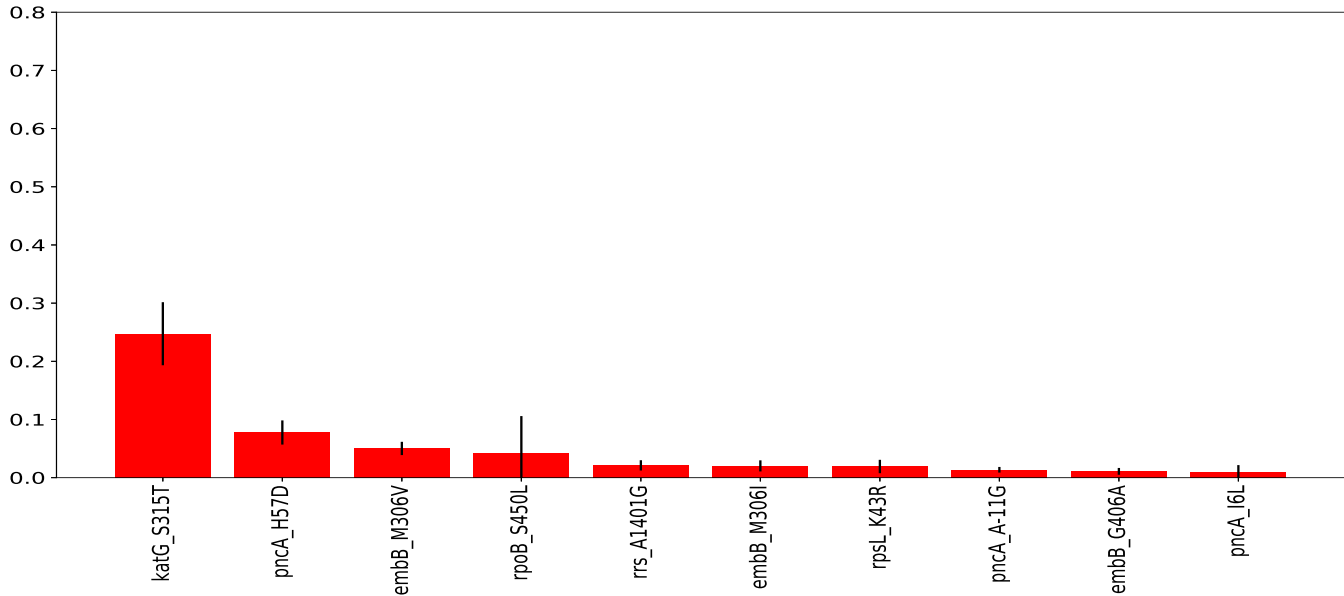

**Figure S9.** The top 10 mutations ranked by SLRF + F1 for PZA. *katG\_S315T* for INH, *embB\_M306V*, *embB\_M306I*, and *embB\_G406A* for EMB, *rpoB\_S450L* for RIF, and *pncA\_H57D*, *pncA\_A-11G* and *pncA\_I6T* for PZA are known resistance-associated markers.

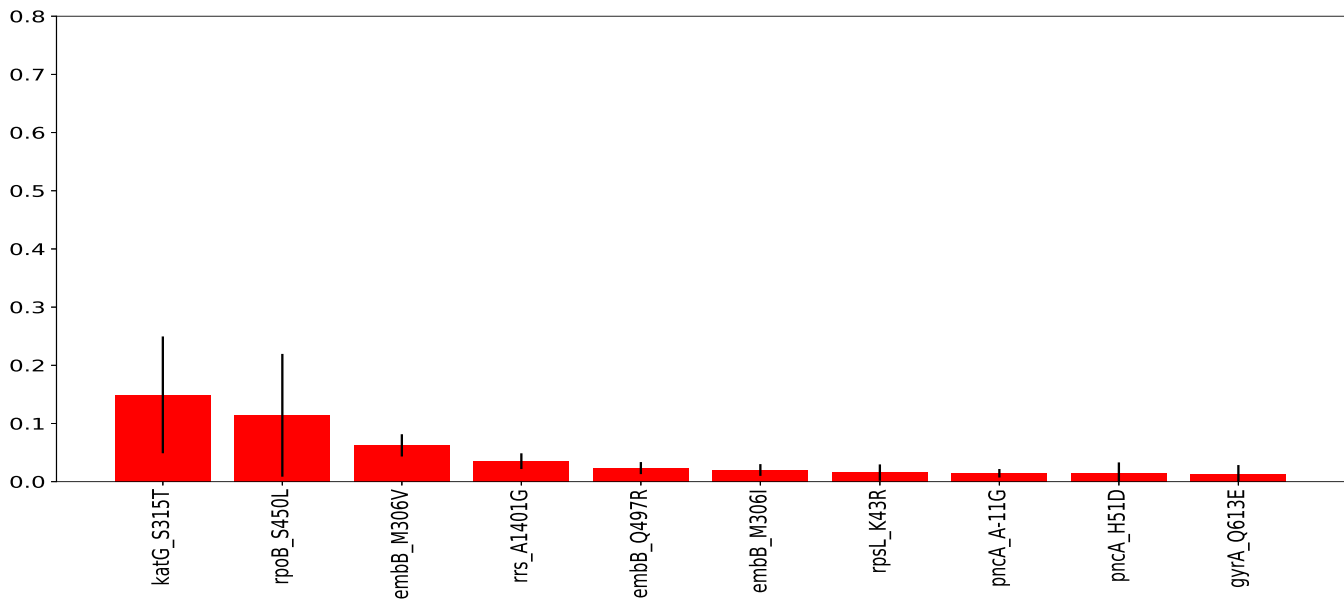

**Figure S10.** The top 10 mutations ranked by SLRF + F1 for FDR. *katG\_S315T* for INH, *embB\_M306V*, *embB\_Q497R*, and *embB\_M306I* for EMB, *rpoB\_S450L* for RIF, and *pncA\_A-11G* for PZA are known resistance-associated markers. *pncA\_H51D* is not in the known catalog that can be a resistant/susceptible-associated marker.

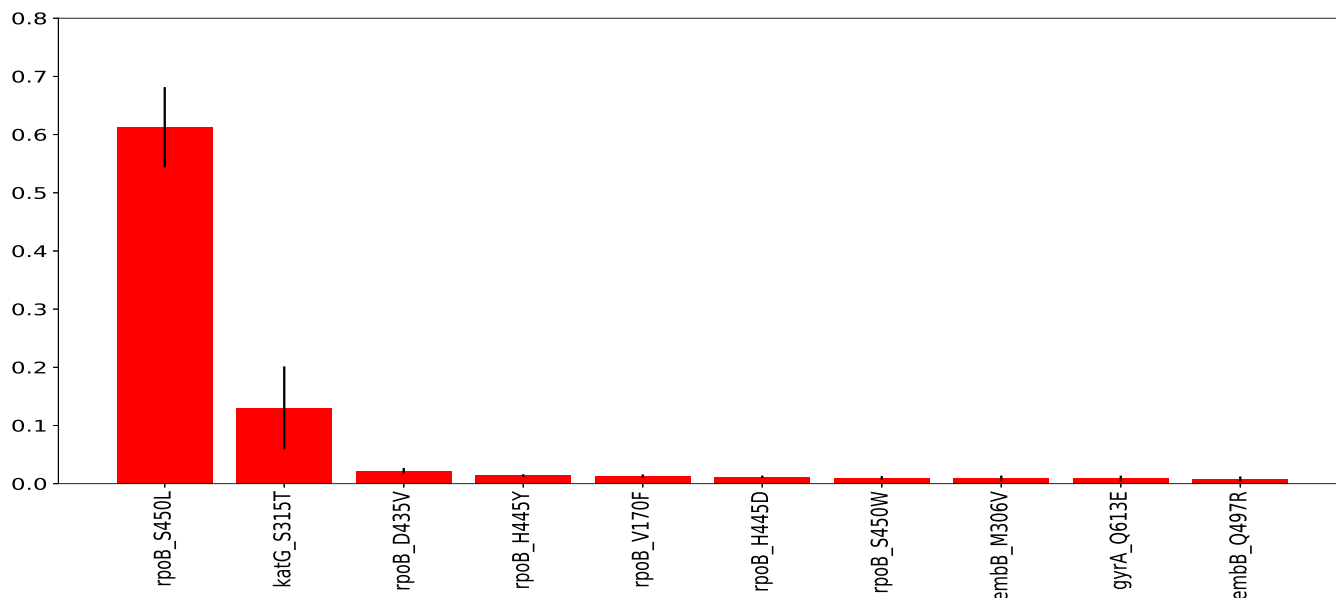

**Figure S11.** The top 10 mutations ranked by SLRF + F1 for MDR. *katG\_S315T* for INH, *embB\_M306V* and *embB\_Q497R* for EMB, and *rpoB\_S450L*, *rpoB\_S450W*, *rpoB\_H445Y*, *rpoB\_V170F*, *rpoB\_H445D*, and *rpoB\_D435V* for RIF are known resistance-associated markers.

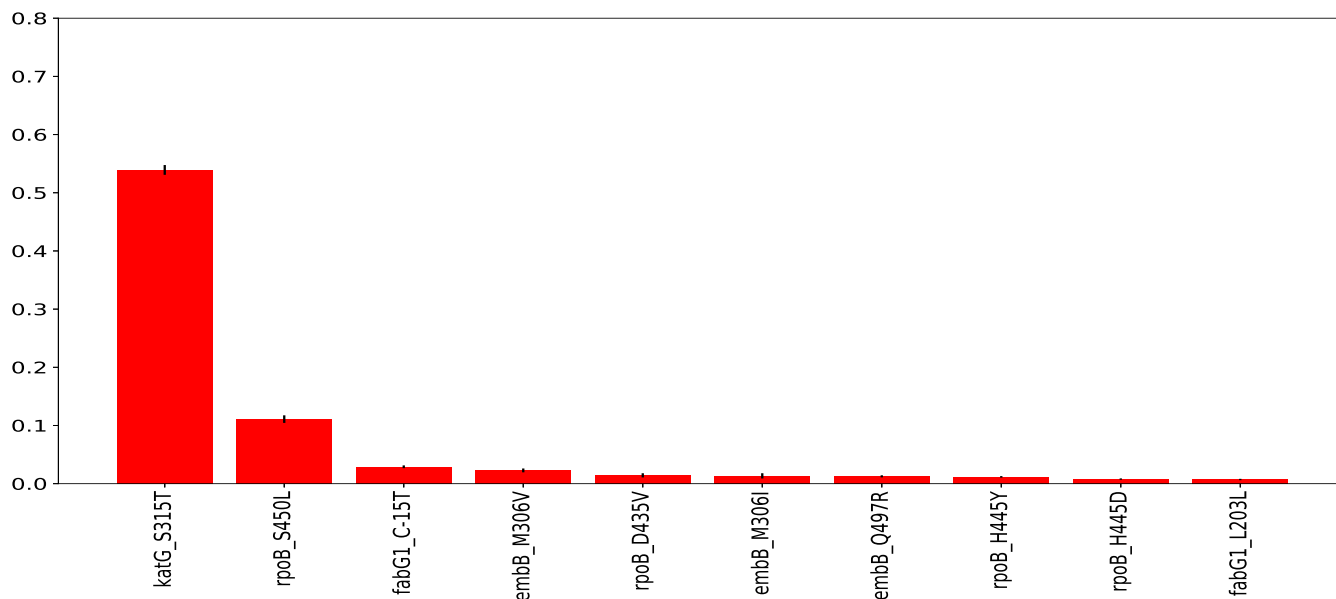

**Figure S12.** The top 10 mutations ranked by MLRF + F2 for all first-line drugs. *katG\_S315T*, *fabG1\_L203L*, and *fabG1\_C-15T* for INH, *embB\_M306V*, *embB\_Q497R*, and *embB\_M306I* for EMB, *rpoB\_S450L*, *rpoB\_H445Y*, *rpoB\_H445D*, and *rpoB\_D435V* for RIF are known resistance-associated markers.

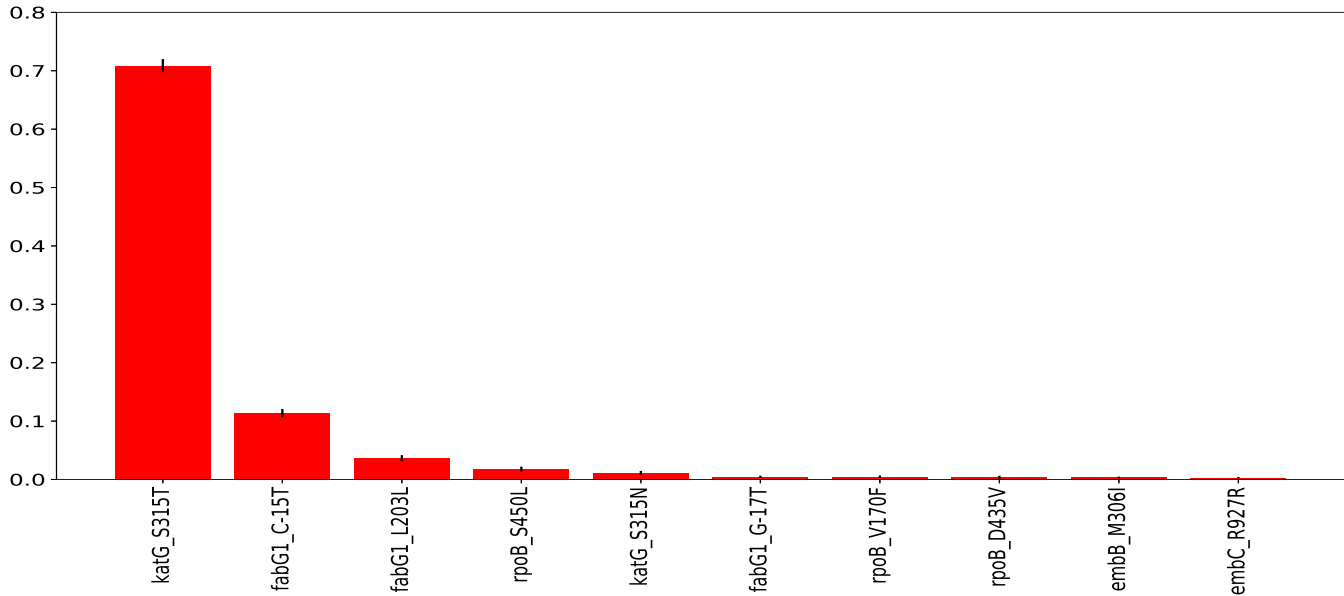

**Figure S13.** The top 10 mutations ranked by SLRF + F2 for INH. *katG\_S315T*, *fabG1\_C-15T*, *fabG1\_L203L*, *KatG\_S315N*, and *fabG1\_G-17T* for INH, *embB\_M306V* for EMB, and *rpoB\_S450L*, *rpoB\_D435V*, and *rpoB\_V170F* for RIF are known resistance-associated markers. *embC\_R927R* is not in the known catalog that can be a resistant/susceptible-associated marker.

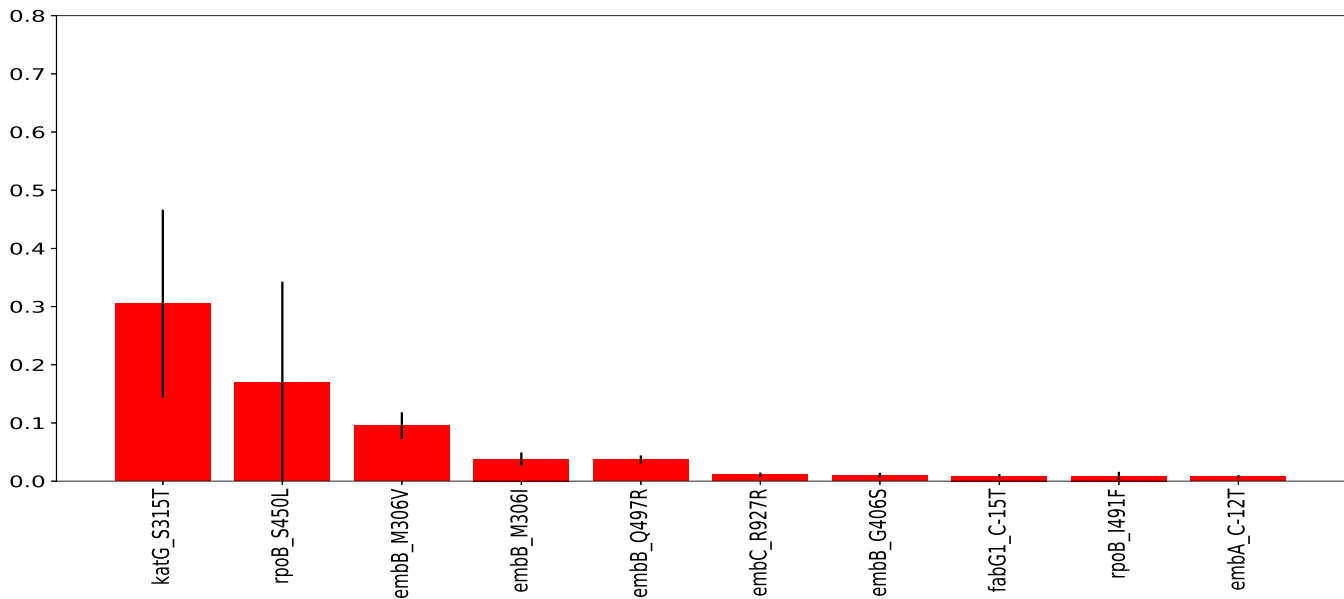

**Figure S14.** The top 10 mutations ranked by SLRF + F2 for EMB. *katG\_S315T* and *fabG1\_C-15T* for INH, *embB\_M306V*, *embB\_M306I*, *embB\_Q497R*, and *embB\_G406S* and *embB\_C-12T* for EMB, and *rpoB\_S450L* and *rpoB\_I491F* for RIF are known resistance-associated markers. *embC\_R927R* is not in the known catalog that can be a resistant/susceptible-associated marker.

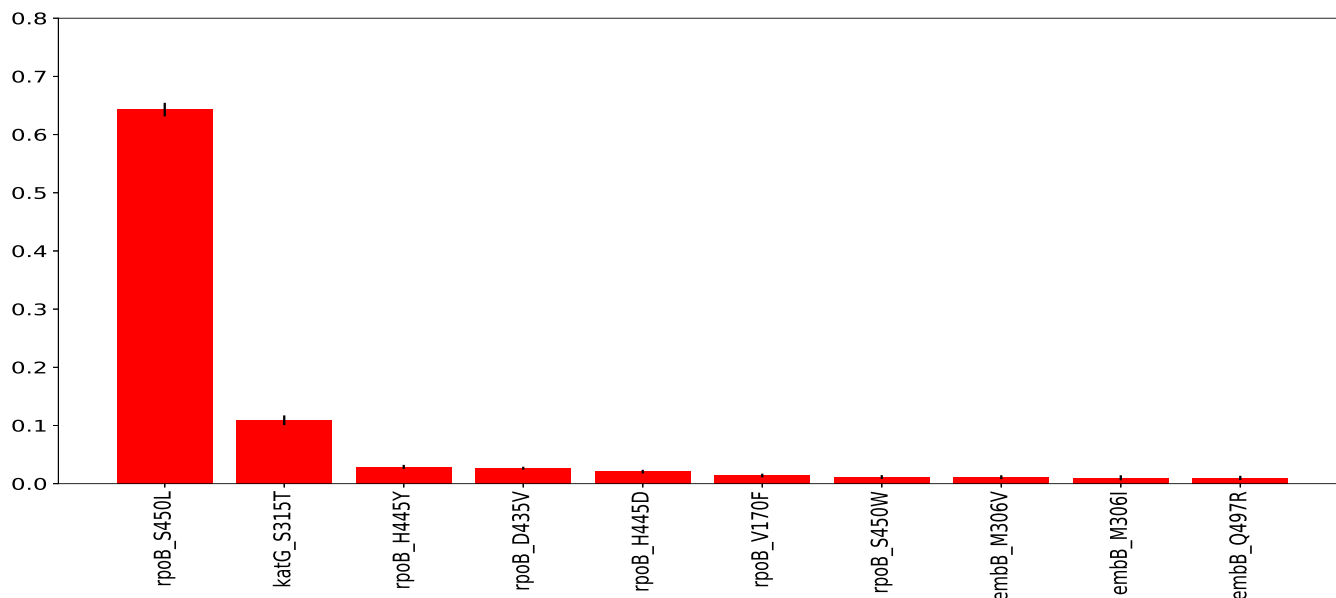

**Figure S15.** The top 10 mutations ranked by SLRF + F2 for RIF. *katG\_S315T* for INH, *embB\_Q497R*, *embB\_M306V*, and *embB\_M306I* for EMB, and *rpoB\_S40DL*, *rpoB\_H445Y*, *rpoB\_V170F*, *rpoB\_H445D*, *rpoB\_S450W*, and *rpoB\_D435V* for RIF are known resistance-associated markers.

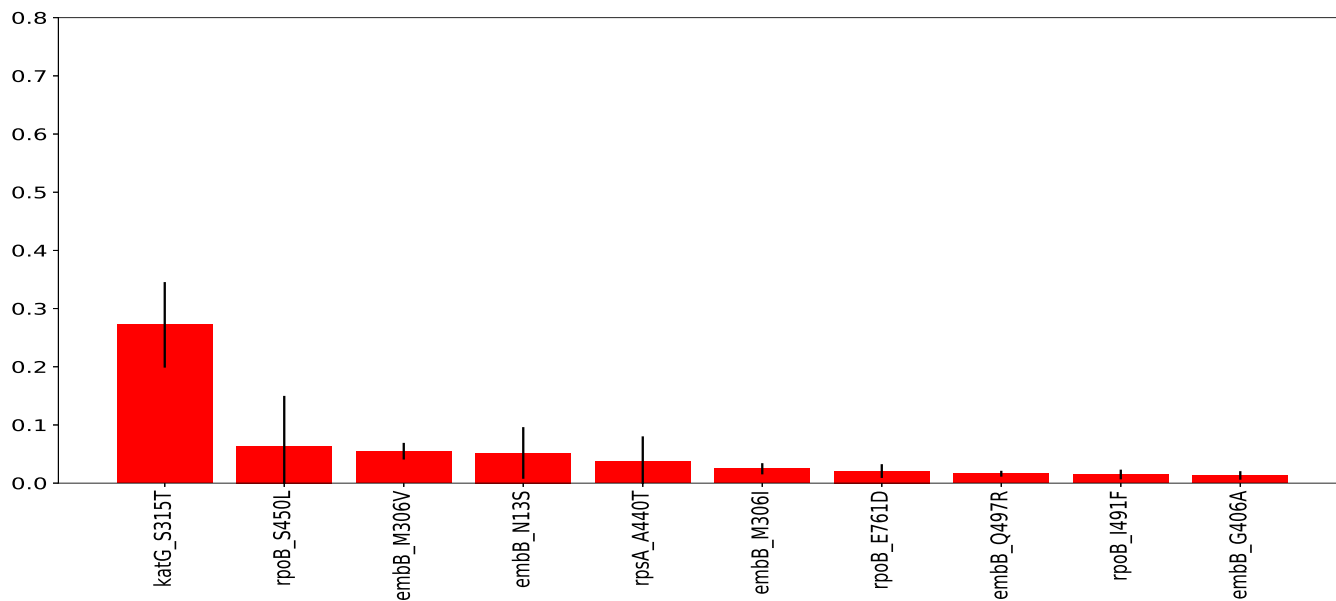

**Figure S16.** The top 10 mutations ranked by SLRF + F2 for PZA. *katG\_S315T* for INH, *embB\_M306V*, *embB\_M306I*, *embB\_G406A*, and *embB\_Q497R* for EMB, and *rpoB\_S450L*, *rpoB\_E761D*, and *rpoB\_I491F* for RIF are known resistance-associated markers. *embB\_N13S* is a susceptible-associated marker for EMB and *rpsA\_A440T* is a lineage-defining marker.

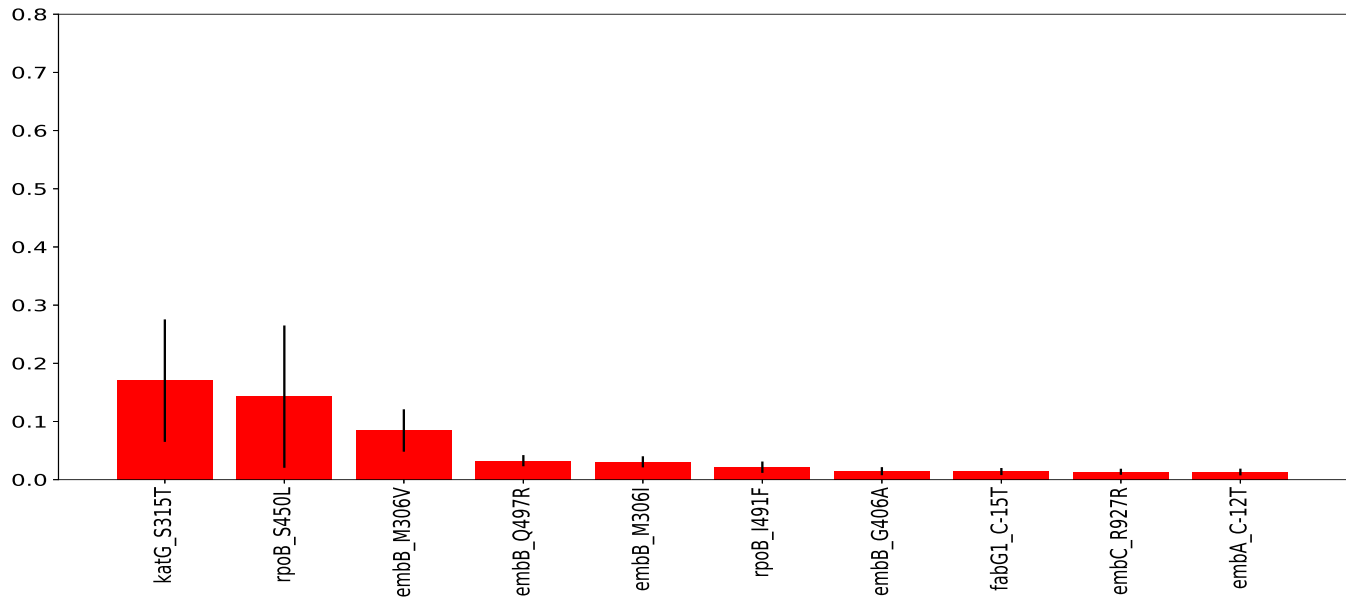

**Figure S17.** The top 10 mutations ranked by SLRF + F2 for FDR. *katG\_S315T* and *fabG1\_C-15T* for INH, *embB\_M306V*, *embB\_Q497R*, *embB\_G406A*, *embA\_C-12T*, and *embB\_M306I* for EMB, and *rpoB\_S450L* and *rpoB\_I491F* for RIF are known resistance-associated markers. *embA\_R927R* is not in the known catalog that can be a resistant/susceptible-associated marker.

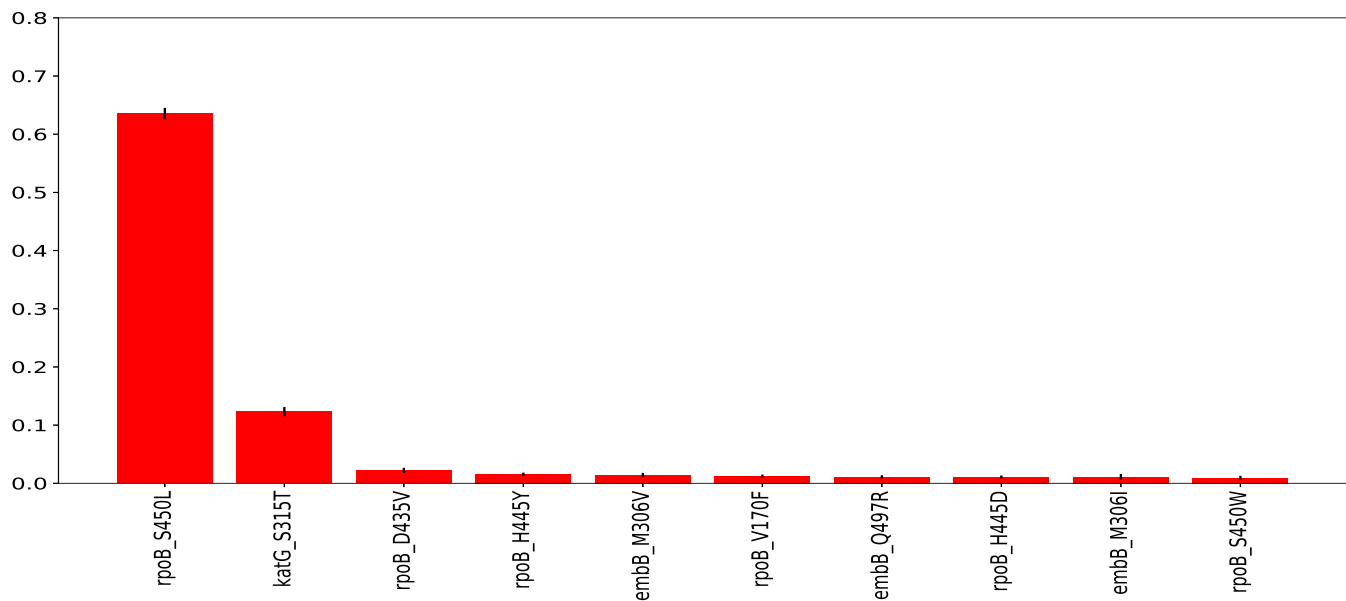

**Figure S18.** The top 10 mutations ranked by SLRF + F2 for MDR. *katG\_S315T* for INH, *embB\_M306V*, *embB\_M306I*, and *embB\_Q497R* for EMB and *rpoB\_S450L*, *rpoB\_S450W*, *rpoB\_H445Y*, *rpoB\_V170F*, *rpoB\_H445D*, and *rpoB\_D435V* for RIF are known resistance-associated markers.



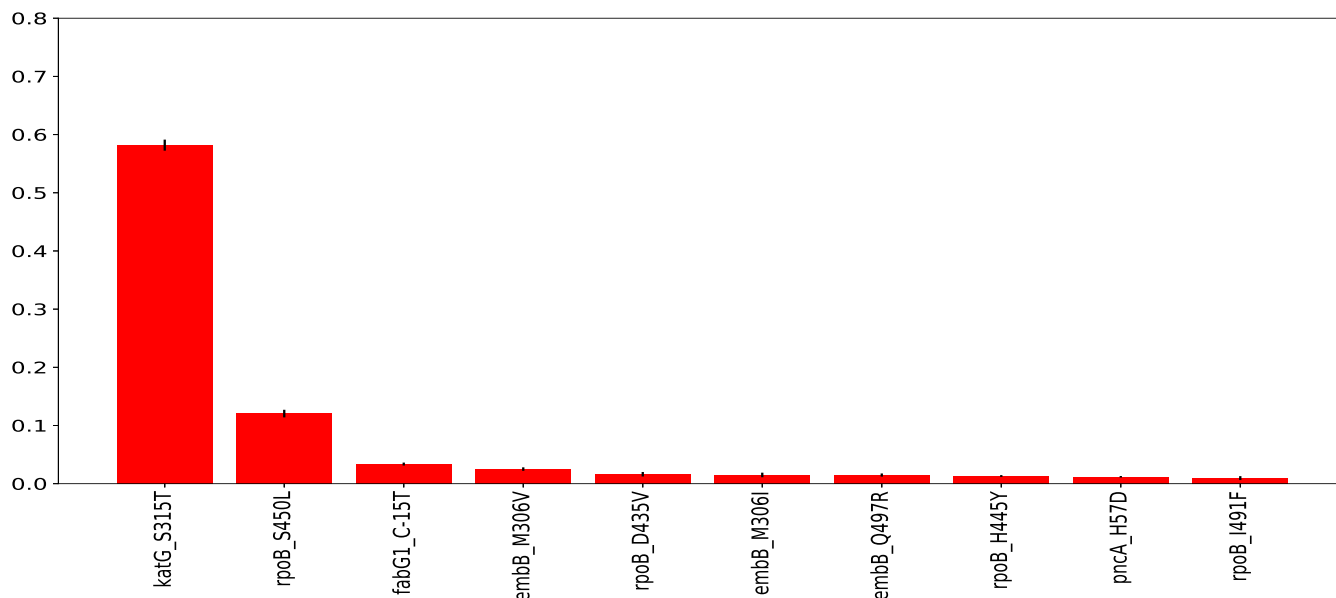

**Figure S19.** The top 10 mutations ranked by MLRF + F3 for all first-line drugs. *katG\_S315T* and *fabG1\_C-15T* for INH, *embB\_M306V*, *embB\_M306I*, and *embB\_Q497R* for EMB, *rpoB\_S450L*, *rpoB\_H445Y*, *rpoB\_I491F*, and *rpoB\_D435V* for RIF, and *pncA\_H57D* for PZA are known resistance-associated markers.

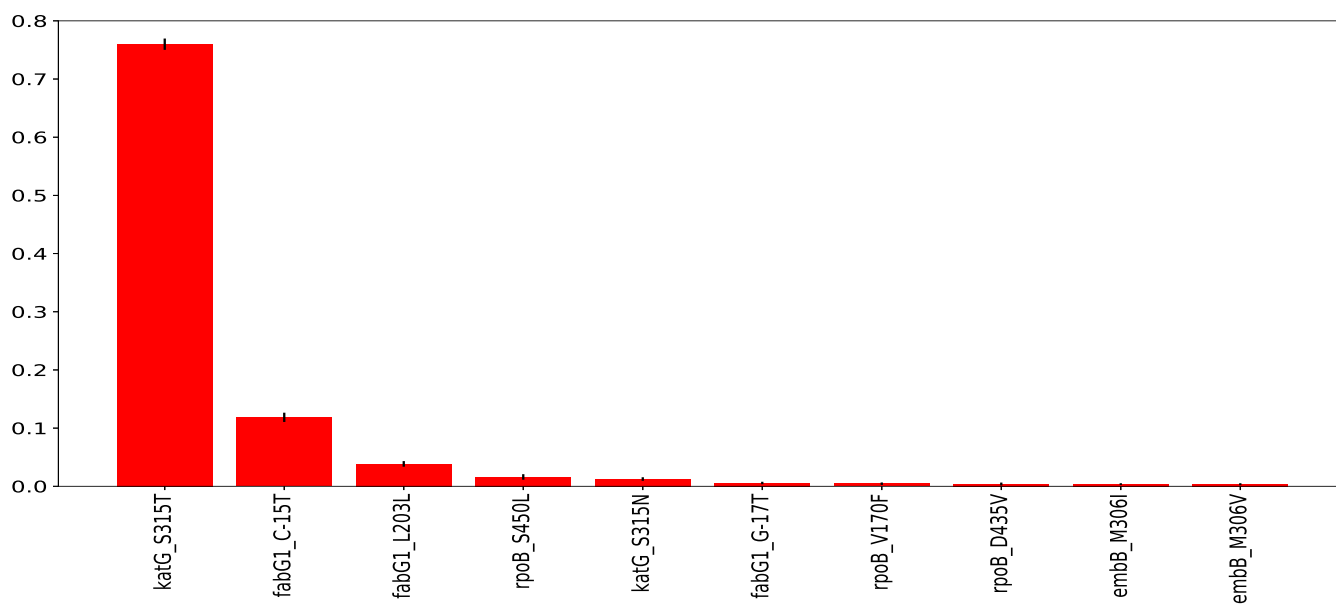

**Figure S20.** The top 10 mutations ranked by SLRF + F3 for INH. *katG\_S315T*, *fabG1\_C-15T*, *fabG1\_L203L*, *KatG\_S315N*, and *fabG1\_G-17T* for INH, *embB\_M306V* and *embB\_M306I* for EMB, and *rpoB\_S450L*, *rpoB\_V170F*, and *rpoB\_D435V* for RIF are known resistance-associated markers.

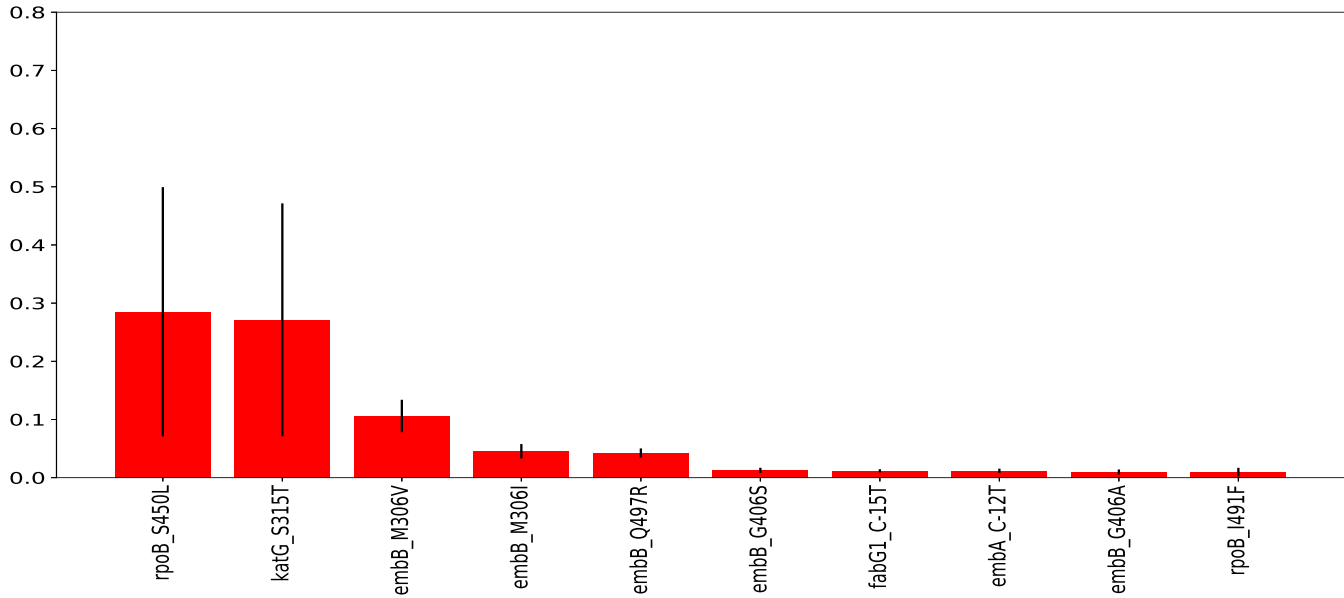

**Figure S21.** The top 10 mutations ranked by SLRF + F3 for EMB. *katG\_S315T* and *fabG1\_C-15T* for INH, *embB\_M306V*, *embB\_M306I*, *embB\_Q497R*, *embB\_G406S*, and *embB\_G406A* for EMB, and *rpoB\_S450L* and *rpoB\_I491F* for RIF are known resistance-associated markers.

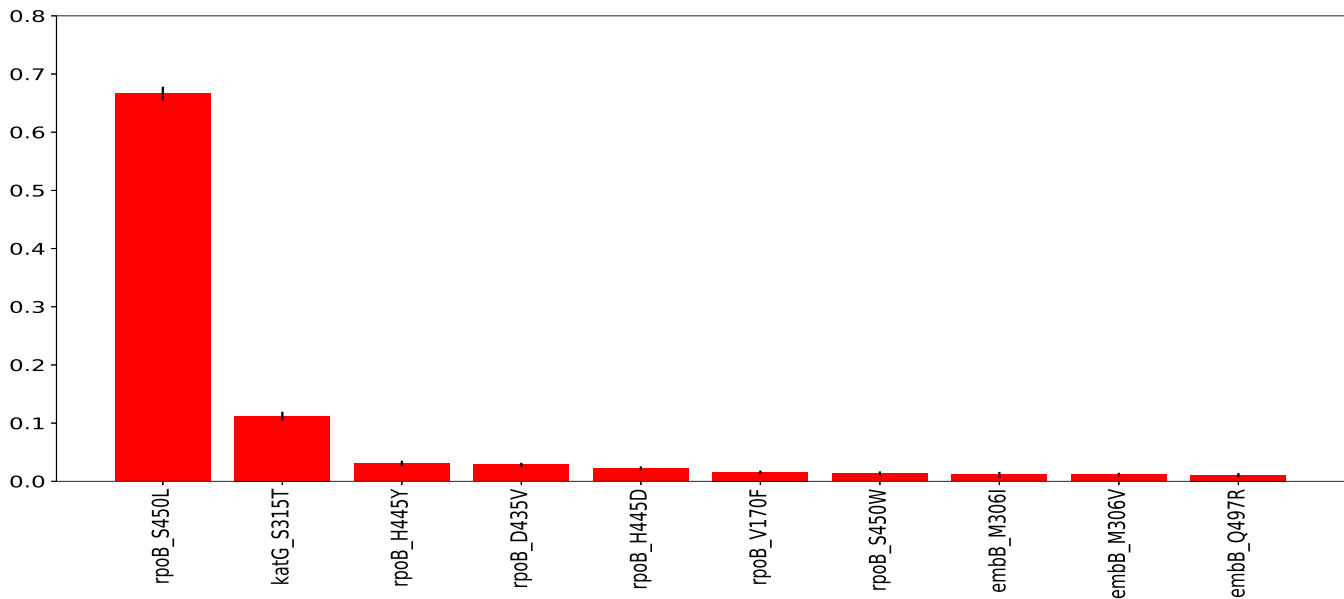

**Figure S22.** The top 10 mutations ranked by SLRF + F3 for RIF. *katG\_S315T* for INH, *embB\_M306V*, *embB\_M306I*, and *embB\_Q497R* for EMB, and *rpoB\_S450L*, *rpoB\_H445Y*, *rpoB\_V170F*, *rpoB\_H445D*, *rpoB\_S450W*, and *rpoB\_D435V* for RIF are known resistance-associated markers.

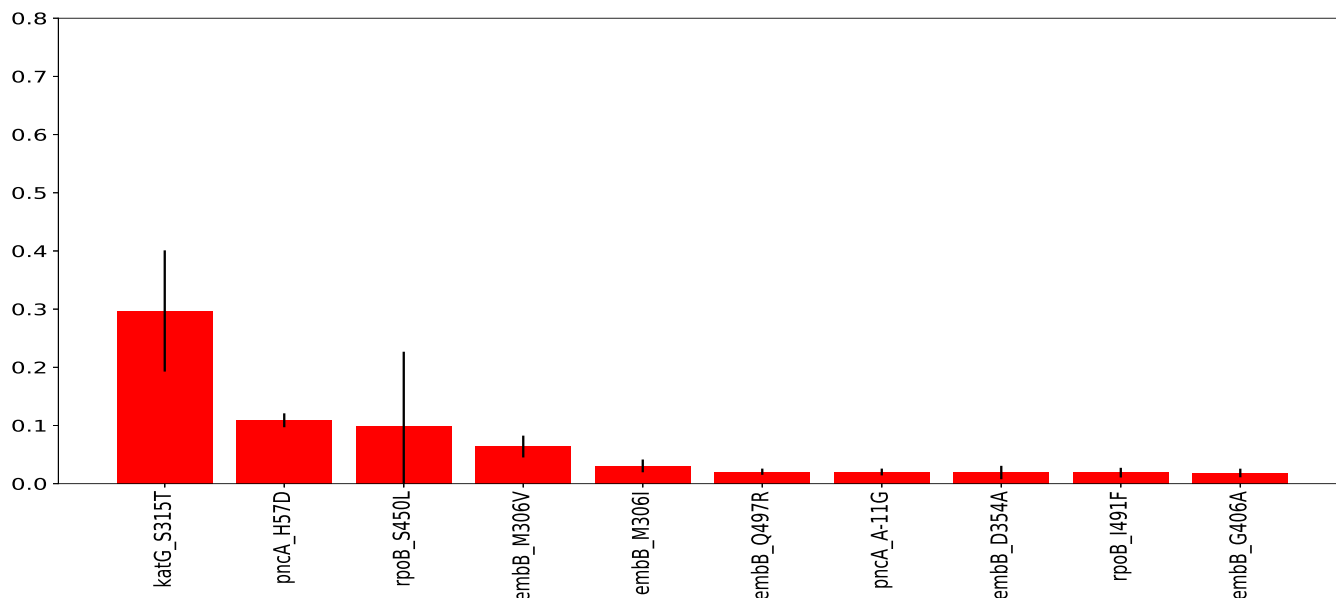

**Figure S23.** The top 10 mutations ranked by SLRF + F3 for PZA. *katG*\_S315T for INH, *embB*\_M306V, *embB*\_M306I, *embB*\_Q497R, *embB*\_D354A, and *embB*\_G406A for EMB, *rpoB*\_S450L and *rpoB*\_I491F for RI, and *pncA*\_H57D and *pncA*\_A-11G for PZA are known resistance-associated markers.

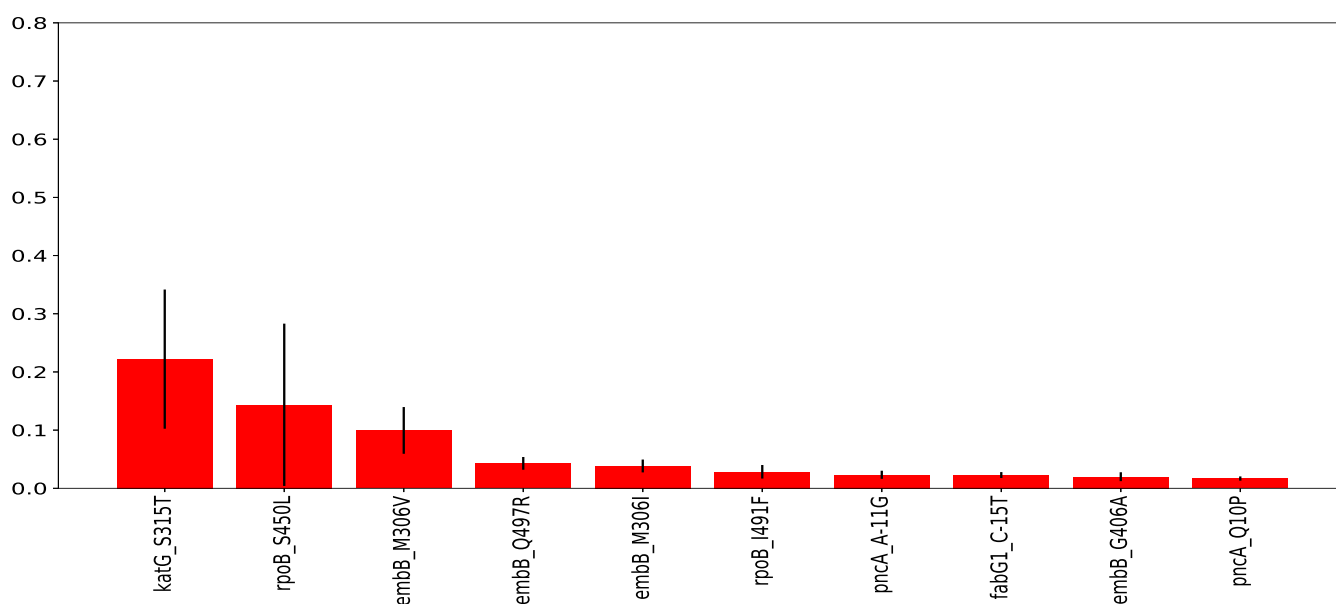

**Figure S24.** The top 10 mutations ranked by SLRF + F3 for FDR. *katG*\_S315T and *fabG1*\_C-15T for INH, *embB*\_M306V, *embB*\_M306I, *embB*\_Q497R, and *embB*\_G406A for EMB, *rpoB*\_S450L and *rpoB*\_I491F for RIF, and *pncA*\_A-11G and *pncA*\_Q10P for PZA are known resistance-associated markers.

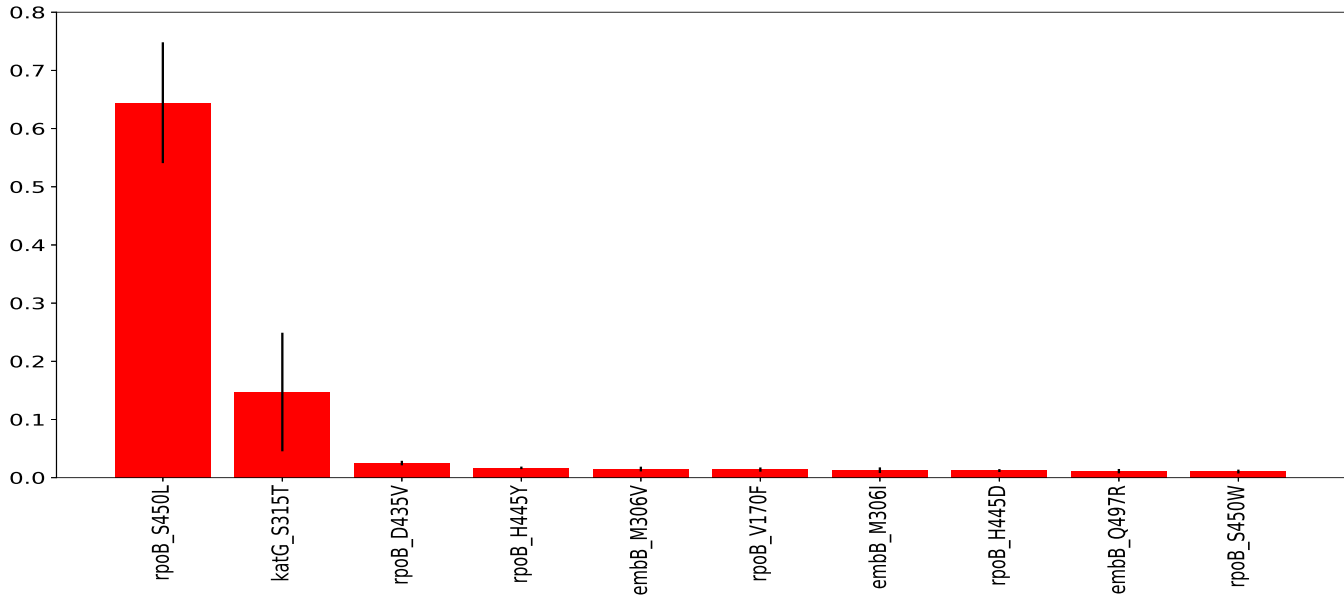

**Figure S25.** The top 10 mutations ranked by SLRF + F3 for MDR. *katG\_S315T* for INH, *embB\_M306V*, *embB\_M306I*, and *embB\_Q497R* for EMB, and *rpoB\_S450L*, *rpoB\_D435V*, *rpoB\_S450W*, *rpoB\_H445Y*, *rpoB\_V170F*, and *rpoB\_H445D* for RIF are known resistance-associated markers.

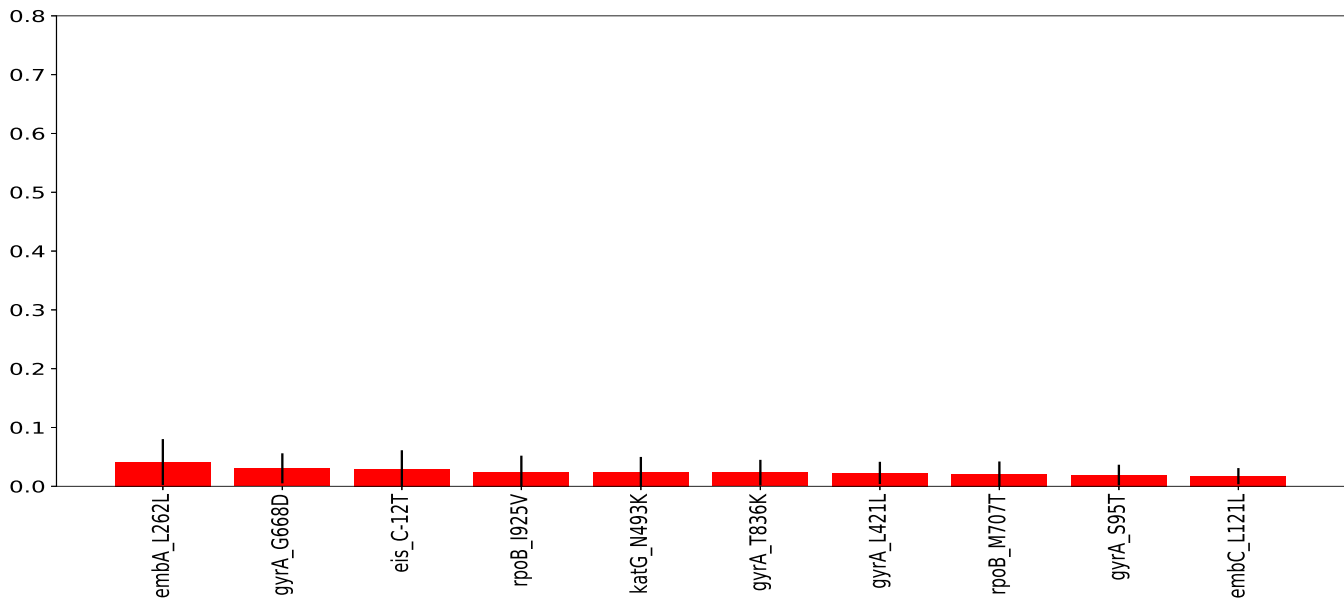

**Figure S26.** The top 10 mutations ranked by MLRF + F4 for all first-line drugs. *gyrA\_G668D* and *gyrA\_S95T* are lineage-defining mutations and *katG\_N493K*, *embC\_L121L*, *rpoB\_M707T*, and *embA\_L262L* are not in the known catalog that can be resistant/susceptible-associated markers.

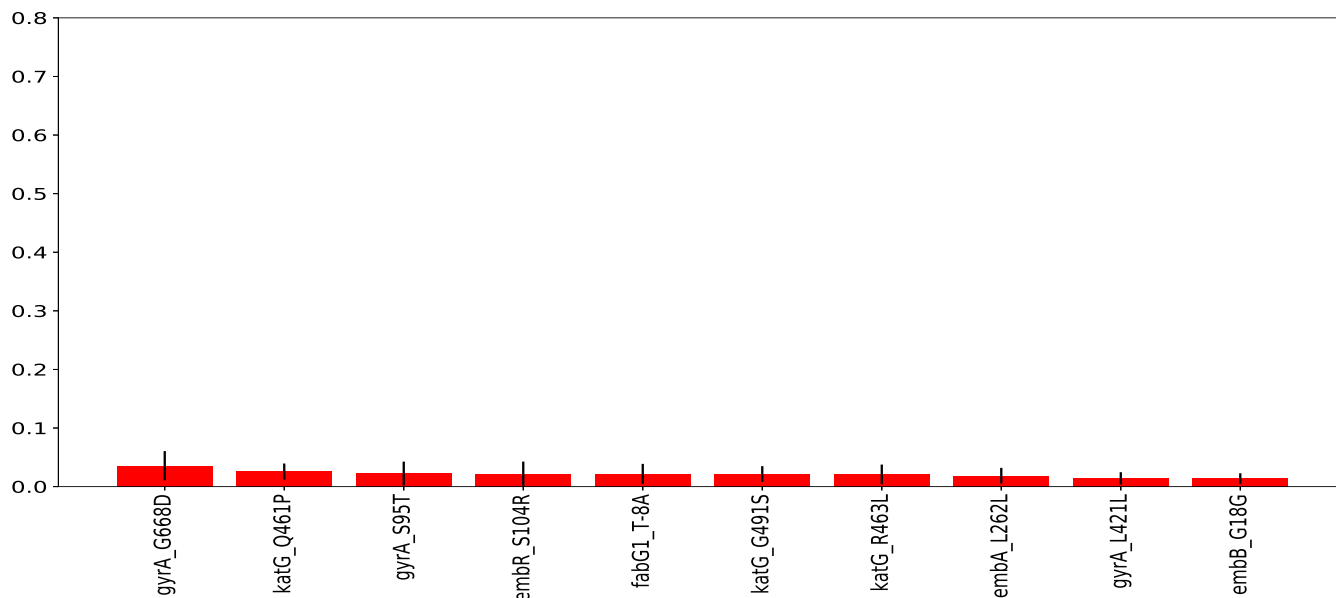

**Figure S27.** The top 10 mutations ranked by SLRF + F4 for INH. *katG\_R463L*, *gyrA\_G668D*, and *gyrA\_S95T* are lineage-defining mutations and *katG\_G491S*, *embR\_S104R*, *embA\_L262L*, and *embB\_G18G* are not in the known catalog and can be resistant/susceptible-associated markers.

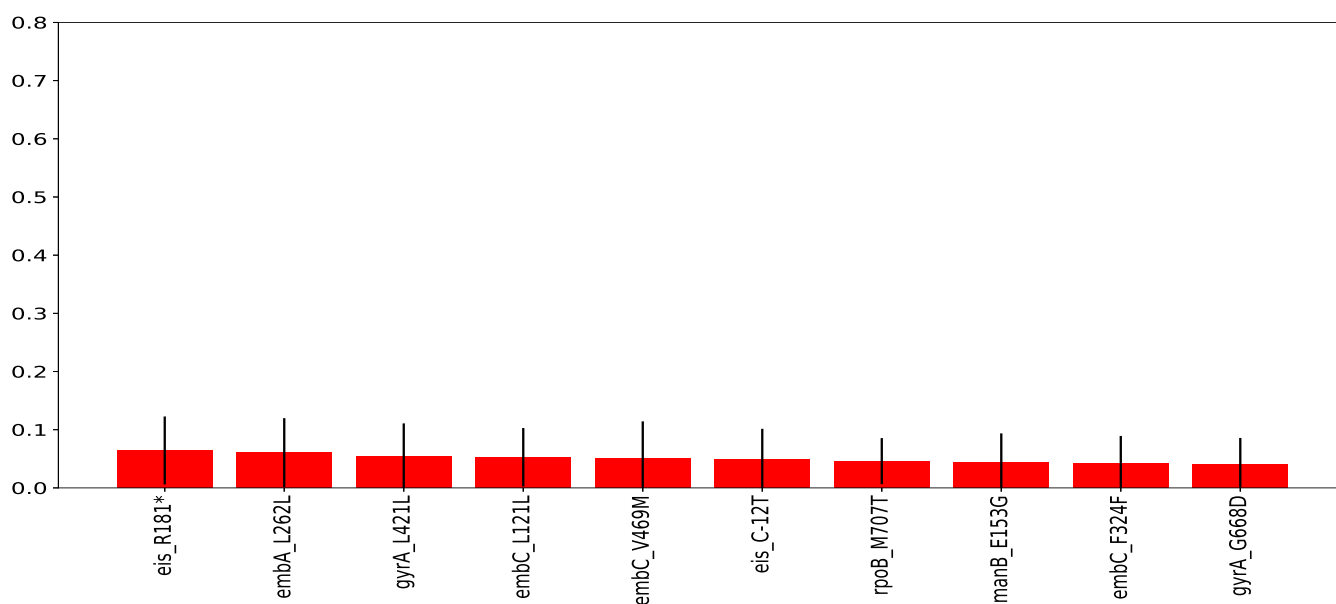

**Figure S28.** The top 10 mutations ranked by SLRF + F4 for EMB. *embC\_V469M*, *embC\_L121L*, *manB\_E153G*, *embC\_F324F*, *rpoB\_M707T*, and *embA\_L262L* are not in the known catalog and can be resistant/susceptible-associated markers. *gyrA\_G668D* is a lineage-defining mutation.

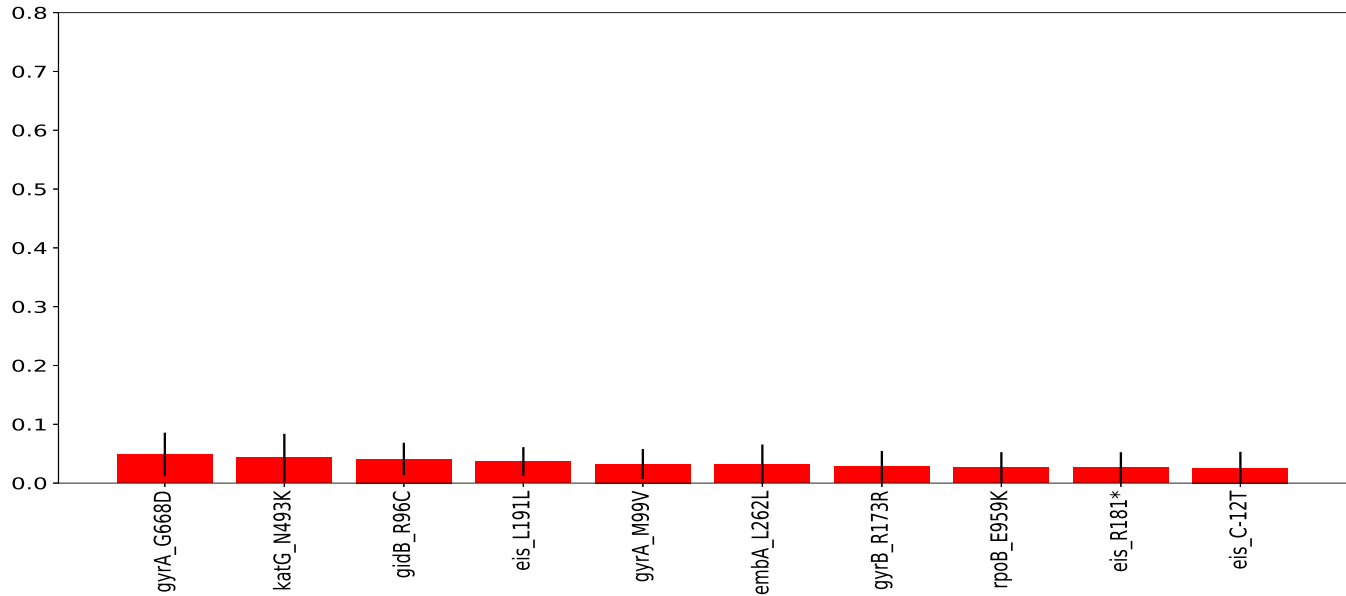

**Figure S29.** The top 10 mutations ranked by SLRF + F4 for RIF. *gyrA*\_G668D is a lineage-defining mutation and *katG*\_N493K, *rpoB*\_E959K, and *embA*\_L262L are not in the known catalog that can be resistant/susceptible-associated markers.

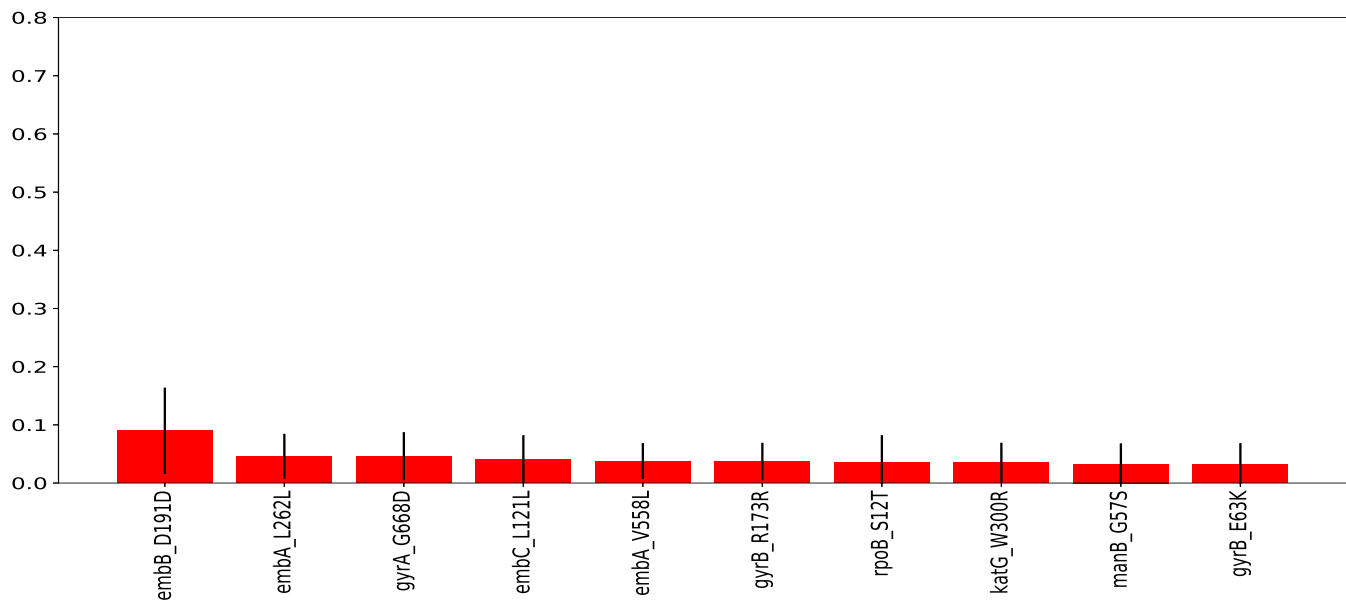

**Figure S30.** The top 10 mutations ranked by SLRF + F4 for PZA. *embB*\_D191D, *embA*\_L262L, *embC*\_L121L, *embA*\_V558L, *katG*\_W300R, and *rpoB*\_S12T are not in the known catalog that can be resistant/susceptible-associated markers. *manB*\_G57S is an EMB susceptible-associated mutation.

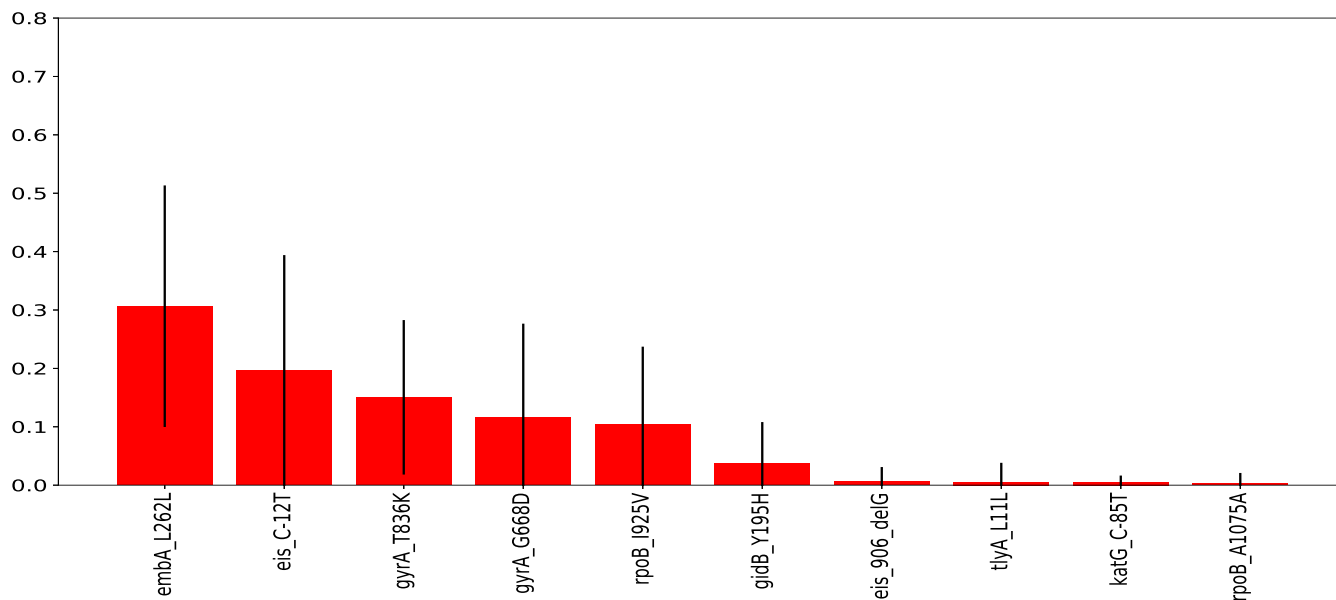

**Figure S31.** The top 10 mutations ranked by SLRF + F4 for FDR. *gyrA\_G668D* is a lineage-defining mutation and *rpoB\_A1075A* and *embA\_L262L* are not in the known catalog and can be resistant/susceptible-associated markers. *katG\_C-85T* is an INH susceptible-associated mutation.

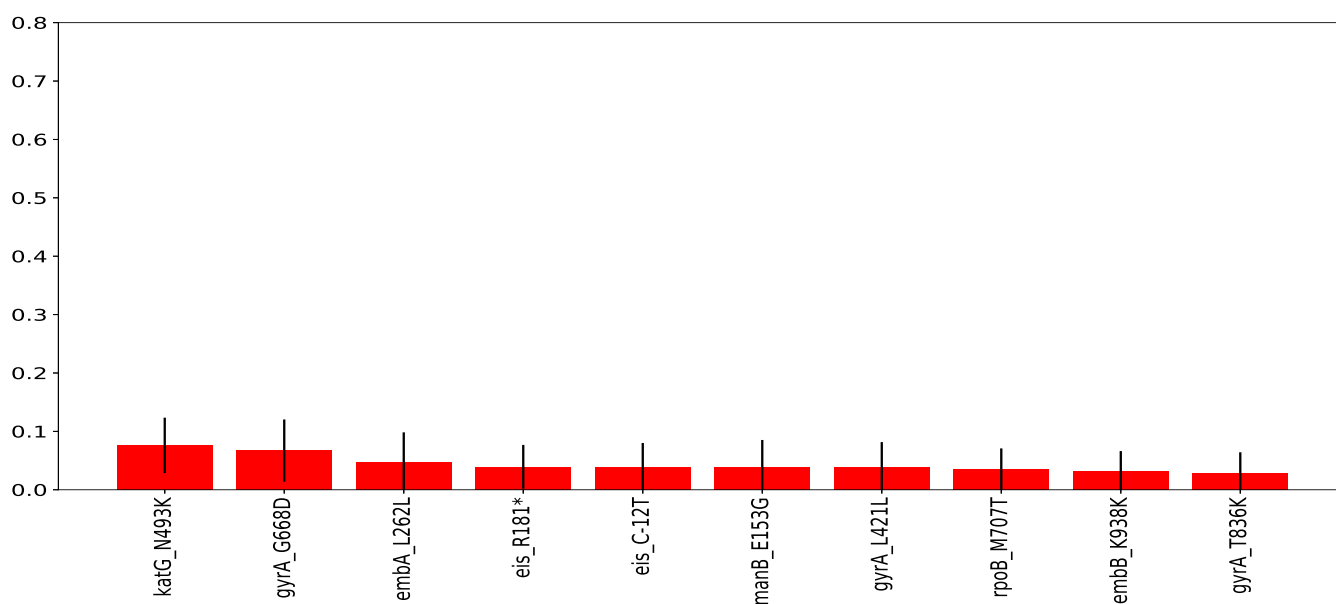

**Figure S32.** The top 10 mutations ranked by SLRF + F4 for MDR. *gyrA\_G668D* is a lineage-defining mutation and *katG\_N493K*, *embB\_K938K*, *embA\_L262L*, *manB\_E153G*, and *rpoB\_M707T* are not in the known catalog that can be resistant/susceptible-associated markers.

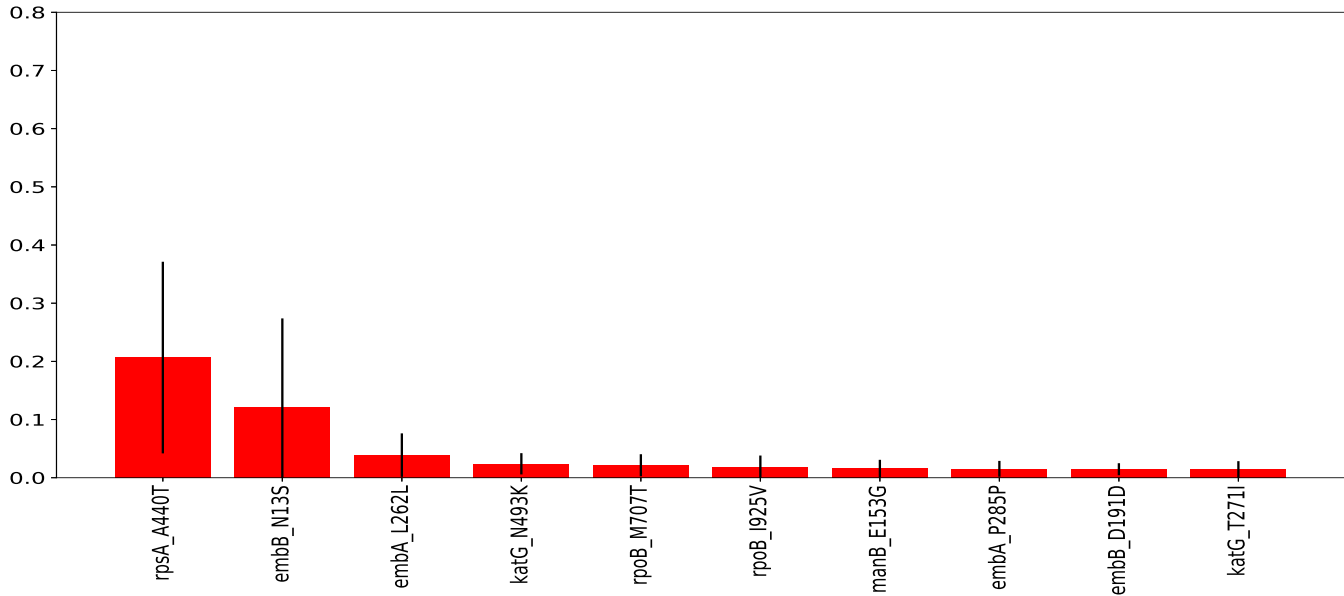

**Figure S33.** The top 10 mutations ranked by MLRF + F5 for all first-line drugs. *rpsA\_A440T* is a lineage-defining mutation and *embB\_N13S* is an EMB susceptible-associated mutation. *embA\_L262L*, *katG\_N493K*, *manB\_E153G*, *embB\_K938K*, *rpoB\_M707T*, *embA\_P285P*, and *embB\_D191D* are not in the known catalog that can be resistant/susceptible-associated markers.

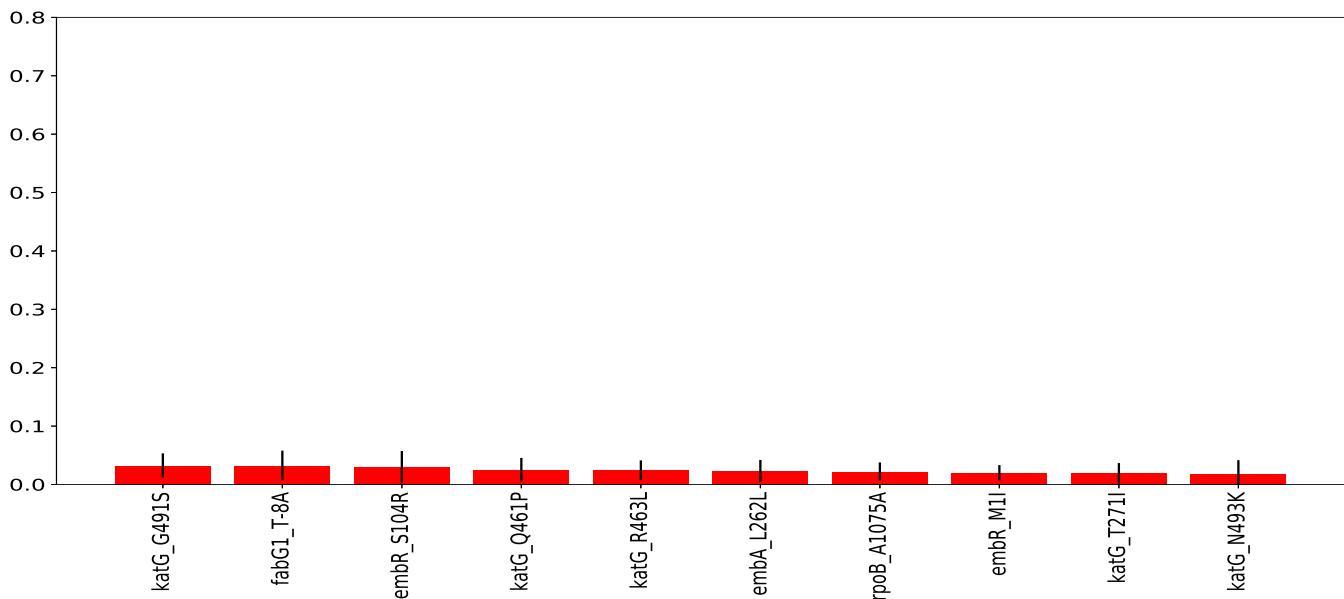

**Figure S34.** The top 10 mutations ranked by SLRF + F5 for INH. *embR\_S104R*, *katG\_G491S*, *embA\_L262L*, *rpoB\_A1075A*, *katG\_N493K* and *embR\_M1I* are not in the known catalog that can be resistant/susceptible-associated markers. *katG\_R463L* is a lineage-defining marker.



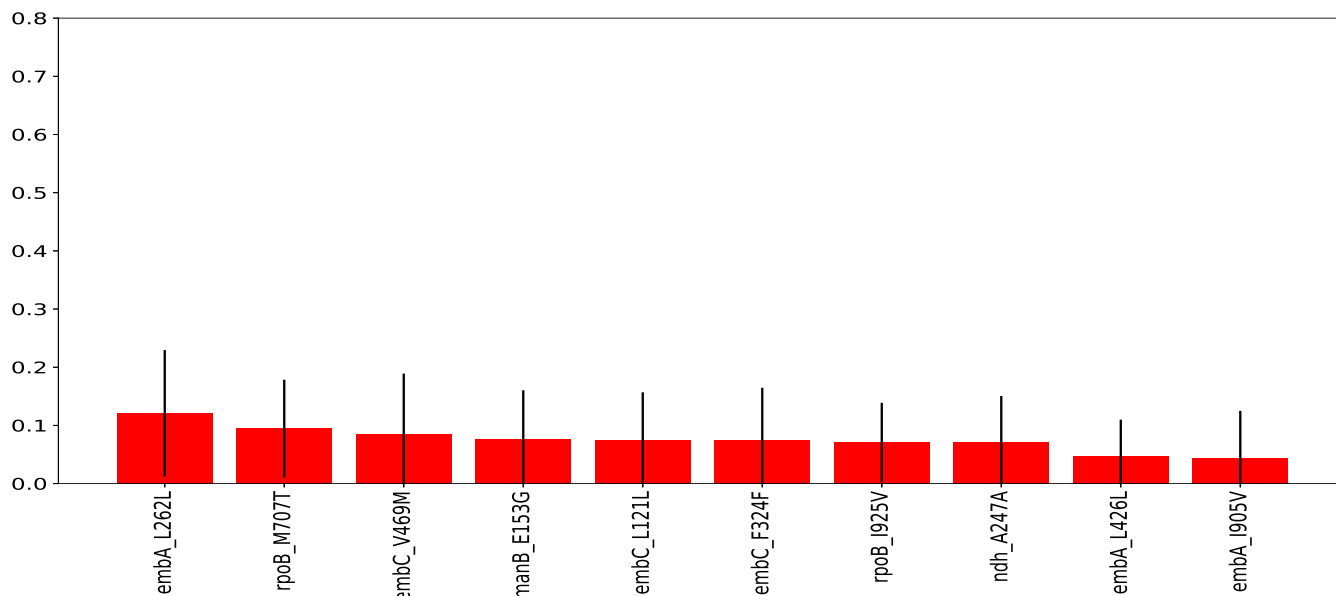

**Figure S35.** The top 10 mutations ranked by SLRF + F5 for EMB. *embA\_L262L*, *embC\_V469M*, *ndh\_A247A*, *rpoB\_M707T*, *embC\_L121L*, *manB\_E153G*, *embC\_F324F*, *embA\_L426L*, and *embA\_I905V* are not in the known catalog that can be resistant/susceptible-associated markers.

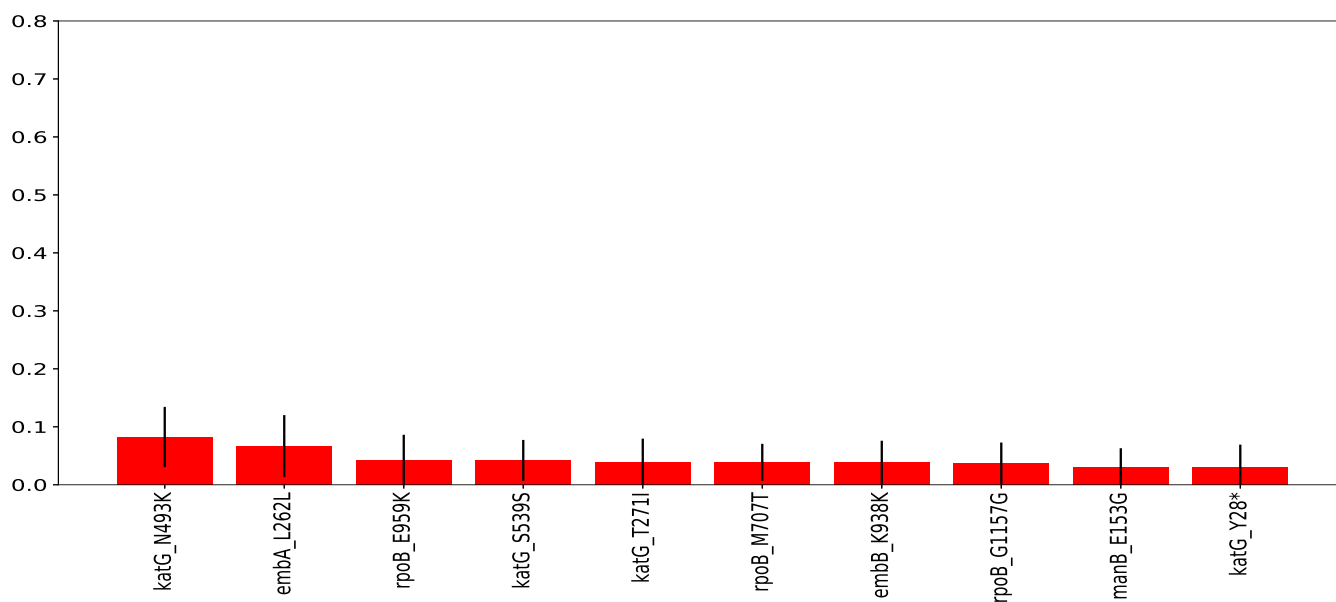

**Figure S36.** The top 10 mutations ranked by SLRF + F5 for RIF. *katG\_N493K*, *embA\_L262L*, *katG\_S539S*, *rpoB\_E959K*, *embB\_K938K*, *manB\_E153G*, *rpoB\_G1157G*, and *rpoB\_M707T* are not in the known catalog that can be resistant/susceptible-associated markers.

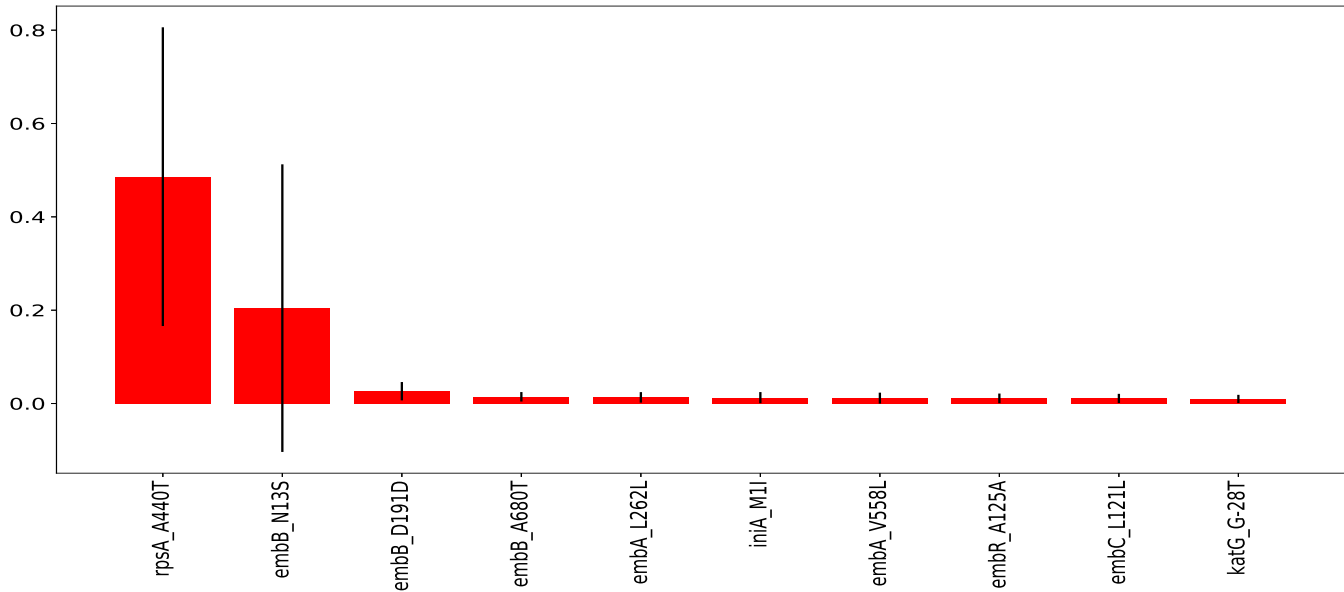

**Figure S37.** The top 10 mutations ranked by SLRF + F5 for PZA. *rpsA\_A440T* is a lineage-defining mutation and *embB\_N13S* and *embB\_A680T* are EMB susceptible-associated mutations. *embB\_D191D*, *embA\_L262L*, *iniA\_M1I*, *embA\_V558L*, *embR\_A125A*, *embC\_L121L*, and *katG\_G-28T* are not in the known catalog that can be resistant/susceptible-associated markers.

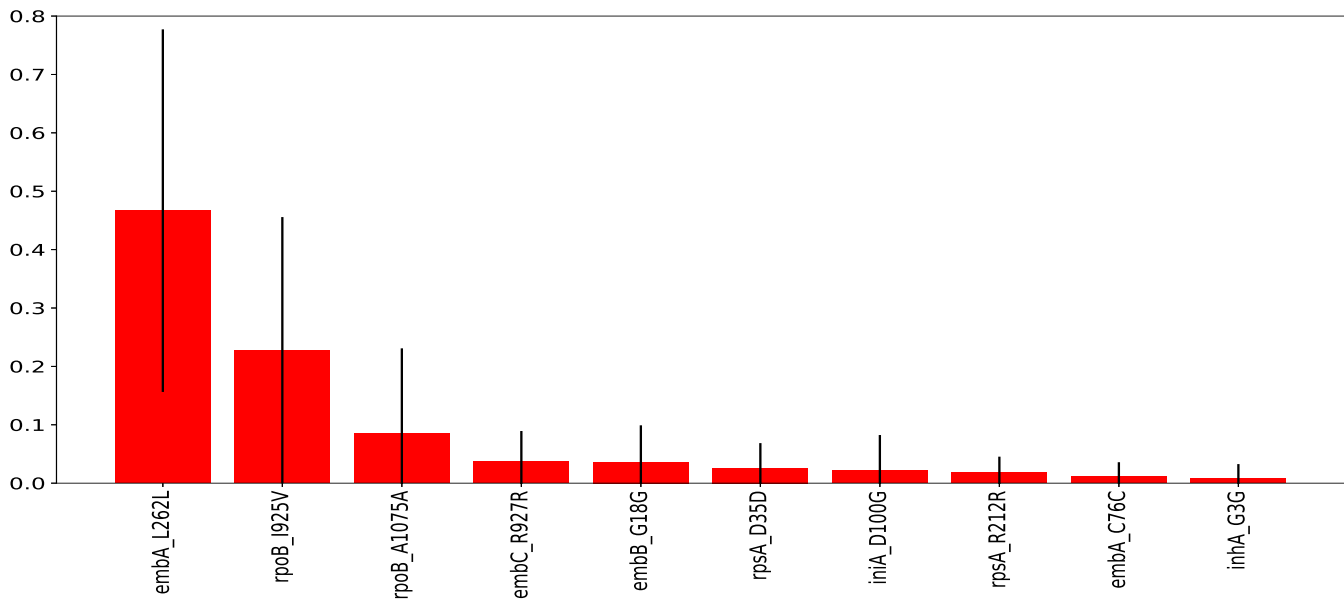

**Figure S38.** The top 10 mutations ranked by SLRF + F5 for FDR. *iniA\_D100G* is an EMB susceptible-associated mutation. *embA\_L262L*, *rpoB\_A1075A*, *embC\_R927R*, *embB\_G18G*, *inhA\_G3G*, *rpsA\_R212R*, *rpsA\_D35D*, and *embA\_C76C* are not in the known catalog that can be resistant/susceptible-associated markers.

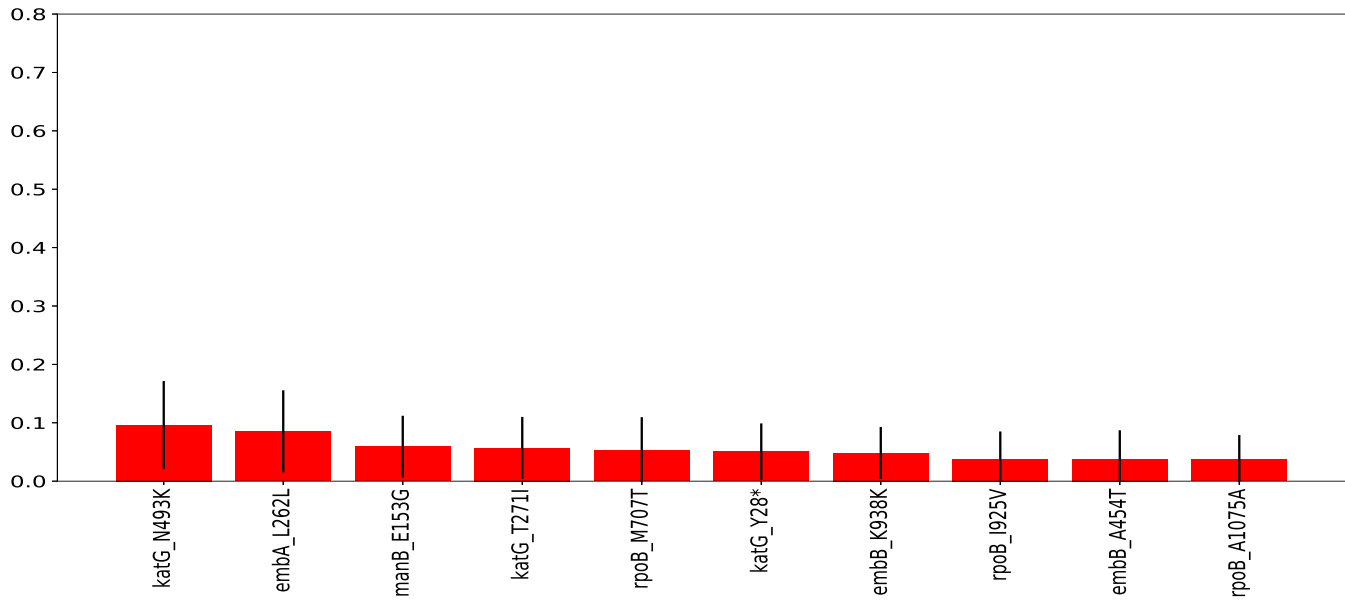

**Figure S39.** The top 10 mutations ranked by SLRF + F5 for MDR. *katG\_N493K*, *embA\_L262L*, *rpoB\_M707T*, *manB\_E153G*, *embB\_K938K*, and *rpoB\_A1075A* are not in the known catalog that can be resistant/susceptible-associated markers. *embB\_A454T* is an EMB susceptible-associated mutation.

## SUPPLEMENTARY E

**Table S11.** The number of mutations with importance of more than 0.05, 0.01, 0.005 and 0.001 ranked by SLRF + F1-F5 feature sets for INH, EMB, RIF, PZA, MDR-TB, and FDR-TB and MLRF + F1-F5 feature sets.

|                   | SLRF |     |     |     |        | MLRF   |           |
|-------------------|------|-----|-----|-----|--------|--------|-----------|
|                   | INH  | EMB | RIF | PZA | FDR-TB | MDR-TB | All drugs |
| Threshold = 0.05  |      |     |     |     |        |        |           |
| F1                | 3    | 2   | 2   | 2   | 3      | 3      | 2         |
| F2                | 3    | 2   | 2   | 2   | 3      | 3      | 2         |
| F3                | 3    | 2   | 2   | 2   | 4      | 3      | 2         |
| F4                | 1    | 12  | 5   | 9   | 5      | 10     | 3         |
| F5                | 4    | 10  | 11  | 2   | 4      | 12     | 3         |
| Threshold = 0.01  |      |     |     |     |        |        |           |
| F1                | 8    | 8   | 5   | 7   | 10     | 13     | 6         |
| F2                | 6    | 8   | 5   | 8   | 13     | 15     | 10        |
| F3                | 9    | 9   | 5   | 9   | 16     | 16     | 10        |
| F4                | 30   | 27  | 32  | 26  | 7      | 25     | 19        |
| F5                | 36   | 19  | 31  | 9   | 9      | 23     | 17        |
| Threshold = 0.005 |      |     |     |     |        |        |           |
| F1                | 14   | 15  | 6   | 12  | 17     | 23     | 12        |
| F2                | 20   | 17  | 5   | 11  | 23     | 24     | 10        |
| F3                | 20   | 17  | 6   | 12  | 24     | 31     | 12        |
| F4                | 71   | 37  | 53  | 42  | 9      | 46     | 45        |
| F5                | 63   | 22  | 50  | 23  | 11     | 27     | 41        |
| Threshold = 0.001 |      |     |     |     |        |        |           |
| F1                | 96   | 59  | 24  | 32  | 143    | 147    | 41        |
| F2                | 93   | 62  | 20  | 37  | 121    | 123    | 43        |
| F3                | 73   | 50  | 16  | 33  | 89     | 83     | 37        |
| F4                | 152  | 50  | 96  | 97  | 23     | 75     | 174       |
| F5                | 110  | 29  | 70  | 57  | 22     | 49     | 120       |

**Table S12.** Comparing the performance of MLRF and SLRF for INH, EMB, RIF, PZA, MDR-TB, and FDR-TB based on important mutations indicated by IF1-IF5 and 0.05 as threshold. "T" added before each feature name denotes that this corresponds to the top important features for the equivalent feature space.

| Feature set | Method | INH           |               |                     | EMB          |               |                     |
|-------------|--------|---------------|---------------|---------------------|--------------|---------------|---------------------|
|             |        | Sensitivity   | Specificity   | AUC                 | Sensitivity  | Specificity   | AUC                 |
| IF1         | MLRF   | 79.89 ± 1.03  | 99.08 ± 0.14  | 89.49 ± 0.55        | 90.80 ± 1.59 | 88.02 ± 0.29  | 89.41 ± 0.87        |
|             | SLRF   | 84.31 ± 1.33  | 99.19 ± 0.14  | 91.74 ± 0.64        | 92.02 ± 1.32 | 87.98 ± 0.34  | <b>89.99 ± 0.67</b> |
| IF2         | MLRF   | 79.89 ± 1.43  | 99.08 ± 0.13  | 89.49 ± 0.73        | 90.80 ± 1.18 | 88.01 ± 0.41  | 89.41 ± 0.66        |
|             | SLRF   | 84.31 ± 1.32  | 99.19 ± 0.20  | 91.75 ± 0.70        | 92.02 ± 1.50 | 87.98 ± 0.29  | 89.99 ± 0.76        |
| IF3         | MLRF   | 79.89 ± 1.33  | 99.08 ± 0.21  | 89.48 ± 0.66        | 90.80 ± 1.74 | 88.02 ± 0.38  | 89.41 ± 0.89        |
|             | SLRF   | 84.31 ± 1.25  | 99.19 ± 0.16  | <b>91.75 ± 0.62</b> | 92.02 ± 1.59 | 87.97 ± 0.44  | 89.99 ± 0.79        |
| IF4         | MLRF   | 0.96 ± 1.40   | 99.99 ± 0.03  | 50.47 ± 0.70        | 3.14 ± 4.63  | 99.99 ± 0.02  | 51.57 ± 2.32        |
|             | SLRF   | 0.00 ± 0.00   | 100.00 ± 0.00 | 50.00 ± 0.00        | 3.66 ± 4.91  | 99.97 ± 0.04  | 51.82 ± 2.46        |
| IF5         | MLRF   | 0.76 ± 1.29   | 99.99 ± 0.03  | 50.37 ± 0.64        | 2.60 ± 4.41  | 99.99 ± 0.03  | 51.29 ± 2.20        |
|             | SLRF   | 3.84 ± 2.31   | 99.96 ± 0.04  | 51.90 ± 1.15        | 2.16 ± 4.34  | 99.95 ± 0.046 | 51.06 ± 2.17        |
| Feature set | Method | RIF           |               |                     | PZA          |               |                     |
|             |        | Sensitivity   | Specificity   | AUC                 | Sensitivity  | Specificity   | AUC                 |
| IF1         | MLRF   | 86.96 ± 1.07  | 94.66 ± 0.28  | 90.81 ± 0.61        | 79.80 ± 1.49 | 86.26 ± 0.29  | 83.03 ± 0.82        |
|             | SLRF   | 86.96 ± 1.38  | 94.66 ± 0.33  | 90.81 ± 0.71        | 84.81 ± 1.86 | 87.35 ± 0.43  | 86.08 ± 0.96        |
| IF2         | MLRF   | 89.64 ± 1.51  | 93.26 ± 0.52  | 91.45 ± 0.73        | 85.05 ± 2.21 | 88.42 ± 0.60  | 86.73 ± 1.01        |
|             | SLRF   | 90.15 ± 1.06  | 92.97 ± 0.45  | <b>91.56 ± 0.49</b> | 85.33 ± 2.24 | 89.01 ± 0.79  | <b>87.17 ± 1.14</b> |
| IF3         | MLRF   | 86.96 ± 1.04  | 94.66 ± 0.36  | 90.81 ± 0.52        | 79.80 ± 1.47 | 86.26 ± 0.37  | 83.03 ± 0.72        |
|             | SLRF   | 86.96 ± 1.36  | 94.66 ± 0.35  | 90.81 ± 0.66        | 86.95 ± 2.27 | 86.26 ± 0.62  | 86.61 ± 1.02        |
| IF4         | MLRF   | 1.54 ± 2.25   | 99.99 ± 0.02  | 50.76 ± 1.12        | 2.07 ± 3.03  | 99.99 ± 0.02  | 51.03 ± 1.52        |
|             | SLRF   | 4.03 ± 3.36   | 99.98 ± 0.04  | 52.00 ± 1.69        | 9.12 ± 5.81  | 99.91 ± 0.07  | 54.51 ± 2.91        |
| IF5         | MLRF   | 1.27 ± 2.15   | 99.99 ± 0.03  | 50.63 ± 1.07        | 47.12 ± 6.32 | 99.92 ± 0.06  | 73.52 ± 3.15        |
|             | SLRF   | 2.07 ± 2.67   | 99.98 ± 0.03  | 51.02 ± 1.33        | 46.62 ± 5.18 | 99.94 ± 0.06  | 73.28 ± 2.59        |
| Feature set | Method | FDR-TB        |               |                     | MDR-TB       |               |                     |
|             |        | Sensitivity   | Specificity   | AUC                 | Sensitivity  | Specificity   | AUC                 |
| IF1         | MLRF   | 93.85 ± 1.80  | 84.21 ± 0.28  | 89.03 ± 0.97        | 90.78 ± 1.05 | 94.27 ± 0.26  | 92.52 ± 0.58        |
|             | SLRF   | 92.79 ± 5.10  | 84.83 ± 1.80  | 88.81 ± 1.73        | 90.78 ± 1.28 | 94.27 ± 0.34  | 92.52 ± 0.67        |
| IF2         | MLRF   | 93.85 ± 1.39  | 84.21 ± 0.39  | <b>89.11 ± 0.76</b> | 90.78 ± 1.11 | 94.27 ± 0.36  | 92.52 ± 0.58        |
|             | SLRF   | 93.31 ± 4.59  | 84.65 ± 1.59  | 88.98 ± 1.59        | 90.78 ± 1.26 | 94.27 ± 0.28  | 92.52 ± 0.63        |
| IF3         | MLRF   | 93.87 ± 1.86  | 84.21 ± 0.38  | 89.03 ± 0.93        | 90.78 ± 1.07 | 94.27 ± 0.36  | <b>92.52 ± 0.53</b> |
|             | SLRF   | 93.59 ± 2.80  | 84.62 ± 1.26  | 89.11 ± 0.97        | 90.78 ± 1.34 | 94.27 ± 0.37  | 92.52 ± 0.65        |
| IF4         | MLRF   | 8.67 ± 12.80  | 99.99 ± 0.02  | 54.33 ± 6.40        | 2.51 ± 3.66  | 99.99 ± 0.02  | 51.25 ± 1.83        |
|             | SLRF   | 10.83 ± 14.65 | 99.98 ± 0.03  | 55.41 ± 7.33        | 5.76 ± 5.78  | 99.98 ± 0.03  | 52.87 ± 2.89        |
| IF5         | MLRF   | 8.00 ± 14.24  | 99.99 ± 0.03  | 53.99 ± 7.12        | 2.05 ± 3.47  | 99.99 ± 0.03  | 51.02 ± 1.73        |
|             | SLRF   | 5.50 ± 11.13  | 99.98 ± 0.03  | 52.74 ± 5.57        | 3.40 ± 4.42  | 99.97 ± 0.03  | 51.67 ± 2.21        |

**Table S13.** Comparing the performance of MLRF and SLRF for INH, EMB, RIF, PZA, MDR-TB, and FDR-TB based on important mutations indicated by IF1-IF5 and 0.01 as threshold. “I” added before each feature name denotes that this corresponds to the top important features for the equivalent feature space.

| Feature set | Method | INH           |              |                     | EMB          |              |                     |
|-------------|--------|---------------|--------------|---------------------|--------------|--------------|---------------------|
|             |        | Sensitivity   | Specificity  | AUC                 | Sensitivity  | Specificity  | AUC                 |
| IF1         | MLRF   | 88.49 ± 1.26  | 98.44 ± 0.24 | 93.46 ± 0.63        | 91.58 ± 3.51 | 88.28 ± 1.78 | 89.93 ± 1.02        |
|             | SLRF   | 90.13 ± 1.05  | 98.68 ± 0.27 | 94.40 ± 0.54        | 90.66 ± 3.69 | 90.37 ± 2.45 | 90.51 ± 0.84        |
| IF2         | MLRF   | 89.09 ± 0.97  | 98.22 ± 0.26 | 93.65 ± 0.52        | 89.98 ± 3.76 | 90.63 ± 2.71 | 90.30 ± 0.79        |
|             | SLRF   | 90.13 ± 1.01  | 98.68 ± 0.23 | 94.40 ± 0.53        | 90.96 ± 3.61 | 89.79 ± 2.49 | 90.37 ± 0.78        |
| IF3         | MLRF   | 89.08 ± 1.07  | 98.21 ± 0.24 | 93.64 ± 0.52        | 89.58 ± 3.64 | 91.19 ± 2.49 | 90.39 ± 0.95        |
|             | SLRF   | 90.13 ± 0.98  | 98.68 ± 0.22 | <b>94.41 ± 0.52</b> | 89.32 ± 2.74 | 92.06 ± 2.10 | <b>90.69 ± 0.89</b> |
| IF4         | MLRF   | 4.01 ± 3.05   | 99.83 ± 0.14 | 51.92 ± 1.53        | 3.69 ± 4.74  | 99.84 ± 0.11 | 51.77 ± 2.37        |
|             | SLRF   | 9.22 ± 3.85   | 99.63 ± 0.16 | 54.42 ± 1.92        | 4.04 ± 5.00  | 99.64 ± 0.18 | 51.84 ± 2.49        |
| IF5         | MLRF   | 3.31 ± 2.55   | 99.86 ± 0.09 | 51.58 ± 1.29        | 1.89 ± 4.06  | 99.82 ± 0.14 | 50.85 ± 2.03        |
|             | SLRF   | 8.92 ± 4.49   | 99.62 ± 0.16 | 54.27 ± 2.24        | 2.12 ± 4.02  | 99.73 ± 0.22 | 50.93 ± 2.02        |
| Feature set | Method | RIF           |              |                     | PZA          |              |                     |
|             |        | Sensitivity   | Specificity  | AUC                 | Sensitivity  | Specificity  | AUC                 |
| IF1         | MLRF   | 90.79 ± 1.41  | 92.64 ± 0.95 | 91.72 ± 0.65        | 81.20 ± 1.48 | 85.98 ± 0.50 | 83.59 ± 0.73        |
|             | SLRF   | 92.10 ± 0.90  | 94.62 ± 0.30 | 93.36 ± 0.47        | 88.57 ± 1.80 | 86.96 ± 0.46 | <b>87.77 ± 0.91</b> |
| IF2         | MLRF   | 91.13 ± 1.21  | 92.90 ± 1.11 | 92.02 ± 0.54        | 81.51 ± 1.42 | 85.93 ± 0.48 | 83.72 ± 0.72        |
|             | SLRF   | 92.44 ± 1.11  | 94.56 ± 0.39 | 93.50 ± 0.59        | 87.69 ± 2.15 | 86.00 ± 0.65 | 86.85 ± 1.03        |
| IF3         | MLRF   | 91.11 ± 1.52  | 92.86 ± 1.09 | 91.98 ± 0.60        | 88.47 ± 1.88 | 85.99 ± 0.58 | 87.23 ± 0.93        |
|             | SLRF   | 93.12 ± 0.96  | 94.20 ± 0.36 | <b>93.66 ± 0.53</b> | 85.15 ± 2.75 | 89.11 ± 2.22 | 87.13 ± 0.87        |
| IF4         | MLRF   | 5.53 ± 4.16   | 99.82 ± 0.12 | 52.67 ± 2.10        | 10.42 ± 7.23 | 99.88 ± 0.10 | 55.15 ± 3.62        |
|             | SLRF   | 6.57 ± 5.32   | 99.83 ± 0.11 | 53.20 ± 2.66        | 12.22 ± 7.82 | 99.81 ± 0.11 | 56.01 ± 3.92        |
| IF5         | MLRF   | 3.06 ± 3.27   | 99.82 ± 0.12 | 51.44 ± 1.64        | 50.46 ± 6.02 | 99.76 ± 0.11 | 75.11 ± 3.02        |
|             | SLRF   | 2.04 ± 2.60   | 99.78 ± 0.14 | 50.91 ± 1.30        | 52.84 ± 6.69 | 99.84 ± 0.08 | 76.34 ± 3.34        |
| Feature set | Method | FDR-TB        |              |                     | MDR-TB       |              |                     |
|             |        | Sensitivity   | Specificity  | AUC                 | Sensitivity  | Specificity  | AUC                 |
| IF1         | MLRF   | 86.81 ± 2.76  | 90.29 ± 0.46 | 88.55 ± 1.37        | 92.92 ± 1.44 | 93.36 ± 1.13 | 93.14 ± 0.63        |
|             | SLRF   | 88.09 ± 3.35  | 90.93 ± 0.87 | 89.51 ± 1.42        | 93.66 ± 1.06 | 93.86 ± 0.35 | 93.76 ± 0.56        |
| IF2         | MLRF   | 89.61 ± 2.06  | 90.05 ± 0.54 | 89.83 ± 0.97        | 93.13 ± 1.08 | 93.57 ± 0.73 | 93.35 ± 0.53        |
|             | SLRF   | 89.05 ± 3.14  | 91.37 ± 0.83 | 90.21 ± 1.27        | 95.14 ± 1.21 | 93.41 ± 0.40 | 94.28 ± 0.60        |
| IF3         | MLRF   | 89.81 ± 2.67  | 90.03 ± 0.46 | 89.92 ± 1.28        | 93.08 ± 1.32 | 93.47 ± 0.93 | 93.27 ± 0.61        |
|             | SLRF   | 91.74 ± 3.37  | 90.06 ± 0.61 | <b>90.90 ± 1.56</b> | 95.22 ± 0.89 | 93.39 ± 0.31 | <b>94.31 ± 0.46</b> |
| IF4         | MLRF   | 10.50 ± 13.62 | 99.95 ± 0.05 | 55.23 ± 6.81        | 7.72 ± 6.61  | 99.90 ± 0.07 | 53.81 ± 3.32        |
|             | SLRF   | 9.67 ± 13.68  | 99.97 ± 0.03 | 54.82 ± 6.84        | 5.98 ± 5.40  | 99.85 ± 0.10 | 52.91 ± 2.70        |
| IF5         | MLRF   | 5.00 ± 11.18  | 99.92 ± 0.07 | 52.46 ± 5.59        | 4.96 ± 5.37  | 99.88 ± 0.09 | 52.42 ± 2.69        |
|             | SLRF   | 5.67 ± 11.48  | 99.94 ± 0.07 | 52.80 ± 5.74        | 3.60 ± 4.70  | 99.76 ± 0.16 | 51.68 ± 2.35        |

**Table S14.** Comparing the performance of MLRF and SLRF for INH, EMB, RIF, PZA, MDR-TB, and FDR-TB based on important mutations indicated by IF1-IF5 and 0.005 as threshold. “T” added before each feature name denotes that this corresponds to the top important features for the equivalent feature space.

| Feature set | Method | INH          |              |                     | EMB          |              |                     |
|-------------|--------|--------------|--------------|---------------------|--------------|--------------|---------------------|
|             |        | Sensitivity  | Specificity  | AUC                 | Sensitivity  | Specificity  | AUC                 |
| IF1         | MLRF   | 91.88 ± 1.31 | 97.21 ± 0.41 | 94.55 ± 0.64        | 90.98 ± 1.59 | 91.20 ± 0.50 | 91.09 ± 0.73        |
|             | SLRF   | 90.57 ± 1.19 | 98.67 ± 0.19 | 94.62 ± 0.58        | 90.97 ± 2.01 | 91.78 ± 0.66 | 91.37 ± 0.95        |
| IF2         | MLRF   | 91.93 ± 0.98 | 98.04 ± 0.33 | 94.99 ± 0.50        | 89.55 ± 2.93 | 90.90 ± 2.06 | 90.23 ± 0.87        |
|             | SLRF   | 90.13 ± 1.26 | 98.68 ± 0.22 | 94.40 ± 0.64        | 91.12 ± 1.50 | 92.02 ± 0.92 | 91.57 ± 0.74        |
| IF3         | MLRF   | 91.98 ± 1.08 | 98.06 ± 0.27 | <b>95.02 ± 0.50</b> | 89.58 ± 2.44 | 91.45 ± 1.75 | 90.51 ± 0.79        |
|             | SLRF   | 90.57 ± 1.20 | 98.67 ± 0.26 | 94.62 ± 0.61        | 91.10 ± 1.76 | 92.70 ± 0.51 | <b>91.90 ± 0.82</b> |
| IF4         | MLRF   | 11.34 ± 4.74 | 99.43 ± 0.24 | 55.38 ± 2.36        | 3.52 ± 4.95  | 99.82 ± 0.14 | 51.67 ± 2.48        |
|             | SLRF   | 10.67 ± 4.58 | 99.40 ± 0.24 | 55.03 ± 2.27        | 4.43 ± 5.66  | 99.66 ± 0.18 | 52.04 ± 2.82        |
| IF5         | MLRF   | 8.84 ± 5.69  | 99.62 ± 0.12 | 54.23 ± 2.83        | 2.27 ± 4.31  | 99.85 ± 0.13 | 51.06 ± 2.15        |
|             | SLRF   | 9.51 ± 4.10  | 99.56 ± 0.16 | 54.53 ± 2.04        | 3.16 ± 4.65  | 99.70 ± 0.24 | 51.43 ± 2.35        |
| Feature set | Method | RIF          |              |                     | PZA          |              |                     |
|             |        | Sensitivity  | Specificity  | AUC                 | Sensitivity  | Specificity  | AUC                 |
| IF1         | MLRF   | 92.33 ± 1.04 | 94.20 ± 0.47 | 93.26 ± 0.51        | 84.84 ± 2.23 | 89.40 ± 0.91 | 87.12 ± 1.00        |
|             | SLRF   | 93.14 ± 1.25 | 94.20 ± 0.39 | 93.67 ± 0.62        | 85.45 ± 1.90 | 89.57 ± 1.91 | 87.51 ± 0.85        |
| IF2         | MLRF   | 92.85 ± 1.18 | 94.23 ± 0.33 | 93.54 ± 0.59        | 85.86 ± 2.30 | 87.13 ± 0.97 | 86.50 ± 0.95        |
|             | SLRF   | 93.14 ± 1.03 | 94.19 ± 0.39 | 93.66 ± 0.52        | 84.91 ± 2.00 | 89.39 ± 0.80 | 87.15 ± 0.92        |
| IF3         | MLRF   | 92.93 ± 0.86 | 94.23 ± 0.34 | <b>93.68 ± 0.46</b> | 86.06 ± 2.57 | 87.27 ± 1.83 | 86.67 ± 0.89        |
|             | SLRF   | 93.06 ± 1.19 | 94.24 ± 0.38 | 93.65 ± 0.64        | 84.72 ± 1.64 | 90.69 ± 0.88 | <b>87.71 ± 0.74</b> |
| IF4         | MLRF   | 8.98 ± 4.87  | 99.65 ± 0.20 | 54.32 ± 2.42        | 11.90 ± 7.67 | 99.78 ± 0.15 | 55.84 ± 3.84        |
|             | SLRF   | 8.83 ± 6.08  | 99.29 ± 0.32 | 54.06 ± 3.01        | 11.26 ± 7.69 | 99.68 ± 0.14 | 55.47 ± 3.86        |
| IF5         | MLRF   | 2.41 ± 2.94  | 99.80 ± 0.11 | 51.10 ± 1.45        | 51.72 ± 4.33 | 99.70 ± 0.18 | 75.71 ± 2.19        |
|             | SLRF   | 3.66 ± 3.90  | 99.33 ± 0.29 | 51.49 ± 1.93        | 54.09 ± 6.79 | 99.79 ± 0.12 | 76.94 ± 3.38        |
| Feature set | Method | FDR-TB       |              |                     | MDR-TB       |              |                     |
|             |        | Sensitivity  | Specificity  | AUC                 | Sensitivity  | Specificity  | AUC                 |
| IF1         | MLRF   | 90.20 ± 3.36 | 90.33 ± 0.98 | 90.26 ± 1.39        | 94.19 ± 1.01 | 93.69 ± 0.47 | 93.94 ± 0.44        |
|             | SLRF   | 86.06 ± 3.57 | 92.81 ± 1.21 | 89.44 ± 1.48        | 95.18 ± 1.27 | 93.38 ± 0.43 | 94.28 ± 0.61        |
| IF2         | MLRF   | 88.25 ± 2.61 | 91.33 ± 0.76 | 89.79 ± 1.19        | 94.82 ± 1.15 | 93.72 ± 0.64 | 94.27 ± 0.59        |
|             | SLRF   | 87.95 ± 2.70 | 92.69 ± 0.58 | 90.32 ± 1.26        | 95.23 ± 0.90 | 93.38 ± 0.41 | 94.30 ± 0.46        |
| IF3         | MLRF   | 89.41 ± 3.48 | 90.37 ± 0.97 | 89.89 ± 1.40        | 94.97 ± 0.90 | 93.69 ± 0.36 | <b>94.37 ± 0.47</b> |
|             | SLRF   | 89.28 ± 3.47 | 91.50 ± 1.11 | <b>90.39 ± 1.43</b> | 95.01 ± 1.09 | 93.73 ± 0.37 | 94.37 ± 0.57        |
| IF4         | MLRF   | 9.83 ± 13.91 | 99.96 ± 0.04 | 54.90 ± 6.96        | 9.23 ± 7.14  | 99.79 ± 0.15 | 54.51 ± 3.57        |
|             | SLRF   | 9.83 ± 13.30 | 99.96 ± 0.04 | 54.90 ± 6.65        | 8.11 ± 6.58  | 99.65 ± 0.18 | 53.88 ± 3.27        |
| IF5         | MLRF   | 6.50 ± 12.72 | 99.93 ± 0.07 | 53.22 ± 6.35        | 3.90 ± 4.78  | 99.85 ± 0.10 | 51.88 ± 2.38        |
|             | SLRF   | 8.00 ± 13.33 | 99.92 ± 0.07 | 53.96 ± 6.67        | 5.16 ± 5.80  | 99.75 ± 0.17 | 52.45 ± 2.90        |

**Table S15.** Comparing the performance of MLRF and SLRF for INH, EMB, RIF, PZA, MDR-TB, and FDR-TB based on important mutations indicated by IF1-IF5 and 0.001 as threshold. "I" added before each feature name denotes that this corresponds to the top important features for the equivalent feature space.

| Feature set | Method | INH           |              |                     | EMB          |              |                     |
|-------------|--------|---------------|--------------|---------------------|--------------|--------------|---------------------|
|             |        | Sensitivity   | Specificity  | AUC                 | Sensitivity  | Specificity  | AUC                 |
| IF1         | MLRF   | 92.87 ± 1.06  | 97.56 ± 0.34 | 95.22 ± 0.54        | 89.11 ± 2.29 | 92.59 ± 0.44 | 90.85 ± 1.10        |
|             | SLRF   | 93.07 ± 1.04  | 97.59 ± 0.44 | 95.33 ± 0.46        | 90.53 ± 1.66 | 92.90 ± 0.55 | <b>91.71 ± 0.80</b> |
| IF2         | MLRF   | 92.96 ± 0.83  | 97.64 ± 0.52 | 95.30 ± 0.48        | 89.24 ± 1.80 | 92.34 ± 0.55 | 90.79 ± 0.87        |
|             | SLRF   | 92.78 ± 1.21  | 98.02 ± 0.30 | 95.40 ± 0.59        | 90.51 ± 1.88 | 92.49 ± 0.47 | 91.50 ± 0.90        |
| IF3         | MLRF   | 92.88 ± 0.93  | 97.88 ± 0.31 | <b>95.48 ± 0.40</b> | 89.34 ± 2.02 | 92.38 ± 0.54 | 90.86 ± 0.94        |
|             | SLRF   | 92.80 ± 0.85  | 98.16 ± 0.30 | 95.48 ± 0.45        | 90.26 ± 1.86 | 92.78 ± 0.36 | 91.52 ± 0.89        |
| IF4         | MLRF   | 12.51 ± 4.88  | 98.68 ± 0.43 | 55.60 ± 2.38        | 4.14 ± 5.29  | 99.57 ± 0.29 | 51.85 ± 2.67        |
|             | SLRF   | 12.50 ± 4.90  | 98.68 ± 0.42 | 55.59 ± 2.42        | 3.88 ± 5.32  | 99.58 ± 0.23 | 51.73 ± 2.65        |
| IF5         | MLRF   | 10.56 ± 4.31  | 99.24 ± 0.26 | 54.90 ± 2.15        | 3.22 ± 5.13  | 99.67 ± 0.20 | 51.45 ± 2.53        |
|             | SLRF   | 3.48 ± 4.88   | 99.77 ± 0.18 | 51.62 ± 2.43        | 10.46 ± 3.89 | 98.78 ± 0.33 | 54.62 ± 1.94        |
| Feature set | Method | RIF           |              |                     | PZA          |              |                     |
|             |        | Sensitivity   | Specificity  | AUC                 | Sensitivity  | Specificity  | AUC                 |
| IF1         | MLRF   | 92.19 ± 1.10  | 97.77 ± 0.52 | <b>94.98 ± 0.53</b> | 82.36 ± 2.16 | 91.77 ± 0.61 | 87.06 ± 1.10        |
|             | SLRF   | 92.29 ± 1.36  | 96.61 ± 0.54 | 94.45 ± 0.61        | 84.73 ± 2.49 | 92.83 ± 0.52 | <b>88.78 ± 1.17</b> |
| IF2         | MLRF   | 92.38 ± 1.10  | 96.35 ± 0.48 | 94.37 ± 0.56        | 83.32 ± 2.62 | 89.86 ± 0.60 | 86.59 ± 1.28        |
|             | SLRF   | 92.47 ± 1.19  | 96.45 ± 0.69 | 94.46 ± 0.60        | 84.31 ± 2.13 | 90.40 ± 0.77 | 87.35 ± 0.98        |
| IF3         | MLRF   | 91.31 ± 1.48  | 97.42 ± 1.56 | 94.37 ± 0.67        | 83.00 ± 2.33 | 90.74 ± 0.58 | 86.87 ± 1.05        |
|             | SLRF   | 91.67 ± 1.12  | 98.19 ± 0.63 | 94.93 ± 0.54        | 83.92 ± 2.24 | 91.31 ± 0.36 | 87.61 ± 1.11        |
| IF4         | MLRF   | 8.42 ± 5.63   | 99.09 ± 0.35 | 53.75 ± 2.85        | 11.16 ± 6.29 | 99.47 ± 0.28 | 55.31 ± 3.12        |
|             | SLRF   | 8.13 ± 4.96   | 98.99 ± 0.37 | 53.56 ± 2.52        | 11.22 ± 6.74 | 99.32 ± 0.30 | 55.27 ± 3.35        |
| IF5         | MLRF   | 2.61 ± 2.94   | 99.58 ± 0.22 | 51.09 ± 1.47        | 53.35 ± 5.76 | 99.49 ± 0.20 | 76.42 ± 2.86        |
|             | SLRF   | 2.99 ± 2.87   | 99.18 ± 0.37 | 51.08 ± 1.47        | 53.67 ± 6.54 | 99.49 ± 0.17 | 76.58 ± 3.27        |
| Feature set | Method | FDR-TB        |              |                     | MDR-TB       |              |                     |
|             |        | Sensitivity   | Specificity  | AUC                 | Sensitivity  | Specificity  | AUC                 |
| IF1         | MLRF   | 85.16 ± 2.82  | 93.19 ± 0.42 | 89.18 ± 1.37        | 93.76 ± 1.33 | 97.38 ± 0.49 | <b>95.47 ± 0.62</b> |
|             | SLRF   | 84.60 ± 3.95  | 94.03 ± 0.50 | 89.31 ± 1.93        | 93.43 ± 1.26 | 97.40 ± 0.46 | 95.41 ± 0.60        |
| IF2         | MLRF   | 85.51 ± 2.81  | 92.97 ± 0.50 | 89.24 ± 1.33        | 93.90 ± 1.09 | 96.00 ± 0.39 | 94.95 ± 0.53        |
|             | SLRF   | 84.96 ± 2.81  | 93.61 ± 0.45 | 89.29 ± 1.38        | 93.76 ± 1.38 | 95.93 ± 0.67 | 94.85 ± 0.66        |
| IF3         | MLRF   | 86.85 ± 2.72  | 92.34 ± 0.70 | <b>89.60 ± 1.26</b> | 92.82 ± 1.63 | 96.93 ± 1.51 | 94.88 ± 0.62        |
|             | SLRF   | 85.76 ± 3.59  | 92.58 ± 0.98 | 89.17 ± 1.47        | 93.08 ± 1.24 | 97.67 ± 0.64 | 95.37 ± 0.61        |
| IF4         | MLRF   | 11.17 ± 14.49 | 99.95 ± 0.06 | 55.56 ± 7.25        | 8.06 ± 7.29  | 99.59 ± 0.22 | 53.82 ± 3.66        |
|             | SLRF   | 9.17 ± 13.57  | 99.95 ± 0.04 | 54.56 ± 6.78        | 8.97 ± 7.65  | 99.62 ± 0.20 | 54.30 ± 3.81        |
| IF5         | MLRF   | 7.67 ± 13.42  | 99.93 ± 0.07 | 53.80 ± 6.71        | 4.27 ± 4.82  | 99.71 ± 0.19 | 51.99 ± 2.41        |
|             | SLRF   | 8.50 ± 14.09  | 99.95 ± 0.06 | 54.22 ± 7.05        | 5.16 ± 4.80  | 99.67 ± 0.22 | 52.42 ± 2.40        |



## SUPPLEMENTARY F

Considering top-ranked mutations that were not in the library or known as lineage-defining, we calculated the number of their appearance in each isolate and lineage. We also included the number of isolates having a known resistant-associated mutation in addition to the given mutation. Such analysis can further filter out mutations that are lineage-associated and have a refined list of possible new mutations. Only mutations appeared in more than a lineage is shown in Table S16.

**Table S16.** List of unknown mutations, their number of appearance in isolates, their appearance in resistant isolates for each drug (INH, EMB, RIF and PZA respectively), the number of their joint appearance with a known resistant-associated mutation, their associated lineage, and the method they ranked by.

| Variants           | Lineage                              | Appearance | Appearance in resistant isolates | Joint appearance | Ranked by     |
|--------------------|--------------------------------------|------------|----------------------------------|------------------|---------------|
| <i>embC_R927R</i>  | All lineages                         | 7756       | 2101, 914, 1546, 870             | 2215             | MLRF and SLRF |
| <i>embA_C76C</i>   | Animal and Central Asia              | 1630       | 955, 549, 848, 421               | 962              | MLRF and SLRF |
| <i>rpoB_A1075A</i> | All except for European              | 3678       | 1268, 599, 950, 540              | 1364             | MLRF and SLRF |
| <i>embB_G18G</i>   | Central Asia, East Asia and European | 26         | 8, 2, 4, 3                       | 3                | MLRF and SLRF |

## SUPPLEMENTARY G

We carried out the following experiments in order to confirm co-occurrence of resistance and the existence of additional resistance-associated mutations to those reported in the literature:

- known drug-resistant variants for a given drug extracted from F3 (e.g., for PZA, *pncA* and *rpsA* variants from F3);
- all variants in drug-associated genes for a given drug (e.g. for PZA, all variants in *pncA* and *rpsA* from F2); and
- all variants in F1.

Considering 1 and 2 allows us to quantify mutations that are not within the current library of known mutations but which are important in classifying resistance, while steps 2 and 3 would allow the identification of co-occurrence patterns. We analysed all features with an importance of more than 0.001 and found the following mutations as possible candidates. Only mutations that appeared in more than a lineage and that are dominant in resistant isolates are listed:

- Unknown mutations that might be important for classifying resistance: *embB\_G406C*, *embB\_Y319C*, *embA\_C-4T*, *embR\_L217V*, *embB\_L402V*, *rpoB\_L430R*, *pncA\_Y103C*, *pncA\_A-11T*, *pncA\_F94C*, *pncA\_V44G*, *pncA\_V155M*, *pncA\_V9G*, and *pncA\_T100P*;
- Mutations that possibly represent the resistance co-occurrence patterns: *katG\_S315T*, *rpoB\_S450L*, *embB\_M306V*, *rpoB\_D435V*, *rpoB\_H445Y*, *pncA\_H57D*, *embB\_M306I*, *embB\_Q497R*, *rpoB\_H445D*, *rpoB\_V170F*, *rpoB\_S450W*, *katG\_S315N*, *pncA\_A-11G*, *rpoB\_H445L*, *embB\_D354A*, *pncA\_Q10P*, *rpoB\_D435Y*, *embA\_C-12T*, *rpoB\_H445R*, *embB\_G406A*, *fabG1\_G-17T*, *pncA\_H57R*, *embA\_C-16T*, *pncA\_V7G*, *embB\_G406S*, and *rpoB\_H445C*.

---

**SUPPLEMENTARY H****Table S17.** The number of resistant isolates remained after dropping isolates with any known resistant-associated mutation.

| Drug | INH | EMB | RIF | PZA | FDR | MDR |
|------|-----|-----|-----|-----|-----|-----|
| F4   | 168 | 50  | 104 | 76  | 17  | 64  |
| F5   | 169 | 50  | 104 | 174 | 17  | 64  |
